# Supplementary material
Source: PubMed Central journal article supplement (PMC8025672)
Supplement: NIHMS1661433-supplement-Supplemental_Tables.pdf [file NIHMS1661433-supplement-Supplemental_Tables.pdf]

Table 1: Sample Characteristics

| Sample ID | Sample Disease Status              | Age | Gender | Core Code                | Date Procured | Number of Cells in IPF vs Normal Control Dataset | nUMI in IPF vs Normal Control Dataset | Number of Cells in Normal Only Dataset (V1 + V2) | nUMI in Normal Only Dataset (V1 + V2) | 10X Genomics Chemistry |
|-----------|------------------------------------|-----|--------|--------------------------|---------------|--------------------------------------------------|---------------------------------------|--------------------------------------------------|---------------------------------------|------------------------|
| SC14      | normal control                     | 76  | Male   | 2016-110-CORE            | 7/21/16       | N/A                                              | N/A                                   | 706                                              | 4317191                               | V1                     |
| SC31      | normal control                     | 56  | Male   | 2016-174-CORE            | 11/7/16       | N/A                                              | N/A                                   | 1043                                             | 4833562                               | V1                     |
| SC31D     | normal control                     |     |        |                          |               | N/A                                              | N/A                                   | 1185                                             | 5106812                               |                        |
| SC45      | normal control                     | 55  | Male   | EV2017-001/2017-007-CORE | 1/11/17       | N/A                                              | N/A                                   | 3389                                             | 19439465                              | V2                     |
| SC56      | normal control                     | 57  | Female | 2017-025-CORE            | 2/16/17       | 4334                                             | 23350541                              | 4436                                             | 23987800                              | V2                     |
| SC59      | normal control                     | 18  | Male   | 2017-029-CORE            | 3/8/17        | 3155                                             | 26073460                              | 3274                                             | 26480182                              | V2                     |
| SC155     | normal control, lower lobe         | 23  | Female | 2017-105-CORE            | 10/31/17      | 4122                                             | 30394745                              | 4255                                             | 30860302                              | V2                     |
| SC156     | normal control, upper lobe         |     |        |                          |               | 5620                                             | 37272812                              | 5932                                             | 38105570                              |                        |
| SC87      | IPF Lung Lower Lobe                | 70  | Female | 2017-064-LT              | 6/12/17       | 5651                                             | 35754473                              | N/A                                              | N/A                                   | V2                     |
| SC88      | IPF Lung Upper Lobe                |     |        |                          |               | 4717                                             | 39847444                              | N/A                                              | N/A                                   |                        |
| SC89      | IPF Lung Lower Lobe - Mac depleted |     |        |                          |               | 4828                                             | 37248650                              | N/A                                              | N/A                                   |                        |
| SC93      | IPF Lung Lower Lobe                | 69  | Male   | 2017-067-LT              | 6/15/17       | 3220                                             | 27824488                              | N/A                                              | N/A                                   | V2                     |
| SC94      | IPF Lung Upper Lobe                |     |        |                          |               | 2146                                             | 28935362                              | N/A                                              | N/A                                   |                        |
| SC95      | IPF Lung Lower Lobe - Mac depleted |     |        |                          |               | 2700                                             | 27767815                              | N/A                                              | N/A                                   |                        |
| SC153     | IPF Lung Lower Lobe                | 69  | Female | 2017-100-LT              | 10/24/17      | 3259                                             | 25034857                              | N/A                                              | N/A                                   | V2                     |
| SC154     | IPF Lung Upper Lobe                |     |        |                          |               | 4019                                             | 30182560                              | N/A                                              | N/A                                   |                        |

**Table S2.** Top 50 most highly upregulated genes in each cluster in healthy control lungs (Figure 1), comparing each cluster with all other clusters (FindAllMarkers function Seurat). P-values as indicated; pct.1=percent of cells expressing the gene in the cluster of interest; pct.2=percent of all other cells expressing the gene of interest (pct refers to the percent of cells expressing at least one transcript (UMI)).

|    | p_val | avg_logFC  | pct.1 | pct.2 | p_val_adj | cluster | gene         |
|----|-------|------------|-------|-------|-----------|---------|--------------|
| 1  | 0     | 2.33665717 | 0.957 | 0.257 | 0         | 0       | FABP4        |
| 2  | 0     | 1.90940431 | 0.978 | 0.355 | 0         | 0       | C1QB         |
| 3  | 0     | 1.77631765 | 0.978 | 0.372 | 0         | 0       | C1QA         |
| 4  | 0     | 1.5571591  | 0.94  | 0.295 | 0         | 0       | FBP1         |
| 5  | 0     | 1.49796948 | 0.836 | 0.076 | 0         | 0       | INHBA        |
| 6  | 0     | 1.46365823 | 0.968 | 0.507 | 0         | 0       | CD52         |
| 7  | 0     | 1.45950995 | 0.94  | 0.262 | 0         | 0       | C1QC         |
| 8  | 0     | 1.35195574 | 0.82  | 0.076 | 0         | 0       | RP11-598F7.3 |
| 9  | 0     | 1.33340106 | 0.983 | 0.409 | 0         | 0       | APOC1        |
| 10 | 0     | 1.24187721 | 0.985 | 0.682 | 0         | 0       | CD74         |
| 11 | 0     | 1.22411928 | 0.99  | 0.644 | 0         | 0       | HLA-DRA      |
| 12 | 0     | 1.19414495 | 0.909 | 0.253 | 0         | 0       | MCEMP1       |
| 13 | 0     | 1.17726892 | 0.937 | 0.325 | 0         | 0       | HLA-DQB1     |
| 14 | 0     | 1.17551735 | 0.905 | 0.208 | 0         | 0       | MSR1         |
| 15 | 0     | 1.16118796 | 0.621 | 0.038 | 0         | 0       | RBP4         |
| 16 | 0     | 1.14297359 | 0.963 | 0.482 | 0         | 0       | HLA-DRB1     |
| 17 | 0     | 1.11624392 | 0.97  | 0.472 | 0         | 0       | ALOX5AP      |
| 18 | 0     | 1.08705001 | 0.974 | 0.505 | 0         | 0       | HLA-DPA1     |
| 19 | 0     | 1.07640138 | 0.94  | 0.456 | 0         | 0       | GRN          |
| 20 | 0     | 1.06150665 | 0.939 | 0.367 | 0         | 0       | CD68         |
| 21 | 0     | 1.05377587 | 0.91  | 0.294 | 0         | 0       | SERPINA1     |
| 22 | 0     | 1.04097992 | 0.558 | 0.064 | 0         | 0       | RND3         |
| 23 | 0     | 1.03765015 | 0.877 | 0.221 | 0         | 0       | TREM1        |
| 24 | 0     | 1.02524912 | 0.954 | 0.334 | 0         | 0       | ACP5         |
| 25 | 0     | 1.02435688 | 0.915 | 0.278 | 0         | 0       | VSIG4        |
| 26 | 0     | 1.02357192 | 0.391 | 0.048 | 0         | 0       | FABP3        |
| 27 | 0     | 1.01867205 | 0.752 | 0.321 | 0         | 0       | HLA-DRB5     |
| 28 | 0     | 1.00677019 | 0.878 | 0.205 | 0         | 0       | HLA-DQA1     |
| 29 | 0     | 0.99444315 | 0.971 | 0.59  | 0         | 0       | LGALS3       |
| 30 | 0     | 0.99434077 | 0.805 | 0.071 | 0         | 0       | PHLDA3       |
| 31 | 0     | 0.97754621 | 0.973 | 0.489 | 0         | 0       | HLA-DPB1     |
| 32 | 0     | 0.96486772 | 0.903 | 0.278 | 0         | 0       | CXCL16       |
| 33 | 0     | 0.96040351 | 0.932 | 0.349 | 0         | 0       | HLA-DMA      |
| 34 | 0     | 0.94968674 | 0.691 | 0.127 | 0         | 0       | AKR1C3       |
| 35 | 0     | 0.94629291 | 0.913 | 0.269 | 0         | 0       | SNX10        |
| 36 | 0     | 0.94467606 | 0.918 | 0.275 | 0         | 0       | MARCO        |
| 37 | 0     | 0.94231746 | 0.9   | 0.28  | 0         | 0       | SPI1         |
| 38 | 0     | 0.92987341 | 0.955 | 0.571 | 0         | 0       | TSP0         |
| 39 | 0     | 0.92871041 | 0.786 | 0.119 | 0         | 0       | LPL          |
| 40 | 0     | 0.91886764 | 0.708 | 0.132 | 0         | 0       | MIR3945HG    |
| 41 | 0     | 0.90965573 | 1     | 0.994 | 0         | 0       | FTL          |
| 42 | 0     | 0.89873985 | 0.942 | 0.346 | 0         | 0       | GCHFR        |
| 43 | 0     | 0.88918251 | 0.858 | 0.196 | 0         | 0       | CYP27A1      |
| 44 | 0     | 0.88800443 | 0.981 | 0.543 | 0         | 0       | TYROBP       |

|    |   |            |       |       |   |   |         |
|----|---|------------|-------|-------|---|---|---------|
| 45 | 0 | 0.88609206 | 0.906 | 0.35  | 0 | 0 | ALDH2   |
| 46 | 0 | 0.87771027 | 0.907 | 0.376 | 0 | 0 | LY6E    |
| 47 | 0 | 0.87460803 | 0.921 | 0.356 | 0 | 0 | CAPG    |
| 48 | 0 | 0.87323239 | 0.626 | 0.116 | 0 | 0 | CES1    |
| 49 | 0 | 0.85871054 | 0.941 | 0.414 | 0 | 0 | CTSC    |
| 50 | 0 | 0.85462038 | 0.982 | 0.632 | 0 | 0 | CSTB    |
| 51 | 0 | 1.74821117 | 0.721 | 0.356 | 0 | 1 | APOE    |
| 52 | 0 | 1.54912662 | 0.598 | 0.288 | 0 | 1 | CCL18   |
| 53 | 0 | 1.50260004 | 0.499 | 0.172 | 0 | 1 | HMOX1   |
| 54 | 0 | 1.28694002 | 0.952 | 0.5   | 0 | 1 | CTSB    |
| 55 | 0 | 1.2793309  | 0.87  | 0.419 | 0 | 1 | CTSL    |
| 56 | 0 | 1.24028463 | 0.976 | 0.588 | 0 | 1 | CTSD    |
| 57 | 0 | 1.10806518 | 0.567 | 0.249 | 0 | 1 | CCL20   |
| 58 | 0 | 1.04871613 | 1     | 0.994 | 0 | 1 | FTL     |
| 59 | 0 | 1.01922916 | 0.976 | 0.66  | 0 | 1 | LGALS1  |
| 60 | 0 | 1.01401639 | 0.763 | 0.303 | 0 | 1 | GPNMB   |
| 61 | 0 | 0.96579775 | 0.796 | 0.334 | 0 | 1 | CD163   |
| 62 | 0 | 0.93580209 | 0.893 | 0.493 | 0 | 1 | AP2S1   |
| 63 | 0 | 0.93232039 | 0.794 | 0.332 | 0 | 1 | MRC1    |
| 64 | 0 | 0.93106208 | 0.767 | 0.319 | 0 | 1 | MARCO   |
| 65 | 0 | 0.92552422 | 0.965 | 0.628 | 0 | 1 | GPX1    |
| 66 | 0 | 0.90916411 | 0.72  | 0.328 | 0 | 1 | CTSZ    |
| 67 | 0 | 0.90418895 | 0.739 | 0.318 | 0 | 1 | OLR1    |
| 68 | 0 | 0.88687599 | 0.833 | 0.452 | 0 | 1 | APOC1   |
| 69 | 0 | 0.87349625 | 0.759 | 0.398 | 0 | 1 | GCHFR   |
| 70 | 0 | 0.86431263 | 0.37  | 0.128 | 0 | 1 | AGRP    |
| 71 | 0 | 0.86007864 | 0.833 | 0.37  | 0 | 1 | ACP5    |
| 72 | 0 | 0.84249672 | 0.963 | 0.639 | 0 | 1 | CSTB    |
| 73 | 0 | 0.83928962 | 0.96  | 0.609 | 0 | 1 | PSAP    |
| 74 | 0 | 0.8127535  | 0.439 | 0.161 | 0 | 1 | KCNMA1  |
| 75 | 0 | 0.80807218 | 0.841 | 0.472 | 0 | 1 | H2AFY   |
| 76 | 0 | 0.80480595 | 0.786 | 0.446 | 0 | 1 | CXCL3   |
| 77 | 0 | 0.78848878 | 0.941 | 0.602 | 0 | 1 | GLUL    |
| 78 | 0 | 0.7842532  | 0.712 | 0.363 | 0 | 1 | BLVRB   |
| 79 | 0 | 0.78197023 | 0.886 | 0.552 | 0 | 1 | EMP3    |
| 80 | 0 | 0.77311053 | 0.573 | 0.203 | 0 | 1 | MS4A6A  |
| 81 | 0 | 0.75041875 | 0.906 | 0.555 | 0 | 1 | ATP6V1F |
| 82 | 0 | 0.74980721 | 0.634 | 0.278 | 0 | 1 | MS4A4A  |
| 83 | 0 | 0.72510249 | 0.868 | 0.513 | 0 | 1 | PLIN2   |
| 84 | 0 | 0.72420475 | 0.383 | 0.139 | 0 | 1 | LGMN    |
| 85 | 0 | 0.72368336 | 0.646 | 0.287 | 0 | 1 | MMP19   |
| 86 | 0 | 0.72150215 | 0.847 | 0.381 | 0 | 1 | MS4A7   |
| 87 | 0 | 0.71872521 | 0.259 | 0.034 | 0 | 1 | TMIGD3  |
| 88 | 0 | 0.70846813 | 0.952 | 0.645 | 0 | 1 | GPX4    |
| 89 | 0 | 0.70597207 | 0.881 | 0.555 | 0 | 1 | ATP6V0B |
| 90 | 0 | 0.7001531  | 0.532 | 0.186 | 0 | 1 | RNASE1  |
| 91 | 0 | 0.69513826 | 0.713 | 0.357 | 0 | 1 | THBD    |
| 92 | 0 | 0.69365968 | 0.365 | 0.066 | 0 | 1 | PLA2G7  |
| 93 | 0 | 0.68252383 | 0.844 | 0.395 | 0 | 1 | CD68    |
| 94 | 0 | 0.67989046 | 0.39  | 0.078 | 0 | 1 | FPR3    |

|     |           |            |       |       |           |                |
|-----|-----------|------------|-------|-------|-----------|----------------|
| 95  | 0         | 0.67846503 | 0.949 | 0.734 | 0         | 1 CD63         |
| 96  | 0         | 0.67827858 | 0.96  | 0.53  | 0         | 1 FCER1G       |
| 97  | 0         | 0.65887172 | 0.721 | 0.333 | 0         | 1 VSIG4        |
| 98  | 0         | 0.65681503 | 0.589 | 0.276 | 0         | 1 ALCAM        |
| 99  | 0         | 0.65661206 | 0.629 | 0.285 | 0         | 1 LINC01272    |
| 100 | 4.47E-277 | 0.8339406  | 0.47  | 0.245 | 1.51E-272 | 1 RETN         |
| 101 | 0         | 1.91208001 | 0.716 | 0.241 | 0         | 2 RGS1         |
| 102 | 0         | 1.88562707 | 0.934 | 0.399 | 0         | 2 CXCR4        |
| 103 | 0         | 1.82418461 | 0.906 | 0.573 | 0         | 2 ZFP36L2      |
| 104 | 0         | 1.63769818 | 0.661 | 0.296 | 0         | 2 IL7R         |
| 105 | 0         | 1.62987799 | 0.505 | 0.029 | 0         | 2 TRAC         |
| 106 | 0         | 1.60902407 | 0.915 | 0.646 | 0         | 2 TSC22D3      |
| 107 | 0         | 1.57710168 | 0.512 | 0.043 | 0         | 2 CD2          |
| 108 | 0         | 1.56436389 | 0.568 | 0.054 | 0         | 2 CD3D         |
| 109 | 0         | 1.5387524  | 0.38  | 0.017 | 0         | 2 GPR171       |
| 110 | 0         | 1.51777622 | 0.667 | 0.137 | 0         | 2 CD69         |
| 111 | 0         | 1.34089129 | 0.319 | 0.055 | 0         | 2 KLRB1        |
| 112 | 0         | 1.29844745 | 0.316 | 0.058 | 0         | 2 BATF         |
| 113 | 0         | 1.29665612 | 0.388 | 0.038 | 0         | 2 TRBC2        |
| 114 | 0         | 1.27548006 | 0.962 | 0.822 | 0         | 2 BTG1         |
| 115 | 0         | 1.27393843 | 0.47  | 0.089 | 0         | 2 CCL5         |
| 116 | 0         | 1.26659412 | 0.606 | 0.388 | 0         | 2 LEPROTL1     |
| 117 | 0         | 1.24794509 | 0.27  | 0.047 | 0         | 2 LTB          |
| 118 | 0         | 1.24452646 | 0.875 | 0.702 | 0         | 2 SARAF        |
| 119 | 0         | 1.23102191 | 0.35  | 0.04  | 0         | 2 TRBC1        |
| 120 | 0         | 1.22187198 | 0.6   | 0.34  | 0         | 2 CYTIP        |
| 121 | 0         | 1.21452397 | 0.297 | 0.007 | 0         | 2 TRAT1        |
| 122 | 0         | 1.19489539 | 0.302 | 0.021 | 0         | 2 CD96         |
| 123 | 0         | 1.18990095 | 0.573 | 0.142 | 0         | 2 IL32         |
| 124 | 0         | 1.15695361 | 0.631 | 0.424 | 0         | 2 PTPRC        |
| 125 | 0         | 1.15518654 | 0.381 | 0.093 | 0         | 2 RORA         |
| 126 | 0         | 1.14801964 | 0.343 | 0.059 | 0         | 2 CLEC2D       |
| 127 | 0         | 1.14201261 | 0.375 | 0.13  | 0         | 2 RP11-138A9.1 |
| 128 | 0         | 1.14019213 | 0.407 | 0.096 | 0         | 2 TUBA4A       |
| 129 | 0         | 1.11235845 | 0.294 | 0.068 | 0         | 2 RP11-138A9.2 |
| 130 | 0         | 1.10649967 | 0.6   | 0.208 | 0         | 2 ISG20        |
| 131 | 0         | 1.08612499 | 0.351 | 0.023 | 0         | 2 CD3E         |
| 132 | 0         | 1.08349224 | 0.432 | 0.112 | 0         | 2 SYTL3        |
| 133 | 0         | 1.04734257 | 0.691 | 0.481 | 0         | 2 CREM         |
| 134 | 0         | 1.03452303 | 0.659 | 0.387 | 0         | 2 DDIT4        |
| 135 | 0         | 1.0267809  | 0.346 | 0.101 | 0         | 2 PRDM1        |
| 136 | 0         | 1.0227563  | 0.369 | 0.121 | 0         | 2 CNOT6L       |
| 137 | 0         | 1.00245802 | 0.345 | 0.035 | 0         | 2 SPOCK2       |
| 138 | 0         | 0.99211577 | 0.37  | 0.115 | 0         | 2 PIK3IP1      |
| 139 | 0         | 0.99207283 | 0.363 | 0.11  | 0         | 2 FKBP11       |
| 140 | 0         | 0.97027438 | 0.323 | 0.055 | 0         | 2 ACAP1        |
| 141 | 0         | 0.96797073 | 0.353 | 0.091 | 0         | 2 FYN          |
| 142 | 1.29E-306 | 1.06945603 | 0.404 | 0.151 | 4.33E-302 | 2 RHOH         |
| 143 | 6.04E-299 | 1.0700146  | 0.431 | 0.177 | 2.04E-294 | 2 SOCS1        |
| 144 | 3.92E-274 | 1.11765483 | 0.475 | 0.237 | 1.32E-269 | 2 STK4         |

|     |           |            |       |       |           |   |               |
|-----|-----------|------------|-------|-------|-----------|---|---------------|
| 145 | 3.01E-208 | 1.25881811 | 0.591 | 0.445 | 1.01E-203 | 2 | HMGB2         |
| 146 | 6.19E-196 | 1.04480617 | 0.362 | 0.171 | 2.09E-191 | 2 | AIM1          |
| 147 | 3.02E-191 | 1.00404937 | 0.499 | 0.324 | 1.02E-186 | 2 | PPP2R5C       |
| 148 | 3.10E-117 | 0.98289939 | 0.402 | 0.237 | 1.05E-112 | 2 | CCL4          |
| 149 | 6.53E-100 | 0.99075555 | 0.36  | 0.237 | 2.20E-95  | 2 | TOB1          |
| 150 | 1.46E-52  | 1.03300998 | 0.377 | 0.33  | 4.94E-48  | 2 | ANKRD28       |
| 151 | 0         | 3.01860626 | 0.815 | 0.288 | 0         | 3 | S100A8        |
| 152 | 0         | 2.77642125 | 0.903 | 0.489 | 0         | 3 | S100A9        |
| 153 | 0         | 2.22297536 | 0.418 | 0.034 | 0         | 3 | SERPINB2      |
| 154 | 0         | 2.20653382 | 0.891 | 0.372 | 0         | 3 | THBS1         |
| 155 | 0         | 2.1081079  | 0.404 | 0.019 | 0         | 3 | S100A12       |
| 156 | 0         | 2.0405544  | 0.694 | 0.283 | 0         | 3 | IL1B          |
| 157 | 0         | 2.00208547 | 0.78  | 0.202 | 0         | 3 | EREG          |
| 158 | 0         | 1.99391901 | 0.685 | 0.076 | 0         | 3 | FCN1          |
| 159 | 0         | 1.9588284  | 0.645 | 0.172 | 0         | 3 | G0S2          |
| 160 | 0         | 1.77349969 | 0.657 | 0.184 | 0         | 3 | VCAN          |
| 161 | 0         | 1.6579192  | 0.937 | 0.53  | 0         | 3 | TIMP1         |
| 162 | 0         | 1.59125489 | 0.926 | 0.591 | 0         | 3 | NAMPT         |
| 163 | 0         | 1.58126849 | 0.899 | 0.5   | 0         | 3 | PLAUR         |
| 164 | 0         | 1.50311812 | 0.608 | 0.071 | 0         | 3 | CD300E        |
| 165 | 0         | 1.48808149 | 0.621 | 0.278 | 0         | 3 | RP11-1143G9.4 |
| 166 | 0         | 1.39131682 | 0.434 | 0.055 | 0         | 3 | IL1R2         |
| 167 | 0         | 1.33159543 | 0.882 | 0.47  | 0         | 3 | AIF1          |
| 168 | 0         | 1.30911215 | 0.765 | 0.364 | 0         | 3 | C5AR1         |
| 169 | 0         | 1.30298648 | 0.797 | 0.41  | 0         | 3 | LST1          |
| 170 | 0         | 1.30266388 | 0.562 | 0.237 | 0         | 3 | PPIF          |
| 171 | 0         | 1.24681978 | 0.641 | 0.243 | 0         | 3 | CD14          |
| 172 | 0         | 1.20811785 | 0.898 | 0.605 | 0         | 3 | SOD2          |
| 173 | 0         | 1.19229468 | 0.431 | 0.047 | 0         | 3 | CTB-61M7.2    |
| 174 | 0         | 1.16717891 | 0.477 | 0.076 | 0         | 3 | FGL2          |
| 175 | 0         | 1.14094951 | 0.996 | 0.851 | 0         | 3 | SAT1          |
| 176 | 0         | 1.13499883 | 0.828 | 0.446 | 0         | 3 | SAMSN1        |
| 177 | 0         | 1.13408819 | 0.431 | 0.081 | 0         | 3 | NLRP3         |
| 178 | 0         | 1.13240025 | 0.454 | 0.045 | 0         | 3 | CFP           |
| 179 | 0         | 1.1276619  | 0.483 | 0.178 | 0         | 3 | FPR2          |
| 180 | 0         | 1.11588148 | 0.557 | 0.207 | 0         | 3 | FPR1          |
| 181 | 0         | 1.11057338 | 0.836 | 0.5   | 0         | 3 | AREG          |
| 182 | 0         | 1.08314116 | 0.687 | 0.312 | 0         | 3 | RGS2          |
| 183 | 0         | 1.07275531 | 0.521 | 0.188 | 0         | 3 | BASP1         |
| 184 | 0         | 1.06860455 | 0.608 | 0.244 | 0         | 3 | MXD1          |
| 185 | 0         | 1.06463331 | 0.853 | 0.533 | 0         | 3 | TYMP          |
| 186 | 0         | 1.06416342 | 0.903 | 0.528 | 0         | 3 | LYZ           |
| 187 | 0         | 1.05626318 | 0.703 | 0.378 | 0         | 3 | SLC2A3        |
| 188 | 0         | 1.05368909 | 0.824 | 0.531 | 0         | 3 | COTL1         |
| 189 | 0         | 1.03914374 | 0.978 | 0.786 | 0         | 3 | SRGN          |
| 190 | 0         | 1.01346759 | 0.811 | 0.584 | 0         | 3 | ATP1B3        |
| 191 | 0         | 0.99271821 | 0.426 | 0.08  | 0         | 3 | CD93          |
| 192 | 0         | 0.94846618 | 0.482 | 0.108 | 0         | 3 | SERPINB9      |
| 193 | 0         | 0.94757    | 0.953 | 0.589 | 0         | 3 | FCER1G        |
| 194 | 0         | 0.91845834 | 0.597 | 0.237 | 0         | 3 | GPR183        |

|     |           |            |       |       |           |   |          |
|-----|-----------|------------|-------|-------|-----------|---|----------|
| 195 | 5.01E-257 | 0.91837664 | 0.643 | 0.404 | 1.69E-252 | 3 | RILPL2   |
| 196 | 1.52E-215 | 1.38752247 | 0.643 | 0.382 | 5.11E-211 | 3 | CXCL8    |
| 197 | 4.89E-209 | 0.96762595 | 0.534 | 0.282 | 1.65E-204 | 3 | INSIG1   |
| 198 | 3.47E-181 | 1.13027531 | 0.577 | 0.363 | 1.17E-176 | 3 | BCL2A1   |
| 199 | 1.73E-140 | 0.90841638 | 0.261 | 0.094 | 5.84E-136 | 3 | PTGS2    |
| 200 | 1.16E-45  | 1.21344605 | 0.324 | 0.224 | 3.91E-41  | 3 | C15orf48 |
| 201 | 0         | 3.12378934 | 0.795 | 0.058 | 0         | 4 | CLDN5    |
| 202 | 0         | 2.89051331 | 0.411 | 0.028 | 0         | 4 | FCN3     |
| 203 | 0         | 2.87962721 | 0.401 | 0.018 | 0         | 4 | ACKR1    |
| 204 | 0         | 2.81300746 | 0.712 | 0.073 | 0         | 4 | SPARCL1  |
| 205 | 0         | 2.73179189 | 0.683 | 0.132 | 0         | 4 | MT1M     |
| 206 | 0         | 2.69608887 | 0.738 | 0.123 | 0         | 4 | TM4SF1   |
| 207 | 0         | 2.51836055 | 0.452 | 0.084 | 0         | 4 | IL6      |
| 208 | 0         | 2.50491838 | 0.464 | 0.071 | 0         | 4 | MT1A     |
| 209 | 0         | 2.42928233 | 0.551 | 0.018 | 0         | 4 | VWF      |
| 210 | 0         | 2.41324641 | 0.873 | 0.192 | 0         | 4 | IFI27    |
| 211 | 0         | 2.38632547 | 0.736 | 0.255 | 0         | 4 | EPAS1    |
| 212 | 0         | 2.19202864 | 0.353 | 0.027 | 0         | 4 | CSF3     |
| 213 | 0         | 2.18173408 | 0.602 | 0.205 | 0         | 4 | CCL2     |
| 214 | 0         | 2.17622103 | 0.672 | 0.091 | 0         | 4 | TIMP3    |
| 215 | 0         | 2.16515325 | 0.631 | 0.264 | 0         | 4 | EMP1     |
| 216 | 0         | 2.15678443 | 0.728 | 0.347 | 0         | 4 | MT1X     |
| 217 | 0         | 1.94802202 | 0.858 | 0.478 | 0         | 4 | IFITM3   |
| 218 | 0         | 1.92791967 | 0.275 | 0.042 | 0         | 4 | SERPINE1 |
| 219 | 0         | 1.91894696 | 0.744 | 0.466 | 0         | 4 | SOCS3    |
| 220 | 0         | 1.91304135 | 0.517 | 0.045 | 0         | 4 | AQP1     |
| 221 | 0         | 1.91203751 | 0.946 | 0.706 | 0         | 4 | MT2A     |
| 222 | 0         | 1.89816535 | 0.478 | 0.012 | 0         | 4 | FAM107A  |
| 223 | 0         | 1.86661683 | 0.686 | 0.314 | 0         | 4 | PDLIM1   |
| 224 | 0         | 1.86193261 | 0.301 | 0.018 | 0         | 4 | TMEM100  |
| 225 | 0         | 1.85574725 | 0.52  | 0.081 | 0         | 4 | HYAL2    |
| 226 | 0         | 1.81374239 | 0.293 | 0.046 | 0         | 4 | C10orf10 |
| 227 | 0         | 1.80827556 | 0.482 | 0.023 | 0         | 4 | RAMP2    |
| 228 | 0         | 1.76456576 | 0.589 | 0.216 | 0         | 4 | ICAM1    |
| 229 | 0         | 1.75374089 | 0.405 | 0.025 | 0         | 4 | SRPX     |
| 230 | 0         | 1.71842047 | 0.569 | 0.263 | 0         | 4 | TSC22D1  |
| 231 | 0         | 1.71674169 | 0.441 | 0.006 | 0         | 4 | CLEC14A  |
| 232 | 0         | 1.70451168 | 0.594 | 0.264 | 0         | 4 | PECAM1   |
| 233 | 0         | 1.70030845 | 0.444 | 0.085 | 0         | 4 | EGFL7    |
| 234 | 0         | 1.70012289 | 0.545 | 0.083 | 0         | 4 | GNG11    |
| 235 | 0         | 1.69525735 | 0.66  | 0.29  | 0         | 4 | GPX3     |
| 236 | 0         | 1.68560573 | 0.581 | 0.209 | 0         | 4 | IGFBP7   |
| 237 | 0         | 1.67716393 | 0.374 | 0.012 | 0         | 4 | RAMP3    |
| 238 | 0         | 1.66757398 | 0.554 | 0.149 | 0         | 4 | TFPI     |
| 239 | 0         | 1.62643141 | 0.459 | 0.062 | 0         | 4 | SDPR     |
| 240 | 0         | 1.62181306 | 0.418 | 0.046 | 0         | 4 | PRSS23   |
| 241 | 0         | 1.6072625  | 0.715 | 0.488 | 0         | 4 | CD59     |
| 242 | 0         | 1.60538196 | 0.401 | 0.089 | 0         | 4 | TNFSF10  |
| 243 | 0         | 1.58786036 | 0.434 | 0.024 | 0         | 4 | PCAT19   |
| 244 | 0         | 1.58345172 | 0.513 | 0.134 | 0         | 4 | MGP      |

|     |           |            |       |       |           |   |          |
|-----|-----------|------------|-------|-------|-----------|---|----------|
| 245 | 0         | 1.57559714 | 0.593 | 0.098 | 0         | 4 | CAV1     |
| 246 | 0         | 1.56492831 | 0.438 | 0.099 | 0         | 4 | SPARC    |
| 247 | 0         | 1.55928146 | 0.374 | 0.059 | 0         | 4 | SLC9A3R2 |
| 248 | 1.72E-294 | 1.66615272 | 0.589 | 0.283 | 5.78E-290 | 4 | MT1E     |
| 249 | 2.44E-279 | 1.65315503 | 0.364 | 0.103 | 8.22E-275 | 4 | CLU      |
| 250 | 9.84E-220 | 1.56522585 | 0.403 | 0.152 | 3.31E-215 | 4 | HES1     |
| 251 | 0         | 3.49027951 | 0.832 | 0.03  | 0         | 5 | GNLY     |
| 252 | 0         | 2.98774989 | 0.942 | 0.085 | 0         | 5 | NKG7     |
| 253 | 0         | 2.80095119 | 0.871 | 0.047 | 0         | 5 | GZMB     |
| 254 | 0         | 2.77411266 | 0.902 | 0.202 | 0         | 5 | CCL4     |
| 255 | 0         | 2.44047866 | 0.761 | 0.023 | 0         | 5 | KLRD1    |
| 256 | 0         | 2.39307956 | 0.746 | 0.025 | 0         | 5 | PRF1     |
| 257 | 0         | 2.35207413 | 0.81  | 0.076 | 0         | 5 | CCL5     |
| 258 | 0         | 2.21335576 | 0.826 | 0.074 | 0         | 5 | CST7     |
| 259 | 0         | 2.18714965 | 0.752 | 0.067 | 0         | 5 | CD7      |
| 260 | 0         | 2.16244557 | 0.559 | 0.005 | 0         | 5 | FGFBP2   |
| 261 | 0         | 1.95617216 | 0.62  | 0.086 | 0         | 5 | CTSW     |
| 262 | 0         | 1.89418923 | 0.636 | 0.037 | 0         | 5 | GZMA     |
| 263 | 0         | 1.88085393 | 0.504 | 0.018 | 0         | 5 | GZMH     |
| 264 | 0         | 1.86998193 | 0.505 | 0.05  | 0         | 5 | KLRB1    |
| 265 | 0         | 1.70117625 | 0.772 | 0.268 | 0         | 5 | DUSP2    |
| 266 | 0         | 1.651024   | 0.483 | 0.04  | 0         | 5 | SPON2    |
| 267 | 0         | 1.63012528 | 0.382 | 0.006 | 0         | 5 | KLRF1    |
| 268 | 0         | 1.58065194 | 0.478 | 0.028 | 0         | 5 | CD247    |
| 269 | 0         | 1.53587679 | 0.586 | 0.113 | 0         | 5 | SYTL3    |
| 270 | 0         | 1.5144061  | 0.913 | 0.422 | 0         | 5 | CXCR4    |
| 271 | 0         | 1.38962337 | 0.699 | 0.216 | 0         | 5 | ISG20    |
| 272 | 0         | 1.38209358 | 0.418 | 0.023 | 0         | 5 | GZMM     |
| 273 | 0         | 1.22711331 | 0.375 | 0.05  | 0         | 5 | TRBC1    |
| 274 | 0         | 1.19315578 | 0.639 | 0.16  | 0         | 5 | CD69     |
| 275 | 0         | 1.13723207 | 0.303 | 0.023 | 0         | 5 | SH2D2A   |
| 276 | 0         | 1.13086277 | 0.724 | 0.392 | 0         | 5 | DDIT4    |
| 277 | 0         | 1.07852987 | 0.254 | 0.003 | 0         | 5 | S1PR5    |
| 278 | 0         | 1.06267994 | 0.263 | 0.014 | 0         | 5 | PYHIN1   |
| 279 | 0         | 1.05376356 | 0.333 | 0.042 | 0         | 5 | LCK      |
| 280 | 0         | 1.04221511 | 0.341 | 0.055 | 0         | 5 | TRBC2    |
| 281 | 0         | 1.04083862 | 0.383 | 0.099 | 0         | 5 | FYN      |
| 282 | 0         | 1.03283936 | 0.844 | 0.591 | 0         | 5 | ZFP36L2  |
| 283 | 0         | 0.98901949 | 0.253 | 0.013 | 0         | 5 | SLA2     |
| 284 | 0         | 0.98196337 | 0.298 | 0.057 | 0         | 5 | PTPN7    |
| 285 | 6.20E-304 | 1.13284789 | 0.365 | 0.091 | 2.09E-299 | 5 | CD3D     |
| 286 | 8.39E-293 | 1.07953043 | 0.334 | 0.084 | 2.83E-288 | 5 | AKNA     |
| 287 | 6.03E-287 | 1.05257156 | 0.332 | 0.084 | 2.03E-282 | 5 | LIMD2    |
| 288 | 1.56E-272 | 1.10823589 | 0.731 | 0.487 | 5.25E-268 | 5 | CREM     |
| 289 | 1.19E-259 | 1.16984517 | 0.389 | 0.127 | 4.00E-255 | 5 | PIK3R1   |
| 290 | 2.43E-259 | 1.06060678 | 0.519 | 0.22  | 8.19E-255 | 5 | CORO1A   |
| 291 | 2.20E-243 | 1.12593578 | 0.712 | 0.515 | 7.43E-239 | 5 | ID2      |
| 292 | 1.07E-240 | 1.88468635 | 0.451 | 0.173 | 3.60E-236 | 5 | CCL3     |
| 293 | 1.96E-226 | 1.04520727 | 0.642 | 0.431 | 6.62E-222 | 5 | PTPRC    |
| 294 | 1.55E-209 | 1.67838534 | 0.297 | 0.086 | 5.21E-205 | 5 | CCL4L2   |

|     |           |            |       |       |           |            |
|-----|-----------|------------|-------|-------|-----------|------------|
| 295 | 1.41E-205 | 1.15301103 | 0.387 | 0.156 | 4.74E-201 | 5 BIN2     |
| 296 | 2.93E-205 | 0.99292484 | 0.416 | 0.168 | 9.89E-201 | 5 PLAC8    |
| 297 | 2.08E-197 | 0.99665779 | 0.598 | 0.388 | 7.01E-193 | 5 HCST     |
| 298 | 2.79E-197 | 1.10722888 | 0.546 | 0.327 | 9.41E-193 | 5 PPP2R5C  |
| 299 | 8.67E-135 | 1.00928644 | 0.316 | 0.137 | 2.92E-130 | 5 CHST12   |
| 300 | 5.93E-105 | 1.64294632 | 0.398 | 0.255 | 2.00E-100 | 5 CMC1     |
| 301 | 0         | 5.3787571  | 0.975 | 0.332 | 0         | 6 SFTPC    |
| 302 | 0         | 4.4719722  | 0.97  | 0.089 | 0         | 6 SFTPA1   |
| 303 | 0         | 4.41902793 | 0.951 | 0.087 | 0         | 6 SFTPA2   |
| 304 | 0         | 3.69481056 | 0.984 | 0.12  | 0         | 6 SFTPB    |
| 305 | 0         | 3.13308253 | 0.93  | 0.043 | 0         | 6 NAPSA    |
| 306 | 0         | 2.88606908 | 0.785 | 0.016 | 0         | 6 PGC      |
| 307 | 0         | 2.70256045 | 0.883 | 0.022 | 0         | 6 SFTPD    |
| 308 | 0         | 2.6102569  | 0.956 | 0.159 | 0         | 6 SLPI     |
| 309 | 0         | 2.42313643 | 0.896 | 0.05  | 0         | 6 SFTA2    |
| 310 | 0         | 2.18596524 | 0.803 | 0.029 | 0         | 6 SLC34A2  |
| 311 | 0         | 1.89386943 | 0.936 | 0.455 | 0         | 6 CYB5A    |
| 312 | 0         | 1.85014496 | 0.808 | 0.03  | 0         | 6 SFTA3    |
| 313 | 0         | 1.82907147 | 0.778 | 0.024 | 0         | 6 S100A14  |
| 314 | 0         | 1.78194073 | 0.784 | 0.037 | 0         | 6 MUC1     |
| 315 | 0         | 1.71393218 | 0.768 | 0.029 | 0         | 6 CXCL17   |
| 316 | 0         | 1.68191172 | 0.855 | 0.163 | 0         | 6 HOPX     |
| 317 | 0         | 1.60666179 | 0.697 | 0.03  | 0         | 6 PIGR     |
| 318 | 0         | 1.59656049 | 0.977 | 0.689 | 0         | 6 NPC2     |
| 319 | 0         | 1.55723308 | 0.674 | 0.021 | 0         | 6 PEBP4    |
| 320 | 0         | 1.54964167 | 0.856 | 0.345 | 0         | 6 MGST1    |
| 321 | 0         | 1.5417714  | 0.778 | 0.102 | 0         | 6 KRT18    |
| 322 | 0         | 1.53004965 | 0.656 | 0.071 | 0         | 6 C8orf4   |
| 323 | 0         | 1.50124655 | 0.806 | 0.383 | 0         | 6 CTSH     |
| 324 | 0         | 1.47372807 | 0.683 | 0.014 | 0         | 6 ABCA3    |
| 325 | 0         | 1.46885755 | 0.702 | 0.008 | 0         | 6 LAMP3    |
| 326 | 0         | 1.42095868 | 0.729 | 0.105 | 0         | 6 AK1      |
| 327 | 0         | 1.39186311 | 0.666 | 0.034 | 0         | 6 LRRK2    |
| 328 | 0         | 1.35052996 | 0.673 | 0.017 | 0         | 6 SDR16C5  |
| 329 | 0         | 1.30706987 | 0.74  | 0.256 | 0         | 6 AQP3     |
| 330 | 0         | 1.28952661 | 0.628 | 0.05  | 0         | 6 C11orf96 |
| 331 | 0         | 1.27550346 | 0.53  | 0.008 | 0         | 6 SLC6A14  |
| 332 | 0         | 1.256609   | 0.732 | 0.284 | 0         | 6 SDC4     |
| 333 | 0         | 1.23616995 | 0.78  | 0.121 | 0         | 6 SEPP1    |
| 334 | 0         | 1.20650481 | 0.641 | 0.018 | 0         | 6 C16orf89 |
| 335 | 0         | 1.19818467 | 0.549 | 0.013 | 0         | 6 WIF1     |
| 336 | 0         | 1.19051403 | 0.698 | 0.078 | 0         | 6 KRT8     |
| 337 | 0         | 1.18893924 | 0.689 | 0.05  | 0         | 6 ELF3     |
| 338 | 0         | 1.18877502 | 0.744 | 0.221 | 0         | 6 SPTSSA   |
| 339 | 0         | 1.18539543 | 0.696 | 0.098 | 0         | 6 LPCAT1   |
| 340 | 0         | 1.16965548 | 0.575 | 0.012 | 0         | 6 GKN2     |
| 341 | 0         | 1.15861219 | 0.636 | 0.021 | 0         | 6 MALL     |
| 342 | 0         | 1.13325525 | 0.623 | 0.043 | 0         | 6 AGR2     |
| 343 | 0         | 1.12651915 | 0.628 | 0.157 | 0         | 6 ERFFI1   |
| 344 | 0         | 1.12545702 | 0.619 | 0.031 | 0         | 6 SELENBP1 |



|     |           |            |       |       |           |            |
|-----|-----------|------------|-------|-------|-----------|------------|
| 345 | 0         | 1.07459559 | 0.521 | 0.005 | 0         | 6 PLA2G1B  |
| 346 | 0         | 1.07036684 | 0.642 | 0.066 | 0         | 6 DHCR24   |
| 347 | 0         | 1.05543327 | 0.703 | 0.065 | 0         | 6 KRT19    |
| 348 | 0         | 1.05234162 | 0.612 | 0.092 | 0         | 6 MBIP     |
| 349 | 0         | 1.04054267 | 0.544 | 0.005 | 0         | 6 C4BPA    |
| 350 | 5.00E-177 | 1.10477542 | 0.785 | 0.492 | 1.68E-172 | 6 CXCL2    |
| 351 | 0         | 4.12146204 | 0.866 | 0.074 | 0         | 7 DCN      |
| 352 | 0         | 3.21167359 | 0.651 | 0.019 | 0         | 7 LUM      |
| 353 | 0         | 3.049927   | 0.668 | 0.018 | 0         | 7 FBLN1    |
| 354 | 0         | 2.84094745 | 0.881 | 0.139 | 0         | 7 MGP      |
| 355 | 0         | 2.70287399 | 0.462 | 0.024 | 0         | 7 IGFBP6   |
| 356 | 0         | 2.61573163 | 0.614 | 0.081 | 0         | 7 CYR61    |
| 357 | 0         | 2.53770459 | 0.71  | 0.044 | 0         | 7 C1R      |
| 358 | 0         | 2.53006769 | 0.661 | 0.02  | 0         | 7 ADH1B    |
| 359 | 0         | 2.46036557 | 0.318 | 0.03  | 0         | 7 PTX3     |
| 360 | 0         | 2.44157229 | 0.618 | 0.127 | 0         | 7 A2M      |
| 361 | 0         | 2.40683546 | 0.663 | 0.029 | 0         | 7 C1S      |
| 362 | 0         | 2.35616506 | 0.494 | 0.038 | 0         | 7 TPM2     |
| 363 | 0         | 2.3054921  | 0.394 | 0.028 | 0         | 7 APOD     |
| 364 | 0         | 2.18741939 | 0.833 | 0.301 | 0         | 7 GPX3     |
| 365 | 0         | 2.15873058 | 0.636 | 0.04  | 0         | 7 RARRES2  |
| 366 | 0         | 2.14045237 | 0.506 | 0.056 | 0         | 7 CTGF     |
| 367 | 0         | 2.1204849  | 0.465 | 0.088 | 0         | 7 SERPINF1 |
| 368 | 0         | 2.11253413 | 0.601 | 0.012 | 0         | 7 MFAP4    |
| 369 | 0         | 2.09868608 | 0.491 | 0.076 | 0         | 7 MYL9     |
| 370 | 0         | 2.04148441 | 0.693 | 0.064 | 0         | 7 CALD1    |
| 371 | 0         | 2.02715787 | 0.506 | 0.021 | 0         | 7 CRYAB    |
| 372 | 0         | 2.01874376 | 0.512 | 0.007 | 0         | 7 COL1A2   |
| 373 | 0         | 2.00798138 | 0.564 | 0.011 | 0         | 7 PRELP    |
| 374 | 0         | 1.99772531 | 0.349 | 0.034 | 0         | 7 RARRES1  |
| 375 | 0         | 1.94983561 | 0.612 | 0.02  | 0         | 7 COL6A2   |
| 376 | 0         | 1.91716865 | 0.552 | 0.06  | 0         | 7 C11orf96 |
| 377 | 0         | 1.91534277 | 0.743 | 0.276 | 0         | 7 SERPING1 |
| 378 | 0         | 1.89165769 | 0.651 | 0.177 | 0         | 7 NNMT     |
| 379 | 0         | 1.83635305 | 0.647 | 0.134 | 0         | 7 SEPP1    |
| 380 | 0         | 1.79016364 | 0.412 | 0.032 | 0         | 7 PPP1R14A |
| 381 | 0         | 1.76158002 | 0.373 | 0.027 | 0         | 7 IGFBP5   |
| 382 | 0         | 1.73204971 | 0.519 | 0.015 | 0         | 7 CRISPLD2 |
| 383 | 0         | 1.70155469 | 0.41  | 0.011 | 0         | 7 TCF21    |
| 384 | 0         | 1.67070681 | 0.682 | 0.118 | 0         | 7 TIMP3    |
| 385 | 0         | 1.65224106 | 0.318 | 0.019 | 0         | 7 CCDC80   |
| 386 | 0         | 1.64207961 | 0.408 | 0.024 | 0         | 7 C7       |
| 387 | 0         | 1.63935185 | 0.434 | 0.042 | 0         | 7 GEM      |
| 388 | 0         | 1.63238268 | 0.416 | 0.041 | 0         | 7 LMCD1    |
| 389 | 0         | 1.61458029 | 0.775 | 0.101 | 0         | 7 SPARCL1  |
| 390 | 0         | 1.61383678 | 0.516 | 0.02  | 0         | 7 COL6A1   |
| 391 | 0         | 1.59900623 | 0.37  | 0.004 | 0         | 7 WISP2    |
| 392 | 3.06E-306 | 1.84476417 | 0.712 | 0.222 | 1.03E-301 | 7 IGFBP7   |
| 393 | 2.43E-288 | 1.59334614 | 0.367 | 0.055 | 8.18E-284 | 7 C10orf10 |
| 394 | 1.08E-253 | 2.43796585 | 0.344 | 0.057 | 3.65E-249 | 7 ACTA2    |

|     |           |            |       |       |           |   |          |
|-----|-----------|------------|-------|-------|-----------|---|----------|
| 395 | 2.18E-205 | 2.68389489 | 0.698 | 0.389 | 7.36E-201 | 7 | CFD      |
| 396 | 1.46E-194 | 2.84853248 | 0.459 | 0.132 | 4.90E-190 | 7 | TAGLN    |
| 397 | 5.84E-185 | 1.60210253 | 0.602 | 0.223 | 1.97E-180 | 7 | CCL2     |
| 398 | 4.75E-157 | 1.61572566 | 0.819 | 0.557 | 1.60E-152 | 7 | TIMP1    |
| 399 | 4.34E-142 | 1.67633219 | 0.724 | 0.483 | 1.46E-137 | 7 | GADD45B  |
| 400 | 9.22E-98  | 1.61391557 | 0.606 | 0.386 | 3.11E-93  | 7 | IER3     |
| 401 | 0         | 3.75518375 | 0.796 | 0.04  | 0         | 8 | AGER     |
| 402 | 0         | 3.4827253  | 0.799 | 0.144 | 0         | 8 | EMP2     |
| 403 | 0         | 3.15092784 | 0.855 | 0.178 | 0         | 8 | HOPX     |
| 404 | 0         | 3.08166215 | 0.731 | 0.071 | 0         | 8 | KRT7     |
| 405 | 0         | 2.82269576 | 0.57  | 0.027 | 0         | 8 | CEACAM6  |
| 406 | 0         | 2.63317832 | 0.646 | 0.081 | 0         | 8 | KRT19    |
| 407 | 0         | 2.55662643 | 0.696 | 0.123 | 0         | 8 | CAV1     |
| 408 | 0         | 2.24612005 | 0.53  | 0.07  | 0         | 8 | TSPAN13  |
| 409 | 0         | 2.22986345 | 0.631 | 0.075 | 0         | 8 | SFTA2    |
| 410 | 0         | 2.18903582 | 0.473 | 0.071 | 0         | 8 | GPRC5A   |
| 411 | 0         | 2.08074181 | 0.537 | 0.079 | 0         | 8 | MYL9     |
| 412 | 0         | 2.0792222  | 0.493 | 0.074 | 0         | 8 | FXD3     |
| 413 | 0         | 2.02465748 | 0.45  | 0.051 | 0         | 8 | CLIC3    |
| 414 | 0         | 1.96916248 | 0.417 | 0.047 | 0         | 8 | ANXA3    |
| 415 | 0         | 1.88700617 | 0.357 | 0.014 | 0         | 8 | TNNC1    |
| 416 | 0         | 1.82113652 | 0.337 | 0.01  | 0         | 8 | GGTLC1   |
| 417 | 0         | 1.76238125 | 0.277 | 0.006 | 0         | 8 | NTM      |
| 418 | 0         | 1.66765458 | 0.334 | 0.03  | 0         | 8 | CLDN18   |
| 419 | 0         | 1.48083398 | 0.266 | 0.011 | 0         | 8 | MSLN     |
| 420 | 0         | 1.47605851 | 0.292 | 0.007 | 0         | 8 | SCEL     |
| 421 | 5.77E-305 | 1.87645211 | 0.424 | 0.057 | 1.94E-300 | 8 | CYP4B1   |
| 422 | 4.78E-300 | 1.70081111 | 0.347 | 0.038 | 1.61E-295 | 8 | C19orf33 |
| 423 | 3.98E-293 | 2.04848811 | 0.483 | 0.08  | 1.34E-288 | 8 | TACSTD2  |
| 424 | 5.69E-291 | 1.9422626  | 0.43  | 0.063 | 1.92E-286 | 8 | LMO7     |
| 425 | 9.25E-268 | 1.43191413 | 0.468 | 0.073 | 3.12E-263 | 8 | NAPSA    |
| 426 | 3.83E-266 | 1.47786337 | 0.276 | 0.026 | 1.29E-261 | 8 | AQP4     |
| 427 | 1.73E-260 | 2.03205913 | 0.601 | 0.144 | 5.83E-256 | 8 | ADIRF    |
| 428 | 5.88E-249 | 1.83417557 | 0.444 | 0.077 | 1.98E-244 | 8 | CAV2     |
| 429 | 8.29E-239 | 1.83329916 | 0.394 | 0.063 | 2.79E-234 | 8 | EPCAM    |
| 430 | 1.30E-225 | 1.5157202  | 0.603 | 0.149 | 4.38E-221 | 8 | SFTPBP   |
| 431 | 1.05E-205 | 1.53440566 | 0.287 | 0.037 | 3.55E-201 | 8 | SFTA1P   |
| 432 | 1.35E-205 | 1.50109461 | 0.274 | 0.034 | 4.54E-201 | 8 | CST6     |
| 433 | 7.56E-194 | 1.45339767 | 0.439 | 0.09  | 2.55E-189 | 8 | WFDC2    |
| 434 | 2.37E-188 | 1.2623904  | 0.252 | 0.031 | 7.99E-184 | 8 | ANKRD29  |
| 435 | 1.34E-176 | 1.66536052 | 0.432 | 0.098 | 4.51E-172 | 8 | KRT8     |
| 436 | 7.47E-166 | 1.78094609 | 0.47  | 0.125 | 2.52E-161 | 8 | KRT18    |
| 437 | 9.04E-166 | 1.85974012 | 0.636 | 0.25  | 3.05E-161 | 8 | RNASE1   |
| 438 | 1.50E-156 | 1.78341601 | 0.375 | 0.084 | 5.05E-152 | 8 | FOLR1    |
| 439 | 4.61E-156 | 1.32381026 | 0.279 | 0.045 | 1.55E-151 | 8 | PEBP4    |
| 440 | 1.83E-147 | 1.26872045 | 0.256 | 0.04  | 6.18E-143 | 8 | NKX2-1   |
| 441 | 6.41E-121 | 1.38255983 | 0.294 | 0.063 | 2.16E-116 | 8 | LIMCH1   |
| 442 | 8.67E-108 | 1.78851793 | 0.696 | 0.529 | 2.92E-103 | 8 | DSTN     |
| 443 | 7.79E-101 | 1.32562523 | 0.286 | 0.069 | 2.63E-96  | 8 | NEDD4L   |
| 444 | 1.58E-97  | 1.54169038 | 0.36  | 0.112 | 5.31E-93  | 8 | SLC39A8  |

|     |          |            |       |       |          |   |               |
|-----|----------|------------|-------|-------|----------|---|---------------|
| 445 | 7.31E-51 | 1.59684476 | 0.58  | 0.507 | 2.46E-46 | 8 | CD55          |
| 446 | 1.65E-48 | 1.43533002 | 0.39  | 0.206 | 5.56E-44 | 8 | NGFRAP1       |
| 447 | 5.51E-42 | 1.38942104 | 0.344 | 0.175 | 1.86E-37 | 8 | TNFRSF12A     |
| 448 | 1.12E-36 | 1.4977114  | 0.455 | 0.336 | 3.77E-32 | 8 | CD151         |
| 449 | 2.51E-24 | 1.26801245 | 0.309 | 0.186 | 8.47E-20 | 8 | RARRES3       |
| 450 | 3.33E-13 | 1.24850267 | 0.372 | 0.335 | 1.12E-08 | 8 | RAB11FIP1     |
| 451 | 0        | 3.7746035  | 0.926 | 0.044 | 0        | 9 | TPPP3         |
| 452 | 0        | 3.71620008 | 0.944 | 0.026 | 0        | 9 | CAPS          |
| 453 | 0        | 3.12243728 | 0.86  | 0.014 | 0        | 9 | C9orf24       |
| 454 | 0        | 3.07672093 | 0.845 | 0.01  | 0        | 9 | C20orf85      |
| 455 | 0        | 3.05270729 | 0.841 | 0.008 | 0        | 9 | TMEM190       |
| 456 | 0        | 2.83333406 | 0.878 | 0.008 | 0        | 9 | RSPH1         |
| 457 | 0        | 2.73461512 | 0.823 | 0.018 | 0        | 9 | TSPAN1        |
| 458 | 0        | 2.71548772 | 0.833 | 0.006 | 0        | 9 | FAM183A       |
| 459 | 0        | 2.68731942 | 0.814 | 0.055 | 0        | 9 | AGR3          |
| 460 | 0        | 2.65960641 | 0.826 | 0.008 | 0        | 9 | C1orf194      |
| 461 | 0        | 2.55738974 | 0.826 | 0.06  | 0        | 9 | ELF3          |
| 462 | 0        | 2.55161477 | 0.846 | 0.162 | 0        | 9 | CETN2         |
| 463 | 0        | 2.36621908 | 0.789 | 0.007 | 0        | 9 | C5orf49       |
| 464 | 0        | 2.35297339 | 0.799 | 0.011 | 0        | 9 | PIFO          |
| 465 | 0        | 2.35182833 | 0.774 | 0.005 | 0        | 9 | C11orf88      |
| 466 | 0        | 2.28562611 | 0.819 | 0.003 | 0        | 9 | LRRIQ1        |
| 467 | 0        | 2.24881081 | 0.664 | 0.006 | 0        | 9 | C2orf40       |
| 468 | 0        | 2.2366094  | 0.782 | 0.024 | 0        | 9 | DNAAF1        |
| 469 | 0        | 2.2347522  | 0.772 | 0.009 | 0        | 9 | C9orf116      |
| 470 | 0        | 2.19392612 | 0.775 | 0.103 | 0        | 9 | MORN2         |
| 471 | 0        | 2.14096284 | 0.728 | 0.005 | 0        | 9 | DYNLRB2       |
| 472 | 0        | 2.12357807 | 0.77  | 0.005 | 0        | 9 | MS4A8         |
| 473 | 0        | 2.11725231 | 0.601 | 0.012 | 0        | 9 | GSTA1         |
| 474 | 0        | 2.11574822 | 0.736 | 0.004 | 0        | 9 | CAPSL         |
| 475 | 0        | 2.10562403 | 0.718 | 0.004 | 0        | 9 | SNTN          |
| 476 | 0        | 2.10309543 | 0.743 | 0.052 | 0        | 9 | AGR2          |
| 477 | 0        | 2.06132937 | 0.735 | 0.005 | 0        | 9 | ZMYND10       |
| 478 | 0        | 2.01723107 | 0.676 | 0.05  | 0        | 9 | CYP4B1        |
| 479 | 0        | 2.00797214 | 0.804 | 0.184 | 0        | 9 | ODF3B         |
| 480 | 0        | 1.97716667 | 0.726 | 0.057 | 0        | 9 | CLDN4         |
| 481 | 0        | 1.94510483 | 0.758 | 0.068 | 0        | 9 | FXYD3         |
| 482 | 0        | 1.94281755 | 0.586 | 0.071 | 0        | 9 | GDF15         |
| 483 | 0        | 1.94222215 | 0.779 | 0.089 | 0        | 9 | KRT8          |
| 484 | 0        | 1.90962589 | 0.733 | 0.034 | 0        | 9 | EFHC1         |
| 485 | 0        | 1.89903095 | 0.688 | 0.005 | 0        | 9 | AC013264.2    |
| 486 | 0        | 1.88558612 | 0.725 | 0.004 | 0        | 9 | CCDC78        |
| 487 | 0        | 1.88122407 | 0.715 | 0.029 | 0        | 9 | FAM229B       |
| 488 | 0        | 1.87814062 | 0.725 | 0.071 | 0        | 9 | MRPS31        |
| 489 | 0        | 1.86497657 | 0.688 | 0.002 | 0        | 9 | CFAP126       |
| 490 | 0        | 1.84163796 | 0.698 | 0.026 | 0        | 9 | CLDN3         |
| 491 | 0        | 1.84130382 | 0.618 | 0.003 | 0        | 9 | RP11-356K23.1 |
| 492 | 0        | 1.83426818 | 0.672 | 0.003 | 0        | 9 | MORN5         |
| 493 | 0        | 1.83245523 | 0.703 | 0.005 | 0        | 9 | FOXJ1         |
| 494 | 0        | 1.81904054 | 0.755 | 0.082 | 0        | 9 | WFDC2         |

|     |           |            |       |       |           |    |          |
|-----|-----------|------------|-------|-------|-----------|----|----------|
| 495 | 0         | 1.81453714 | 0.642 | 0.003 | 0         | 9  | FABP6    |
| 496 | 0         | 1.8104374  | 0.701 | 0.002 | 0         | 9  | FAM92B   |
| 497 | 0         | 1.78153606 | 0.689 | 0.008 | 0         | 9  | CCDC146  |
| 498 | 0         | 1.76371077 | 0.694 | 0.025 | 0         | 9  | TCTEX1D2 |
| 499 | 0         | 1.73603286 | 0.598 | 0.023 | 0         | 9  | CD24     |
| 500 | 3.55E-250 | 2.07273604 | 0.875 | 0.546 | 1.20E-245 | 9  | PRDX5    |
| 501 | 0         | 3.1394945  | 0.389 | 0.014 | 0         | 10 | CCL17    |
| 502 | 0         | 1.7529664  | 0.929 | 0.253 | 0         | 10 | GPR183   |
| 503 | 0         | 1.22775093 | 0.568 | 0.078 | 0         | 10 | IL1R2    |
| 504 | 0         | 1.17633346 | 0.624 | 0.061 | 0         | 10 | FCGR2B   |
| 505 | 0         | 1.1412034  | 0.297 | 0.014 | 0         | 10 | S100B    |
| 506 | 0         | 1.13794604 | 0.43  | 0.027 | 0         | 10 | F13A1    |
| 507 | 0         | 0.94184967 | 0.434 | 0.027 | 0         | 10 | CLEC10A  |
| 508 | 0         | 0.85932132 | 0.382 | 0.024 | 0         | 10 | PKIB     |
| 509 | 2.04E-278 | 1.64706598 | 0.923 | 0.337 | 6.87E-274 | 10 | HLA-DQA1 |
| 510 | 6.78E-272 | 1.75538277 | 0.987 | 0.584 | 2.29E-267 | 10 | HLA-DPB1 |
| 511 | 6.22E-261 | 0.95658732 | 0.69  | 0.155 | 2.09E-256 | 10 | RNASE6   |
| 512 | 3.37E-256 | 1.71369453 | 0.844 | 0.292 | 1.13E-251 | 10 | INSIG1   |
| 513 | 4.93E-254 | 0.90471322 | 0.648 | 0.15  | 1.66E-249 | 10 | CSF2RA   |
| 514 | 2.37E-245 | 0.75052355 | 0.32  | 0.033 | 7.99E-241 | 10 | RAMP1    |
| 515 | 5.07E-245 | 1.11992732 | 0.682 | 0.154 | 1.71E-240 | 10 | DUSP4    |
| 516 | 3.20E-240 | 1.60684279 | 0.989 | 0.598 | 1.08E-235 | 10 | HLA-DPA1 |
| 517 | 1.45E-238 | 1.46207661 | 0.994 | 0.742 | 4.90E-234 | 10 | CD74     |
| 518 | 5.67E-237 | 1.58737495 | 0.966 | 0.445 | 1.91E-232 | 10 | HLA-DQB1 |
| 519 | 1.07E-229 | 1.43463435 | 0.998 | 0.712 | 3.60E-225 | 10 | HLA-DRA  |
| 520 | 4.88E-223 | 1.03998028 | 0.874 | 0.282 | 1.64E-218 | 10 | RGS1     |
| 521 | 7.34E-213 | 1.37654272 | 0.981 | 0.576 | 2.47E-208 | 10 | HLA-DRB1 |
| 522 | 4.09E-202 | 1.46070373 | 0.741 | 0.246 | 1.38E-197 | 10 | HLA-DQA2 |
| 523 | 8.02E-199 | 0.86240148 | 0.513 | 0.102 | 2.70E-194 | 10 | FGL2     |
| 524 | 4.03E-195 | 0.87385207 | 0.583 | 0.148 | 1.36E-190 | 10 | CD86     |
| 525 | 1.03E-193 | 1.14389476 | 0.786 | 0.27  | 3.47E-189 | 10 | MS4A6A   |
| 526 | 4.16E-190 | 1.19626473 | 0.853 | 0.333 | 1.40E-185 | 10 | RGS2     |
| 527 | 3.20E-172 | 0.98679173 | 0.94  | 0.464 | 1.08E-167 | 10 | HLA-DMA  |
| 528 | 2.51E-171 | 0.78205185 | 0.56  | 0.131 | 8.45E-167 | 10 | SERPINB9 |
| 529 | 4.84E-163 | 0.98265837 | 0.831 | 0.357 | 1.63E-158 | 10 | HLA-DMB  |
| 530 | 2.16E-159 | 1.24148137 | 0.776 | 0.321 | 7.26E-155 | 10 | CD83     |
| 531 | 3.70E-157 | 1.41722232 | 0.885 | 0.521 | 1.25E-152 | 10 | AREG     |
| 532 | 3.39E-136 | 1.48150078 | 0.821 | 0.405 | 1.14E-131 | 10 | HLA-DRB5 |
| 533 | 8.66E-130 | 1.05584865 | 0.633 | 0.224 | 2.92E-125 | 10 | C15orf48 |
| 534 | 1.44E-128 | 0.74945268 | 0.703 | 0.266 | 4.86E-124 | 10 | MXD1     |
| 535 | 1.51E-126 | 1.09320176 | 0.812 | 0.424 | 5.09E-122 | 10 | REL      |
| 536 | 3.18E-119 | 0.75974196 | 0.782 | 0.368 | 1.07E-114 | 10 | RGS10    |
| 537 | 7.66E-117 | 0.83769077 | 0.784 | 0.361 | 2.58E-112 | 10 | FCGR2A   |
| 538 | 1.06E-112 | 0.75039974 | 0.508 | 0.164 | 3.56E-108 | 10 | AXL      |
| 539 | 1.15E-111 | 0.71409263 | 0.915 | 0.553 | 3.89E-107 | 10 | TYMP     |
| 540 | 1.73E-104 | 0.74708184 | 0.549 | 0.198 | 5.82E-100 | 10 | CPVL     |
| 541 | 3.89E-102 | 0.81462199 | 0.876 | 0.527 | 1.31E-97  | 10 | PLAUR    |
| 542 | 6.36E-98  | 0.85320273 | 0.897 | 0.597 | 2.14E-93  | 10 | ATP1B3   |
| 543 | 4.28E-95  | 0.88971893 | 0.6   | 0.244 | 1.44E-90  | 10 | EREG     |
| 544 | 9.21E-95  | 0.86387935 | 0.97  | 0.695 | 3.10E-90  | 10 | CST3     |

|     |           |            |       |       |           |    |          |
|-----|-----------|------------|-------|-------|-----------|----|----------|
| 545 | 4.94E-92  | 0.86343555 | 0.84  | 0.534 | 1.67E-87  | 10 | HERPUD1  |
| 546 | 7.58E-92  | 0.79710878 | 0.654 | 0.298 | 2.55E-87  | 10 | SGK1     |
| 547 | 2.39E-77  | 0.73382065 | 0.496 | 0.2   | 8.05E-73  | 10 | JAML     |
| 548 | 7.24E-62  | 0.72929823 | 0.695 | 0.411 | 2.44E-57  | 10 | THBS1    |
| 549 | 1.03E-42  | 0.98960218 | 0.633 | 0.399 | 3.49E-38  | 10 | CXCL8    |
| 550 | 2.72E-40  | 1.04018234 | 0.43  | 0.208 | 9.16E-36  | 10 | GOS2     |
| 551 | 0         | 5.32149053 | 0.968 | 0.037 | 0         | 11 | CCL21    |
| 552 | 0         | 2.99964634 | 0.91  | 0.037 | 0         | 11 | TFF3     |
| 553 | 0         | 2.62195579 | 0.912 | 0.107 | 0         | 11 | GNG11    |
| 554 | 0         | 2.60274679 | 0.846 | 0.015 | 0         | 11 | MMRN1    |
| 555 | 0         | 2.54489504 | 0.926 | 0.228 | 0         | 11 | IGFBP7   |
| 556 | 0         | 2.31840961 | 0.668 | 0.063 | 0         | 11 | RGS16    |
| 557 | 0         | 2.23033518 | 0.87  | 0.144 | 0         | 11 | ADIRF    |
| 558 | 0         | 2.10885255 | 0.755 | 0.056 | 0         | 11 | AKAP12   |
| 559 | 0         | 2.03440434 | 0.864 | 0.171 | 0         | 11 | TFPI     |
| 560 | 0         | 2.01577581 | 0.819 | 0.043 | 0         | 11 | PPFIBP1  |
| 561 | 0         | 1.97810276 | 0.729 | 0.018 | 0         | 11 | SNCG     |
| 562 | 0         | 1.92241223 | 0.816 | 0.082 | 0         | 11 | SDPR     |
| 563 | 0         | 1.85996186 | 0.801 | 0.109 | 0         | 11 | ECSCR.1  |
| 564 | 0         | 1.66007745 | 0.545 | 0.017 | 0         | 11 | LYVE1    |
| 565 | 0         | 1.58197445 | 0.856 | 0.105 | 0         | 11 | CLDN5    |
| 566 | 0         | 1.4872159  | 0.58  | 0.023 | 0         | 11 | APOLD1   |
| 567 | 0         | 1.47639063 | 0.769 | 0.117 | 0         | 11 | CNN3     |
| 568 | 0         | 1.47162975 | 0.755 | 0.113 | 0         | 11 | CLU      |
| 569 | 0         | 1.46325587 | 0.814 | 0.126 | 0         | 11 | TIMP3    |
| 570 | 0         | 1.4119823  | 0.638 | 0.063 | 0         | 11 | FXVD6    |
| 571 | 0         | 1.38603236 | 0.535 | 0.008 | 0         | 11 | TM4SF18  |
| 572 | 0         | 1.38590158 | 0.604 | 0.017 | 0         | 11 | GGT5     |
| 573 | 0         | 1.38029405 | 0.566 | 0.013 | 0         | 11 | PDPN     |
| 574 | 0         | 1.33247546 | 0.564 | 0.066 | 0         | 11 | PLPP1    |
| 575 | 0         | 1.28754895 | 0.327 | 0.003 | 0         | 11 | NTS      |
| 576 | 0         | 1.26262282 | 0.793 | 0.127 | 0         | 11 | CAV1     |
| 577 | 0         | 1.2623182  | 0.654 | 0.083 | 0         | 11 | IGFBP4   |
| 578 | 0         | 1.23960201 | 0.67  | 0.089 | 0         | 11 | CRIP2    |
| 579 | 0         | 1.23381336 | 0.601 | 0.019 | 0         | 11 | KANK3    |
| 580 | 0         | 1.18147354 | 0.529 | 0.037 | 0         | 11 | CNKS3    |
| 581 | 0         | 1.17051714 | 0.689 | 0.075 | 0         | 11 | CALD1    |
| 582 | 2.73E-305 | 1.24913834 | 0.601 | 0.076 | 9.19E-301 | 11 | SLC9A3R2 |
| 583 | 5.30E-297 | 1.77793332 | 0.856 | 0.183 | 1.79E-292 | 11 | NNMT     |
| 584 | 8.43E-287 | 1.15296391 | 0.396 | 0.035 | 2.84E-282 | 11 | IGF1     |
| 585 | 1.23E-286 | 1.37485039 | 0.678 | 0.107 | 4.13E-282 | 11 | HYAL2    |
| 586 | 1.73E-262 | 1.74150313 | 0.378 | 0.034 | 5.81E-258 | 11 | IGFBP5   |
| 587 | 4.10E-258 | 1.29463251 | 0.811 | 0.162 | 1.38E-253 | 11 | TM4SF1   |
| 588 | 3.49E-245 | 1.304238   | 0.598 | 0.101 | 1.18E-240 | 11 | PROCR    |
| 589 | 6.90E-238 | 1.72607998 | 0.827 | 0.23  | 2.33E-233 | 11 | APP      |
| 590 | 6.79E-221 | 1.44423984 | 0.646 | 0.124 | 2.29E-216 | 11 | MYC      |
| 591 | 3.34E-182 | 1.175405   | 0.428 | 0.061 | 1.12E-177 | 11 | EFEMP1   |
| 592 | 4.30E-145 | 1.16502806 | 0.588 | 0.157 | 1.45E-140 | 11 | NRP2     |
| 593 | 2.21E-140 | 1.46453084 | 0.62  | 0.165 | 7.45E-136 | 11 | HES1     |
| 594 | 1.13E-139 | 1.31312148 | 0.915 | 0.55  | 3.82E-135 | 11 | HSPB1    |

|     |           |            |       |       |           |    |          |
|-----|-----------|------------|-------|-------|-----------|----|----------|
| 595 | 1.58E-137 | 1.22115066 | 0.918 | 0.502 | 5.33E-133 | 11 | IFITM3   |
| 596 | 5.32E-127 | 1.28621269 | 0.875 | 0.501 | 1.79E-122 | 11 | CD59     |
| 597 | 2.63E-121 | 1.23009345 | 0.787 | 0.392 | 8.85E-117 | 11 | RAB11A   |
| 598 | 4.77E-107 | 1.21849228 | 0.779 | 0.403 | 1.61E-102 | 11 | GYPC     |
| 599 | 1.01E-90  | 1.17108513 | 0.638 | 0.23  | 3.41E-86  | 11 | CCL2     |
| 600 | 1.87E-54  | 1.15250372 | 0.729 | 0.434 | 6.31E-50  | 11 | HSPA1A   |
| 601 | 0         | 4.33205516 | 0.693 | 0.022 | 0         | 12 | BPIFB1   |
| 602 | 0         | 3.62475358 | 0.428 | 0.017 | 0         | 12 | MSMB     |
| 603 | 0         | 3.4892615  | 0.952 | 0.185 | 0         | 12 | SLPI     |
| 604 | 0         | 3.173089   | 0.931 | 0.087 | 0         | 12 | WFDC2    |
| 605 | 0         | 2.98611301 | 0.708 | 0.03  | 0         | 12 | LCN2     |
| 606 | 0         | 2.88703723 | 0.575 | 0.043 | 0         | 12 | TFF3     |
| 607 | 0         | 2.49702562 | 0.765 | 0.051 | 0         | 12 | PIGR     |
| 608 | 0         | 2.25611487 | 0.804 | 0.053 | 0         | 12 | CXCL17   |
| 609 | 0         | 2.11783583 | 0.738 | 0.06  | 0         | 12 | AGR2     |
| 610 | 0         | 2.04903585 | 0.271 | 0.003 | 0         | 12 | MUC5AC   |
| 611 | 0         | 1.62256951 | 0.696 | 0.086 | 0         | 12 | KRT19    |
| 612 | 0         | 1.609411   | 0.66  | 0.009 | 0         | 12 | KLK11    |
| 613 | 0         | 1.59063806 | 0.675 | 0.082 | 0         | 12 | TACSTD2  |
| 614 | 0         | 1.45104576 | 0.66  | 0.071 | 0         | 12 | ELF3     |
| 615 | 0         | 1.40469024 | 0.63  | 0.065 | 0         | 12 | CLDN4    |
| 616 | 0         | 1.31544826 | 0.395 | 0.015 | 0         | 12 | TMEM45A  |
| 617 | 0         | 1.28466222 | 0.497 | 0.012 | 0         | 12 | TSPAN8   |
| 618 | 0         | 1.21752943 | 0.458 | 0.02  | 0         | 12 | GSTA1    |
| 619 | 0         | 1.15694429 | 0.482 | 0.041 | 0         | 12 | C16orf89 |
| 620 | 0         | 1.15199053 | 0.518 | 0.031 | 0         | 12 | TSPAN1   |
| 621 | 0         | 1.13559261 | 0.262 | 0.002 | 0         | 12 | CXCL6    |
| 622 | 0         | 1.12788327 | 0.554 | 0.052 | 0         | 12 | S100A14  |
| 623 | 0         | 1.0747736  | 0.452 | 0.012 | 0         | 12 | CP       |
| 624 | 0         | 0.98089521 | 0.361 | 0.002 | 0         | 12 | CYP2F1   |
| 625 | 0         | 0.97507116 | 0.319 | 0.005 | 0         | 12 | AQP5     |
| 626 | 3.17E-296 | 1.94319366 | 0.59  | 0.071 | 1.07E-291 | 12 | S100P    |
| 627 | 1.07E-273 | 1.07994492 | 0.623 | 0.077 | 3.61E-269 | 12 | FXYD3    |
| 628 | 2.00E-270 | 1.04447152 | 0.623 | 0.08  | 6.75E-266 | 12 | KRT7     |
| 629 | 1.37E-267 | 0.98588762 | 0.569 | 0.065 | 4.60E-263 | 12 | MUC1     |
| 630 | 1.89E-265 | 5.4212904  | 0.889 | 0.24  | 6.37E-261 | 12 | SCGB3A1  |
| 631 | 2.10E-253 | 0.97818175 | 0.53  | 0.059 | 7.06E-249 | 12 | CYP4B1   |
| 632 | 1.10E-246 | 1.0886037  | 0.578 | 0.074 | 3.69E-242 | 12 | GPRC5A   |
| 633 | 2.13E-242 | 1.2315254  | 0.593 | 0.084 | 7.19E-238 | 12 | FOLR1    |
| 634 | 4.76E-236 | 1.36621112 | 0.72  | 0.125 | 1.61E-231 | 12 | KRT18    |
| 635 | 3.71E-204 | 1.1487897  | 0.467 | 0.06  | 1.25E-199 | 12 | AKR1C1   |
| 636 | 2.53E-193 | 5.80718671 | 0.91  | 0.402 | 8.51E-189 | 12 | SCGB1A1  |
| 637 | 2.08E-189 | 1.21060633 | 0.593 | 0.1   | 7.00E-185 | 12 | KRT8     |
| 638 | 1.79E-184 | 1.06426262 | 0.482 | 0.073 | 6.02E-180 | 12 | MDK      |
| 639 | 2.11E-176 | 2.23010607 | 0.623 | 0.13  | 7.11E-172 | 12 | CXCL1    |
| 640 | 4.33E-176 | 1.07326374 | 0.476 | 0.068 | 1.46E-171 | 12 | AGR3     |
| 641 | 6.76E-140 | 4.88319865 | 0.515 | 0.111 | 2.28E-135 | 12 | SCGB3A2  |
| 642 | 1.99E-123 | 1.59844689 | 0.867 | 0.472 | 6.71E-119 | 12 | CYB5A    |
| 643 | 6.56E-111 | 1.56832761 | 0.578 | 0.154 | 2.21E-106 | 12 | SFTPB    |
| 644 | 4.13E-110 | 1.10210763 | 0.413 | 0.079 | 1.39E-105 | 12 | GDF15    |

|     |           |            |       |       |           |                  |
|-----|-----------|------------|-------|-------|-----------|------------------|
| 645 | 4.67E-101 | 1.03915654 | 0.524 | 0.138 | 1.57E-96  | 12 SOX4          |
| 646 | 6.60E-98  | 1.26141949 | 0.572 | 0.158 | 2.22E-93  | 12 MGP           |
| 647 | 1.16E-80  | 1.0849573  | 0.753 | 0.363 | 3.90E-76  | 12 MGST1         |
| 648 | 2.88E-77  | 0.97685053 | 0.518 | 0.166 | 9.70E-73  | 12 NCOA7         |
| 649 | 3.10E-64  | 2.32040615 | 0.271 | 0.058 | 1.04E-59  | 12 SAA1          |
| 650 | 8.23E-54  | 1.45656866 | 0.684 | 0.401 | 2.77E-49  | 12 CXCL8         |
| 651 | 0         | 4.76862862 | 0.97  | 0.005 | 0         | 13 TPSAB1        |
| 652 | 0         | 4.58066287 | 0.949 | 0.005 | 0         | 13 TPSB2         |
| 653 | 0         | 2.54995313 | 0.695 | 0.002 | 0         | 13 CPA3          |
| 654 | 0         | 2.48558992 | 0.716 | 0.049 | 0         | 13 HPGDS         |
| 655 | 0         | 2.05373599 | 0.598 | 0.001 | 0         | 13 MS4A2         |
| 656 | 0         | 2.04272389 | 0.538 | 0.008 | 0         | 13 RGS13         |
| 657 | 0         | 2.02985128 | 0.517 | 0.017 | 0         | 13 GATA2         |
| 658 | 0         | 1.84981542 | 0.48  | 0.001 | 0         | 13 C1orf186      |
| 659 | 0         | 1.68912015 | 0.462 | 0.002 | 0         | 13 KIT           |
| 660 | 0         | 1.58186538 | 0.423 | 0.009 | 0         | 13 MAOB          |
| 661 | 0         | 1.5488918  | 0.495 | 0.025 | 0         | 13 IL1RL1        |
| 662 | 0         | 1.41207587 | 0.35  | 0.001 | 0         | 13 SLC18A2       |
| 663 | 0         | 1.21839173 | 0.323 | 0.001 | 0         | 13 RP11-354E11.2 |
| 664 | 0         | 1.17524112 | 0.266 | 0.008 | 0         | 13 FCER1A        |
| 665 | 0         | 1.06772939 | 0.251 | 0     | 0         | 13 HDC           |
| 666 | 1.67E-291 | 2.78280153 | 0.879 | 0.187 | 5.64E-287 | 13 CD69          |
| 667 | 2.10E-266 | 1.34441738 | 0.426 | 0.039 | 7.08E-262 | 13 LTC4S         |
| 668 | 3.58E-207 | 1.66107382 | 0.477 | 0.066 | 1.21E-202 | 13 VWA5A         |
| 669 | 9.80E-187 | 1.0724165  | 0.335 | 0.034 | 3.30E-182 | 13 ITM2C         |
| 670 | 3.92E-165 | 1.50293181 | 0.489 | 0.082 | 1.32E-160 | 13 BATF          |
| 671 | 7.19E-153 | 1.8078713  | 0.822 | 0.287 | 2.42E-148 | 13 RGS1          |
| 672 | 2.66E-148 | 1.98716488 | 0.937 | 0.524 | 8.96E-144 | 13 AREG          |
| 673 | 4.39E-139 | 1.95117145 | 0.804 | 0.338 | 1.48E-134 | 13 RGS2          |
| 674 | 1.04E-114 | 1.74203817 | 0.61  | 0.192 | 3.52E-110 | 13 GPR65         |
| 675 | 1.16E-112 | 0.96696934 | 0.52  | 0.118 | 3.91E-108 | 13 CLU           |
| 676 | 1.58E-110 | 2.11877902 | 0.725 | 0.3   | 5.32E-106 | 13 BIRC3         |
| 677 | 1.63E-110 | 1.11803809 | 0.976 | 0.929 | 5.48E-106 | 13 H3F3B         |
| 678 | 2.14E-100 | 1.55099527 | 0.822 | 0.545 | 7.21E-96  | 13 LAPTM4A       |
| 679 | 8.22E-92  | 0.89811461 | 0.982 | 0.962 | 2.77E-87  | 13 MALAT1        |
| 680 | 7.91E-83  | 0.99765952 | 0.946 | 0.801 | 2.66E-78  | 13 SRGN          |
| 681 | 4.04E-74  | 1.34919621 | 0.393 | 0.104 | 1.36E-69  | 13 PTGS2         |
| 682 | 1.49E-72  | 1.22599547 | 0.508 | 0.175 | 5.03E-68  | 13 RHOH          |
| 683 | 2.38E-69  | 1.38898475 | 0.731 | 0.413 | 8.01E-65  | 13 DDIT4         |
| 684 | 4.62E-62  | 1.56187603 | 0.556 | 0.27  | 1.56E-57  | 13 CPM           |
| 685 | 7.44E-59  | 1.51019138 | 0.55  | 0.257 | 2.51E-54  | 13 HPGD          |
| 686 | 1.82E-58  | 1.36028806 | 0.498 | 0.201 | 6.15E-54  | 13 SOCS1         |
| 687 | 8.46E-55  | 0.92238697 | 0.873 | 0.806 | 2.85E-50  | 13 NFKBIA        |
| 688 | 1.22E-47  | 1.18743825 | 0.737 | 0.596 | 4.12E-43  | 13 LMNA          |
| 689 | 1.87E-46  | 0.96221774 | 0.846 | 0.748 | 6.29E-42  | 13 ANXA1         |
| 690 | 2.35E-46  | 0.96239636 | 0.807 | 0.675 | 7.93E-42  | 13 TSC22D3       |
| 691 | 2.60E-38  | 0.94465441 | 0.677 | 0.477 | 8.77E-34  | 13 SAMSN1        |
| 692 | 2.42E-33  | 0.98409101 | 0.622 | 0.446 | 8.15E-29  | 13 FOSB          |
| 693 | 1.24E-31  | 0.95626786 | 0.471 | 0.26  | 4.17E-27  | 13 NFKBIZ        |
| 694 | 1.48E-31  | 0.92702175 | 0.722 | 0.66  | 4.98E-27  | 13 SELK          |

|     |           |            |       |       |           |    |          |
|-----|-----------|------------|-------|-------|-----------|----|----------|
| 695 | 1.85E-31  | 0.96042619 | 0.592 | 0.43  | 6.23E-27  | 13 | CKLF     |
| 696 | 2.23E-31  | 0.93169861 | 0.64  | 0.464 | 7.51E-27  | 13 | TNFAIP3  |
| 697 | 2.48E-30  | 1.02183577 | 0.356 | 0.162 | 8.37E-26  | 13 | DUSP6    |
| 698 | 7.00E-25  | 0.96624926 | 0.444 | 0.272 | 2.36E-20  | 13 | RAC2     |
| 699 | 9.45E-23  | 0.99534053 | 0.326 | 0.167 | 3.18E-18  | 13 | CTNNB1   |
| 700 | 9.79E-21  | 0.93439286 | 0.474 | 0.334 | 3.30E-16  | 13 | ANKRD28  |
| 701 | 0         | 1.87460992 | 0.773 | 0.014 | 0         | 14 | KIAA0101 |
| 702 | 0         | 1.40477783 | 0.629 | 0.007 | 0         | 14 | TYMS     |
| 703 | 0         | 1.27272219 | 0.485 | 0.004 | 0         | 14 | UBE2C    |
| 704 | 0         | 1.20541759 | 0.638 | 0.019 | 0         | 14 | TK1      |
| 705 | 0         | 1.01571255 | 0.454 | 0.001 | 0         | 14 | MKI67    |
| 706 | 0         | 0.99927321 | 0.433 | 0.002 | 0         | 14 | RRM2     |
| 707 | 0         | 0.93519026 | 0.475 | 0.012 | 0         | 14 | CDK1     |
| 708 | 0         | 0.89699582 | 0.445 | 0.003 | 0         | 14 | BIRC5    |
| 709 | 0         | 0.86838835 | 0.515 | 0.023 | 0         | 14 | CENPM    |
| 710 | 0         | 0.85189112 | 0.399 | 0.011 | 0         | 14 | CDKN3    |
| 711 | 0         | 0.82331319 | 0.463 | 0.024 | 0         | 14 | NUSAP1   |
| 712 | 0         | 0.78660455 | 0.503 | 0.021 | 0         | 14 | ZWINT    |
| 713 | 0         | 0.72211818 | 0.393 | 0.004 | 0         | 14 | TOP2A    |
| 714 | 0         | 0.67526319 | 0.377 | 0.009 | 0         | 14 | CENPF    |
| 715 | 0         | 0.65494483 | 0.368 | 0.014 | 0         | 14 | CENPU    |
| 716 | 0         | 0.64382218 | 0.39  | 0.005 | 0         | 14 | CDT1     |
| 717 | 8.06E-237 | 0.64433072 | 0.469 | 0.051 | 2.71E-232 | 14 | CENPN    |
| 718 | 9.10E-233 | 0.71363547 | 0.466 | 0.051 | 3.06E-228 | 14 | GGH      |
| 719 | 3.84E-214 | 0.83776239 | 0.537 | 0.075 | 1.30E-209 | 14 | TMEM106C |
| 720 | 4.86E-214 | 0.84196574 | 0.598 | 0.096 | 1.64E-209 | 14 | CENPW    |
| 721 | 9.01E-214 | 0.7850672  | 0.509 | 0.067 | 3.04E-209 | 14 | SMC2     |
| 722 | 1.31E-208 | 1.24750021 | 0.561 | 0.084 | 4.43E-204 | 14 | PTTG1    |
| 723 | 1.24E-189 | 0.66194928 | 0.54  | 0.081 | 4.16E-185 | 14 | SKA2     |
| 724 | 3.26E-172 | 1.84128234 | 0.856 | 0.314 | 1.10E-167 | 14 | STMN1    |
| 725 | 7.64E-161 | 0.9853327  | 0.552 | 0.104 | 2.57E-156 | 14 | DTYMK    |
| 726 | 7.73E-159 | 1.37633264 | 0.739 | 0.214 | 2.61E-154 | 14 | CKS1B    |
| 727 | 6.56E-142 | 1.50017816 | 0.933 | 0.688 | 2.21E-137 | 14 | H2AFZ    |
| 728 | 1.68E-136 | 1.52295244 | 0.923 | 0.561 | 5.68E-132 | 14 | HMG2     |
| 729 | 6.53E-125 | 0.724427   | 0.546 | 0.116 | 2.20E-120 | 14 | SMC4     |
| 730 | 2.61E-115 | 1.05639982 | 0.571 | 0.146 | 8.81E-111 | 14 | PCNA     |
| 731 | 2.89E-113 | 1.49049613 | 0.917 | 0.667 | 9.73E-109 | 14 | TUBA1B   |
| 732 | 1.34E-107 | 1.24083162 | 0.503 | 0.122 | 4.53E-103 | 14 | HIST1H4C |
| 733 | 7.19E-94  | 1.43092998 | 0.847 | 0.502 | 2.42E-89  | 14 | TUBB     |
| 734 | 1.11E-83  | 0.96638819 | 0.902 | 0.73  | 3.72E-79  | 14 | HMGB1    |
| 735 | 3.28E-77  | 0.76158635 | 0.607 | 0.21  | 1.11E-72  | 14 | IDH2     |
| 736 | 4.26E-75  | 1.00621161 | 0.727 | 0.353 | 1.44E-70  | 14 | DUT      |
| 737 | 1.19E-71  | 0.81082568 | 0.675 | 0.265 | 4.00E-67  | 14 | CKS2     |
| 738 | 4.66E-62  | 0.79796024 | 0.742 | 0.379 | 1.57E-57  | 14 | NUCKS1   |
| 739 | 2.26E-61  | 0.8675534  | 0.776 | 0.439 | 7.61E-57  | 14 | H2AFV    |
| 740 | 1.59E-60  | 0.69867852 | 0.62  | 0.257 | 5.36E-56  | 14 | RPA3     |
| 741 | 9.79E-60  | 0.80853896 | 0.727 | 0.423 | 3.30E-55  | 14 | DEK      |
| 742 | 5.73E-59  | 0.93180839 | 0.816 | 0.456 | 1.93E-54  | 14 | HMGB2    |
| 743 | 4.43E-56  | 0.76518864 | 0.727 | 0.383 | 1.49E-51  | 14 | LSM4     |
| 744 | 1.43E-52  | 0.90052876 | 0.721 | 0.425 | 4.81E-48  | 14 | RANBP1   |



|     |            |            |       |       |           |                 |
|-----|------------|------------|-------|-------|-----------|-----------------|
| 745 | 2.67E-50   | 0.82530544 | 0.748 | 0.472 | 9.01E-46  | 14 ANP32B       |
| 746 | 5.41E-44   | 0.649005   | 0.801 | 0.533 | 1.82E-39  | 14 HMG1N1       |
| 747 | 6.66E-41   | 0.64644946 | 0.666 | 0.383 | 2.24E-36  | 14 SIVA1        |
| 748 | 5.34E-39   | 0.7415754  | 0.739 | 0.464 | 1.80E-34  | 14 YWHAH        |
| 749 | 3.57E-15   | 0.64028466 | 0.58  | 0.405 | 1.20E-10  | 14 FABP4        |
| 750 | 0.00058605 | 1.47214778 | 0.466 | 0.332 | 1         | 14 S100A8       |
| 751 | 0          | 5.67385307 | 0.656 | 0.062 | 0         | 15 IGKC         |
| 752 | 0          | 3.78492025 | 0.504 | 0.007 | 0         | 15 IGHM         |
| 753 | 0          | 2.26988655 | 0.648 | 0.002 | 0         | 15 CD79A        |
| 754 | 0          | 1.74634575 | 0.489 | 0.001 | 0         | 15 MS4A1        |
| 755 | 0          | 1.33921806 | 0.359 | 0.014 | 0         | 15 LY9          |
| 756 | 0          | 1.15793673 | 0.289 | 0.002 | 0         | 15 TNFRSF13C    |
| 757 | 0          | 1.14690372 | 0.322 | 0.014 | 0         | 15 BANK1        |
| 758 | 5.49E-271  | 3.60206794 | 0.285 | 0.014 | 1.85E-266 | 15 JCHAIN       |
| 759 | 9.27E-271  | 1.46489178 | 0.385 | 0.025 | 3.12E-266 | 15 CCR7         |
| 760 | 1.34E-253  | 0.8968858  | 0.3   | 0.016 | 4.52E-249 | 15 GNG7         |
| 761 | 8.32E-168  | 4.281094   | 0.322 | 0.029 | 2.80E-163 | 15 IGLC2        |
| 762 | 1.32E-75   | 4.48817786 | 0.256 | 0.039 | 4.44E-71  | 15 IGHA1        |
| 763 | 2.27E-75   | 1.19887161 | 0.352 | 0.069 | 7.65E-71  | 15 LTB          |
| 764 | 5.63E-70   | 0.80310141 | 0.974 | 0.941 | 1.90E-65  | 15 RPL3         |
| 765 | 1.03E-68   | 1.41481667 | 0.819 | 0.538 | 3.49E-64  | 15 HERPUD1      |
| 766 | 2.15E-65   | 0.71076805 | 0.989 | 0.972 | 7.26E-61  | 15 RPL13A       |
| 767 | 1.32E-63   | 1.25895266 | 0.815 | 0.455 | 4.44E-59  | 15 CXCR4        |
| 768 | 1.05E-58   | 0.76443959 | 0.974 | 0.954 | 3.54E-54  | 15 RPL18A       |
| 769 | 5.60E-58   | 1.01578481 | 0.633 | 0.248 | 1.89E-53  | 15 ISG20        |
| 770 | 1.59E-56   | 0.70091903 | 0.974 | 0.974 | 5.37E-52  | 15 RPL13        |
| 771 | 6.98E-55   | 0.71592971 | 0.974 | 0.967 | 2.35E-50  | 15 RPL21        |
| 772 | 5.25E-54   | 0.68787215 | 0.97  | 0.956 | 1.77E-49  | 15 RPS6         |
| 773 | 9.99E-54   | 0.69655149 | 0.948 | 0.928 | 3.37E-49  | 15 RPS8         |
| 774 | 5.60E-53   | 0.66365191 | 0.952 | 0.931 | 1.89E-48  | 15 RPL23A       |
| 775 | 1.17E-50   | 0.6756863  | 0.93  | 0.897 | 3.93E-46  | 15 RPS5         |
| 776 | 4.81E-47   | 0.8487006  | 0.278 | 0.066 | 1.62E-42  | 15 RP1-31316.12 |
| 777 | 3.19E-44   | 0.70264069 | 0.967 | 0.963 | 1.08E-39  | 15 RPS27        |
| 778 | 3.00E-43   | 0.70275626 | 0.915 | 0.808 | 1.01E-38  | 15 RPL4         |
| 779 | 1.35E-42   | 0.9344286  | 0.474 | 0.177 | 4.56E-38  | 15 RHOF         |
| 780 | 3.12E-42   | 0.76311977 | 0.859 | 0.763 | 1.05E-37  | 15 EEF1B2       |
| 781 | 6.71E-39   | 1.12473564 | 0.652 | 0.422 | 2.26E-34  | 15 CD37         |
| 782 | 4.72E-38   | 0.96008867 | 0.604 | 0.302 | 1.59E-33  | 15 BIRC3        |
| 783 | 3.52E-36   | 1.41724438 | 0.552 | 0.329 | 1.18E-31  | 15 CD83         |
| 784 | 3.14E-35   | 0.69601867 | 0.83  | 0.675 | 1.06E-30  | 15 TSC22D3      |
| 785 | 3.76E-35   | 1.03020026 | 0.67  | 0.434 | 1.27E-30  | 15 EZR          |
| 786 | 3.74E-33   | 0.7074501  | 0.822 | 0.714 | 1.26E-28  | 15 EEF2         |
| 787 | 1.45E-32   | 0.74463747 | 0.763 | 0.594 | 4.88E-28  | 15 GLTSCR2      |
| 788 | 2.54E-28   | 0.86919022 | 0.841 | 0.838 | 8.56E-24  | 15 BTG1         |
| 789 | 1.82E-21   | 0.8437745  | 0.541 | 0.339 | 6.13E-17  | 15 ZNF331       |
| 790 | 1.91E-20   | 0.75791105 | 0.407 | 0.209 | 6.43E-16  | 15 SMCHD1       |
| 791 | 1.97E-18   | 0.88302304 | 0.304 | 0.137 | 6.63E-14  | 15 PMAIP1       |
| 792 | 3.25E-17   | 0.6597632  | 0.637 | 0.454 | 1.09E-12  | 15 HLA-DQB1     |
| 793 | 2.00E-16   | 0.66298147 | 0.341 | 0.174 | 6.75E-12  | 15 VPS37B       |
| 794 | 4.30E-16   | 0.83994028 | 0.53  | 0.388 | 1.45E-11  | 15 YPEL5        |

|     |            |            |       |       |           |             |
|-----|------------|------------|-------|-------|-----------|-------------|
| 795 | 4.44E-14   | 0.67841099 | 0.496 | 0.348 | 1.50E-09  | 15 HLA-DQA1 |
| 796 | 7.59E-10   | 0.6802911  | 0.6   | 0.54  | 2.56E-05  | 15 RPL17    |
| 797 | 2.06E-09   | 0.7134211  | 0.478 | 0.375 | 6.96E-05  | 15 NR4A2    |
| 798 | 2.13E-08   | 0.84193751 | 0.348 | 0.266 | 0.0007162 | 15 IRF8     |
| 799 | 0.00638368 | 0.65779797 | 0.319 | 0.293 | 1         | 15 BCAS2    |
| 800 | 0.00639262 | 0.69891223 | 0.263 | 0.233 | 1         | 15 CHPT1    |

**Table S3.** Top 50 most highly upregulated genes in each cluster in healthy and IPF combined analysis (Figure 2), comparing each cluster with all other clusters (FindAllMarkers function Seurat). P-values as indicated; pct.1=percent of cells expressing the gene in the cluster of interest; pct.2=percent of all other cells expressing the gene of interest (pct refers to the percent of cells expressing at least one transcript (UMI)).

| Cluster | p_val | avg_logFC | pct.1 | pct.2 | p_val_adj | cluster | gene         |
|---------|-------|-----------|-------|-------|-----------|---------|--------------|
| 1       | 0     | 2.575189  | 0.935 | 0.172 | 0         | 0       | FABP4        |
| 2       | 0     | 2.065742  | 0.99  | 0.288 | 0         | 0       | C1QB         |
| 3       | 0     | 1.970049  | 0.989 | 0.299 | 0         | 0       | C1QA         |
| 4       | 0     | 1.59832   | 0.974 | 0.293 | 0         | 0       | FBP1         |
| 5       | 0     | 1.55897   | 0.954 | 0.207 | 0         | 0       | C1QC         |
| 6       | 0     | 1.544235  | 0.98  | 0.438 | 0         | 0       | CD52         |
| 7       | 0     | 1.474363  | 0.943 | 0.166 | 0         | 0       | MCEMP1       |
| 8       | 0     | 1.451863  | 0.994 | 0.381 | 0         | 0       | APOC1        |
| 9       | 0     | 1.417984  | 0.822 | 0.082 | 0         | 0       | INHBA        |
| 10      | 0     | 1.315554  | 0.845 | 0.062 | 0         | 0       | RP11-598F7.3 |
| 11      | 0     | 1.301823  | 0.982 | 0.401 | 0         | 0       | ALOX5AP      |
| 12      | 0     | 1.274144  | 0.953 | 0.284 | 0         | 0       | SERPINA1     |
| 13      | 0     | 1.230772  | 0.94  | 0.23  | 0         | 0       | VSIG4        |
| 14      | 0     | 1.225395  | 0.954 | 0.21  | 0         | 0       | MSR1         |
| 15      | 0     | 1.221516  | 0.966 | 0.311 | 0         | 0       | GCHFR        |
| 16      | 0     | 1.197444  | 1     | 0.99  | 0         | 0       | FTL          |
| 17      | 0     | 1.192911  | 0.974 | 0.5   | 0         | 0       | GRN          |
| 18      | 0     | 1.192043  | 0.976 | 0.311 | 0         | 0       | ACP5         |
| 19      | 0     | 1.158762  | 0.923 | 0.188 | 0         | 0       | TREM1        |
| 20      | 0     | 1.157352  | 0.972 | 0.335 | 0         | 0       | CD68         |
| 21      | 0     | 1.140119  | 0.951 | 0.236 | 0         | 0       | MARCO        |
| 22      | 0     | 1.109917  | 0.947 | 0.244 | 0         | 0       | SPI1         |
| 23      | 0     | 1.105316  | 0.645 | 0.047 | 0         | 0       | RBP4         |
| 24      | 0     | 1.100955  | 0.99  | 0.388 | 0         | 0       | LYZ          |
| 25      | 0     | 1.098315  | 0.987 | 0.626 | 0         | 0       | TSPO         |
| 26      | 0     | 1.088272  | 0.997 | 0.677 | 0         | 0       | HLA-DRA      |
| 27      | 0     | 1.073642  | 0.979 | 0.292 | 0         | 0       | MS4A7        |
| 28      | 0     | 1.065627  | 0.958 | 0.25  | 0         | 0       | SNX10        |
| 29      | 0     | 1.058387  | 0.994 | 0.47  | 0         | 0       | TYROBP       |
| 30      | 0     | 1.022437  | 0.952 | 0.414 | 0         | 0       | ALDH2        |
| 31      | 0     | 1.017573  | 0.994 | 0.748 | 0         | 0       | CD74         |
| 32      | 0     | 1.017361  | 0.475 | 0.089 | 0         | 0       | FABP3        |
| 33      | 0     | 1.012983  | 0.709 | 0.144 | 0         | 0       | AKR1C3       |
| 34      | 0     | 1.006968  | 0.953 | 0.301 | 0         | 0       | CXCL16       |
| 35      | 0     | 1.005456  | 0.967 | 0.403 | 0         | 0       | GLRX         |
| 36      | 0     | 0.997917  | 0.744 | 0.103 | 0         | 0       | MIR3945HG    |
| 37      | 0     | 0.98111   | 0.968 | 0.318 | 0         | 0       | C1orf162     |

|    |   |          |       |       |   |            |
|----|---|----------|-------|-------|---|------------|
| 38 | 0 | 0.980668 | 0.938 | 0.23  | 0 | 0 MRC1     |
| 39 | 0 | 0.968695 | 0.962 | 0.412 | 0 | 0 CTSC     |
| 40 | 0 | 0.95926  | 0.994 | 0.609 | 0 | 0 CTSD     |
| 41 | 0 | 0.950098 | 0.982 | 0.564 | 0 | 0 NOP10    |
| 42 | 0 | 0.946318 | 0.989 | 0.578 | 0 | 0 HLA-DPA1 |
| 43 | 0 | 0.94246  | 0.848 | 0.145 | 0 | 0 LPL      |
| 44 | 0 | 0.932042 | 0.943 | 0.346 | 0 | 0 PYCARD   |
| 45 | 0 | 0.919535 | 0.981 | 0.582 | 0 | 0 HLA-DRB1 |
| 46 | 0 | 0.904939 | 0.968 | 0.447 | 0 | 0 HLA-DQB1 |
| 47 | 0 | 0.898732 | 0.907 | 0.219 | 0 | 0 CYP27A1  |
| 48 | 0 | 0.89098  | 0.873 | 0.169 | 0 | 0 ALOX5    |
| 49 | 0 | 0.8882   | 0.737 | 0.046 | 0 | 0 PCOLCE2  |
| 50 | 0 | 0.870075 | 0.931 | 0.27  | 0 | 0 CSTA     |
| 51 | 0 | 2.689071 | 0.514 | 0.092 | 0 | 1 SPP1     |
| 52 | 0 | 1.854658 | 0.766 | 0.354 | 0 | 1 APOE     |
| 53 | 0 | 1.772461 | 0.676 | 0.281 | 0 | 1 CCL18    |
| 54 | 0 | 1.591557 | 0.98  | 0.503 | 0 | 1 CTSB     |
| 55 | 0 | 1.587022 | 0.876 | 0.26  | 0 | 1 GPNMB    |
| 56 | 0 | 1.539034 | 0.909 | 0.398 | 0 | 1 CTSL     |
| 57 | 0 | 1.431186 | 0.984 | 0.584 | 0 | 1 CTSD     |
| 58 | 0 | 1.397726 | 0.613 | 0.204 | 0 | 1 LGMN     |
| 59 | 0 | 1.370701 | 1     | 0.99  | 0 | 1 FTL      |
| 60 | 0 | 1.318008 | 0.863 | 0.368 | 0 | 1 APOC1    |
| 61 | 0 | 1.294624 | 0.983 | 0.657 | 0 | 1 CSTB     |
| 62 | 0 | 1.248422 | 0.84  | 0.336 | 0 | 1 CTSZ     |
| 63 | 0 | 1.188911 | 0.916 | 0.445 | 0 | 1 FABP5    |
| 64 | 0 | 1.186697 | 0.982 | 0.626 | 0 | 1 PSAP     |
| 65 | 0 | 1.152242 | 0.789 | 0.222 | 0 | 1 MARCO    |
| 66 | 0 | 1.150342 | 0.927 | 0.299 | 0 | 1 CD68     |
| 67 | 0 | 1.110908 | 0.988 | 0.661 | 0 | 1 GPX1     |
| 68 | 0 | 1.091306 | 0.874 | 0.287 | 0 | 1 ACP5     |
| 69 | 0 | 1.069091 | 0.765 | 0.202 | 0 | 1 MS4A4A   |
| 70 | 0 | 1.042793 | 0.986 | 0.648 | 0 | 1 LGALS1   |
| 71 | 0 | 1.036099 | 0.426 | 0.153 | 0 | 1 CCL20    |
| 72 | 0 | 1.021409 | 0.992 | 0.433 | 0 | 1 TYROBP   |
| 73 | 0 | 1.017547 | 0.986 | 0.406 | 0 | 1 FCER1G   |
| 74 | 0 | 1.002343 | 0.816 | 0.227 | 0 | 1 CD163    |
| 75 | 0 | 0.985551 | 0.632 | 0.17  | 0 | 1 MS4A6A   |
| 76 | 0 | 0.98187  | 0.622 | 0.148 | 0 | 1 TREM2    |
| 77 | 0 | 0.966808 | 0.549 | 0.057 | 0 | 1 PLA2G7   |
| 78 | 0 | 0.952167 | 0.722 | 0.283 | 0 | 1 LIPA     |
| 79 | 0 | 0.941465 | 0.899 | 0.261 | 0 | 1 MS4A7    |
| 80 | 0 | 0.940627 | 0.914 | 0.47  | 0 | 1 BRI3     |

|     |   |          |       |       |   |                |
|-----|---|----------|-------|-------|---|----------------|
| 81  | 0 | 0.93004  | 0.96  | 0.647 | 0 | 1 LGALS3       |
| 82  | 0 | 0.924265 | 0.782 | 0.265 | 0 | 1 DAB2         |
| 83  | 0 | 0.920806 | 0.932 | 0.489 | 0 | 1 AP2S1        |
| 84  | 0 | 0.912031 | 0.744 | 0.225 | 0 | 1 MRC1         |
| 85  | 0 | 0.892056 | 1     | 0.99  | 0 | 1 FTH1         |
| 86  | 0 | 0.873376 | 0.865 | 0.349 | 0 | 1 CAPG         |
| 87  | 0 | 0.871927 | 0.928 | 0.451 | 0 | 1 CTSS         |
| 88  | 0 | 0.855624 | 0.919 | 0.463 | 0 | 1 TYMP         |
| 89  | 0 | 0.853534 | 0.98  | 0.751 | 0 | 1 SH3BGRL3     |
| 90  | 0 | 0.845353 | 0.913 | 0.298 | 0 | 1 AIF1         |
| 91  | 0 | 0.841784 | 0.729 | 0.319 | 0 | 1 GCHFR        |
| 92  | 0 | 0.84129  | 0.952 | 0.57  | 0 | 1 ATP6V1F      |
| 93  | 0 | 0.837245 | 0.704 | 0.191 | 0 | 1 CYBB         |
| 94  | 0 | 0.832164 | 0.904 | 0.46  | 0 | 1 H2AFY        |
| 95  | 0 | 0.828227 | 0.905 | 0.498 | 0 | 1 EMP3         |
| 96  | 0 | 0.826696 | 0.765 | 0.22  | 0 | 1 VSIG4        |
| 97  | 0 | 0.817142 | 0.54  | 0.154 | 0 | 1 SDC2         |
| 98  | 0 | 0.816062 | 0.928 | 0.538 | 0 | 1 ATP6V0B      |
| 99  | 0 | 0.811402 | 0.986 | 0.675 | 0 | 1 NPC2         |
| 100 | 0 | 0.79749  | 0.625 | 0.21  | 0 | 1 TGFBI        |
| 101 | 0 | 1.959538 | 0.81  | 0.244 | 0 | 2 IL7R         |
| 102 | 0 | 1.862547 | 0.958 | 0.398 | 0 | 2 CXCR4        |
| 103 | 0 | 1.70519  | 0.947 | 0.674 | 0 | 2 ZFP36L2      |
| 104 | 0 | 1.672995 | 0.824 | 0.329 | 0 | 2 RGS1         |
| 105 | 0 | 1.606779 | 0.525 | 0.097 | 0 | 2 BATF         |
| 106 | 0 | 1.577995 | 0.608 | 0.054 | 0 | 2 CD2          |
| 107 | 0 | 1.577786 | 0.567 | 0.043 | 0 | 2 TRAC         |
| 108 | 0 | 1.455278 | 0.609 | 0.061 | 0 | 2 CD3D         |
| 109 | 0 | 1.438303 | 0.979 | 0.848 | 0 | 2 BTG1         |
| 110 | 0 | 1.414919 | 0.411 | 0.031 | 0 | 2 GPR171       |
| 111 | 0 | 1.408484 | 0.938 | 0.707 | 0 | 2 TSC22D3      |
| 112 | 0 | 1.349483 | 0.432 | 0.114 | 0 | 2 RP11-138A9.2 |
| 113 | 0 | 1.315332 | 0.31  | 0.052 | 0 | 2 KLRB1        |
| 114 | 0 | 1.309958 | 0.621 | 0.263 | 0 | 2 STK4         |
| 115 | 0 | 1.308785 | 0.367 | 0.05  | 0 | 2 LTB          |
| 116 | 0 | 1.295712 | 0.432 | 0.043 | 0 | 2 TRBC2        |
| 117 | 0 | 1.295084 | 0.669 | 0.311 | 0 | 2 CYTIP        |
| 118 | 0 | 1.290988 | 0.373 | 0.044 | 0 | 2 TRBC1        |
| 119 | 0 | 1.284673 | 0.674 | 0.4   | 0 | 2 LEPROTL1     |
| 120 | 0 | 1.283904 | 0.514 | 0.213 | 0 | 2 RP11-138A9.1 |
| 121 | 0 | 1.246367 | 0.788 | 0.593 | 0 | 2 TXNIP        |
| 122 | 0 | 1.234374 | 0.458 | 0.141 | 0 | 2 RORA         |
| 123 | 0 | 1.227983 | 0.901 | 0.749 | 0 | 2 SARAF        |

|     |           |          |       |       |           |   |            |
|-----|-----------|----------|-------|-------|-----------|---|------------|
| 124 | 0         | 1.210037 | 0.466 | 0.18  | 0         | 2 | AIM1       |
| 125 | 0         | 1.167131 | 0.437 | 0.136 | 0         | 2 | PRDM1      |
| 126 | 0         | 1.158549 | 0.427 | 0.028 | 0         | 2 | CD3E       |
| 127 | 0         | 1.124296 | 0.67  | 0.378 | 0         | 2 | PTPRC      |
| 128 | 0         | 1.112049 | 0.343 | 0.015 | 0         | 2 | TRAT1      |
| 129 | 0         | 1.054597 | 0.493 | 0.153 | 0         | 2 | RHOH       |
| 130 | 0         | 1.039885 | 0.385 | 0.174 | 0         | 2 | DUSP4      |
| 131 | 0         | 1.03155  | 0.37  | 0.037 | 0         | 2 | SPOCK2     |
| 132 | 0         | 1.01946  | 0.482 | 0.204 | 0         | 2 | SOCS1      |
| 133 | 0         | 1.019177 | 0.448 | 0.17  | 0         | 2 | CNOT6L     |
| 134 | 0         | 1.010396 | 0.342 | 0.067 | 0         | 2 | CLEC2D     |
| 135 | 0         | 0.999405 | 0.54  | 0.197 | 0         | 2 | CD48       |
| 136 | 0         | 0.996372 | 0.33  | 0.073 | 0         | 2 | AC016831.7 |
| 137 | 0         | 0.983799 | 0.622 | 0.224 | 0         | 2 | IL32       |
| 138 | 0         | 0.982153 | 0.713 | 0.49  | 0         | 2 | CREM       |
| 139 | 0         | 0.97676  | 0.656 | 0.337 | 0         | 2 | BIRC3      |
| 140 | 0         | 0.942243 | 0.405 | 0.158 | 0         | 2 | PIK3IP1    |
| 141 | 0         | 0.940113 | 0.401 | 0.117 | 0         | 2 | TUBA4A     |
| 142 | 0         | 0.940067 | 0.281 | 0.026 | 0         | 2 | CD96       |
| 143 | 0         | 0.9328   | 0.999 | 0.975 | 0         | 2 | RPS27      |
| 144 | 0         | 0.931184 | 0.423 | 0.138 | 0         | 2 | FYN        |
| 145 | 0         | 0.918492 | 0.508 | 0.212 | 0         | 2 | CORO1A     |
| 146 | 0         | 0.906819 | 0.353 | 0.076 | 0         | 2 | ACAP1      |
| 147 | 2.30E-280 | 0.954345 | 0.442 | 0.262 | 7.76E-276 | 2 | FYB        |
| 148 | 2.76E-267 | 1.13544  | 0.571 | 0.449 | 9.29E-263 | 2 | HMGB2      |
| 149 | 5.78E-231 | 1.127376 | 0.427 | 0.282 | 1.95E-226 | 2 | NR3C1      |
| 150 | 2.72E-83  | 0.945938 | 0.438 | 0.435 | 9.18E-79  | 2 | RBPJ       |
| 151 | 0         | 3.202178 | 0.646 | 0.033 | 0         | 3 | ACKR1      |
| 152 | 0         | 2.803955 | 0.854 | 0.053 | 0         | 3 | CLDN5      |
| 153 | 0         | 2.72962  | 0.277 | 0.034 | 0         | 3 | CXCL10     |
| 154 | 0         | 2.505467 | 0.355 | 0.023 | 0         | 3 | FCN3       |
| 155 | 0         | 2.396001 | 0.854 | 0.177 | 0         | 3 | TM4SF1     |
| 156 | 0         | 2.307537 | 0.951 | 0.231 | 0         | 3 | IFI27      |
| 157 | 0         | 2.28435  | 0.735 | 0.024 | 0         | 3 | VWF        |
| 158 | 0         | 2.109211 | 0.861 | 0.3   | 0         | 3 | EPAS1      |
| 159 | 0         | 2.095602 | 0.434 | 0.078 | 0         | 3 | IL6        |
| 160 | 0         | 2.071602 | 0.806 | 0.139 | 0         | 3 | SPARCL1    |
| 161 | 0         | 2.070508 | 0.757 | 0.053 | 0         | 3 | AQP1       |
| 162 | 0         | 2.041506 | 0.636 | 0.203 | 0         | 3 | CCL2       |
| 163 | 0         | 2.020525 | 0.574 | 0.14  | 0         | 3 | MT1M       |
| 164 | 0         | 2.010088 | 0.747 | 0.13  | 0         | 3 | HYAL2      |
| 165 | 0         | 1.929343 | 0.734 | 0.038 | 0         | 3 | RAMP2      |
| 166 | 0         | 1.859124 | 0.408 | 0.162 | 0         | 3 | GBP1       |

|     |   |          |       |       |   |            |
|-----|---|----------|-------|-------|---|------------|
| 167 | 0 | 1.820067 | 0.683 | 0.103 | 0 | 3 PRSS23   |
| 168 | 0 | 1.816875 | 0.636 | 0.016 | 0 | 3 RAMP3    |
| 169 | 0 | 1.77149  | 0.73  | 0.25  | 0 | 3 ICAM1    |
| 170 | 0 | 1.766799 | 0.582 | 0.028 | 0 | 3 ADAMTS9  |
| 171 | 0 | 1.751551 | 0.356 | 0.076 | 0 | 3 MT1A     |
| 172 | 0 | 1.746894 | 0.772 | 0.109 | 0 | 3 GNG11    |
| 173 | 0 | 1.736632 | 0.792 | 0.251 | 0 | 3 PECAM1   |
| 174 | 0 | 1.723996 | 0.464 | 0.02  | 0 | 3 VCAM1    |
| 175 | 0 | 1.721291 | 0.859 | 0.513 | 0 | 3 SOCS3    |
| 176 | 0 | 1.719862 | 0.849 | 0.394 | 0 | 3 PDLIM1   |
| 177 | 0 | 1.713007 | 0.394 | 0.007 | 0 | 3 SELE     |
| 178 | 0 | 1.702128 | 0.949 | 0.551 | 0 | 3 IFITM3   |
| 179 | 0 | 1.679003 | 0.733 | 0.332 | 0 | 3 EMP1     |
| 180 | 0 | 1.670177 | 0.734 | 0.102 | 0 | 3 NPDC1    |
| 181 | 0 | 1.66091  | 0.781 | 0.418 | 0 | 3 MT1X     |
| 182 | 0 | 1.659621 | 0.595 | 0.019 | 0 | 3 FAM107A  |
| 183 | 0 | 1.631279 | 0.455 | 0.036 | 0 | 3 CX3CL1   |
| 184 | 0 | 1.611171 | 0.314 | 0.019 | 0 | 3 CSF3     |
| 185 | 0 | 1.562765 | 0.548 | 0.15  | 0 | 3 TNFSF10  |
| 186 | 0 | 1.562105 | 0.825 | 0.334 | 0 | 3 IGFBP7   |
| 187 | 0 | 1.537056 | 0.433 | 0.084 | 0 | 3 C10orf10 |
| 188 | 0 | 1.536595 | 0.779 | 0.152 | 0 | 3 CAV1     |
| 189 | 0 | 1.524014 | 0.954 | 0.762 | 0 | 3 MT2A     |
| 190 | 0 | 1.513182 | 0.597 | 0.014 | 0 | 3 CLEC14A  |
| 191 | 0 | 1.5131   | 0.724 | 0.161 | 0 | 3 TIMP3    |
| 192 | 0 | 1.468971 | 0.577 | 0.071 | 0 | 3 EGFL7    |
| 193 | 0 | 1.441647 | 0.749 | 0.207 | 0 | 3 NNMT     |
| 194 | 0 | 1.420419 | 0.531 | 0.013 | 0 | 3 SLCO2A1  |
| 195 | 0 | 1.417793 | 0.408 | 0.075 | 0 | 3 GBP4     |
| 196 | 0 | 1.411765 | 0.581 | 0.027 | 0 | 3 CALCRL   |
| 197 | 0 | 1.395058 | 0.58  | 0.139 | 0 | 3 C8orf4   |
| 198 | 0 | 1.382946 | 0.668 | 0.139 | 0 | 3 TCF4     |
| 199 | 0 | 1.369098 | 0.345 | 0.069 | 0 | 3 SERPINE1 |
| 200 | 0 | 1.368953 | 0.872 | 0.56  | 0 | 3 CD59     |
| 201 | 0 | 2.500895 | 0.888 | 0.082 | 0 | 4 CCL5     |
| 202 | 0 | 2.226725 | 0.888 | 0.191 | 0 | 4 CCL4     |
| 203 | 0 | 2.116498 | 0.768 | 0.07  | 0 | 4 NKG7     |
| 204 | 0 | 2.023487 | 0.461 | 0.05  | 0 | 4 GNLY     |
| 205 | 0 | 1.960822 | 0.671 | 0.053 | 0 | 4 GZMB     |
| 206 | 0 | 1.852869 | 0.73  | 0.088 | 0 | 4 CST7     |
| 207 | 0 | 1.794033 | 0.65  | 0.072 | 0 | 4 CD7      |
| 208 | 0 | 1.777633 | 0.528 | 0.034 | 0 | 4 KLRD1    |
| 209 | 0 | 1.745092 | 0.939 | 0.411 | 0 | 4 CXCR4    |

|     |           |          |       |       |           |   |          |
|-----|-----------|----------|-------|-------|-----------|---|----------|
| 210 | 0         | 1.706607 | 0.428 | 0.01  | 0         | 4 | CD8A     |
| 211 | 0         | 1.705075 | 0.293 | 0.01  | 0         | 4 | GZMK     |
| 212 | 0         | 1.68462  | 0.735 | 0.242 | 0         | 4 | DUSP2    |
| 213 | 0         | 1.661368 | 0.527 | 0.04  | 0         | 4 | GZMA     |
| 214 | 0         | 1.637208 | 0.513 | 0.032 | 0         | 4 | PRF1     |
| 215 | 0         | 1.621945 | 0.427 | 0.023 | 0         | 4 | GZMH     |
| 216 | 0         | 1.59207  | 0.566 | 0.076 | 0         | 4 | CD3D     |
| 217 | 0         | 1.446458 | 0.334 | 0.056 | 0         | 4 | KLRB1    |
| 218 | 0         | 1.427551 | 0.576 | 0.133 | 0         | 4 | SYTL3    |
| 219 | 0         | 1.376858 | 0.676 | 0.24  | 0         | 4 | ISG20    |
| 220 | 0         | 1.346899 | 0.371 | 0.111 | 0         | 4 | CCL4L2   |
| 221 | 0         | 1.324066 | 0.41  | 0.049 | 0         | 4 | TRBC1    |
| 222 | 0         | 1.301628 | 0.391 | 0.07  | 0         | 4 | CTSW     |
| 223 | 0         | 1.299599 | 0.894 | 0.684 | 0         | 4 | ZFP36L2  |
| 224 | 0         | 1.298246 | 0.487 | 0.074 | 0         | 4 | CD2      |
| 225 | 0         | 1.288778 | 0.453 | 0.12  | 0         | 4 | TUBA4A   |
| 226 | 0         | 1.280116 | 0.683 | 0.384 | 0         | 4 | PTPRC    |
| 227 | 0         | 1.278424 | 0.42  | 0.053 | 0         | 4 | TRBC2    |
| 228 | 0         | 1.27819  | 0.433 | 0.063 | 0         | 4 | TRAC     |
| 229 | 0         | 1.264025 | 0.303 | 0.005 | 0         | 4 | CD8B     |
| 230 | 0         | 1.223549 | 0.496 | 0.139 | 0         | 4 | FYN      |
| 231 | 0         | 1.111438 | 0.37  | 0.077 | 0         | 4 | RUNX3    |
| 232 | 0         | 1.101676 | 0.957 | 0.852 | 0         | 4 | BTG1     |
| 233 | 0         | 1.10081  | 0.34  | 0.03  | 0         | 4 | GZMM     |
| 234 | 0         | 1.082556 | 0.616 | 0.233 | 0         | 4 | IL32     |
| 235 | 0         | 1.072177 | 0.704 | 0.496 | 0         | 4 | CREM     |
| 236 | 0         | 1.062743 | 0.526 | 0.277 | 0         | 4 | STK4     |
| 237 | 0         | 1.062706 | 0.494 | 0.22  | 0         | 4 | CORO1A   |
| 238 | 0         | 1.060277 | 0.865 | 0.717 | 0         | 4 | TSC22D3  |
| 239 | 0         | 1.044334 | 0.412 | 0.178 | 0         | 4 | CNOT6L   |
| 240 | 0         | 1.034538 | 0.555 | 0.326 | 0         | 4 | CYTIP    |
| 241 | 0         | 1.013806 | 0.331 | 0.044 | 0         | 4 | CD3E     |
| 242 | 0         | 1.010426 | 0.328 | 0.074 | 0         | 4 | CLEC2D   |
| 243 | 0         | 0.964197 | 0.292 | 0.064 | 0         | 4 | PTPN7    |
| 244 | 0         | 0.953208 | 0.483 | 0.208 | 0         | 4 | CD48     |
| 245 | 0         | 0.94896  | 0.296 | 0.039 | 0         | 4 | CD247    |
| 246 | 2.97E-294 | 1.120062 | 0.534 | 0.339 | 1.00E-289 | 4 | PPP2R5C  |
| 247 | 4.26E-272 | 0.952317 | 0.673 | 0.551 | 1.44E-267 | 4 | ID2      |
| 248 | 2.27E-222 | 1.061857 | 0.549 | 0.414 | 7.65E-218 | 4 | LEPROTL1 |
| 249 | 3.38E-182 | 0.991651 | 0.365 | 0.197 | 1.14E-177 | 4 | PIK3R1   |
| 250 | 5.34E-39  | 1.235969 | 0.323 | 0.293 | 1.80E-34  | 4 | CMC1     |
| 251 | 0         | 4.060853 | 0.997 | 0.104 | 0         | 5 | DCN      |
| 252 | 0         | 3.853383 | 0.971 | 0.057 | 0         | 5 | LUM      |



|     |   |          |       |       |   |            |
|-----|---|----------|-------|-------|---|------------|
| 253 | 0 | 3.489175 | 0.955 | 0.048 | 0 | 5 FBLN1    |
| 254 | 0 | 3.377072 | 0.835 | 0.046 | 0 | 5 COL1A1   |
| 255 | 0 | 3.363631 | 0.926 | 0.048 | 0 | 5 COL1A2   |
| 256 | 0 | 3.354759 | 0.833 | 0.042 | 0 | 5 COL3A1   |
| 257 | 0 | 2.889382 | 0.626 | 0.014 | 0 | 5 SFRP2    |
| 258 | 0 | 2.864914 | 0.788 | 0.072 | 0 | 5 PTGDS    |
| 259 | 0 | 2.659663 | 0.989 | 0.269 | 0 | 5 MGP      |
| 260 | 0 | 2.611553 | 0.911 | 0.263 | 0 | 5 A2M      |
| 261 | 0 | 2.595555 | 0.952 | 0.065 | 0 | 5 C1S      |
| 262 | 0 | 2.585958 | 0.793 | 0.329 | 0 | 5 CFD      |
| 263 | 0 | 2.451187 | 0.902 | 0.026 | 0 | 5 MFAP4    |
| 264 | 0 | 2.42983  | 0.902 | 0.148 | 0 | 5 SERPINF1 |
| 265 | 0 | 2.392631 | 0.902 | 0.047 | 0 | 5 MMP2     |
| 266 | 0 | 2.378088 | 0.895 | 0.227 | 0 | 5 SPARC    |
| 267 | 0 | 2.355201 | 0.91  | 0.07  | 0 | 5 RARRES2  |
| 268 | 0 | 2.343249 | 0.947 | 0.099 | 0 | 5 C1R      |
| 269 | 0 | 2.304875 | 0.93  | 0.057 | 0 | 5 COL6A2   |
| 270 | 0 | 2.276207 | 0.822 | 0.132 | 0 | 5 CYR61    |
| 271 | 0 | 2.232366 | 0.909 | 0.077 | 0 | 5 NBL1     |
| 272 | 0 | 2.188935 | 0.706 | 0.02  | 0 | 5 ADH1B    |
| 273 | 0 | 2.170129 | 0.767 | 0.055 | 0 | 5 CCDC80   |
| 274 | 0 | 2.133325 | 0.889 | 0.055 | 0 | 5 COL6A1   |
| 275 | 0 | 2.121231 | 0.823 | 0.017 | 0 | 5 COL6A3   |
| 276 | 0 | 2.052813 | 0.664 | 0.058 | 0 | 5 IGFBP6   |
| 277 | 0 | 2.049783 | 0.848 | 0.187 | 0 | 5 IGFBP4   |
| 278 | 0 | 2.015029 | 0.816 | 0.05  | 0 | 5 BGN      |
| 279 | 0 | 1.976378 | 0.61  | 0.045 | 0 | 5 APOD     |
| 280 | 0 | 1.91574  | 0.813 | 0.082 | 0 | 5 CFH      |
| 281 | 0 | 1.895284 | 0.966 | 0.635 | 0 | 5 TIMP1    |
| 282 | 0 | 1.890995 | 0.83  | 0.032 | 0 | 5 PCOLCE   |
| 283 | 0 | 1.874766 | 0.548 | 0.064 | 0 | 5 IGFBP5   |
| 284 | 0 | 1.85947  | 0.427 | 0.006 | 0 | 5 SFRP4    |
| 285 | 0 | 1.852663 | 0.695 | 0.106 | 0 | 5 CTGF     |
| 286 | 0 | 1.803879 | 0.668 | 0.054 | 0 | 5 C7       |
| 287 | 0 | 1.770636 | 0.63  | 0.091 | 0 | 5 RARRES1  |
| 288 | 0 | 1.732492 | 0.745 | 0.019 | 0 | 5 MEG3     |
| 289 | 0 | 1.72828  | 0.889 | 0.22  | 0 | 5 SEPP1    |
| 290 | 0 | 1.727997 | 0.815 | 0.053 | 0 | 5 PLAC9    |
| 291 | 0 | 1.726545 | 0.595 | 0.007 | 0 | 5 DPT      |
| 292 | 0 | 1.719354 | 0.933 | 0.225 | 0 | 5 NNMT     |
| 293 | 0 | 1.70122  | 0.701 | 0.019 | 0 | 5 TCF21    |
| 294 | 0 | 1.674554 | 0.459 | 0.009 | 0 | 5 ASPN     |
| 295 | 0 | 1.661608 | 0.883 | 0.183 | 0 | 5 TIMP3    |

|     |   |          |       |       |   |                 |
|-----|---|----------|-------|-------|---|-----------------|
| 296 | 0 | 1.619652 | 0.806 | 0.067 | 0 | 5 FSTL1         |
| 297 | 0 | 1.615283 | 0.91  | 0.291 | 0 | 5 FN1           |
| 298 | 0 | 1.609781 | 0.432 | 0.07  | 0 | 5 POSTN         |
| 299 | 0 | 1.607107 | 0.935 | 0.305 | 0 | 5 SERPING1      |
| 300 | 0 | 1.600202 | 0.893 | 0.53  | 0 | 5 GSN           |
| 301 | 0 | 3.120623 | 0.817 | 0.24  | 0 | 6 S100A8        |
| 302 | 0 | 2.806273 | 0.91  | 0.408 | 0 | 6 S100A9        |
| 303 | 0 | 2.477938 | 0.663 | 0.169 | 0 | 6 IL1B          |
| 304 | 0 | 2.41181  | 0.689 | 0.171 | 0 | 6 GOS2          |
| 305 | 0 | 2.406283 | 0.887 | 0.294 | 0 | 6 THBS1         |
| 306 | 0 | 2.095252 | 0.425 | 0.012 | 0 | 6 S100A12       |
| 307 | 0 | 2.091096 | 0.738 | 0.167 | 0 | 6 EREG          |
| 308 | 0 | 2.083302 | 0.368 | 0.023 | 0 | 6 SERPINB2      |
| 309 | 0 | 2.061598 | 0.738 | 0.054 | 0 | 6 FCN1          |
| 310 | 0 | 1.766677 | 0.971 | 0.595 | 0 | 6 NAMPT         |
| 311 | 0 | 1.750411 | 0.679 | 0.188 | 0 | 6 VCAN          |
| 312 | 0 | 1.709974 | 0.899 | 0.435 | 0 | 6 PLAUR         |
| 313 | 0 | 1.705898 | 0.617 | 0.308 | 0 | 6 CXCL8         |
| 314 | 0 | 1.591329 | 0.707 | 0.28  | 0 | 6 RP11-1143G9.4 |
| 315 | 0 | 1.527822 | 0.935 | 0.608 | 0 | 6 SOD2          |
| 316 | 0 | 1.480443 | 0.954 | 0.439 | 0 | 6 LYZ           |
| 317 | 0 | 1.448046 | 0.908 | 0.387 | 0 | 6 AIF1          |
| 318 | 0 | 1.441011 | 0.556 | 0.038 | 0 | 6 CD300E        |
| 319 | 0 | 1.422097 | 0.843 | 0.347 | 0 | 6 LST1          |
| 320 | 0 | 1.418443 | 0.767 | 0.293 | 0 | 6 C5AR1         |
| 321 | 0 | 1.409248 | 0.997 | 0.853 | 0 | 6 SAT1          |
| 322 | 0 | 1.403653 | 0.585 | 0.208 | 0 | 6 PPIF          |
| 323 | 0 | 1.342422 | 0.946 | 0.637 | 0 | 6 TIMP1         |
| 324 | 0 | 1.33289  | 0.384 | 0.035 | 0 | 6 IL1R2         |
| 325 | 0 | 1.31215  | 0.682 | 0.317 | 0 | 6 BCL2A1        |
| 326 | 0 | 1.294133 | 0.872 | 0.385 | 0 | 6 SAMSN1        |
| 327 | 0 | 1.256287 | 0.51  | 0.123 | 0 | 6 FPR2          |
| 328 | 0 | 1.243619 | 0.862 | 0.481 | 0 | 6 AREG          |
| 329 | 0 | 1.215331 | 0.611 | 0.196 | 0 | 6 MXD1          |
| 330 | 0 | 1.199673 | 0.972 | 0.49  | 0 | 6 FCER1G        |
| 331 | 0 | 1.198528 | 0.457 | 0.068 | 0 | 6 NLRP3         |
| 332 | 0 | 1.193085 | 0.579 | 0.174 | 0 | 6 FPR1          |
| 333 | 0 | 1.170192 | 0.42  | 0.028 | 0 | 6 CTB-61M7.2    |
| 334 | 0 | 1.157412 | 0.892 | 0.53  | 0 | 6 TYMP          |
| 335 | 0 | 1.133672 | 0.623 | 0.24  | 0 | 6 CD14          |
| 336 | 0 | 1.132358 | 0.862 | 0.598 | 0 | 6 ATP1B3        |
| 337 | 0 | 1.114898 | 0.542 | 0.266 | 0 | 6 INSIG1        |
| 338 | 0 | 1.108453 | 0.769 | 0.43  | 0 | 6 SLC2A3        |

|     |           |          |       |       |           |            |
|-----|-----------|----------|-------|-------|-----------|------------|
| 339 | 0         | 1.105937 | 0.598 | 0.278 | 0         | 6 GK       |
| 340 | 0         | 1.097329 | 0.869 | 0.526 | 0         | 6 COTL1    |
| 341 | 0         | 1.083069 | 0.993 | 0.762 | 0         | 6 SRGN     |
| 342 | 0         | 1.06655  | 0.446 | 0.049 | 0         | 6 CFP      |
| 343 | 0         | 1.065834 | 0.523 | 0.214 | 0         | 6 SLC25A37 |
| 344 | 0         | 1.048326 | 0.554 | 0.129 | 0         | 6 SERPINB9 |
| 345 | 0         | 1.035284 | 0.477 | 0.111 | 0         | 6 FGL2     |
| 346 | 0         | 1.033189 | 0.551 | 0.232 | 0         | 6 BASP1    |
| 347 | 8.11E-265 | 1.143067 | 0.42  | 0.194 | 2.73E-260 | 6 PLEK     |
| 348 | 2.68E-208 | 1.338769 | 0.407 | 0.194 | 9.04E-204 | 6 CCL20    |
| 349 | 2.11E-127 | 1.336877 | 0.367 | 0.211 | 7.11E-123 | 6 C15orf48 |
| 350 | 1.62E-122 | 1.173475 | 0.564 | 0.413 | 5.47E-118 | 6 CXCL3    |
| 351 | 0         | 3.363606 | 0.663 | 0.16  | 0         | 7 SCGB3A2  |
| 352 | 0         | 2.702608 | 0.857 | 0.139 | 0         | 7 SFTPB    |
| 353 | 0         | 2.477146 | 0.902 | 0.157 | 0         | 7 HOPX     |
| 354 | 0         | 2.340682 | 0.323 | 0.024 | 0         | 7 AGER     |
| 355 | 0         | 2.230703 | 0.616 | 0.072 | 0         | 7 MMP7     |
| 356 | 0         | 2.193485 | 0.816 | 0.097 | 0         | 7 KRT7     |
| 357 | 0         | 2.138722 | 0.737 | 0.053 | 0         | 7 CEACAM6  |
| 358 | 0         | 2.115179 | 0.84  | 0.272 | 0         | 7 RNASE1   |
| 359 | 0         | 2.113886 | 0.819 | 0.052 | 0         | 7 SFTA2    |
| 360 | 0         | 2.050581 | 0.748 | 0.236 | 0         | 7 EMP2     |
| 361 | 0         | 1.964945 | 0.835 | 0.507 | 0         | 7 CYB5A    |
| 362 | 0         | 1.942066 | 0.699 | 0.051 | 0         | 7 NAPSA    |
| 363 | 0         | 1.750017 | 0.705 | 0.105 | 0         | 7 FOLR1    |
| 364 | 0         | 1.631634 | 0.61  | 0.017 | 0         | 7 CTSE     |
| 365 | 0         | 1.59815  | 0.692 | 0.109 | 0         | 7 GPRC5A   |
| 366 | 0         | 1.580021 | 0.638 | 0.072 | 0         | 7 SLC34A2  |
| 367 | 0         | 1.568545 | 0.695 | 0.1   | 0         | 7 CXCL17   |
| 368 | 0         | 1.547976 | 0.802 | 0.138 | 0         | 7 KRT19    |
| 369 | 0         | 1.519035 | 0.76  | 0.16  | 0         | 7 KRT18    |
| 370 | 0         | 1.508556 | 0.738 | 0.141 | 0         | 7 KRT8     |
| 371 | 0         | 1.508293 | 0.533 | 0.101 | 0         | 7 SFTPA2   |
| 372 | 0         | 1.489384 | 0.784 | 0.152 | 0         | 7 WFDC2    |
| 373 | 0         | 1.468095 | 0.683 | 0.06  | 0         | 7 SFTA3    |
| 374 | 0         | 1.467713 | 0.766 | 0.122 | 0         | 7 FXYD3    |
| 375 | 0         | 1.467579 | 0.707 | 0.099 | 0         | 7 AGR3     |
| 376 | 0         | 1.39793  | 0.504 | 0.09  | 0         | 7 SFTPA1   |
| 377 | 0         | 1.359121 | 0.762 | 0.341 | 0         | 7 MGST1    |
| 378 | 0         | 1.355262 | 0.662 | 0.092 | 0         | 7 MUC1     |
| 379 | 0         | 1.343798 | 0.657 | 0.07  | 0         | 7 S100A14  |
| 380 | 0         | 1.32864  | 0.758 | 0.259 | 0         | 7 SLPI     |
| 381 | 0         | 1.297301 | 0.546 | 0.054 | 0         | 7 SFTA1P   |

|     |   |          |       |       |   |            |
|-----|---|----------|-------|-------|---|------------|
| 382 | 0 | 1.283072 | 0.59  | 0.208 | 0 | 7 CAV1     |
| 383 | 0 | 1.279106 | 0.613 | 0.092 | 0 | 7 EPCAM    |
| 384 | 0 | 1.248621 | 0.639 | 0.108 | 0 | 7 ELF3     |
| 385 | 0 | 1.245198 | 0.595 | 0.048 | 0 | 7 NKX2-1   |
| 386 | 0 | 1.242489 | 0.497 | 0.023 | 0 | 7 AQP4     |
| 387 | 0 | 1.234326 | 0.598 | 0.064 | 0 | 7 C19orf33 |
| 388 | 0 | 1.227668 | 0.716 | 0.229 | 0 | 7 ADIRF    |
| 389 | 0 | 1.221962 | 0.592 | 0.089 | 0 | 7 LMO7     |
| 390 | 0 | 1.214734 | 0.56  | 0.075 | 0 | 7 C16orf89 |
| 391 | 0 | 1.187449 | 0.677 | 0.124 | 0 | 7 TACSTD2  |
| 392 | 0 | 1.152457 | 0.502 | 0.144 | 0 | 7 TSPAN13  |
| 393 | 0 | 1.136759 | 0.408 | 0.052 | 0 | 7 CLIC3    |
| 394 | 0 | 1.099565 | 0.365 | 0.057 | 0 | 7 ANXA3    |
| 395 | 0 | 1.099012 | 0.613 | 0.098 | 0 | 7 CLDN4    |
| 396 | 0 | 1.092367 | 0.447 | 0.067 | 0 | 7 CYP4B1   |
| 397 | 0 | 1.087198 | 0.312 | 0.014 | 0 | 7 TNNC1    |
| 398 | 0 | 1.083534 | 0.492 | 0.092 | 0 | 7 CCND1    |
| 399 | 0 | 1.055947 | 0.557 | 0.099 | 0 | 7 NEDD4L   |
| 400 | 0 | 1.02084  | 0.635 | 0.285 | 0 | 7 ATP1B1   |
| 401 | 0 | 3.214167 | 0.994 | 0.075 | 0 | 8 CAPS     |
| 402 | 0 | 3.134228 | 0.984 | 0.03  | 0 | 8 TMEM190  |
| 403 | 0 | 3.099965 | 0.993 | 0.129 | 0 | 8 TPPP3    |
| 404 | 0 | 2.928799 | 0.986 | 0.032 | 0 | 8 C9orf24  |
| 405 | 0 | 2.854913 | 0.985 | 0.027 | 0 | 8 C20orf85 |
| 406 | 0 | 2.622557 | 0.984 | 0.069 | 0 | 8 TSPAN1   |
| 407 | 0 | 2.539615 | 0.984 | 0.025 | 0 | 8 RSPH1    |
| 408 | 0 | 2.505467 | 0.98  | 0.021 | 0 | 8 C1orf194 |
| 409 | 0 | 2.476742 | 0.979 | 0.02  | 0 | 8 FAM183A  |
| 410 | 0 | 2.427758 | 0.983 | 0.096 | 0 | 8 AGR3     |
| 411 | 0 | 2.253886 | 0.974 | 0.03  | 0 | 8 PIFO     |
| 412 | 0 | 2.240495 | 0.975 | 0.02  | 0 | 8 C5orf49  |
| 413 | 0 | 2.222915 | 0.986 | 0.218 | 0 | 8 CETN2    |
| 414 | 0 | 2.205698 | 0.993 | 0.578 | 0 | 8 PRDX5    |
| 415 | 0 | 2.187395 | 0.88  | 0.048 | 0 | 8 GSTA1    |
| 416 | 0 | 2.174796 | 0.973 | 0.146 | 0 | 8 MORN2    |
| 417 | 0 | 2.161806 | 0.969 | 0.026 | 0 | 8 C9orf116 |
| 418 | 0 | 2.116616 | 0.962 | 0.024 | 0 | 8 DNAAF1   |
| 419 | 0 | 2.106114 | 0.956 | 0.014 | 0 | 8 CAPSL    |
| 420 | 0 | 2.0749   | 0.957 | 0.013 | 0 | 8 C11orf88 |
| 421 | 0 | 2.068878 | 0.97  | 0.011 | 0 | 8 LRR1Q1   |
| 422 | 0 | 2.048089 | 0.965 | 0.103 | 0 | 8 ELF3     |
| 423 | 0 | 2.043261 | 0.903 | 0.031 | 0 | 8 C2orf40  |
| 424 | 0 | 2.028729 | 0.95  | 0.014 | 0 | 8 SNTN     |

|     |   |          |       |       |   |              |
|-----|---|----------|-------|-------|---|--------------|
| 425 | 0 | 2.021513 | 0.947 | 0.016 | 0 | 8 DYNLRB2    |
| 426 | 0 | 2.006424 | 0.957 | 0.026 | 0 | 8 MS4A8      |
| 427 | 0 | 1.975711 | 0.976 | 0.121 | 0 | 8 FXYD3      |
| 428 | 0 | 1.953086 | 0.972 | 0.221 | 0 | 8 ODF3B      |
| 429 | 0 | 1.909031 | 0.905 | 0.065 | 0 | 8 CD24       |
| 430 | 0 | 1.891533 | 0.842 | 0.027 | 0 | 8 OMG        |
| 431 | 0 | 1.889226 | 0.954 | 0.014 | 0 | 8 ZMYND10    |
| 432 | 0 | 1.877259 | 0.954 | 0.103 | 0 | 8 MRPS31     |
| 433 | 0 | 1.848309 | 0.954 | 0.068 | 0 | 8 FAM229B    |
| 434 | 0 | 1.84669  | 0.939 | 0.011 | 0 | 8 FAM92B     |
| 435 | 0 | 1.832857 | 0.932 | 0.023 | 0 | 8 CCDC146    |
| 436 | 0 | 1.822262 | 0.929 | 0.052 | 0 | 8 CLDN3      |
| 437 | 0 | 1.804406 | 0.97  | 0.306 | 0 | 8 PSENEIN    |
| 438 | 0 | 1.803236 | 0.936 | 0.011 | 0 | 8 MORN5      |
| 439 | 0 | 1.79638  | 0.995 | 0.742 | 0 | 8 GSTP1      |
| 440 | 0 | 1.792184 | 0.923 | 0.014 | 0 | 8 FOXJ1      |
| 441 | 0 | 1.769408 | 0.92  | 0.031 | 0 | 8 CCDC170    |
| 442 | 0 | 1.762696 | 0.932 | 0.041 | 0 | 8 SLC44A4    |
| 443 | 0 | 1.762571 | 0.929 | 0.061 | 0 | 8 SMIM22     |
| 444 | 0 | 1.756007 | 0.947 | 0.066 | 0 | 8 EFHC1      |
| 445 | 0 | 1.74975  | 0.934 | 0.011 | 0 | 8 CCDC78     |
| 446 | 0 | 1.73595  | 0.926 | 0.012 | 0 | 8 ROPN1L     |
| 447 | 0 | 1.728815 | 0.94  | 0.093 | 0 | 8 CLDN4      |
| 448 | 0 | 1.724352 | 0.935 | 0.05  | 0 | 8 TCTEX1D2   |
| 449 | 0 | 1.720479 | 0.922 | 0.012 | 0 | 8 AC013264.2 |
| 450 | 0 | 1.699213 | 0.925 | 0.099 | 0 | 8 AGR2       |
| 451 | 0 | 4.490719 | 0.883 | 0.43  | 0 | 9 SCGB1A1    |
| 452 | 0 | 4.262397 | 0.979 | 0.448 | 0 | 9 SCGB3A1    |
| 453 | 0 | 4.049249 | 0.882 | 0.097 | 0 | 9 BPIFB1     |
| 454 | 0 | 3.324823 | 0.978 | 0.254 | 0 | 9 SLPI       |
| 455 | 0 | 3.160957 | 0.956 | 0.149 | 0 | 9 WFDC2      |
| 456 | 0 | 3.148666 | 0.856 | 0.058 | 0 | 9 LCN2       |
| 457 | 0 | 2.806063 | 0.463 | 0.028 | 0 | 9 MSMB       |
| 458 | 0 | 2.69451  | 0.846 | 0.079 | 0 | 9 PIGR       |
| 459 | 0 | 2.202876 | 0.791 | 0.1   | 0 | 9 AGR2       |
| 460 | 0 | 2.189775 | 0.474 | 0.041 | 0 | 9 SAA1       |
| 461 | 0 | 2.172288 | 0.843 | 0.14  | 0 | 9 KRT19      |
| 462 | 0 | 2.146121 | 0.632 | 0.074 | 0 | 9 TFF3       |
| 463 | 0 | 2.10005  | 0.831 | 0.098 | 0 | 9 CXCL17     |
| 464 | 0 | 1.879105 | 0.662 | 0.125 | 0 | 9 CXCL1      |
| 465 | 0 | 1.810165 | 0.616 | 0.074 | 0 | 9 MMP7       |
| 466 | 0 | 1.766923 | 0.597 | 0.081 | 0 | 9 S100P      |
| 467 | 0 | 1.682994 | 0.36  | 0.017 | 0 | 9 SAA2       |

|     |           |          |       |       |           |             |
|-----|-----------|----------|-------|-------|-----------|-------------|
| 468 | 0         | 1.678524 | 0.751 | 0.124 | 0         | 9 TACSTD2   |
| 469 | 0         | 1.631801 | 0.755 | 0.102 | 0         | 9 KRT7      |
| 470 | 0         | 1.55432  | 0.478 | 0.014 | 0         | 9 MUC5B     |
| 471 | 0         | 1.543508 | 0.66  | 0.059 | 0         | 9 CEACAM6   |
| 472 | 0         | 1.484518 | 0.673 | 0.036 | 0         | 9 KLK11     |
| 473 | 0         | 1.480665 | 0.603 | 0.038 | 0         | 9 AQP5      |
| 474 | 0         | 1.458718 | 0.776 | 0.124 | 0         | 9 FXYD3     |
| 475 | 0         | 1.452152 | 0.723 | 0.107 | 0         | 9 ELF3      |
| 476 | 0         | 1.450247 | 0.713 | 0.174 | 0         | 9 MDK       |
| 477 | 0         | 1.422305 | 0.644 | 0.049 | 0         | 9 CP        |
| 478 | 0         | 1.411986 | 0.779 | 0.162 | 0         | 9 KRT18     |
| 479 | 0         | 1.406999 | 0.611 | 0.069 | 0         | 9 TMEM45A   |
| 480 | 0         | 1.382494 | 0.678 | 0.098 | 0         | 9 CLDN4     |
| 481 | 0         | 1.367143 | 0.667 | 0.06  | 0         | 9 TSPAN8    |
| 482 | 0         | 1.347923 | 0.861 | 0.508 | 0         | 9 CYB5A     |
| 483 | 0         | 1.291994 | 0.676 | 0.108 | 0         | 9 FOLR1     |
| 484 | 0         | 1.26259  | 0.418 | 0.028 | 0         | 9 PSCA      |
| 485 | 0         | 1.245403 | 0.639 | 0.214 | 0         | 9 SOX4      |
| 486 | 0         | 1.239527 | 0.799 | 0.342 | 0         | 9 MGST1     |
| 487 | 0         | 1.225798 | 0.688 | 0.094 | 0         | 9 MUC1      |
| 488 | 0         | 1.19979  | 0.697 | 0.285 | 0         | 9 ATP1B1    |
| 489 | 0         | 1.182372 | 0.7   | 0.145 | 0         | 9 KRT8      |
| 490 | 0         | 1.179569 | 0.554 | 0.093 | 0         | 9 F3        |
| 491 | 0         | 1.06882  | 0.629 | 0.113 | 0         | 9 GPRC5A    |
| 492 | 0         | 1.030874 | 0.634 | 0.076 | 0         | 9 TSPAN1    |
| 493 | 0         | 0.994566 | 0.465 | 0.063 | 0         | 9 ANKRD36C  |
| 494 | 0         | 0.992789 | 0.316 | 0.011 | 0         | 9 CXCL6     |
| 495 | 0         | 0.97061  | 0.556 | 0.055 | 0         | 9 GSTA1     |
| 496 | 0         | 0.962114 | 0.584 | 0.06  | 0         | 9 TMC5      |
| 497 | 0         | 0.946207 | 0.619 | 0.104 | 0         | 9 AGR3      |
| 498 | 1.19E-306 | 1.252167 | 0.699 | 0.314 | 4.01E-302 | 9 CXCL8     |
| 499 | 8.41E-280 | 1.074361 | 0.492 | 0.153 | 2.83E-275 | 9 SFTPB     |
| 500 | 9.87E-216 | 2.201939 | 0.473 | 0.168 | 3.33E-211 | 9 SCGB3A2   |
| 501 | 0         | 3.664768 | 0.823 | 0.172 | 0         | 10 TAGLN    |
| 502 | 0         | 3.465221 | 0.74  | 0.089 | 0         | 10 ACTA2    |
| 503 | 0         | 3.244179 | 0.851 | 0.168 | 0         | 10 MYL9     |
| 504 | 0         | 3.129978 | 0.779 | 0.107 | 0         | 10 TPM2     |
| 505 | 0         | 2.529349 | 0.782 | 0.166 | 0         | 10 CALD1    |
| 506 | 0         | 2.215376 | 0.612 | 0.06  | 0         | 10 PPP1R14A |
| 507 | 0         | 2.166321 | 0.821 | 0.377 | 0         | 10 IGFBP7   |
| 508 | 0         | 2.160634 | 0.291 | 0.005 | 0         | 10 DES      |
| 509 | 0         | 2.101044 | 0.434 | 0.014 | 0         | 10 MYH11    |
| 510 | 0         | 2.088178 | 0.443 | 0.008 | 0         | 10 COX4I2   |

|     |           |          |       |       |           |    |          |
|-----|-----------|----------|-------|-------|-----------|----|----------|
| 511 | 0         | 2.084385 | 0.345 | 0.044 | 0         | 10 | RGS5     |
| 512 | 0         | 2.069651 | 0.396 | 0.005 | 0         | 10 | HIGD1B   |
| 513 | 0         | 2.064256 | 0.345 | 0.006 | 0         | 10 | ACTG2    |
| 514 | 0         | 2.032895 | 0.42  | 0.015 | 0         | 10 | NDUFA4L2 |
| 515 | 0         | 2.003196 | 0.641 | 0.235 | 0         | 10 | ADIRF    |
| 516 | 0         | 1.974634 | 0.456 | 0.021 | 0         | 10 | EGFL6    |
| 517 | 0         | 1.974152 | 0.633 | 0.269 | 0         | 10 | TPM1     |
| 518 | 0         | 1.926606 | 0.571 | 0.083 | 0         | 10 | BGN      |
| 519 | 0         | 1.862526 | 0.525 | 0.081 | 0         | 10 | SOD3     |
| 520 | 0         | 1.828797 | 0.693 | 0.325 | 0         | 10 | GPX3     |
| 521 | 0         | 1.766167 | 0.431 | 0.084 | 0         | 10 | IGFBP5   |
| 522 | 0         | 1.706316 | 0.492 | 0.069 | 0         | 10 | MAP1B    |
| 523 | 0         | 1.628751 | 0.446 | 0.05  | 0         | 10 | CRYAB    |
| 524 | 0         | 1.538989 | 0.443 | 0.067 | 0         | 10 | MYLK     |
| 525 | 0         | 1.514991 | 0.41  | 0.097 | 0         | 10 | C11orf96 |
| 526 | 0         | 1.493737 | 0.418 | 0.059 | 0         | 10 | CRISPLD2 |
| 527 | 0         | 1.479953 | 0.673 | 0.201 | 0         | 10 | SPARCL1  |
| 528 | 0         | 1.42024  | 0.301 | 0.005 | 0         | 10 | PLN      |
| 529 | 0         | 1.380272 | 0.464 | 0.1   | 0         | 10 | TINAGL1  |
| 530 | 0         | 1.361878 | 0.449 | 0.103 | 0         | 10 | LHFP     |
| 531 | 0         | 1.356794 | 0.38  | 0.029 | 0         | 10 | PDGFRB   |
| 532 | 0         | 1.284648 | 0.453 | 0.088 | 0         | 10 | PLAC9    |
| 533 | 0         | 1.267442 | 0.381 | 0.062 | 0         | 10 | NEXN     |
| 534 | 0         | 1.256888 | 0.361 | 0.077 | 0         | 10 | COL4A1   |
| 535 | 0         | 1.230232 | 0.351 | 0.066 | 0         | 10 | ID4      |
| 536 | 0         | 1.203568 | 0.407 | 0.072 | 0         | 10 | CSRP2    |
| 537 | 0         | 1.172755 | 0.374 | 0.023 | 0         | 10 | NOTCH3   |
| 538 | 0         | 1.155489 | 0.309 | 0.053 | 0         | 10 | TCF21    |
| 539 | 6.07E-294 | 1.440415 | 0.547 | 0.178 | 2.05E-289 | 10 | MT1M     |
| 540 | 5.19E-278 | 1.367999 | 0.462 | 0.147 | 1.75E-273 | 10 | MFGE8    |
| 541 | 1.06E-276 | 1.510834 | 0.395 | 0.1   | 3.56E-272 | 10 | MT1A     |
| 542 | 1.10E-255 | 1.33668  | 0.61  | 0.258 | 3.72E-251 | 10 | SPARC    |
| 543 | 1.64E-241 | 1.631305 | 0.619 | 0.325 | 5.52E-237 | 10 | SELM     |
| 544 | 1.53E-240 | 1.336056 | 0.473 | 0.169 | 5.15E-236 | 10 | PRKCDDBP |
| 545 | 1.56E-207 | 1.185192 | 0.875 | 0.781 | 5.26E-203 | 10 | MT2A     |
| 546 | 6.65E-192 | 1.722083 | 0.727 | 0.628 | 2.24E-187 | 10 | DSTN     |
| 547 | 5.06E-108 | 1.158677 | 0.673 | 0.62  | 1.71E-103 | 10 | HSPB1    |
| 548 | 1.18E-72  | 1.167059 | 0.475 | 0.331 | 3.98E-68  | 10 | TACC1    |
| 549 | 8.13E-60  | 1.177148 | 0.372 | 0.235 | 2.74E-55  | 10 | CSRP1    |
| 550 | 2.02E-59  | 1.180574 | 0.316 | 0.168 | 6.80E-55  | 10 | IGFBP2   |
| 551 | 0         | 3.773775 | 0.734 | 0.111 | 0         | 11 | CCL4L2   |
| 552 | 0         | 3.455963 | 0.958 | 0.069 | 0         | 11 | GZMB     |
| 553 | 0         | 3.437004 | 0.967 | 0.052 | 0         | 11 | GNLY     |

|     |           |          |       |       |           |    |          |
|-----|-----------|----------|-------|-------|-----------|----|----------|
| 554 | 0         | 3.194051 | 0.975 | 0.216 | 0         | 11 | CCL4     |
| 555 | 0         | 3.069676 | 0.716 | 0.171 | 0         | 11 | CCL3     |
| 556 | 0         | 3.029319 | 0.985 | 0.091 | 0         | 11 | NKG7     |
| 557 | 0         | 2.603813 | 0.529 | 0.022 | 0         | 11 | XCL2     |
| 558 | 0         | 2.498994 | 0.909 | 0.043 | 0         | 11 | KLRD1    |
| 559 | 0         | 2.468381 | 0.874 | 0.041 | 0         | 11 | PRF1     |
| 560 | 0         | 2.351241 | 0.926 | 0.108 | 0         | 11 | CST7     |
| 561 | 0         | 2.175509 | 0.345 | 0.017 | 0         | 11 | IFNG     |
| 562 | 0         | 2.167411 | 0.827 | 0.114 | 0         | 11 | CCL5     |
| 563 | 0         | 2.166217 | 0.87  | 0.088 | 0         | 11 | CD7      |
| 564 | 0         | 2.075245 | 0.363 | 0.066 | 0         | 11 | CCL3L3   |
| 565 | 0         | 2.025952 | 0.642 | 0.017 | 0         | 11 | FGFBP2   |
| 566 | 0         | 2.020721 | 0.772 | 0.056 | 0         | 11 | KLRB1    |
| 567 | 0         | 1.998901 | 0.855 | 0.258 | 0         | 11 | DUSP2    |
| 568 | 0         | 1.855098 | 0.626 | 0.014 | 0         | 11 | KLRF1    |
| 569 | 0         | 1.822356 | 0.867 | 0.551 | 0         | 11 | ID2      |
| 570 | 0         | 1.749556 | 0.667 | 0.075 | 0         | 11 | CTSW     |
| 571 | 0         | 1.743914 | 0.266 | 0.017 | 0         | 11 | XCL1     |
| 572 | 0         | 1.682697 | 0.632 | 0.04  | 0         | 11 | CD247    |
| 573 | 0         | 1.662843 | 0.63  | 0.056 | 0         | 11 | GZMA     |
| 574 | 0         | 1.649782 | 0.56  | 0.035 | 0         | 11 | GZMH     |
| 575 | 0         | 1.600152 | 0.567 | 0.088 | 0         | 11 | SPON2    |
| 576 | 0         | 1.492275 | 0.876 | 0.499 | 0         | 11 | CREM     |
| 577 | 0         | 1.457564 | 0.523 | 0.065 | 0         | 11 | GNG2     |
| 578 | 0         | 1.417824 | 0.757 | 0.255 | 0         | 11 | ISG20    |
| 579 | 0         | 1.365264 | 0.304 | 0.014 | 0         | 11 | KLRC1    |
| 580 | 0         | 1.356878 | 0.629 | 0.149 | 0         | 11 | SYTL3    |
| 581 | 0         | 1.337449 | 0.494 | 0.038 | 0         | 11 | GZMM     |
| 582 | 0         | 1.257145 | 0.344 | 0.003 | 0         | 11 | SH2D1B   |
| 583 | 0         | 1.187649 | 0.99  | 0.769 | 0         | 11 | SRGN     |
| 584 | 0         | 1.140686 | 0.37  | 0.031 | 0         | 11 | SH2D2A   |
| 585 | 0         | 1.095443 | 0.323 | 0.04  | 0         | 11 | TNFRSF18 |
| 586 | 0         | 1.060763 | 0.389 | 0.071 | 0         | 11 | PTPN7    |
| 587 | 0         | 1.043806 | 0.653 | 0.168 | 0         | 11 | CD69     |
| 588 | 4.72E-300 | 1.07296  | 0.315 | 0.058 | 1.59E-295 | 11 | CLIC3    |
| 589 | 2.10E-297 | 1.288187 | 0.699 | 0.329 | 7.07E-293 | 11 | FCGR3A   |
| 590 | 2.36E-280 | 1.076249 | 0.503 | 0.153 | 7.96E-276 | 11 | FYN      |
| 591 | 1.70E-258 | 1.823092 | 0.6   | 0.287 | 5.72E-254 | 11 | CMC1     |
| 592 | 3.23E-244 | 1.115381 | 0.771 | 0.458 | 1.09E-239 | 11 | DDIT4    |
| 593 | 2.37E-237 | 1.452521 | 0.715 | 0.47  | 7.99E-233 | 11 | REL      |
| 594 | 2.12E-230 | 1.274884 | 0.627 | 0.324 | 7.13E-226 | 11 | SLA      |
| 595 | 3.69E-223 | 1.054194 | 0.439 | 0.145 | 1.24E-218 | 11 | IL2RG    |
| 596 | 9.68E-220 | 1.293774 | 0.777 | 0.495 | 3.26E-215 | 11 | AREG     |



|     |           |          |       |       |           |    |          |
|-----|-----------|----------|-------|-------|-----------|----|----------|
| 597 | 1.00E-186 | 1.047752 | 0.406 | 0.134 | 3.38E-182 | 11 | TUBA4A   |
| 598 | 1.24E-185 | 1.197843 | 0.449 | 0.18  | 4.16E-181 | 11 | CHST12   |
| 599 | 6.45E-184 | 1.328069 | 0.503 | 0.239 | 2.17E-179 | 11 | HAVCR2   |
| 600 | 1.47E-152 | 1.103409 | 0.621 | 0.403 | 4.96E-148 | 11 | NR4A2    |
| 601 | 0         | 5.323927 | 0.984 | 0.229 | 0         | 12 | SFTPC    |
| 602 | 0         | 4.372407 | 0.997 | 0.084 | 0         | 12 | SFTPA1   |
| 603 | 0         | 4.270162 | 0.987 | 0.096 | 0         | 12 | SFTPA2   |
| 604 | 0         | 3.154742 | 0.996 | 0.145 | 0         | 12 | SFTPB    |
| 605 | 0         | 3.100708 | 0.986 | 0.054 | 0         | 12 | NAPSA    |
| 606 | 0         | 2.966108 | 0.904 | 0.019 | 0         | 12 | PGC      |
| 607 | 0         | 2.713525 | 0.969 | 0.029 | 0         | 12 | SFTPD    |
| 608 | 0         | 2.426801 | 0.966 | 0.059 | 0         | 12 | SFTA2    |
| 609 | 0         | 2.205037 | 0.931 | 0.073 | 0         | 12 | SLC34A2  |
| 610 | 0         | 1.975242 | 0.957 | 0.165 | 0         | 12 | HOPX     |
| 611 | 0         | 1.741286 | 0.924 | 0.094 | 0         | 12 | MUC1     |
| 612 | 0         | 1.663259 | 0.912 | 0.063 | 0         | 12 | SFTA3    |
| 613 | 0         | 1.662311 | 0.988 | 0.26  | 0         | 12 | SLPI     |
| 614 | 0         | 1.576752 | 0.927 | 0.432 | 0         | 12 | CTSH     |
| 615 | 0         | 1.556599 | 0.997 | 0.729 | 0         | 12 | NPC2     |
| 616 | 0         | 1.544156 | 0.812 | 0.019 | 0         | 12 | ABCA3    |
| 617 | 0         | 1.532345 | 0.79  | 0.026 | 0         | 12 | PEBP4    |
| 618 | 0         | 1.522624 | 0.886 | 0.073 | 0         | 12 | S100A14  |
| 619 | 0         | 1.514718 | 0.811 | 0.048 | 0         | 12 | LRRK2    |
| 620 | 0         | 1.511592 | 0.85  | 0.018 | 0         | 12 | LAMP3    |
| 621 | 0         | 1.508055 | 0.91  | 0.103 | 0         | 12 | CXCL17   |
| 622 | 0         | 1.480263 | 0.947 | 0.342 | 0         | 12 | MGST1    |
| 623 | 0         | 1.448839 | 0.971 | 0.508 | 0         | 12 | CYB5A    |
| 624 | 0         | 1.40122  | 0.84  | 0.106 | 0         | 12 | LPCAT1   |
| 625 | 0         | 1.38871  | 0.871 | 0.362 | 0         | 12 | SERPINA1 |
| 626 | 0         | 1.332952 | 0.89  | 0.304 | 0         | 12 | SDC4     |
| 627 | 0         | 1.312301 | 0.818 | 0.174 | 0         | 12 | C8orf4   |
| 628 | 0         | 1.28542  | 0.713 | 0.01  | 0         | 12 | C4BPA    |
| 629 | 0         | 1.28205  | 0.854 | 0.166 | 0         | 12 | AK1      |
| 630 | 0         | 1.28059  | 0.579 | 0.014 | 0         | 12 | SLC6A14  |
| 631 | 0         | 1.267243 | 0.828 | 0.076 | 0         | 12 | C16orf89 |
| 632 | 0         | 1.264813 | 0.735 | 0.092 | 0         | 12 | C11orf96 |
| 633 | 0         | 1.258945 | 0.711 | 0.027 | 0         | 12 | WIF1     |
| 634 | 0         | 1.243172 | 0.259 | 0.001 | 0         | 12 | FGG      |
| 635 | 0         | 1.20756  | 0.675 | 0.017 | 0         | 12 | GKN2     |
| 636 | 0         | 1.200272 | 0.736 | 0.033 | 0         | 12 | SDR16C5  |
| 637 | 0         | 1.193453 | 0.849 | 0.086 | 0         | 12 | PIGR     |
| 638 | 0         | 1.181938 | 0.805 | 0.112 | 0         | 12 | SLC39A8  |
| 639 | 0         | 1.17838  | 0.856 | 0.255 | 0         | 12 | AQP3     |

|     |           |          |       |       |           |                  |
|-----|-----------|----------|-------|-------|-----------|------------------|
| 640 | 0         | 1.163301 | 0.811 | 0.116 | 0         | 12 DHCR24        |
| 641 | 0         | 1.15321  | 0.806 | 0.076 | 0         | 12 MALL          |
| 642 | 0         | 1.148028 | 0.732 | 0.027 | 0         | 12 ALPL          |
| 643 | 0         | 1.132576 | 0.873 | 0.165 | 0         | 12 KRT18         |
| 644 | 0         | 1.129846 | 0.6   | 0.004 | 0         | 12 PLA2G1B       |
| 645 | 0         | 1.118635 | 0.723 | 0.047 | 0         | 12 MFSD2A        |
| 646 | 0         | 1.113705 | 0.531 | 0.01  | 0         | 12 DMBT1         |
| 647 | 0         | 1.105101 | 0.925 | 0.277 | 0         | 12 RNASE1        |
| 648 | 0         | 1.049392 | 0.692 | 0.043 | 0         | 12 FASN          |
| 649 | 0         | 1.041417 | 0.741 | 0.069 | 0         | 12 FGGY          |
| 650 | 1.99E-210 | 1.178284 | 0.819 | 0.455 | 6.72E-206 | 12 CXCL2         |
| 651 | 0         | 3.890448 | 0.937 | 0.026 | 0         | 13 TPSAB1        |
| 652 | 0         | 3.804612 | 0.926 | 0.025 | 0         | 13 TPSB2         |
| 653 | 0         | 2.869323 | 0.865 | 0.164 | 0         | 13 CD69          |
| 654 | 0         | 2.82583  | 0.84  | 0.015 | 0         | 13 CPA3          |
| 655 | 0         | 2.55067  | 0.357 | 0.013 | 0         | 13 CTSG          |
| 656 | 0         | 2.439558 | 0.821 | 0.067 | 0         | 13 HPGDS         |
| 657 | 0         | 2.156277 | 0.875 | 0.38  | 0         | 13 RGS2          |
| 658 | 0         | 2.116755 | 0.721 | 0.011 | 0         | 13 MS4A2         |
| 659 | 0         | 2.112319 | 0.702 | 0.021 | 0         | 13 RGS13         |
| 660 | 0         | 2.01453  | 0.649 | 0.01  | 0         | 13 C1orf186      |
| 661 | 0         | 1.941712 | 0.936 | 0.492 | 0         | 13 AREG          |
| 662 | 0         | 1.92384  | 0.884 | 0.358 | 0         | 13 RGS1          |
| 663 | 0         | 1.814809 | 0.656 | 0.222 | 0         | 13 HPGD          |
| 664 | 0         | 1.733062 | 0.633 | 0.099 | 0         | 13 VWA5A         |
| 665 | 0         | 1.72674  | 0.589 | 0.01  | 0         | 13 KIT           |
| 666 | 0         | 1.651731 | 0.634 | 0.168 | 0         | 13 GPR65         |
| 667 | 0         | 1.639017 | 0.493 | 0.025 | 0         | 13 GATA2         |
| 668 | 0         | 1.630589 | 0.604 | 0.079 | 0         | 13 LTC4S         |
| 669 | 0         | 1.604261 | 0.514 | 0.018 | 0         | 13 FCER1A        |
| 670 | 0         | 1.533538 | 0.594 | 0.026 | 0         | 13 IL1RL1        |
| 671 | 0         | 1.512842 | 0.888 | 0.615 | 0         | 13 LAPTM4A       |
| 672 | 0         | 1.509781 | 0.515 | 0.007 | 0         | 13 SLC18A2       |
| 673 | 0         | 1.499832 | 0.539 | 0.041 | 0         | 13 MAOB          |
| 674 | 0         | 1.412176 | 0.476 | 0.008 | 0         | 13 RP11-354E11.2 |
| 675 | 0         | 1.306827 | 0.968 | 0.77  | 0         | 13 SRGN          |
| 676 | 0         | 1.237542 | 0.371 | 0.005 | 0         | 13 HDC           |
| 677 | 0         | 1.199187 | 0.591 | 0.172 | 0         | 13 RHOH          |
| 678 | 0         | 1.117346 | 0.506 | 0.124 | 0         | 13 BATF          |
| 679 | 0         | 1.007294 | 0.378 | 0.048 | 0         | 13 STXBP6        |
| 680 | 5.72E-295 | 1.031985 | 0.359 | 0.072 | 1.93E-290 | 13 SMYD3         |
| 681 | 5.40E-284 | 1.132581 | 0.935 | 0.819 | 1.82E-279 | 13 NFKBIA        |
| 682 | 8.01E-280 | 1.701334 | 0.742 | 0.354 | 2.70E-275 | 13 BIRC3         |

|     |           |          |       |       |           |    |         |
|-----|-----------|----------|-------|-------|-----------|----|---------|
| 683 | 3.76E-279 | 1.445863 | 0.666 | 0.301 | 1.27E-274 | 13 | CPM     |
| 684 | 3.24E-268 | 1.361942 | 0.598 | 0.218 | 1.09E-263 | 13 | SOCS1   |
| 685 | 1.06E-266 | 1.045288 | 0.378 | 0.087 | 3.58E-262 | 13 | SLC26A2 |
| 686 | 3.28E-253 | 1.443754 | 0.846 | 0.65  | 1.10E-248 | 13 | LMNA    |
| 687 | 4.88E-250 | 1.167025 | 0.897 | 0.722 | 1.64E-245 | 13 | TSC22D3 |
| 688 | 1.30E-237 | 1.316389 | 0.785 | 0.459 | 4.39E-233 | 13 | DDIT4   |
| 689 | 7.45E-217 | 1.209638 | 0.707 | 0.421 | 2.51E-212 | 13 | CKLF    |
| 690 | 4.77E-215 | 1.148382 | 0.731 | 0.405 | 1.61E-210 | 13 | SAMSN1  |
| 691 | 3.89E-214 | 1.070811 | 0.898 | 0.764 | 1.31E-209 | 13 | ANXA1   |
| 692 | 6.14E-188 | 1.042586 | 0.748 | 0.461 | 2.07E-183 | 13 | TNFAIP3 |
| 693 | 6.00E-182 | 1.215386 | 0.78  | 0.534 | 2.02E-177 | 13 | PLIN2   |
| 694 | 3.91E-170 | 1.09465  | 0.786 | 0.669 | 1.32E-165 | 13 | SELK    |
| 695 | 5.19E-163 | 1.020292 | 0.557 | 0.276 | 1.75E-158 | 13 | RAC2    |
| 696 | 2.18E-107 | 1.053772 | 0.316 | 0.116 | 7.33E-103 | 13 | PTGS2   |
| 697 | 9.14E-102 | 1.25561  | 0.606 | 0.413 | 3.08E-97  | 13 | TSC22D1 |
| 698 | 1.56E-73  | 1.015007 | 0.532 | 0.388 | 5.24E-69  | 13 | SYAP1   |
| 699 | 1.69E-35  | 1.018426 | 0.492 | 0.419 | 5.69E-31  | 13 | TUBA1A  |
| 700 | 2.23E-27  | 1.00481  | 0.439 | 0.393 | 7.53E-23  | 13 | FDX1    |
| 701 | 0         | 3.472053 | 0.967 | 0.051 | 0         | 14 | KRT17   |
| 702 | 0         | 2.896083 | 0.908 | 0.031 | 0         | 14 | KRT15   |
| 703 | 0         | 2.828361 | 0.963 | 0.064 | 0         | 14 | S100A2  |
| 704 | 0         | 2.252237 | 0.85  | 0.009 | 0         | 14 | KRT5    |
| 705 | 0         | 2.207811 | 0.98  | 0.147 | 0         | 14 | KRT19   |
| 706 | 0         | 1.897686 | 0.949 | 0.194 | 0         | 14 | ID1     |
| 707 | 0         | 1.800893 | 0.946 | 0.129 | 0         | 14 | TACSTD2 |
| 708 | 0         | 1.782178 | 0.971 | 0.153 | 0         | 14 | PERP    |
| 709 | 0         | 1.774302 | 0.949 | 0.256 | 0         | 14 | AQP3    |
| 710 | 0         | 1.652083 | 0.304 | 0.012 | 0         | 14 | MMP1    |
| 711 | 0         | 1.623667 | 0.946 | 0.167 | 0         | 14 | KRT18   |
| 712 | 0         | 1.491455 | 0.833 | 0.206 | 0         | 14 | ERRFI1  |
| 713 | 0         | 1.361892 | 0.962 | 0.13  | 0         | 14 | FXDY3   |
| 714 | 0         | 1.360108 | 0.773 | 0.096 | 0         | 14 | F3      |
| 715 | 0         | 1.353407 | 0.739 | 0.113 | 0         | 14 | HMGB3   |
| 716 | 0         | 1.345877 | 0.922 | 0.149 | 0         | 14 | KRT8    |
| 717 | 0         | 1.317211 | 0.812 | 0.038 | 0         | 14 | SFN     |
| 718 | 0         | 1.262405 | 0.911 | 0.287 | 0         | 14 | ATP1B1  |
| 719 | 0         | 1.252644 | 0.881 | 0.113 | 0         | 14 | ELF3    |
| 720 | 0         | 1.24103  | 0.866 | 0.116 | 0         | 14 | GPRC5A  |
| 721 | 0         | 1.239387 | 0.99  | 0.51  | 0         | 14 | CYB5A   |
| 722 | 0         | 1.216023 | 0.821 | 0.102 | 0         | 14 | BCAM    |
| 723 | 0         | 1.198223 | 0.664 | 0.02  | 0         | 14 | ALDH3A1 |
| 724 | 0         | 1.174894 | 0.966 | 0.472 | 0         | 14 | ZFP36L1 |
| 725 | 0         | 1.157286 | 0.962 | 0.358 | 0         | 14 | SPINT2  |

|     |           |          |       |       |           |    |          |
|-----|-----------|----------|-------|-------|-----------|----|----------|
| 726 | 0         | 1.134964 | 0.691 | 0.077 | 0         | 14 | FBXO32   |
| 727 | 0         | 1.12798  | 0.85  | 0.16  | 0         | 14 | IGFBP2   |
| 728 | 0         | 1.12416  | 0.312 | 0.005 | 0         | 14 | KRT6A    |
| 729 | 0         | 1.117266 | 0.762 | 0.104 | 0         | 14 | CLDN4    |
| 730 | 0         | 1.115542 | 0.792 | 0.059 | 0         | 14 | FHL2     |
| 731 | 0         | 1.110553 | 0.903 | 0.331 | 0         | 14 | EGR1     |
| 732 | 0         | 1.107844 | 0.79  | 0.078 | 0         | 14 | S100A14  |
| 733 | 0         | 1.107841 | 0.661 | 0.176 | 0         | 14 | RPS4Y1   |
| 734 | 0         | 1.103168 | 0.786 | 0.11  | 0         | 14 | KRT7     |
| 735 | 0         | 1.087943 | 0.843 | 0.134 | 0         | 14 | MPZL2    |
| 736 | 0         | 1.079456 | 0.592 | 0.024 | 0         | 14 | SYT8     |
| 737 | 0         | 1.066357 | 0.631 | 0.085 | 0         | 14 | IGFBP6   |
| 738 | 0         | 1.03154  | 0.996 | 0.744 | 0         | 14 | GSTP1    |
| 739 | 0         | 1.027106 | 0.79  | 0.058 | 0         | 14 | SDC1     |
| 740 | 0         | 1.024523 | 0.787 | 0.092 | 0         | 14 | KLF5     |
| 741 | 0         | 1.020077 | 0.868 | 0.181 | 0         | 14 | SERPINF1 |
| 742 | 0         | 0.993167 | 0.745 | 0.044 | 0         | 14 | LAMB3    |
| 743 | 0         | 0.975435 | 0.772 | 0.061 | 0         | 14 | EHF      |
| 744 | 0         | 0.969788 | 0.778 | 0.217 | 0         | 14 | SOX4     |
| 745 | 5.61E-280 | 1.134453 | 0.522 | 0.117 | 1.89E-275 | 14 | GDF15    |
| 746 | 2.17E-271 | 0.963974 | 0.985 | 0.591 | 7.30E-267 | 14 | CD9      |
| 747 | 1.48E-250 | 1.027422 | 0.949 | 0.531 | 4.99E-246 | 14 | CEBPD    |
| 748 | 2.08E-236 | 0.985661 | 0.941 | 0.55  | 7.01E-232 | 14 | FOSB     |
| 749 | 6.05E-235 | 1.122153 | 0.96  | 0.586 | 2.04E-230 | 14 | JUN      |
| 750 | 1.87E-194 | 0.981058 | 0.822 | 0.4   | 6.30E-190 | 14 | ATF3     |
| 751 | 0         | 1.850965 | 0.928 | 0.298 | 0         | 15 | STMN1    |
| 752 | 0         | 1.761689 | 0.839 | 0.021 | 0         | 15 | KIAA0101 |
| 753 | 0         | 1.612102 | 0.987 | 0.717 | 0         | 15 | TUBA1B   |
| 754 | 0         | 1.553593 | 0.946 | 0.553 | 0         | 15 | TUBB     |
| 755 | 0         | 1.54475  | 0.97  | 0.698 | 0         | 15 | H2AFZ    |
| 756 | 0         | 1.445625 | 0.954 | 0.61  | 0         | 15 | HMGN2    |
| 757 | 0         | 1.394065 | 0.648 | 0.155 | 0         | 15 | HIST1H4C |
| 758 | 0         | 1.321353 | 0.735 | 0.024 | 0         | 15 | TYMS     |
| 759 | 0         | 1.291878 | 0.736 | 0.025 | 0         | 15 | TK1      |
| 760 | 0         | 1.275609 | 0.617 | 0.005 | 0         | 15 | UBE2C    |
| 761 | 0         | 1.227988 | 0.66  | 0.08  | 0         | 15 | PTTG1    |
| 762 | 0         | 1.138172 | 0.833 | 0.226 | 0         | 15 | CKS1B    |
| 763 | 0         | 1.093486 | 0.56  | 0.004 | 0         | 15 | RRM2     |
| 764 | 0         | 1.064451 | 0.613 | 0.017 | 0         | 15 | CDK1     |
| 765 | 0         | 0.965287 | 0.642 | 0.17  | 0         | 15 | PCNA     |
| 766 | 0         | 0.921822 | 0.601 | 0.004 | 0         | 15 | BIRC5    |
| 767 | 0         | 0.910329 | 0.571 | 0.019 | 0         | 15 | CDKN3    |
| 768 | 0         | 0.904273 | 0.684 | 0.104 | 0         | 15 | TMEM106C |

|     |           |          |       |       |           |    |          |
|-----|-----------|----------|-------|-------|-----------|----|----------|
| 769 | 0         | 0.895554 | 0.717 | 0.108 | 0         | 15 | CENPW    |
| 770 | 0         | 0.884172 | 0.522 | 0.005 | 0         | 15 | TOP2A    |
| 771 | 0         | 0.873246 | 0.563 | 0.02  | 0         | 15 | NUSAP1   |
| 772 | 0         | 0.843868 | 0.545 | 0.002 | 0         | 15 | MKI67    |
| 773 | 0         | 0.778296 | 0.677 | 0.145 | 0         | 15 | SMC4     |
| 774 | 0         | 0.748627 | 0.587 | 0.038 | 0         | 15 | CENPM    |
| 775 | 0         | 0.738741 | 0.502 | 0.011 | 0         | 15 | CENPF    |
| 776 | 0         | 0.684304 | 0.652 | 0.125 | 0         | 15 | DTYMK    |
| 777 | 0         | 0.682037 | 0.457 | 0.009 | 0         | 15 | CDT1     |
| 778 | 0         | 0.681329 | 0.594 | 0.025 | 0         | 15 | ZWINT    |
| 779 | 0         | 0.668889 | 0.619 | 0.079 | 0         | 15 | SMC2     |
| 780 | 9.35E-253 | 0.80897  | 0.753 | 0.278 | 3.15E-248 | 15 | IDH2     |
| 781 | 1.10E-242 | 0.997325 | 0.966 | 0.78  | 3.71E-238 | 15 | HMGB1    |
| 782 | 9.17E-242 | 0.949493 | 0.882 | 0.493 | 3.09E-237 | 15 | H2AFV    |
| 783 | 3.54E-240 | 0.870003 | 0.871 | 0.491 | 1.19E-235 | 15 | DEK      |
| 784 | 2.19E-236 | 0.678286 | 0.769 | 0.299 | 7.37E-232 | 15 | RPA3     |
| 785 | 2.41E-217 | 0.752181 | 0.745 | 0.275 | 8.13E-213 | 15 | CKS2     |
| 786 | 2.15E-216 | 0.889167 | 0.887 | 0.527 | 7.24E-212 | 15 | ANP32B   |
| 787 | 4.59E-216 | 0.976735 | 0.824 | 0.416 | 1.55E-211 | 15 | DUT      |
| 788 | 4.64E-200 | 1.022007 | 0.876 | 0.451 | 1.56E-195 | 15 | HMGB2    |
| 789 | 3.65E-194 | 0.678309 | 0.814 | 0.405 | 1.23E-189 | 15 | LSM4     |
| 790 | 3.84E-170 | 0.751156 | 0.828 | 0.478 | 1.29E-165 | 15 | RANBP1   |
| 791 | 2.06E-162 | 0.794023 | 0.777 | 0.376 | 6.94E-158 | 15 | TUBA1C   |
| 792 | 2.88E-155 | 0.681059 | 0.855 | 0.488 | 9.71E-151 | 15 | NUCKS1   |
| 793 | 7.17E-137 | 0.835755 | 0.773 | 0.375 | 2.42E-132 | 15 | C1QB     |
| 794 | 4.09E-121 | 0.808285 | 0.76  | 0.426 | 1.38E-116 | 15 | CTSZ     |
| 795 | 1.38E-119 | 0.71492  | 0.772 | 0.384 | 4.66E-115 | 15 | C1QA     |
| 796 | 1.55E-100 | 0.758067 | 0.637 | 0.322 | 5.24E-96  | 15 | FN1      |
| 797 | 1.21E-98  | 1.0153   | 0.66  | 0.351 | 4.06E-94  | 15 | CCL18    |
| 798 | 5.25E-98  | 0.673384 | 0.78  | 0.457 | 1.77E-93  | 15 | APOC1    |
| 799 | 1.04E-89  | 0.685794 | 0.7   | 0.378 | 3.49E-85  | 15 | FBP1     |
| 800 | 6.31E-37  | 0.745716 | 0.339 | 0.17  | 2.13E-32  | 15 | SPP1     |
| 801 | 0         | 3.447716 | 0.433 | 0.015 | 0         | 16 | CCL17    |
| 802 | 0         | 2.140945 | 0.999 | 0.611 | 0         | 16 | HLA-DPB1 |
| 803 | 0         | 1.971462 | 0.982 | 0.416 | 0         | 16 | HLA-DQA1 |
| 804 | 0         | 1.887278 | 0.999 | 0.627 | 0         | 16 | HLA-DPA1 |
| 805 | 0         | 1.811847 | 0.941 | 0.254 | 0         | 16 | GPR183   |
| 806 | 0         | 1.809323 | 0.99  | 0.508 | 0         | 16 | HLA-DQB1 |
| 807 | 0         | 1.777036 | 1     | 0.777 | 0         | 16 | CD74     |
| 808 | 0         | 1.741819 | 1     | 0.715 | 0         | 16 | HLA-DRA  |
| 809 | 0         | 1.587672 | 0.396 | 0.021 | 0         | 16 | S100B    |
| 810 | 0         | 1.584781 | 0.994 | 0.629 | 0         | 16 | HLA-DRB1 |
| 811 | 0         | 1.527395 | 0.928 | 0.49  | 0         | 16 | HLA-DRB5 |

|     |           |          |       |       |           |             |
|-----|-----------|----------|-------|-------|-----------|-------------|
| 812 | 0         | 1.294044 | 0.804 | 0.249 | 0         | 16 MS4A6A   |
| 813 | 0         | 1.20964  | 0.505 | 0.047 | 0         | 16 IL1R2    |
| 814 | 0         | 1.163356 | 0.539 | 0.029 | 0         | 16 CLEC10A  |
| 815 | 0         | 1.144524 | 0.428 | 0.022 | 0         | 16 FCER1A   |
| 816 | 0         | 1.114326 | 0.702 | 0.153 | 0         | 16 RNASE6   |
| 817 | 0         | 1.063878 | 0.549 | 0.035 | 0         | 16 PKIB     |
| 818 | 0         | 1.056063 | 0.878 | 0.338 | 0         | 16 HLA-DMB  |
| 819 | 0         | 1.050287 | 0.565 | 0.082 | 0         | 16 FCGR2B   |
| 820 | 0         | 1.045722 | 0.704 | 0.183 | 0         | 16 DUSP4    |
| 821 | 0         | 1.037415 | 0.721 | 0.122 | 0         | 16 CSF2RA   |
| 822 | 0         | 1.02976  | 0.357 | 0.004 | 0         | 16 CD1C     |
| 823 | 0         | 0.931487 | 0.683 | 0.166 | 0         | 16 CD86     |
| 824 | 0         | 0.816821 | 0.651 | 0.144 | 0         | 16 SERPINB9 |
| 825 | 0         | 0.802017 | 0.281 | 0.002 | 0         | 16 CD1E     |
| 826 | 0         | 0.801144 | 0.54  | 0.116 | 0         | 16 FAM26F   |
| 827 | 9.36E-308 | 1.061562 | 0.96  | 0.473 | 3.16E-303 | 16 HLA-DMA  |
| 828 | 4.17E-298 | 0.834294 | 0.71  | 0.211 | 1.41E-293 | 16 MXD1     |
| 829 | 5.46E-295 | 1.284339 | 0.587 | 0.146 | 1.84E-290 | 16 HLA-DQA2 |
| 830 | 3.92E-291 | 1.487391 | 0.758 | 0.273 | 1.32E-286 | 16 INSIG1   |
| 831 | 7.30E-280 | 1.49722  | 0.915 | 0.495 | 2.46E-275 | 16 AREG     |
| 832 | 1.09E-272 | 0.890347 | 0.675 | 0.205 | 3.67E-268 | 16 NR4A3    |
| 833 | 3.73E-271 | 0.982688 | 0.598 | 0.165 | 1.26E-266 | 16 AXL      |
| 834 | 5.88E-259 | 1.236616 | 0.775 | 0.304 | 1.98E-254 | 16 CD83     |
| 835 | 1.88E-250 | 0.875502 | 0.888 | 0.409 | 6.33E-246 | 16 RGS10    |
| 836 | 2.91E-249 | 1.030676 | 0.871 | 0.383 | 9.79E-245 | 16 RGS2     |
| 837 | 3.39E-243 | 0.851779 | 0.898 | 0.366 | 1.14E-238 | 16 LST1     |
| 838 | 9.17E-227 | 0.811816 | 0.567 | 0.167 | 3.09E-222 | 16 JAML     |
| 839 | 1.53E-225 | 1.205467 | 0.975 | 0.727 | 5.14E-221 | 16 CST3     |
| 840 | 3.83E-219 | 0.99717  | 0.878 | 0.469 | 1.29E-214 | 16 REL      |
| 841 | 8.73E-219 | 1.161611 | 0.638 | 0.212 | 2.94E-214 | 16 C15orf48 |
| 842 | 2.82E-213 | 0.845785 | 0.947 | 0.543 | 9.50E-209 | 16 TYMP     |
| 843 | 1.97E-202 | 0.812363 | 0.991 | 0.858 | 6.64E-198 | 16 SAT1     |
| 844 | 7.43E-173 | 0.867082 | 0.555 | 0.194 | 2.50E-168 | 16 CPVL     |
| 845 | 1.44E-168 | 0.95705  | 0.888 | 0.59  | 4.84E-164 | 16 HERPUD1  |
| 846 | 5.99E-166 | 0.885181 | 0.764 | 0.384 | 2.02E-161 | 16 SGK1     |
| 847 | 1.58E-151 | 0.8143   | 0.842 | 0.454 | 5.31E-147 | 16 PLAUR    |
| 848 | 5.66E-144 | 0.812112 | 0.817 | 0.463 | 1.91E-139 | 16 YWHAH    |
| 849 | 9.96E-104 | 0.809735 | 0.475 | 0.194 | 3.36E-99  | 16 EREG     |
| 850 | 1.12E-65  | 1.131102 | 0.417 | 0.196 | 3.76E-61  | 16 GOS2     |
| 851 | 0         | 5.556021 | 0.971 | 0.046 | 0         | 17 CCL21    |
| 852 | 0         | 2.890234 | 0.93  | 0.077 | 0         | 17 TFF3     |
| 853 | 0         | 2.377837 | 0.916 | 0.171 | 0         | 17 GNG11    |
| 854 | 0         | 2.315694 | 0.799 | 0.034 | 0         | 17 MMRN1    |

|     |           |          |       |       |           |            |
|-----|-----------|----------|-------|-------|-----------|------------|
| 855 | 0         | 2.117619 | 0.864 | 0.151 | 0         | 17 SDPR    |
| 856 | 0         | 2.025508 | 0.888 | 0.235 | 0         | 17 TFPI    |
| 857 | 0         | 1.985575 | 0.876 | 0.236 | 0         | 17 ADIRF   |
| 858 | 0         | 1.96793  | 0.602 | 0.1   | 0         | 17 RGS16   |
| 859 | 0         | 1.904046 | 0.718 | 0.051 | 0         | 17 SNCG    |
| 860 | 0         | 1.868714 | 0.951 | 0.38  | 0         | 17 IGFBP7  |
| 861 | 0         | 1.860284 | 0.715 | 0.098 | 0         | 17 AKAP12  |
| 862 | 0         | 1.852505 | 0.372 | 0.005 | 0         | 17 NTS     |
| 863 | 0         | 1.811947 | 0.787 | 0.096 | 0         | 17 PPFIBP1 |
| 864 | 0         | 1.742025 | 0.801 | 0.135 | 0         | 17 ECSCR.1 |
| 865 | 0         | 1.655536 | 0.536 | 0.024 | 0         | 17 LYVE1   |
| 866 | 0         | 1.557951 | 0.83  | 0.131 | 0         | 17 CLDN5   |
| 867 | 0         | 1.465526 | 0.831 | 0.366 | 0         | 17 APP     |
| 868 | 0         | 1.388135 | 0.721 | 0.106 | 0         | 17 RAMP2   |
| 869 | 0         | 1.383858 | 0.783 | 0.24  | 0         | 17 CLU     |
| 870 | 0         | 1.354539 | 0.854 | 0.258 | 0         | 17 NNMT    |
| 871 | 0         | 1.264331 | 0.63  | 0.112 | 0         | 17 FXYD6   |
| 872 | 0         | 1.252888 | 0.709 | 0.19  | 0         | 17 HYAL2   |
| 873 | 0         | 1.227764 | 0.54  | 0.039 | 0         | 17 PDPN    |
| 874 | 0         | 1.179704 | 0.851 | 0.214 | 0         | 17 TIMP3   |
| 875 | 0         | 1.177559 | 0.586 | 0.14  | 0         | 17 PROCR   |
| 876 | 0         | 1.166126 | 0.524 | 0.05  | 0         | 17 APOLD1  |
| 877 | 0         | 1.161172 | 0.582 | 0.039 | 0         | 17 KANK3   |
| 878 | 0         | 1.160954 | 0.479 | 0.03  | 0         | 17 TM4SF18 |
| 879 | 0         | 1.145061 | 0.638 | 0.12  | 0         | 17 EGFL7   |
| 880 | 0         | 1.122693 | 0.726 | 0.209 | 0         | 17 CNN3    |
| 881 | 0         | 1.11806  | 0.789 | 0.213 | 0         | 17 CAV1    |
| 882 | 0         | 1.067344 | 0.528 | 0.046 | 0         | 17 LAYN    |
| 883 | 0         | 1.041682 | 0.496 | 0.054 | 0         | 17 GGT5    |
| 884 | 1.27E-296 | 1.092597 | 0.598 | 0.152 | 4.27E-292 | 17 MTUS1   |
| 885 | 1.08E-287 | 1.040826 | 0.782 | 0.244 | 3.65E-283 | 17 TM4SF1  |
| 886 | 1.04E-283 | 1.484767 | 0.527 | 0.118 | 3.51E-279 | 17 EFEMP1  |
| 887 | 4.89E-264 | 1.043553 | 0.688 | 0.214 | 1.65E-259 | 17 CRIP2   |
| 888 | 4.02E-248 | 1.237177 | 0.92  | 0.617 | 1.35E-243 | 17 HSPB1   |
| 889 | 3.43E-243 | 1.081835 | 0.54  | 0.14  | 1.16E-238 | 17 PLPP1   |
| 890 | 1.07E-236 | 1.290169 | 0.798 | 0.404 | 3.60E-232 | 17 GYPC    |
| 891 | 3.25E-221 | 1.029307 | 0.934 | 0.59  | 1.09E-216 | 17 IFITM3  |
| 892 | 5.20E-211 | 1.15665  | 0.794 | 0.46  | 1.75E-206 | 17 RAB11A  |
| 893 | 1.08E-208 | 1.092649 | 0.891 | 0.59  | 3.65E-204 | 17 CD59    |
| 894 | 2.54E-187 | 1.128724 | 0.584 | 0.197 | 8.55E-183 | 17 MYC     |
| 895 | 4.25E-184 | 1.265686 | 0.588 | 0.203 | 1.43E-179 | 17 HES1    |
| 896 | 1.36E-169 | 1.027096 | 0.676 | 0.334 | 4.58E-165 | 17 MGST2   |
| 897 | 4.24E-165 | 1.355213 | 0.372 | 0.089 | 1.43E-160 | 17 IGFBP5  |

|     |           |          |       |       |           |    |               |
|-----|-----------|----------|-------|-------|-----------|----|---------------|
| 898 | 2.42E-125 | 1.133136 | 0.763 | 0.532 | 8.15E-121 | 17 | KLF4          |
| 899 | 1.55E-123 | 1.031696 | 0.73  | 0.462 | 5.23E-119 | 17 | ARL4A         |
| 900 | 1.14E-98  | 1.29347  | 0.676 | 0.412 | 3.84E-94  | 17 | HSPA1A        |
| 901 | 0         | 3.387453 | 0.964 | 0.033 | 0         | 18 | TPSAB1        |
| 902 | 0         | 3.355273 | 0.955 | 0.032 | 0         | 18 | TPSB2         |
| 903 | 0         | 2.546954 | 0.482 | 0.014 | 0         | 18 | CTSG          |
| 904 | 0         | 2.441235 | 0.749 | 0.023 | 0         | 18 | CPA3          |
| 905 | 0         | 2.202356 | 0.713 | 0.075 | 0         | 18 | HPGDS         |
| 906 | 0         | 2.031603 | 0.613 | 0.028 | 0         | 18 | RGS13         |
| 907 | 0         | 2.030224 | 0.631 | 0.019 | 0         | 18 | MS4A2         |
| 908 | 0         | 1.955578 | 0.731 | 0.172 | 0         | 18 | CD69          |
| 909 | 0         | 1.634087 | 0.491 | 0.085 | 0         | 18 | LTC4S         |
| 910 | 0         | 1.594493 | 0.428 | 0.019 | 0         | 18 | C1orf186      |
| 911 | 0         | 1.518637 | 0.422 | 0.024 | 0         | 18 | FCER1A        |
| 912 | 0         | 1.470946 | 0.419 | 0.018 | 0         | 18 | KIT           |
| 913 | 0         | 1.359718 | 0.358 | 0.013 | 0         | 18 | SLC18A2       |
| 914 | 0         | 1.353823 | 0.354 | 0.014 | 0         | 18 | RP11-354E11.2 |
| 915 | 0         | 1.18498  | 0.41  | 0.034 | 0         | 18 | IL1RL1        |
| 916 | 0         | 1.014958 | 0.251 | 0.01  | 0         | 18 | HDC           |
| 917 | 1.10E-300 | 1.231865 | 0.358 | 0.048 | 3.71E-296 | 18 | MAOB          |
| 918 | 1.94E-277 | 1.720497 | 0.861 | 0.363 | 6.53E-273 | 18 | RGS1          |
| 919 | 1.31E-250 | 1.596012 | 0.478 | 0.106 | 4.40E-246 | 18 | VWA5A         |
| 920 | 1.87E-240 | 1.838859 | 0.8   | 0.385 | 6.30E-236 | 18 | RGS2          |
| 921 | 2.20E-239 | 0.999627 | 0.267 | 0.032 | 7.42E-235 | 18 | GATA2         |
| 922 | 2.86E-208 | 1.124907 | 0.96  | 0.772 | 9.65E-204 | 18 | SRGN          |
| 923 | 9.20E-183 | 1.410145 | 0.858 | 0.497 | 3.10E-178 | 18 | AREG          |
| 924 | 3.44E-179 | 1.397073 | 0.831 | 0.618 | 1.16E-174 | 18 | LAPTM4A       |
| 925 | 2.98E-169 | 1.219184 | 0.893 | 0.723 | 1.00E-164 | 18 | TSC22D3       |
| 926 | 8.99E-155 | 1.617974 | 0.703 | 0.358 | 3.03E-150 | 18 | BIRC3         |
| 927 | 6.61E-151 | 1.13271  | 0.906 | 0.82  | 2.23E-146 | 18 | NFKBIA        |
| 928 | 3.32E-146 | 0.98036  | 0.849 | 0.473 | 1.12E-141 | 18 | ALOX5AP       |
| 929 | 3.00E-143 | 1.496102 | 0.555 | 0.222 | 1.01E-138 | 18 | SOCS1         |
| 930 | 2.42E-137 | 1.52256  | 0.801 | 0.652 | 8.14E-133 | 18 | LMNA          |
| 931 | 1.67E-128 | 1.180954 | 0.496 | 0.177 | 5.61E-124 | 18 | RHOH          |
| 932 | 6.37E-124 | 1.459339 | 0.588 | 0.305 | 2.15E-119 | 18 | CPM           |
| 933 | 1.18E-123 | 1.133428 | 0.869 | 0.766 | 3.96E-119 | 18 | ANXA1         |
| 934 | 1.14E-122 | 1.357041 | 0.758 | 0.537 | 3.82E-118 | 18 | PLIN2         |
| 935 | 1.81E-120 | 1.386469 | 0.466 | 0.174 | 6.10E-116 | 18 | GPR65         |
| 936 | 3.72E-111 | 0.967476 | 0.406 | 0.129 | 1.25E-106 | 18 | BATF          |
| 937 | 5.19E-106 | 1.162902 | 0.758 | 0.67  | 1.75E-101 | 18 | SELK          |
| 938 | 1.68E-99  | 1.268934 | 0.69  | 0.463 | 5.65E-95  | 18 | DDIT4         |
| 939 | 1.42E-98  | 1.257351 | 0.636 | 0.424 | 4.80E-94  | 18 | CKLF          |
| 940 | 5.84E-90  | 1.010891 | 0.297 | 0.09  | 1.97E-85  | 18 | SLC26A2       |



|     |           |          |       |       |           |              |
|-----|-----------|----------|-------|-------|-----------|--------------|
| 941 | 6.58E-86  | 1.326422 | 0.472 | 0.228 | 2.22E-81  | 18 HPGD      |
| 942 | 9.79E-77  | 1.585087 | 0.603 | 0.414 | 3.30E-72  | 18 TSC22D1   |
| 943 | 4.42E-74  | 0.980392 | 0.621 | 0.409 | 1.49E-69  | 18 SAMS1     |
| 944 | 4.30E-64  | 0.950039 | 0.261 | 0.09  | 1.45E-59  | 18 CNRIP1    |
| 945 | 5.59E-61  | 0.939317 | 0.625 | 0.465 | 1.88E-56  | 18 TNFAIP3   |
| 946 | 7.24E-48  | 0.991997 | 0.364 | 0.19  | 2.44E-43  | 18 TMEM176B  |
| 947 | 3.07E-29  | 1.238333 | 0.497 | 0.42  | 1.03E-24  | 18 TUBA1A    |
| 948 | 1.70E-24  | 0.946981 | 0.31  | 0.204 | 5.72E-20  | 18 CTNBL1    |
| 949 | 6.32E-22  | 1.172847 | 0.439 | 0.394 | 2.13E-17  | 18 FDX1      |
| 950 | 5.02E-18  | 1.006035 | 0.431 | 0.391 | 1.69E-13  | 18 SYAP1     |
| 951 | 0         | 2.219371 | 0.678 | 0.006 | 0         | 19 CD79A     |
| 952 | 0         | 1.702593 | 0.552 | 0.002 | 0         | 19 MS4A1     |
| 953 | 0         | 1.548814 | 0.564 | 0.07  | 0         | 19 LTB       |
| 954 | 0         | 1.416858 | 0.315 | 0.011 | 0         | 19 IGHM      |
| 955 | 0         | 1.300752 | 0.41  | 0.025 | 0         | 19 CCR7      |
| 956 | 0         | 1.296693 | 0.406 | 0.003 | 0         | 19 TNFRSF13C |
| 957 | 0         | 1.209115 | 0.388 | 0.014 | 0         | 19 BANK1     |
| 958 | 0         | 1.162026 | 0.386 | 0.016 | 0         | 19 LY9       |
| 959 | 0         | 0.979493 | 0.299 | 0.002 | 0         | 19 VPREB3    |
| 960 | 0         | 0.889742 | 0.284 | 0.001 | 0         | 19 BLK       |
| 961 | 1.14E-294 | 0.917511 | 0.271 | 0.027 | 3.86E-290 | 19 CD79B     |
| 962 | 1.04E-288 | 0.840338 | 0.997 | 0.985 | 3.50E-284 | 19 RPL13A    |
| 963 | 1.60E-286 | 0.813217 | 0.284 | 0.031 | 5.40E-282 | 19 GNG7      |
| 964 | 9.54E-278 | 0.887025 | 0.989 | 0.967 | 3.22E-273 | 19 RPS23     |
| 965 | 1.50E-263 | 0.912713 | 0.986 | 0.964 | 5.07E-259 | 19 RPL23A    |
| 966 | 3.22E-263 | 0.831664 | 0.995 | 0.98  | 1.09E-258 | 19 RPS18     |
| 967 | 2.74E-262 | 0.923747 | 0.986 | 0.977 | 9.23E-258 | 19 RPS27     |
| 968 | 3.39E-261 | 0.884652 | 0.982 | 0.957 | 1.14E-256 | 19 RPS8      |
| 969 | 4.38E-256 | 0.89409  | 0.986 | 0.972 | 1.48E-251 | 19 RPLP2     |
| 970 | 1.32E-254 | 0.797251 | 0.992 | 0.97  | 4.45E-250 | 19 RPL11     |
| 971 | 2.30E-248 | 0.818858 | 0.988 | 0.958 | 7.76E-244 | 19 RPL30     |
| 972 | 5.94E-242 | 0.785327 | 0.983 | 0.981 | 2.00E-237 | 19 RPL21     |
| 973 | 1.63E-229 | 0.787143 | 0.986 | 0.961 | 5.49E-225 | 19 RPS15A    |
| 974 | 1.39E-225 | 0.835608 | 0.956 | 0.928 | 4.68E-221 | 19 RPS11     |
| 975 | 5.40E-221 | 0.813519 | 0.264 | 0.035 | 1.82E-216 | 19 ADAM28    |
| 976 | 2.88E-204 | 1.093082 | 0.395 | 0.084 | 9.71E-200 | 19 ARHGAP24  |
| 977 | 3.81E-203 | 0.85104  | 0.964 | 0.931 | 1.28E-198 | 19 RPS29     |
| 978 | 5.45E-202 | 1.34815  | 0.784 | 0.398 | 1.84E-197 | 19 CD37      |
| 979 | 2.06E-198 | 0.783343 | 0.97  | 0.931 | 6.94E-194 | 19 RPS5      |
| 980 | 3.09E-196 | 0.978871 | 0.932 | 0.843 | 1.04E-191 | 19 EEF1B2    |
| 981 | 1.02E-188 | 1.279139 | 0.839 | 0.439 | 3.44E-184 | 19 CXCR4     |
| 982 | 4.09E-187 | 0.866107 | 0.944 | 0.902 | 1.38E-182 | 19 RPSA      |
| 983 | 1.57E-180 | 0.944158 | 0.951 | 0.778 | 5.29E-176 | 19 CD74      |

|      |           |          |       |       |           |    |               |
|------|-----------|----------|-------|-------|-----------|----|---------------|
| 984  | 2.27E-146 | 1.021941 | 0.599 | 0.22  | 7.64E-142 | 19 | CD48          |
| 985  | 2.40E-138 | 0.865654 | 0.313 | 0.071 | 8.09E-134 | 19 | RP1-313I6.12  |
| 986  | 1.70E-124 | 1.200775 | 0.299 | 0.071 | 5.72E-120 | 19 | IGLC2         |
| 987  | 2.22E-120 | 1.349807 | 0.602 | 0.308 | 7.47E-116 | 19 | CD83          |
| 988  | 7.63E-120 | 0.834886 | 0.625 | 0.262 | 2.57E-115 | 19 | ISG20         |
| 989  | 2.70E-119 | 1.056477 | 0.869 | 0.858 | 9.09E-115 | 19 | BTG1          |
| 990  | 2.33E-109 | 0.823457 | 0.84  | 0.561 | 7.86E-105 | 19 | LAPTM5        |
| 991  | 2.38E-103 | 0.826916 | 0.482 | 0.177 | 8.03E-99  | 19 | RHOH          |
| 992  | 2.61E-100 | 0.800903 | 0.553 | 0.232 | 8.81E-96  | 19 | CORO1A        |
| 993  | 8.38E-89  | 1.23925  | 0.555 | 0.262 | 2.82E-84  | 19 | GPR183        |
| 994  | 6.30E-84  | 0.808796 | 0.745 | 0.513 | 2.12E-79  | 19 | HLA-DQB1      |
| 995  | 1.22E-71  | 0.917077 | 0.669 | 0.48  | 4.12E-67  | 19 | EZR           |
| 996  | 3.70E-71  | 1.059391 | 0.707 | 0.593 | 1.25E-66  | 19 | HERPUD1       |
| 997  | 7.79E-57  | 0.954491 | 0.568 | 0.416 | 2.63E-52  | 19 | YPEL5         |
| 998  | 9.04E-52  | 0.864819 | 0.415 | 0.234 | 3.05E-47  | 19 | IRF8          |
| 999  | 9.09E-45  | 0.806841 | 0.561 | 0.407 | 3.06E-40  | 19 | NR4A2         |
| 1000 | 8.53E-18  | 0.86891  | 0.368 | 0.299 | 2.87E-13  | 19 | SMIM14        |
| 1001 | 0         | 3.277173 | 0.895 | 0.092 | 0         | 20 | CAPS          |
| 1002 | 0         | 3.132083 | 0.88  | 0.145 | 0         | 20 | TPPP3         |
| 1003 | 0         | 3.096512 | 0.81  | 0.045 | 0         | 20 | C20orf85      |
| 1004 | 0         | 2.948751 | 0.764 | 0.051 | 0         | 20 | C9orf24       |
| 1005 | 0         | 2.903869 | 0.705 | 0.041 | 0         | 20 | C1orf194      |
| 1006 | 0         | 2.867083 | 0.681 | 0.044 | 0         | 20 | RSPH1         |
| 1007 | 0         | 2.721842 | 0.65  | 0.04  | 0         | 20 | FAM183A       |
| 1008 | 0         | 2.677554 | 0.615 | 0.05  | 0         | 20 | PIFO          |
| 1009 | 0         | 2.62045  | 0.505 | 0.045 | 0         | 20 | OMG           |
| 1010 | 0         | 2.615176 | 0.554 | 0.066 | 0         | 20 | GSTA1         |
| 1011 | 0         | 2.607342 | 0.582 | 0.033 | 0         | 20 | SNTN          |
| 1012 | 0         | 2.601966 | 0.626 | 0.05  | 0         | 20 | TMEM190       |
| 1013 | 0         | 2.516688 | 0.549 | 0.034 | 0         | 20 | CAPSL         |
| 1014 | 0         | 2.513788 | 0.56  | 0.04  | 0         | 20 | C5orf49       |
| 1015 | 0         | 2.487391 | 0.586 | 0.046 | 0         | 20 | C9orf116      |
| 1016 | 0         | 2.423408 | 0.534 | 0.034 | 0         | 20 | C11orf88      |
| 1017 | 0         | 2.313355 | 0.484 | 0.03  | 0         | 20 | CFAP126       |
| 1018 | 0         | 2.250553 | 0.477 | 0.032 | 0         | 20 | ROPN1L        |
| 1019 | 0         | 2.248654 | 0.47  | 0.036 | 0         | 20 | DYNLRB2       |
| 1020 | 0         | 2.242854 | 0.363 | 0.026 | 0         | 20 | RP11-356K23.1 |
| 1021 | 0         | 2.197861 | 0.431 | 0.032 | 0         | 20 | MORN5         |
| 1022 | 0         | 2.12999  | 0.449 | 0.036 | 0         | 20 | ZMYND10       |
| 1023 | 0         | 2.073979 | 0.42  | 0.032 | 0         | 20 | FAM92B        |
| 1024 | 0         | 2.001971 | 0.379 | 0.036 | 0         | 20 | RP11-295M3.4  |
| 1025 | 0         | 1.949663 | 0.357 | 0.034 | 0         | 20 | C11orf70      |
| 1026 | 0         | 1.928016 | 0.37  | 0.028 | 0         | 20 | TEKT1         |

|      |           |          |       |       |           |               |
|------|-----------|----------|-------|-------|-----------|---------------|
| 1027 | 0         | 1.917461 | 0.354 | 0.031 | 0         | 20 FAM216B    |
| 1028 | 2.57E-307 | 1.877083 | 0.35  | 0.033 | 8.66E-303 | 20 CCDC78     |
| 1029 | 1.90E-299 | 1.883004 | 0.35  | 0.033 | 6.40E-295 | 20 AC013264.2 |
| 1030 | 1.21E-282 | 2.18207  | 0.304 | 0.027 | 4.08E-278 | 20 GSTA2      |
| 1031 | 5.95E-262 | 2.702657 | 0.67  | 0.163 | 2.01E-257 | 20 MORN2      |
| 1032 | 3.86E-245 | 2.761327 | 0.746 | 0.234 | 1.30E-240 | 20 CETN2      |
| 1033 | 4.17E-223 | 2.001776 | 0.435 | 0.07  | 1.41E-218 | 20 TCTEX1D2   |
| 1034 | 1.60E-220 | 2.189246 | 0.492 | 0.09  | 5.39E-216 | 20 TSPAN1     |
| 1035 | 1.02E-218 | 2.199901 | 0.47  | 0.084 | 3.43E-214 | 20 CD24       |
| 1036 | 7.05E-208 | 2.059908 | 0.923 | 0.747 | 2.37E-203 | 20 GSTP1      |
| 1037 | 1.23E-206 | 2.027884 | 0.416 | 0.069 | 4.14E-202 | 20 SPA17      |
| 1038 | 1.03E-191 | 2.089156 | 0.497 | 0.107 | 3.48E-187 | 20 C12orf75   |
| 1039 | 1.37E-178 | 2.090177 | 0.51  | 0.116 | 4.62E-174 | 20 AGR3       |
| 1040 | 2.29E-169 | 2.049753 | 0.431 | 0.089 | 7.71E-165 | 20 FAM229B    |
| 1041 | 3.56E-163 | 2.399165 | 0.832 | 0.587 | 1.20E-158 | 20 PRDX5      |
| 1042 | 5.36E-159 | 1.992012 | 0.853 | 0.736 | 1.81E-154 | 20 DYNLL1     |
| 1043 | 4.92E-129 | 2.160419 | 0.449 | 0.122 | 1.66E-124 | 20 MRPS31     |
| 1044 | 2.12E-126 | 1.903871 | 0.376 | 0.086 | 7.15E-122 | 20 LRRC23     |
| 1045 | 9.12E-98  | 2.156902 | 0.543 | 0.238 | 3.07E-93  | 20 ODF3B      |
| 1046 | 6.38E-72  | 1.902369 | 0.665 | 0.542 | 2.15E-67  | 20 ATPIF1     |
| 1047 | 2.10E-67  | 1.897544 | 0.477 | 0.23  | 7.08E-63  | 20 IFT57      |
| 1048 | 1.00E-62  | 1.945748 | 0.637 | 0.531 | 3.39E-58  | 20 DYNLT1     |
| 1049 | 5.10E-62  | 1.965204 | 0.63  | 0.521 | 1.72E-57  | 20 UFC1       |
| 1050 | 6.73E-54  | 2.142079 | 0.593 | 0.47  | 2.27E-49  | 20 TUBB4B     |
| 1051 | 7.67E-221 | 2.304424 | 0.68  | 0.157 | 2.58E-216 | 21 KRT19      |
| 1052 | 2.58E-202 | 2.680017 | 0.432 | 0.064 | 8.69E-198 | 21 KRT17      |
| 1053 | 8.21E-129 | 2.383962 | 0.812 | 0.461 | 2.77E-124 | 21 SCGB3A1    |
| 1054 | 5.25E-127 | 2.756894 | 0.383 | 0.076 | 1.77E-122 | 21 S100A2     |
| 1055 | 1.58E-120 | 2.165167 | 0.284 | 0.044 | 5.32E-116 | 21 KRT15      |
| 1056 | 2.88E-105 | 0.757236 | 0.984 | 0.987 | 9.69E-101 | 21 RPLP1      |
| 1057 | 8.51E-102 | 0.748436 | 0.997 | 0.991 | 2.87E-97  | 21 EEF1A1     |
| 1058 | 1.22E-100 | 0.840096 | 0.943 | 0.975 | 4.11E-96  | 21 RPS6       |
| 1059 | 2.96E-92  | 1.835625 | 0.516 | 0.171 | 9.96E-88  | 21 WFDC2      |
| 1060 | 1.41E-83  | 1.941049 | 0.62  | 0.274 | 4.75E-79  | 21 SLPI       |
| 1061 | 9.11E-75  | 0.61925  | 0.969 | 0.986 | 3.07E-70  | 21 RPL13A     |
| 1062 | 5.90E-73  | 2.263313 | 0.391 | 0.119 | 1.99E-68  | 21 BPIFB1     |
| 1063 | 6.17E-72  | 0.6932   | 0.945 | 0.967 | 2.08E-67  | 21 RPL3       |
| 1064 | 1.87E-71  | 0.823076 | 0.872 | 0.936 | 6.29E-67  | 21 RPL7A      |
| 1065 | 7.38E-66  | 1.470564 | 0.411 | 0.142 | 2.49E-61  | 21 FXYD3      |
| 1066 | 3.69E-65  | 0.798749 | 0.867 | 0.943 | 1.24E-60  | 21 RPL10A     |
| 1067 | 1.20E-62  | 1.852671 | 0.651 | 0.442 | 4.05E-58  | 21 SCGB1A1    |
| 1068 | 3.91E-59  | 0.652307 | 0.917 | 0.971 | 1.32E-54  | 21 RPS3A      |
| 1069 | 2.19E-55  | 0.847024 | 0.802 | 0.915 | 7.38E-51  | 21 RPLP0      |

|      |          |          |       |       |          |    |            |
|------|----------|----------|-------|-------|----------|----|------------|
| 1070 | 2.94E-51 | 1.57773  | 0.341 | 0.119 | 9.92E-47 | 21 | CXCL17     |
| 1071 | 4.69E-50 | 0.842199 | 0.805 | 0.917 | 1.58E-45 | 21 | RPL5       |
| 1072 | 1.02E-49 | 0.709447 | 0.87  | 0.956 | 3.45E-45 | 21 | RPS17      |
| 1073 | 2.37E-49 | 1.201153 | 0.724 | 0.749 | 7.98E-45 | 21 | GSTP1      |
| 1074 | 2.07E-46 | 1.625643 | 0.404 | 0.179 | 6.98E-42 | 21 | KRT18      |
| 1075 | 1.55E-44 | 1.585641 | 0.63  | 0.518 | 5.23E-40 | 21 | CYB5A      |
| 1076 | 2.51E-41 | 0.736727 | 0.797 | 0.903 | 8.46E-37 | 21 | RPSA       |
| 1077 | 4.61E-41 | 1.438546 | 0.318 | 0.12  | 1.55E-36 | 21 | KRT7       |
| 1078 | 6.70E-39 | 0.636891 | 0.836 | 0.943 | 2.26E-34 | 21 | RPL29      |
| 1079 | 1.01E-35 | 0.668474 | 0.802 | 0.933 | 3.41E-31 | 21 | RPL24      |
| 1080 | 6.29E-35 | 0.639504 | 0.805 | 0.933 | 2.12E-30 | 21 | RPS5       |
| 1081 | 1.44E-34 | 1.474613 | 0.349 | 0.161 | 4.85E-30 | 21 | KRT8       |
| 1082 | 6.32E-29 | 1.486995 | 0.284 | 0.12  | 2.13E-24 | 21 | AGR2       |
| 1083 | 1.23E-26 | 0.658543 | 0.745 | 0.922 | 4.14E-22 | 21 | GNB2L1     |
| 1084 | 2.07E-23 | 0.707812 | 0.698 | 0.88  | 6.98E-19 | 21 | RPL4       |
| 1085 | 5.52E-19 | 1.958206 | 0.312 | 0.177 | 1.86E-14 | 21 | SCGB3A2    |
| 1086 | 2.42E-18 | 1.402155 | 0.292 | 0.166 | 8.16E-14 | 21 | PERP       |
| 1087 | 8.82E-15 | 1.196062 | 0.255 | 0.142 | 2.97E-10 | 21 | TACSTD2    |
| 1088 | 4.19E-14 | 0.630574 | 0.292 | 0.163 | 1.41E-09 | 21 | SFTPB      |
| 1089 | 4.45E-14 | 0.620632 | 0.695 | 0.868 | 1.50E-09 | 21 | ACTG1      |
| 1090 | 3.08E-12 | 0.714549 | 0.148 | 0.385 | 1.04E-07 | 21 | TUBA1C     |
| 1091 | 7.00E-10 | 0.61713  | 0.26  | 0.563 | 2.36E-05 | 21 | LDHB       |
| 1092 | 9.31E-10 | 0.642158 | 0.115 | 0.29  | 3.14E-05 | 21 | IMPDH2     |
| 1093 | 1.04E-08 | 0.659716 | 0.279 | 0.595 | 0.000349 | 21 | PKM        |
| 1094 | 4.92E-08 | 0.678267 | 0.263 | 0.547 | 0.001657 | 21 | XBP1       |
| 1095 | 9.29E-08 | 0.807477 | 0.193 | 0.406 | 0.003129 | 21 | DUSP23     |
| 1096 | 4.68E-07 | 1.194734 | 0.268 | 0.206 | 0.015759 | 21 | ID1        |
| 1097 | 4.03E-06 | 0.779085 | 0.122 | 0.256 | 0.135802 | 21 | OAT        |
| 1098 | 0.000706 | 0.762707 | 0.169 | 0.294 | 1        | 21 | PRDX2      |
| 1099 | 0.001296 | 0.755146 | 0.273 | 0.246 | 1        | 21 | ADIRF      |
| 1100 | 0.005357 | 1.021025 | 0.328 | 0.356 | 1        | 21 | MGST1      |
| 1101 | 0        | 5.682    | 0.597 | 0.03  | 0        | 22 | IGHG1      |
| 1102 | 0        | 5.458582 | 0.869 | 0.033 | 0        | 22 | JCHAIN     |
| 1103 | 0        | 5.445249 | 0.613 | 0.031 | 0        | 22 | IGHG3      |
| 1104 | 0        | 4.116146 | 0.529 | 0.016 | 0        | 22 | IGHG4      |
| 1105 | 0        | 3.905804 | 0.461 | 0.005 | 0        | 22 | IGHG2      |
| 1106 | 0        | 3.53066  | 0.361 | 0.004 | 0        | 22 | IGHA2      |
| 1107 | 0        | 3.202995 | 0.932 | 0.01  | 0        | 22 | MZB1       |
| 1108 | 0        | 2.667276 | 0.393 | 0.001 | 0        | 22 | IGHGP      |
| 1109 | 0        | 1.531951 | 0.675 | 0.012 | 0        | 22 | CD79A      |
| 1110 | 0        | 1.448476 | 0.691 | 0.015 | 0        | 22 | DERL3      |
| 1111 | 0        | 1.126758 | 0.319 | 0.002 | 0        | 22 | AL928768.3 |
| 1112 | 0        | 1.101765 | 0.602 | 0.021 | 0        | 22 | CD27       |

|      |           |          |       |       |           |              |
|------|-----------|----------|-------|-------|-----------|--------------|
| 1113 | 0         | 0.885246 | 0.387 | 0.002 | 0         | 22 JSRP1     |
| 1114 | 0         | 0.808817 | 0.33  | 0     | 0         | 22 IGLV3-1   |
| 1115 | 0         | 0.717403 | 0.44  | 0.011 | 0         | 22 SPAG4     |
| 1116 | 0         | 0.662484 | 0.466 | 0.001 | 0         | 22 FCRL5     |
| 1117 | 0         | 0.584818 | 0.356 | 0.001 | 0         | 22 TNFRSF17  |
| 1118 | 0         | 0.523021 | 0.419 | 0.015 | 0         | 22 POU2AF1   |
| 1119 | 2.23E-206 | 4.373159 | 0.283 | 0.014 | 7.51E-202 | 22 IGHM      |
| 1120 | 2.16E-187 | 7.100546 | 0.838 | 0.166 | 7.28E-183 | 22 IGKC      |
| 1121 | 6.33E-177 | 1.266871 | 0.675 | 0.094 | 2.13E-172 | 22 ITM2C     |
| 1122 | 2.80E-170 | 1.670162 | 0.859 | 0.179 | 9.44E-166 | 22 FKBP11    |
| 1123 | 2.46E-154 | 6.184747 | 0.592 | 0.086 | 8.28E-150 | 22 IGHA1     |
| 1124 | 5.31E-145 | 0.493428 | 0.262 | 0.017 | 1.79E-140 | 22 RAB30     |
| 1125 | 6.10E-115 | 0.528152 | 0.414 | 0.05  | 2.05E-110 | 22 CD38      |
| 1126 | 3.84E-110 | 2.111699 | 0.969 | 0.714 | 1.29E-105 | 22 SSR4      |
| 1127 | 3.88E-108 | 6.070756 | 0.387 | 0.049 | 1.31E-103 | 22 IGLC3     |
| 1128 | 8.22E-99  | 0.685627 | 0.55  | 0.095 | 2.77E-94  | 22 PIM2      |
| 1129 | 7.46E-95  | 1.435549 | 0.832 | 0.335 | 2.51E-90  | 22 PRDX4     |
| 1130 | 2.11E-88  | 6.144324 | 0.429 | 0.073 | 7.12E-84  | 22 IGLC2     |
| 1131 | 4.28E-82  | 0.56889  | 0.545 | 0.111 | 1.44E-77  | 22 TPD52     |
| 1132 | 3.24E-77  | 0.593687 | 0.419 | 0.069 | 1.09E-72  | 22 SDC1      |
| 1133 | 2.14E-75  | 1.294009 | 0.33  | 0.047 | 7.20E-71  | 22 DNAAF1    |
| 1134 | 1.55E-74  | 1.326105 | 0.817 | 0.381 | 5.21E-70  | 22 SEC11C    |
| 1135 | 7.00E-67  | 1.519172 | 0.885 | 0.594 | 2.36E-62  | 22 HERPUD1   |
| 1136 | 1.46E-42  | 0.642227 | 0.539 | 0.185 | 4.91E-38  | 22 PLPP5     |
| 1137 | 5.59E-42  | 0.643232 | 0.623 | 0.243 | 1.88E-37  | 22 CRELD2    |
| 1138 | 3.08E-41  | 0.703196 | 0.681 | 0.266 | 1.04E-36  | 22 ISG20     |
| 1139 | 4.67E-40  | 1.078997 | 0.812 | 0.543 | 1.58E-35  | 22 XBP1      |
| 1140 | 1.43E-39  | 0.473504 | 0.555 | 0.2   | 4.83E-35  | 22 TXNDC15   |
| 1141 | 1.33E-38  | 0.559633 | 0.403 | 0.112 | 4.48E-34  | 22 HIST1H1C  |
| 1142 | 2.10E-33  | 0.845635 | 0.796 | 0.513 | 7.07E-29  | 22 FKBP2     |
| 1143 | 7.08E-30  | 0.70774  | 0.555 | 0.238 | 2.39E-25  | 22 LINC00152 |
| 1144 | 1.85E-25  | 0.604251 | 0.675 | 0.373 | 6.25E-21  | 22 SDF2L1    |
| 1145 | 2.78E-22  | 0.528228 | 0.775 | 0.554 | 9.36E-18  | 22 SPCS2     |
| 1146 | 2.88E-20  | 0.525359 | 0.623 | 0.355 | 9.71E-16  | 22 DNAJB9    |
| 1147 | 4.54E-20  | 0.551223 | 0.66  | 0.424 | 1.53E-15  | 22 SPCS3     |
| 1148 | 5.98E-20  | 0.570405 | 0.66  | 0.403 | 2.02E-15  | 22 MANF      |
| 1149 | 2.94E-17  | 0.517105 | 0.743 | 0.516 | 9.91E-13  | 22 SSR3      |
| 1150 | 3.05E-15  | 0.797749 | 0.785 | 0.611 | 1.03E-10  | 22 HSP90B1   |

**Table S4: Proliferating Cells in Control and IPF Lungs**

|                                | Healthy lungs:                                                                                                                                                                          | IPF upper lobe:      | IPF lower lobe:      |
|--------------------------------|-----------------------------------------------------------------------------------------------------------------------------------------------------------------------------------------|----------------------|----------------------|
| <b>Cell Identity</b>           | <b>Number of proliferating cells (% of proliferating cell/total cells of that cell type in each tissue type)<br/>[% of proliferating cells/total macrophages in each tissue type]*.</b> |                      |                      |
| SPP1 <sup>hi</sup> Macrophage  | 2 (0.072%)[0.023%]                                                                                                                                                                      | 42 (2.007%)[0.994%]  | 149 (3.502%)[2.799%] |
| FABP4 <sup>hi</sup> Macrophage | 169 (4.061%)[1.965%]                                                                                                                                                                    | 176 (10.59%)[4.165%] | 89 (16.952%)[1.672%] |
| FCN1 <sup>hi</sup> Macrophage  | 35 (2.122%)[.407%]                                                                                                                                                                      | 12 (2.548%)[0.284%]  | 16 (2.941%)[0.301%]  |
| Club                           | 1 (0.633%)                                                                                                                                                                              | 3 (1.546%)           | 11 (1.278%)          |
| AT1                            | 0 (0%)                                                                                                                                                                                  | 1 (5.556%)           | 3 (5.769%)           |
| AT2                            | 3 (0.565%)                                                                                                                                                                              | 1 (0.375%)           | 0 (0%)               |
| Basal                          | 0 (0%)                                                                                                                                                                                  | 1 (1.493%)           | 33 (4.641%)          |
| Ciliated                       | 0 (0%)                                                                                                                                                                                  | 0 (0%)               | 3 (0.422%)           |
| T cell                         | 4 (0.145%)                                                                                                                                                                              | 12 (0.731%)          | 12 (0.48%)           |
| Endothelial                    | 5 (0.325%)                                                                                                                                                                              | 10 (0.696%)          | 4 (0.17%)            |
| NK cell                        | 14 (3.423%)                                                                                                                                                                             | 2 (0.405%)           | 2 (0.707%)           |
| Fibroblast                     | 2 (0.458%)                                                                                                                                                                              | 2 (0.464%)           | 11 (0.556%)          |
| * Macrophages only             |                                                                                                                                                                                         |                      |                      |

**Table S5. Proportion of gene expression in digested cells compared to undigested lung tissues**

| Marker Gene | Cell Type                  | Mean proportion expression* (%BulkCell/%BulkTissue) | Standard deviation (%BulkCell/%BulkTissue) |
|-------------|----------------------------|-----------------------------------------------------|--------------------------------------------|
| CD163       | Macrophage                 | 5.53                                                | 4.21                                       |
| AIF1        | Macrophage/Dendritic Cell  | 2.30                                                | 0.95                                       |
| CD68        | Macrophage                 | 5.90                                                | 2.28                                       |
| CD1C        | Dendritic Cell             | 0.82                                                | 0.25                                       |
| TPSAB1      | Mast Cell                  | 0.72                                                | 0.46                                       |
| GNLY        | Natural Killer Cell        | 2.67                                                | 2.80                                       |
| NKG7        | Natural Killer Cell        | 2.45                                                | 2.59                                       |
| CD3D        | T Cell                     | 1.03                                                | 0.57                                       |
| CD4         | T Helper Cell              | 1.89                                                | 1.08                                       |
| CD8A        | Cytotoxic T Cell           | 1.33                                                | 0.78                                       |
| MS4A1       | B Cell                     | 0.73                                                | 0.79                                       |
| IGKC        | Plasma Cell                | 0.10                                                | 0.09                                       |
| JCHAIN      | Plasma Cell                | 0.13                                                | 0.10                                       |
| VWF         | Endothelial Cell           | 0.41                                                | 0.15                                       |
| CLDN5       | Endothelial Cell           | 0.21                                                | 0.11                                       |
| LYVE1       | Lymphatic Endothelial Cell | 0.62                                                | 0.48                                       |
| FOXJ1       | Ciliated Cell              | 5.97                                                | 11.00                                      |
| TPPP3       | Ciliated Cell              | 2.09                                                | 3.26                                       |
| SFTPC       | AT2                        | 0.51                                                | 0.46                                       |
| AGER        | AT1                        | 0.25                                                | 0.27                                       |
| SCGB3A2     | Club Cell                  | 4.66                                                | 8.71                                       |
| SCGB1A1     | Club Cell                  | 5.29                                                | 7.13                                       |
| MUC5B       | Goblet Cell                | 9.68                                                | 15.13                                      |
| KRT5        | Basal Cell                 | 24.81                                               | 59.53                                      |
| DES         | Smooth Muscle Cell         | 0.02                                                | 0.01                                       |
| RGS5        | Pericyte                   | 0.26                                                | 0.25                                       |
| RERGL       | Pericyte                   | 0.20                                                | 0.21                                       |
| COL1A1      | Fibroblast                 | 0.29                                                | 0.34                                       |
| SFRP2       | Fibroblast                 | 0.15                                                | 0.06                                       |
| PDGFRA      | Fibroblast                 | 0.18                                                | 0.17                                       |

\*Proportion is calculated by normalized expression in RNA-seq from digested tissue compared to tissue before digestion. These values represent the mean and standard deviation of two control and two IPF lungs

Table S6A  
Table S6B

See Table at ERJ website or:

<https://dom.pitt.edu/rheum/centers-institutes/scleroderma/systemicsclerosiscenter/database/>



**Table S7: Genes upregulated in SPP1<sup>hi</sup> macrophages**

| <b>Gene</b>    | <b>IPF/healthy fold-change</b> |
|----------------|--------------------------------|
| LEP            | no denominator                 |
| RP4-644L1.2    | no denominator                 |
| KCNJ5          | 15.76                          |
| HS3ST2         | 15.58                          |
| AC145110.1     | 15.28                          |
| L3MBTL4-AS1    | 10.99                          |
| VIL1           | 10.15                          |
| COL4A2-AS2     | 7.83                           |
| MREG           | 7.70                           |
| SDC3           | 7.57                           |
| SPP1           | 7.56                           |
| DFNA5          | 7.45                           |
| SIGLEC15       | 7.43                           |
| ATP6V0D2       | 7.12                           |
| GSDMA          | 6.79                           |
| SMPDL3A        | 6.29                           |
| LGMN           | 6.07                           |
| CD84           | 5.93                           |
| HTRA4          | 5.55                           |
| TM4SF19-TCTEX1 | 5.36                           |
| ALK            | 5.36                           |
| TMEM37         | 5.02                           |
| FOLR2          | 4.97                           |
| MERTK          | 4.96                           |
| SLC29A1        | 4.49                           |
| NR1H3          | 4.17                           |
| RP11-184M15.1  | 4.13                           |
| LILRB4         | 3.97                           |
| MMP9           | 3.81                           |
| CMKLR1         | 3.71                           |
| SDC2           | 3.57                           |
| SLC29A3        | 3.28                           |
| TM4SF19        | 3.24                           |
| FAM20C         | 3.19                           |
| CRYBB1         | 3.08                           |
| CTSZ           | 2.88                           |
| ZMIZ1-AS1      | 2.83                           |
| DOPEY2         | 2.73                           |
| GPNMB          | 2.72                           |
| MS4A6E         | 2.69                           |

|              |      |
|--------------|------|
| RP11-20G13.3 | 2.66 |
| ACP2         | 2.61 |
| FCHO2        | 2.54 |
| SLC26A11     | 2.43 |
| ZNF385A      | 2.41 |
| APOE         | 2.38 |
| AP000695.4   | 2.29 |
| SCARB1       | 2.18 |
| DAB2         | 2.17 |
| SLC1A3       | 2.14 |
| GM2A         | 2.13 |
| SLC36A1      | 2.02 |

**Table S8. Regulation of genes by SPP1hi macrophages (filtered for minimal expression>0.5 by SPP1 LOWER lobe macrophages).**

| Gene           | 1-SPP1             | 1-SPP1                | 1-SPP1                | SPP1 lower lobe/control | SPP1 upper lobe/control |
|----------------|--------------------|-----------------------|-----------------------|-------------------------|-------------------------|
|                | macrophages NORMAL | macrophages IPF UPPER | macrophages IPF LOWER |                         |                         |
| CTSK           | 0.04               | 0.37                  | 1.34                  | 32.20                   | 8.92                    |
| RARRES1        | 0.03               | 0.29                  | 0.71                  | 21.77                   | 9.09                    |
| CHI3L1         | 0.09               | 0.55                  | 1.83                  | 20.35                   | 6.08                    |
| HS3ST2         | 0.06               | 0.40                  | 0.88                  | 15.58                   | 7.06                    |
| MMP7           | 0.10               | 0.30                  | 1.26                  | 13.23                   | 3.17                    |
| TDRD3          | 0.07               | 0.59                  | 0.85                  | 12.19                   | 8.46                    |
| IGLC2          | 0.08               | 0.10                  | 0.69                  | 9.06                    | 1.33                    |
| CHIT1          | 0.12               | 1.11                  | 1.08                  | 8.89                    | 9.15                    |
| IGKC           | 0.13               | 0.25                  | 1.18                  | 8.80                    | 1.84                    |
| PLTP           | 0.16               | 0.64                  | 1.30                  | 8.03                    | 3.94                    |
| SPARC          | 0.14               | 0.32                  | 1.10                  | 7.97                    | 2.35                    |
| SPP1           | 5.84               | 14.87                 | 44.14                 | 7.56                    | 2.55                    |
| FN1            | 1.13               | 6.44                  | 7.59                  | 6.71                    | 5.69                    |
| SMPDL3A        | 0.12               | 0.37                  | 0.73                  | 6.29                    | 3.17                    |
| LGMN           | 1.30               | 4.19                  | 7.86                  | 6.07                    | 3.23                    |
| CCL18          | 8.20               | 26.47                 | 49.29                 | 6.01                    | 3.23                    |
| CD84           | 0.25               | 1.13                  | 1.49                  | 5.93                    | 4.51                    |
| SCGB3A1        | 0.47               | 1.30                  | 2.47                  | 5.20                    | 2.73                    |
| HLA-DQA1       | 2.05               | 8.17                  | 10.58                 | 5.16                    | 3.99                    |
| FOLR2          | 0.28               | 0.67                  | 1.40                  | 4.97                    | 2.37                    |
| MERTK          | 0.13               | 0.39                  | 0.65                  | 4.96                    | 2.92                    |
| SEPP1          | 0.73               | 1.92                  | 3.55                  | 4.84                    | 2.62                    |
| RP11-1008C21.1 | 0.11               | 0.43                  | 0.53                  | 4.71                    | 3.87                    |
| C1orf54        | 0.14               | 0.35                  | 0.65                  | 4.67                    | 2.55                    |
| SLC40A1        | 0.13               | 0.46                  | 0.60                  | 4.54                    | 3.48                    |
| SLC29A1        | 0.12               | 0.29                  | 0.53                  | 4.49                    | 2.47                    |
| MTSS1          | 0.13               | 0.38                  | 0.57                  | 4.29                    | 2.89                    |
| VAMP5          | 0.24               | 0.79                  | 1.01                  | 4.22                    | 3.28                    |
| NR1H3          | 0.21               | 0.67                  | 0.86                  | 4.17                    | 3.23                    |
| LILRB4         | 0.50               | 1.53                  | 1.98                  | 3.97                    | 3.06                    |
| MMP9           | 0.20               | 0.39                  | 0.77                  | 3.81                    | 1.95                    |
| SDC2           | 0.96               | 2.02                  | 3.42                  | 3.57                    | 2.11                    |
| CCL4L2         | 0.56               | 0.89                  | 1.99                  | 3.55                    | 1.60                    |
| FCGR1A         | 0.30               | 0.87                  | 1.03                  | 3.42                    | 2.88                    |
| A2M            | 0.36               | 0.84                  | 1.21                  | 3.38                    | 2.34                    |
| C2             | 0.16               | 0.32                  | 0.52                  | 3.26                    | 1.99                    |
| TNS1           | 0.17               | 0.32                  | 0.54                  | 3.21                    | 1.93                    |

|          |       |       |       |      |      |
|----------|-------|-------|-------|------|------|
| FAM20C   | 0.17  | 0.40  | 0.54  | 3.19 | 2.35 |
| SDS      | 0.35  | 1.14  | 1.10  | 3.12 | 3.23 |
| NUPR1    | 1.34  | 2.08  | 4.10  | 3.06 | 1.55 |
| CCL3L3   | 0.45  | 0.53  | 1.32  | 2.98 | 1.18 |
| SCD      | 0.45  | 1.08  | 1.32  | 2.95 | 2.42 |
| CTSZ     | 2.94  | 7.43  | 8.44  | 2.88 | 2.53 |
| CD48     | 0.38  | 0.60  | 1.09  | 2.87 | 1.58 |
| IFI27    | 0.85  | 1.03  | 2.43  | 2.86 | 1.21 |
| CPM      | 0.99  | 2.15  | 2.77  | 2.80 | 2.17 |
| PLEKHO1  | 0.18  | 0.24  | 0.51  | 2.78 | 1.30 |
| RBP4     | 0.21  | 0.30  | 0.57  | 2.74 | 1.43 |
| GPNMB    | 4.70  | 8.29  | 12.81 | 2.72 | 1.76 |
| TSC22D1  | 0.58  | 0.65  | 1.51  | 2.63 | 1.12 |
| ACP2     | 0.31  | 0.81  | 0.82  | 2.61 | 2.56 |
| HK2      | 0.25  | 0.27  | 0.63  | 2.54 | 1.10 |
| NTAN1    | 0.54  | 0.90  | 1.32  | 2.47 | 1.67 |
| FRMD4B   | 0.23  | 0.41  | 0.55  | 2.43 | 1.83 |
| ALDH1A1  | 0.43  | 0.59  | 1.04  | 2.43 | 1.38 |
| TNFSF13B | 0.58  | 1.22  | 1.38  | 2.38 | 2.10 |
| APOE     | 21.31 | 46.36 | 50.76 | 2.38 | 2.18 |
| CD4      | 0.31  | 0.60  | 0.74  | 2.37 | 1.92 |
| MAF      | 0.23  | 0.39  | 0.53  | 2.32 | 1.70 |
| TMEM176B | 0.66  | 0.87  | 1.52  | 2.31 | 1.32 |
| ABCA1    | 0.45  | 0.81  | 1.03  | 2.31 | 1.82 |
| ARID5B   | 0.77  | 1.06  | 1.77  | 2.30 | 1.38 |
| IRF1     | 0.33  | 1.27  | 0.75  | 2.29 | 3.87 |
| SLPI     | 0.24  | 0.13  | 0.54  | 2.27 | 0.54 |
| GPR34    | 0.31  | 0.51  | 0.69  | 2.25 | 1.68 |
| TPST2    | 0.28  | 0.51  | 0.61  | 2.21 | 1.85 |
| MARCKS   | 0.82  | 1.19  | 1.80  | 2.19 | 1.44 |
| DAB2     | 1.95  | 3.43  | 4.23  | 2.17 | 1.76 |
| FYB      | 0.71  | 1.37  | 1.51  | 2.15 | 1.94 |
| SLC1A3   | 0.44  | 0.75  | 0.95  | 2.14 | 1.69 |
| CFD      | 1.73  | 2.35  | 3.69  | 2.14 | 1.36 |
| GM2A     | 0.67  | 1.24  | 1.43  | 2.13 | 1.85 |
| AP1S2    | 1.02  | 1.80  | 2.17  | 2.12 | 1.76 |
| MGLL     | 0.39  | 0.89  | 0.81  | 2.11 | 2.31 |
| NRP2     | 0.34  | 0.47  | 0.70  | 2.09 | 1.40 |
| NUDT16   | 0.38  | 0.81  | 0.78  | 2.08 | 2.15 |
| MITF     | 0.29  | 0.43  | 0.59  | 2.06 | 1.51 |
| TMEM176A | 0.45  | 0.54  | 0.93  | 2.06 | 1.19 |
| RHOC     | 0.59  | 0.85  | 1.21  | 2.03 | 1.44 |

|          |       |       |       |      |      |
|----------|-------|-------|-------|------|------|
| APOC1    | 21.38 | 45.29 | 42.75 | 2.00 | 2.12 |
| PRCP     | 0.44  | 0.64  | 0.88  | 1.99 | 1.46 |
| RGS1     | 2.26  | 3.46  | 4.47  | 1.98 | 1.53 |
| MS4A4A   | 2.57  | 2.99  | 5.07  | 1.97 | 1.16 |
| CD59     | 1.69  | 1.97  | 3.31  | 1.96 | 1.17 |
| NCF1     | 0.41  | 0.36  | 0.81  | 1.95 | 0.86 |
| FNIP2    | 1.04  | 1.52  | 2.03  | 1.95 | 1.46 |
| TBC1D1   | 0.26  | 0.39  | 0.51  | 1.94 | 1.49 |
| SGK1     | 1.93  | 3.23  | 3.73  | 1.94 | 1.68 |
| MATK     | 0.29  | 0.47  | 0.56  | 1.94 | 1.63 |
| SLAMF8   | 0.26  | 0.44  | 0.51  | 1.93 | 1.68 |
| CALM3    | 2.12  | 3.41  | 4.09  | 1.93 | 1.61 |
| LHFPL2   | 0.44  | 0.72  | 0.84  | 1.92 | 1.64 |
| TREM2    | 1.66  | 3.21  | 3.18  | 1.92 | 1.94 |
| PLBD1    | 0.60  | 1.12  | 1.14  | 1.89 | 1.87 |
| ANXA4    | 1.16  | 1.46  | 2.19  | 1.89 | 1.26 |
| GPR137B  | 0.63  | 0.98  | 1.18  | 1.87 | 1.56 |
| CIR1     | 0.42  | 0.74  | 0.79  | 1.87 | 1.76 |
| TNS3     | 0.42  | 0.68  | 0.79  | 1.86 | 1.60 |
| ASAP1    | 0.41  | 0.55  | 0.76  | 1.86 | 1.36 |
| PQLC3    | 0.32  | 0.55  | 0.60  | 1.86 | 1.70 |
| CREBRF   | 0.27  | 0.35  | 0.50  | 1.86 | 1.28 |
| CREBL2   | 0.29  | 0.39  | 0.54  | 1.85 | 1.32 |
| FUCA1    | 0.44  | 0.54  | 0.81  | 1.84 | 1.23 |
| NMB      | 0.48  | 1.18  | 0.89  | 1.83 | 2.43 |
| HLA-DPB1 | 10.89 | 18.39 | 19.85 | 1.82 | 1.69 |
| RDX      | 0.65  | 0.91  | 1.16  | 1.80 | 1.41 |
| SMIM20   | 0.35  | 0.51  | 0.63  | 1.80 | 1.46 |
| FOXP1    | 0.28  | 0.37  | 0.50  | 1.79 | 1.32 |
| C3AR1    | 0.77  | 0.80  | 1.37  | 1.79 | 1.05 |
| KLF2     | 0.36  | 0.56  | 0.64  | 1.78 | 1.56 |
| SMIM3    | 1.06  | 1.40  | 1.88  | 1.77 | 1.32 |
| RGS10    | 1.71  | 2.28  | 3.00  | 1.76 | 1.34 |
| SMAP2    | 0.60  | 0.76  | 1.06  | 1.75 | 1.26 |
| FABP3    | 0.60  | 0.74  | 1.05  | 1.75 | 1.24 |
| PLA2G7   | 1.20  | 2.81  | 2.08  | 1.74 | 2.35 |
| RALA     | 0.85  | 1.09  | 1.47  | 1.74 | 1.29 |
| PEA15    | 0.45  | 0.63  | 0.79  | 1.73 | 1.38 |
| TGFB1    | 1.65  | 2.83  | 2.84  | 1.73 | 1.72 |
| SLC38A6  | 0.30  | 0.50  | 0.51  | 1.72 | 1.70 |
| CHST11   | 0.50  | 0.79  | 0.86  | 1.72 | 1.59 |
| TSPAN4   | 0.54  | 0.77  | 0.92  | 1.71 | 1.42 |

|          |        |         |        |      |      |
|----------|--------|---------|--------|------|------|
| PSAP     | 14.53  | 21.08   | 24.83  | 1.71 | 1.45 |
| IFI16    | 0.65   | 0.87    | 1.12   | 1.71 | 1.33 |
| BCAT1    | 0.69   | 0.95    | 1.18   | 1.70 | 1.38 |
| ADAM10   | 0.50   | 0.65    | 0.85   | 1.70 | 1.29 |
| CD9      | 4.26   | 5.66    | 7.22   | 1.69 | 1.33 |
| SRD5A3   | 0.31   | 0.57    | 0.53   | 1.68 | 1.81 |
| MT-CO1   | 84.29  | 116.85  | 141.71 | 1.68 | 1.39 |
| FDX1     | 1.10   | 1.92    | 1.86   | 1.68 | 1.74 |
| CD14     | 2.24   | 2.01    | 3.76   | 1.68 | 0.90 |
| CCR1     | 0.32   | 0.51    | 0.54   | 1.68 | 1.60 |
| HLA-DRB1 | 10.50  | 16.26   | 17.58  | 1.67 | 1.55 |
| CTSL     | 9.97   | 11.68   | 16.64  | 1.67 | 1.17 |
| CCL13    | 1.01   | 1.39    | 1.68   | 1.67 | 1.38 |
| TCN2     | 0.39   | 0.53    | 0.65   | 1.67 | 1.36 |
| MS4A6A   | 2.67   | 3.57    | 4.45   | 1.67 | 1.34 |
| SNCA     | 0.32   | 0.48    | 0.53   | 1.66 | 1.52 |
| CCL4     | 1.72   | 1.35    | 2.85   | 1.65 | 0.79 |
| LY86     | 0.70   | 1.00    | 1.16   | 1.65 | 1.43 |
| LIPA     | 2.59   | 3.80    | 4.27   | 1.65 | 1.46 |
| DHRS7    | 0.57   | 0.72    | 0.94   | 1.64 | 1.26 |
| CD99     | 2.23   | 3.08    | 3.66   | 1.64 | 1.38 |
| CXCR4    | 2.30   | 2.05    | 3.75   | 1.63 | 0.89 |
| TSPAN14  | 0.46   | 0.67    | 0.75   | 1.63 | 1.45 |
| CSTB     | 24.61  | 38.95   | 39.82  | 1.62 | 1.58 |
| CPVL     | 0.74   | 0.80    | 1.19   | 1.61 | 1.08 |
| LPL      | 1.27   | 1.74    | 2.03   | 1.60 | 1.37 |
| CECR1    | 0.71   | 0.66    | 1.13   | 1.60 | 0.93 |
| WDR26    | 0.44   | 0.51    | 0.70   | 1.60 | 1.17 |
| MT-CYB   | 27.53  | 35.67   | 43.87  | 1.59 | 1.30 |
| CD86     | 0.52   | 0.84    | 0.82   | 1.59 | 1.64 |
| C15orf48 | 2.32   | 3.47    | 3.68   | 1.58 | 1.49 |
| SNX5     | 0.61   | 0.81    | 0.96   | 1.58 | 1.33 |
| CD36     | 0.80   | 1.45    | 1.26   | 1.58 | 1.81 |
| HLA-DMB  | 2.20   | 2.49    | 3.46   | 1.57 | 1.14 |
| GNB4     | 0.58   | 0.84    | 0.91   | 1.57 | 1.45 |
| NAP1L1   | 2.40   | 2.88    | 3.77   | 1.57 | 1.20 |
| NPC2     | 15.50  | 19.79   | 24.12  | 1.56 | 1.28 |
| ACTG1    | 9.66   | 13.41   | 15.03  | 1.56 | 1.39 |
| ZFP36L2  | 2.51   | 3.45    | 3.90   | 1.55 | 1.37 |
| TTYH3    | 0.46   | 0.59    | 0.71   | 1.55 | 1.28 |
| HLA-DRA  | 34.22  | 43.61   | 52.88  | 1.55 | 1.27 |
| FTL      | 634.64 | 1089.04 | 974.72 | 1.54 | 1.72 |

|          |       |       |       |      |      |
|----------|-------|-------|-------|------|------|
| PLEK     | 0.67  | 0.90  | 1.03  | 1.53 | 1.34 |
| CD37     | 1.30  | 1.84  | 1.99  | 1.53 | 1.41 |
| SNX6     | 0.67  | 0.83  | 1.03  | 1.52 | 1.24 |
| ZFAND5   | 3.47  | 5.03  | 5.28  | 1.52 | 1.45 |
| MT-CO3   | 50.73 | 67.46 | 77.16 | 1.52 | 1.33 |
| UCP2     | 0.93  | 1.47  | 1.41  | 1.52 | 1.58 |
| IL10     | 0.38  | 0.43  | 0.57  | 1.52 | 1.14 |
| IQGAP2   | 0.64  | 0.79  | 0.97  | 1.51 | 1.24 |
| TIMP2    | 1.17  | 1.63  | 1.77  | 1.51 | 1.39 |
| STAT1    | 0.41  | 0.75  | 0.62  | 1.51 | 1.81 |
| MARCO    | 6.04  | 7.20  | 9.08  | 1.50 | 1.19 |
| TPM4     | 2.45  | 3.15  | 3.68  | 1.50 | 1.29 |
| FABP5    | 13.89 | 18.52 | 20.84 | 1.50 | 1.33 |
| AHNAK    | 1.58  | 1.67  | 2.37  | 1.50 | 1.06 |
| HLA-DPA1 | 12.08 | 18.36 | 18.07 | 1.50 | 1.52 |
| ACOT13   | 0.43  | 0.64  | 0.64  | 1.50 | 1.48 |
| VAT1     | 0.90  | 1.49  | 1.34  | 1.49 | 1.66 |
| MT-ND4   | 52.50 | 67.51 | 78.26 | 1.49 | 1.29 |
| PABPC4   | 1.33  | 1.60  | 1.98  | 1.49 | 1.20 |
| NCOA4    | 0.72  | 0.85  | 1.07  | 1.49 | 1.18 |
| RAP2B    | 0.40  | 0.63  | 0.59  | 1.48 | 1.59 |
| SEC14L1  | 0.41  | 0.49  | 0.61  | 1.48 | 1.20 |
| PRDX1    | 5.44  | 6.16  | 8.03  | 1.48 | 1.13 |
| GNAS     | 1.89  | 2.58  | 2.78  | 1.47 | 1.37 |
| WIPI1    | 0.45  | 0.55  | 0.66  | 1.47 | 1.22 |
| PTMS     | 0.70  | 1.01  | 1.03  | 1.47 | 1.44 |
| CYSTM1   | 1.41  | 1.80  | 2.07  | 1.46 | 1.28 |
| MT-ND5   | 5.81  | 6.22  | 8.51  | 1.46 | 1.07 |
| SLC39A8  | 0.36  | 0.34  | 0.53  | 1.46 | 0.93 |
| KCTD12   | 1.30  | 1.69  | 1.89  | 1.46 | 1.31 |
| VIM      | 38.04 | 57.64 | 55.20 | 1.45 | 1.52 |
| PLD3     | 1.63  | 1.94  | 2.35  | 1.45 | 1.19 |
| IL18     | 0.52  | 0.69  | 0.75  | 1.44 | 1.32 |
| VOPP1    | 0.39  | 0.49  | 0.56  | 1.44 | 1.26 |
| MT-CO2   | 59.98 | 73.95 | 86.24 | 1.44 | 1.23 |
| MFSD1    | 1.68  | 1.89  | 2.41  | 1.43 | 1.13 |
| MPC2     | 1.04  | 1.32  | 1.50  | 1.43 | 1.26 |
| BRI3     | 5.70  | 8.60  | 8.16  | 1.43 | 1.51 |
| FOXN3    | 0.39  | 0.46  | 0.55  | 1.43 | 1.18 |
| RNF130   | 2.88  | 3.69  | 4.11  | 1.43 | 1.28 |
| HLA-DRB5 | 4.38  | 6.82  | 6.25  | 1.43 | 1.56 |
| ABHD2    | 0.42  | 0.56  | 0.60  | 1.43 | 1.32 |

|          |        |        |        |      |      |
|----------|--------|--------|--------|------|------|
| CTSS     | 7.28   | 7.25   | 10.35  | 1.42 | 1.00 |
| OXA1L    | 0.50   | 0.55   | 0.71   | 1.42 | 1.09 |
| CTSB     | 17.46  | 21.11  | 24.82  | 1.42 | 1.21 |
| DRAM1    | 0.40   | 0.45   | 0.57   | 1.42 | 1.13 |
| PLPP3    | 0.37   | 0.48   | 0.53   | 1.42 | 1.30 |
| KIAA0930 | 0.53   | 0.58   | 0.75   | 1.42 | 1.11 |
| MT-ND1   | 29.88  | 42.04  | 42.36  | 1.42 | 1.41 |
| HLA-DQB1 | 4.49   | 6.19   | 6.36   | 1.42 | 1.38 |
| FPR3     | 1.05   | 1.20   | 1.48   | 1.41 | 1.14 |
| TMSB4X   | 182.37 | 233.67 | 257.90 | 1.41 | 1.28 |
| CREG1    | 2.05   | 2.92   | 2.89   | 1.41 | 1.43 |
| PTEN     | 0.41   | 0.55   | 0.58   | 1.41 | 1.33 |
| NFIC     | 0.36   | 0.45   | 0.51   | 1.41 | 1.25 |
| PNKD     | 0.38   | 0.45   | 0.53   | 1.41 | 1.21 |
| RNASSET2 | 1.44   | 1.95   | 2.01   | 1.40 | 1.36 |
| ARL4C    | 0.87   | 0.74   | 1.22   | 1.40 | 0.85 |
| TGFBR2   | 0.36   | 0.37   | 0.51   | 1.40 | 1.03 |
| C9orf16  | 1.91   | 2.76   | 2.66   | 1.39 | 1.45 |
| DICER1   | 0.43   | 0.53   | 0.60   | 1.39 | 1.23 |
| WNK1     | 0.60   | 0.72   | 0.84   | 1.39 | 1.19 |
| CEBPD    | 2.22   | 2.60   | 3.07   | 1.39 | 1.17 |
| CBR1     | 0.45   | 0.60   | 0.63   | 1.38 | 1.33 |
| DPYSL2   | 0.71   | 0.84   | 0.97   | 1.37 | 1.18 |
| RGS2     | 2.70   | 3.35   | 3.71   | 1.37 | 1.24 |
| SHTN1    | 0.38   | 0.49   | 0.51   | 1.37 | 1.31 |
| APH1B    | 0.39   | 0.44   | 0.54   | 1.37 | 1.13 |
| LGALS3   | 16.36  | 26.40  | 22.39  | 1.37 | 1.61 |
| MFSD12   | 0.50   | 0.65   | 0.69   | 1.37 | 1.30 |
| LGALS1   | 28.10  | 32.07  | 38.29  | 1.36 | 1.14 |
| HCST     | 2.35   | 2.53   | 3.20   | 1.36 | 1.07 |
| PECAM1   | 0.54   | 0.84   | 0.73   | 1.36 | 1.55 |
| TFRC     | 2.43   | 3.33   | 3.30   | 1.36 | 1.37 |
| CTSH     | 1.95   | 3.09   | 2.65   | 1.36 | 1.58 |
| SCPEP1   | 0.95   | 0.94   | 1.29   | 1.36 | 0.99 |
| PLGRKT   | 0.43   | 0.55   | 0.58   | 1.35 | 1.29 |
| FOXO3    | 0.65   | 0.64   | 0.88   | 1.35 | 0.98 |
| RRAGD    | 0.51   | 0.66   | 0.69   | 1.35 | 1.29 |
| GTF3A    | 1.53   | 1.94   | 2.07   | 1.35 | 1.26 |
| GLMP     | 0.42   | 0.54   | 0.57   | 1.35 | 1.28 |
| MBD2     | 0.43   | 0.49   | 0.58   | 1.34 | 1.13 |
| ATP6AP2  | 1.69   | 1.78   | 2.28   | 1.34 | 1.05 |
| DNAJB1   | 1.13   | 0.58   | 1.51   | 1.34 | 0.51 |



|         |        |        |        |      |      |
|---------|--------|--------|--------|------|------|
| OTOA    | 0.49   | 0.57   | 0.65   | 1.34 | 1.16 |
| RNASE1  | 3.03   | 1.26   | 4.06   | 1.34 | 0.42 |
| KLF6    | 3.90   | 3.88   | 5.21   | 1.34 | 1.00 |
| BLOC1S2 | 1.14   | 1.51   | 1.53   | 1.34 | 1.32 |
| CYFIP1  | 0.62   | 0.70   | 0.82   | 1.33 | 1.14 |
| RHOB    | 1.67   | 1.99   | 2.22   | 1.33 | 1.19 |
| CELF2   | 0.99   | 1.16   | 1.32   | 1.33 | 1.17 |
| DNAJC1  | 0.40   | 0.49   | 0.53   | 1.33 | 1.22 |
| MAN1A1  | 0.48   | 0.51   | 0.64   | 1.33 | 1.06 |
| CRTAP   | 0.71   | 0.74   | 0.93   | 1.32 | 1.05 |
| CCDC85B | 0.67   | 0.82   | 0.89   | 1.32 | 1.22 |
| OGFRL1  | 0.61   | 0.65   | 0.81   | 1.32 | 1.07 |
| PAPSS2  | 0.53   | 0.51   | 0.70   | 1.32 | 0.97 |
| GSN     | 2.58   | 2.84   | 3.41   | 1.32 | 1.10 |
| FOSB    | 2.33   | 2.60   | 3.06   | 1.32 | 1.12 |
| RBPJ    | 1.44   | 1.57   | 1.88   | 1.31 | 1.09 |
| GLIPR1  | 1.08   | 1.14   | 1.41   | 1.31 | 1.05 |
| OSBPL8  | 0.80   | 0.96   | 1.04   | 1.31 | 1.21 |
| SRGN    | 15.13  | 15.61  | 19.74  | 1.30 | 1.03 |
| MDH1    | 1.05   | 1.02   | 1.37   | 1.30 | 0.98 |
| SQRDL   | 1.16   | 1.35   | 1.51   | 1.30 | 1.16 |
| DARS    | 0.46   | 0.52   | 0.60   | 1.30 | 1.11 |
| SNX9    | 0.52   | 0.53   | 0.68   | 1.30 | 1.00 |
| CSF1R   | 0.42   | 0.52   | 0.54   | 1.29 | 1.26 |
| DSTN    | 1.51   | 1.71   | 1.95   | 1.29 | 1.13 |
| KDELR1  | 0.61   | 0.76   | 0.79   | 1.29 | 1.24 |
| ISCU    | 1.85   | 2.13   | 2.38   | 1.29 | 1.15 |
| EVI2A   | 0.80   | 0.61   | 1.03   | 1.29 | 0.77 |
| IRF2BP2 | 0.66   | 0.62   | 0.85   | 1.28 | 0.93 |
| MT-ATP6 | 36.97  | 42.19  | 47.34  | 1.28 | 1.14 |
| POLR3GL | 0.50   | 0.65   | 0.63   | 1.28 | 1.31 |
| GNS     | 1.07   | 1.13   | 1.37   | 1.28 | 1.05 |
| NAGK    | 0.46   | 0.55   | 0.59   | 1.28 | 1.19 |
| BHLHE40 | 0.57   | 0.56   | 0.72   | 1.27 | 0.98 |
| IGF2R   | 0.40   | 0.46   | 0.51   | 1.27 | 1.15 |
| SNAP29  | 0.39   | 0.47   | 0.50   | 1.27 | 1.19 |
| FTH1    | 335.82 | 436.38 | 427.14 | 1.27 | 1.30 |
| SLC31A1 | 0.44   | 0.53   | 0.55   | 1.27 | 1.22 |
| RAC2    | 0.55   | 0.70   | 0.69   | 1.27 | 1.27 |
| DDX17   | 0.92   | 0.87   | 1.17   | 1.27 | 0.94 |
| FGL2    | 0.57   | 0.49   | 0.72   | 1.27 | 0.85 |
| LTA4H   | 1.99   | 2.11   | 2.52   | 1.27 | 1.06 |

|         |       |       |       |       |      |      |
|---------|-------|-------|-------|-------|------|------|
| PRDX4   |       | 0.67  | 0.76  | 0.84  | 1.27 | 1.14 |
|         | 9-Sep | 0.55  | 0.60  | 0.70  | 1.27 | 1.09 |
| FAM96A  |       | 1.28  | 1.35  | 1.62  | 1.26 | 1.05 |
| ETHE1   |       | 0.60  | 0.73  | 0.75  | 1.26 | 1.22 |
| GUSB    |       | 0.59  | 0.74  | 0.74  | 1.26 | 1.27 |
| CHMP4B  |       | 0.62  | 0.77  | 0.78  | 1.26 | 1.24 |
| C4orf3  |       | 2.53  | 2.62  | 3.18  | 1.26 | 1.04 |
|         | 2-Mar | 0.47  | 0.67  | 0.59  | 1.25 | 1.41 |
| RAB32   |       | 0.73  | 0.83  | 0.92  | 1.25 | 1.13 |
| TNFAIP2 |       | 0.47  | 0.50  | 0.58  | 1.25 | 1.08 |
| ERO1A   |       | 0.43  | 0.42  | 0.53  | 1.25 | 0.98 |
| LY96    |       | 1.99  | 1.96  | 2.49  | 1.25 | 0.98 |
| ITGAM   |       | 0.58  | 0.85  | 0.73  | 1.25 | 1.45 |
| FKBP5   |       | 1.44  | 1.78  | 1.80  | 1.24 | 1.23 |
| CAPG    |       | 5.76  | 6.34  | 7.17  | 1.24 | 1.10 |
| RPA3    |       | 0.50  | 0.51  | 0.62  | 1.24 | 1.02 |
| NDFIP1  |       | 1.12  | 1.11  | 1.40  | 1.24 | 0.99 |
| PBDC1   |       | 0.53  | 0.52  | 0.66  | 1.24 | 0.98 |
| MT-ND3  |       | 20.31 | 20.17 | 25.23 | 1.24 | 0.99 |
| NGFRAP1 |       | 0.56  | 0.53  | 0.69  | 1.24 | 0.95 |
| GLA     |       | 0.55  | 0.61  | 0.68  | 1.24 | 1.10 |
| SDSL    |       | 0.57  | 0.86  | 0.71  | 1.24 | 1.51 |
| ADAM9   |       | 0.72  | 0.76  | 0.90  | 1.24 | 1.05 |
| RAB31   |       | 2.30  | 2.31  | 2.86  | 1.24 | 1.00 |
| CALU    |       | 0.81  | 0.83  | 1.00  | 1.24 | 1.03 |
| WASF2   |       | 1.03  | 1.38  | 1.28  | 1.24 | 1.33 |
| RNF145  |       | 0.57  | 0.48  | 0.70  | 1.24 | 0.85 |
| SLA     |       | 1.10  | 1.37  | 1.37  | 1.24 | 1.24 |
| FOS     |       | 6.26  | 6.70  | 7.75  | 1.24 | 1.07 |
| TPP1    |       | 1.78  | 1.97  | 2.20  | 1.24 | 1.11 |
| LITAF   |       | 3.15  | 3.88  | 3.88  | 1.23 | 1.23 |
| MGST2   |       | 0.60  | 0.66  | 0.74  | 1.23 | 1.09 |
| RNASE6  |       | 0.87  | 0.80  | 1.08  | 1.23 | 0.91 |
| PRNP    |       | 0.89  | 0.90  | 1.10  | 1.23 | 1.01 |
| LAMP1   |       | 2.98  | 3.81  | 3.67  | 1.23 | 1.28 |
| EEF1A1  |       | 50.34 | 55.53 | 61.94 | 1.23 | 1.10 |
| HEBP1   |       | 0.51  | 0.70  | 0.63  | 1.23 | 1.37 |
| VTI1B   |       | 0.81  | 1.16  | 0.99  | 1.23 | 1.44 |
| STX7    |       | 0.83  | 0.97  | 1.01  | 1.23 | 1.17 |
| S100A9  |       | 9.27  | 10.38 | 11.36 | 1.23 | 1.12 |
| YBX3    |       | 1.60  | 2.01  | 1.96  | 1.22 | 1.26 |
| CALM2   |       | 6.60  | 6.21  | 8.06  | 1.22 | 0.94 |

|          |       |       |       |      |      |
|----------|-------|-------|-------|------|------|
| CMTM3    | 0.50  | 0.46  | 0.61  | 1.22 | 0.92 |
| MBP      | 0.44  | 0.41  | 0.54  | 1.22 | 0.91 |
| FEZ2     | 0.50  | 0.51  | 0.61  | 1.22 | 1.02 |
| MT-ND2   | 42.84 | 52.46 | 52.04 | 1.21 | 1.22 |
| TMEM70   | 0.97  | 1.02  | 1.18  | 1.21 | 1.06 |
| ZFP36L1  | 1.52  | 1.35  | 1.84  | 1.21 | 0.88 |
| EGR1     | 0.72  | 0.54  | 0.87  | 1.21 | 0.75 |
| ARRB2    | 1.44  | 1.60  | 1.74  | 1.21 | 1.11 |
| USF2     | 0.80  | 1.45  | 0.96  | 1.21 | 1.81 |
| CSNK2B   | 1.27  | 1.42  | 1.53  | 1.20 | 1.11 |
| ADAP2    | 0.45  | 0.53  | 0.54  | 1.20 | 1.17 |
| ATP6V1A  | 0.76  | 0.82  | 0.92  | 1.20 | 1.07 |
| CYB5A    | 1.27  | 1.70  | 1.52  | 1.20 | 1.33 |
| EIF4B    | 0.93  | 1.03  | 1.11  | 1.20 | 1.11 |
| NPL      | 0.98  | 1.19  | 1.18  | 1.20 | 1.21 |
| ITGB1    | 1.28  | 1.30  | 1.53  | 1.20 | 1.02 |
| TXNIP    | 2.98  | 2.14  | 3.56  | 1.20 | 0.72 |
| HEXB     | 3.34  | 3.43  | 3.99  | 1.19 | 1.03 |
| HNRNPUL1 | 0.50  | 0.57  | 0.60  | 1.19 | 1.14 |
| LAMP2    | 1.49  | 1.28  | 1.78  | 1.19 | 0.86 |
| WIPI2    | 0.43  | 0.44  | 0.51  | 1.19 | 1.02 |
| RNASEH2B | 0.54  | 0.66  | 0.64  | 1.19 | 1.23 |
| FAM195B  | 0.84  | 1.01  | 1.00  | 1.19 | 1.21 |
| AKR1B1   | 1.06  | 1.19  | 1.27  | 1.19 | 1.12 |
| JAK1     | 0.84  | 0.88  | 1.00  | 1.19 | 1.05 |
| GOLIM4   | 0.46  | 0.56  | 0.55  | 1.19 | 1.22 |
| NECAP2   | 0.52  | 0.53  | 0.62  | 1.19 | 1.02 |
| SCARB2   | 1.03  | 1.14  | 1.23  | 1.19 | 1.11 |
| FCGR2B   | 0.73  | 0.65  | 0.87  | 1.19 | 0.89 |
| HLA-A    | 10.45 | 13.35 | 12.39 | 1.19 | 1.28 |
| RNF144B  | 0.60  | 0.57  | 0.71  | 1.19 | 0.95 |
| SNHG7    | 0.43  | 0.52  | 0.51  | 1.18 | 1.23 |
| CTBS     | 0.47  | 0.45  | 0.55  | 1.18 | 0.95 |
| MPP1     | 1.16  | 1.40  | 1.37  | 1.18 | 1.20 |
| IPO7     | 0.47  | 0.50  | 0.55  | 1.18 | 1.08 |
| SLC16A10 | 1.53  | 1.98  | 1.81  | 1.18 | 1.29 |
| SH3GLB1  | 1.51  | 1.61  | 1.78  | 1.18 | 1.07 |
| BCAP31   | 2.32  | 2.74  | 2.74  | 1.18 | 1.18 |
| CAPZB    | 1.93  | 2.27  | 2.28  | 1.18 | 1.17 |
| SH3BGRL  | 3.01  | 3.06  | 3.54  | 1.18 | 1.02 |
| CYP27A1  | 2.17  | 2.62  | 2.56  | 1.18 | 1.21 |
| APMAP    | 0.43  | 0.37  | 0.50  | 1.18 | 0.85 |

|           |       |       |       |      |      |
|-----------|-------|-------|-------|------|------|
| PPT1      | 2.38  | 2.89  | 2.80  | 1.18 | 1.21 |
| MRFAP1    | 1.03  | 1.01  | 1.21  | 1.17 | 0.98 |
| GALNT1    | 0.50  | 0.56  | 0.58  | 1.17 | 1.13 |
| RBMS1     | 0.86  | 1.00  | 1.01  | 1.17 | 1.16 |
| DHRS4L2   | 0.43  | 0.46  | 0.51  | 1.17 | 1.06 |
| CNIH4     | 1.21  | 1.33  | 1.42  | 1.17 | 1.09 |
| PITHD1    | 0.43  | 0.50  | 0.51  | 1.17 | 1.14 |
| EID1      | 1.03  | 0.98  | 1.20  | 1.17 | 0.95 |
| TAGLN2    | 4.22  | 4.65  | 4.92  | 1.17 | 1.10 |
| RHOQ      | 0.73  | 0.73  | 0.85  | 1.17 | 1.01 |
| NSMCE1    | 0.44  | 0.47  | 0.51  | 1.17 | 1.07 |
| RAB20     | 1.24  | 1.34  | 1.45  | 1.17 | 1.08 |
| MSN       | 1.35  | 1.43  | 1.57  | 1.17 | 1.06 |
| ATP6V1C1  | 0.74  | 0.79  | 0.86  | 1.16 | 1.07 |
| DMXL2     | 0.45  | 0.43  | 0.53  | 1.16 | 0.95 |
| ZMAT2     | 0.60  | 0.57  | 0.69  | 1.16 | 0.96 |
| GNA13     | 1.07  | 0.93  | 1.24  | 1.16 | 0.87 |
| PTTG1IP   | 0.63  | 0.75  | 0.73  | 1.16 | 1.20 |
| TAF7      | 0.48  | 0.41  | 0.55  | 1.16 | 0.86 |
| HLA-DMA   | 4.28  | 4.73  | 4.95  | 1.16 | 1.11 |
| TM9SF2    | 0.49  | 0.47  | 0.56  | 1.16 | 0.97 |
| GTF2I     | 0.47  | 0.44  | 0.54  | 1.16 | 0.94 |
| ANXA2     | 11.23 | 12.86 | 12.98 | 1.16 | 1.15 |
| ATP6V1H   | 0.54  | 0.50  | 0.62  | 1.15 | 0.92 |
| COTL1     | 5.08  | 6.17  | 5.86  | 1.15 | 1.22 |
| CAMLG     | 0.64  | 0.64  | 0.73  | 1.15 | 1.01 |
| HERPUD1   | 2.99  | 2.84  | 3.45  | 1.15 | 0.95 |
| IGFBP7    | 0.44  | 0.48  | 0.51  | 1.15 | 1.08 |
| ATP6V0E1  | 5.68  | 6.54  | 6.54  | 1.15 | 1.15 |
| ATOX1     | 2.74  | 2.91  | 3.16  | 1.15 | 1.06 |
| PFKFB3    | 0.45  | 0.37  | 0.51  | 1.15 | 0.84 |
| GABARAPL2 | 1.52  | 1.52  | 1.74  | 1.15 | 1.00 |
| IL10RB    | 0.65  | 0.87  | 0.75  | 1.15 | 1.33 |
| CAB39     | 0.56  | 0.45  | 0.65  | 1.14 | 0.79 |
| DCXR      | 0.90  | 0.86  | 1.03  | 1.14 | 0.95 |
| SDHC      | 1.02  | 0.98  | 1.16  | 1.14 | 0.96 |
| FXYS5     | 2.55  | 3.34  | 2.91  | 1.14 | 1.31 |
| AES       | 0.49  | 0.58  | 0.56  | 1.14 | 1.19 |
| IMP3      | 0.51  | 0.52  | 0.59  | 1.14 | 1.01 |
| ITM2B     | 6.89  | 6.06  | 7.84  | 1.14 | 0.88 |
| ATRAID    | 1.16  | 1.45  | 1.32  | 1.14 | 1.25 |
| DBI       | 7.23  | 8.06  | 8.22  | 1.14 | 1.12 |

|          |       |       |       |      |      |
|----------|-------|-------|-------|------|------|
| EFR3A    | 0.46  | 0.47  | 0.52  | 1.14 | 1.03 |
| ACAP2    | 0.49  | 0.54  | 0.56  | 1.13 | 1.09 |
| TOMM20   | 1.46  | 1.36  | 1.65  | 1.13 | 0.93 |
| TYROBP   | 26.19 | 30.72 | 29.66 | 1.13 | 1.17 |
| PCBD1    | 0.80  | 0.97  | 0.91  | 1.13 | 1.21 |
| RBX1     | 2.53  | 2.39  | 2.86  | 1.13 | 0.95 |
| ICAM1    | 0.53  | 0.56  | 0.60  | 1.13 | 1.05 |
| REEP5    | 2.10  | 2.15  | 2.37  | 1.13 | 1.02 |
| CYBB     | 2.29  | 2.89  | 2.59  | 1.13 | 1.26 |
| RPS4X    | 20.08 | 21.87 | 22.67 | 1.13 | 1.09 |
| NDUFS4   | 0.87  | 0.86  | 0.98  | 1.13 | 0.99 |
| S100A10  | 24.38 | 27.69 | 27.46 | 1.13 | 1.14 |
| HM13     | 0.77  | 0.99  | 0.86  | 1.13 | 1.29 |
| GPX1     | 24.08 | 25.63 | 27.07 | 1.12 | 1.06 |
| APPL1    | 0.47  | 0.55  | 0.52  | 1.12 | 1.18 |
| YY1      | 0.67  | 0.65  | 0.76  | 1.12 | 0.96 |
| SUCLG1   | 0.50  | 0.51  | 0.57  | 1.12 | 1.01 |
| PDK4     | 1.31  | 1.85  | 1.47  | 1.12 | 1.42 |
| CHPT1    | 0.49  | 0.63  | 0.55  | 1.12 | 1.29 |
| MPC1     | 0.90  | 1.02  | 1.01  | 1.12 | 1.14 |
| DGCR6L   | 0.46  | 0.61  | 0.51  | 1.12 | 1.33 |
| HSD3B7   | 0.51  | 0.69  | 0.57  | 1.12 | 1.36 |
| GLUD1    | 0.55  | 0.60  | 0.62  | 1.12 | 1.09 |
| ADIPOR1  | 0.96  | 1.10  | 1.07  | 1.12 | 1.15 |
| ZYX      | 0.74  | 0.80  | 0.83  | 1.12 | 1.08 |
| SERINC1  | 0.83  | 0.74  | 0.92  | 1.12 | 0.90 |
| LIMS1    | 3.29  | 3.59  | 3.68  | 1.12 | 1.09 |
| HSD17B11 | 0.79  | 0.81  | 0.89  | 1.12 | 1.02 |
| MRPS6    | 0.59  | 0.52  | 0.66  | 1.12 | 0.88 |
| NACA     | 10.06 | 10.11 | 11.20 | 1.11 | 1.01 |
| IDH2     | 0.54  | 0.89  | 0.60  | 1.11 | 1.64 |
| PAPSS1   | 0.60  | 0.57  | 0.66  | 1.11 | 0.96 |
| HPGD     | 0.62  | 0.49  | 0.69  | 1.11 | 0.79 |
| DRAM2    | 1.02  | 1.14  | 1.13  | 1.11 | 1.12 |
| CFDP1    | 0.59  | 0.60  | 0.66  | 1.11 | 1.01 |
| DCAF7    | 0.51  | 0.52  | 0.57  | 1.11 | 1.02 |
| WIPF1    | 0.84  | 0.76  | 0.94  | 1.11 | 0.90 |
| PRKAR1A  | 0.86  | 0.81  | 0.96  | 1.11 | 0.94 |
| APH1A    | 0.91  | 1.17  | 1.01  | 1.11 | 1.28 |
| SOD1     | 1.89  | 1.95  | 2.10  | 1.11 | 1.03 |
| RGCC     | 10.93 | 10.23 | 12.10 | 1.11 | 0.94 |
| 2-Sep    | 0.93  | 0.96  | 1.03  | 1.11 | 1.03 |

|          |       |       |       |      |      |
|----------|-------|-------|-------|------|------|
| FGR      | 1.67  | 1.79  | 1.84  | 1.11 | 1.08 |
| CRIP1    | 1.07  | 1.36  | 1.19  | 1.11 | 1.27 |
| IGBP1    | 0.53  | 0.55  | 0.59  | 1.11 | 1.04 |
| SIRPA    | 0.78  | 0.87  | 0.87  | 1.10 | 1.11 |
| SMS      | 1.67  | 1.72  | 1.84  | 1.10 | 1.03 |
| AHR      | 0.59  | 0.51  | 0.65  | 1.10 | 0.87 |
| SSR3     | 2.22  | 2.46  | 2.45  | 1.10 | 1.11 |
| ATPIF1   | 1.34  | 1.21  | 1.48  | 1.10 | 0.90 |
| TFPT     | 0.58  | 0.86  | 0.64  | 1.10 | 1.48 |
| H2AFV    | 1.29  | 1.47  | 1.42  | 1.10 | 1.14 |
| CD63     | 23.85 | 25.83 | 26.30 | 1.10 | 1.08 |
| MT-ND4L  | 1.84  | 1.49  | 2.03  | 1.10 | 0.81 |
| PILRA    | 0.52  | 0.61  | 0.57  | 1.10 | 1.19 |
| PPP1R10  | 0.47  | 0.53  | 0.52  | 1.10 | 1.13 |
| RHOA     | 7.44  | 7.68  | 8.18  | 1.10 | 1.03 |
| SERPINB6 | 0.76  | 0.92  | 0.83  | 1.10 | 1.21 |
| HCFC1R1  | 0.57  | 0.65  | 0.63  | 1.10 | 1.13 |
| SCCPDH   | 0.79  | 1.33  | 0.87  | 1.09 | 1.68 |
| EMP1     | 1.97  | 1.43  | 2.16  | 1.09 | 0.72 |
| COPRS    | 0.57  | 0.69  | 0.62  | 1.09 | 1.21 |
| PEBP1    | 2.05  | 2.51  | 2.25  | 1.09 | 1.22 |
| CTDNEP1  | 0.68  | 0.62  | 0.74  | 1.09 | 0.91 |
| MAX      | 0.46  | 0.46  | 0.50  | 1.09 | 1.01 |
| S100A13  | 0.50  | 0.74  | 0.55  | 1.09 | 1.47 |
| BOLA3    | 0.57  | 0.67  | 0.62  | 1.09 | 1.17 |
| TAOK3    | 0.74  | 0.68  | 0.81  | 1.09 | 0.92 |
| TMEM14C  | 1.30  | 1.40  | 1.42  | 1.09 | 1.07 |
| PRMT2    | 0.55  | 0.63  | 0.59  | 1.09 | 1.15 |
| CD47     | 1.58  | 1.85  | 1.72  | 1.09 | 1.17 |
| SURF1    | 0.62  | 0.77  | 0.68  | 1.09 | 1.24 |
| ANXA7    | 0.83  | 0.72  | 0.91  | 1.09 | 0.86 |
| HINT1    | 4.34  | 4.75  | 4.72  | 1.09 | 1.09 |
| IFI27L2  | 1.44  | 1.45  | 1.56  | 1.09 | 1.01 |
| FAAP20   | 0.63  | 0.67  | 0.69  | 1.09 | 1.06 |
| TNFRSF14 | 0.54  | 0.57  | 0.59  | 1.09 | 1.05 |
| ESD      | 0.97  | 0.93  | 1.06  | 1.08 | 0.95 |
| GNAI2    | 1.84  | 1.95  | 1.99  | 1.08 | 1.06 |
| TXN      | 8.91  | 10.27 | 9.64  | 1.08 | 1.15 |
| CFLAR    | 1.11  | 1.13  | 1.20  | 1.08 | 1.02 |
| ARL2     | 0.64  | 0.76  | 0.69  | 1.08 | 1.19 |
| PTMA     | 21.14 | 19.46 | 22.86 | 1.08 | 0.92 |
| AMD1     | 0.77  | 0.87  | 0.83  | 1.08 | 1.14 |

|           |       |       |       |      |      |
|-----------|-------|-------|-------|------|------|
| ACTB      | 48.71 | 54.55 | 52.65 | 1.08 | 1.12 |
| RAB7A     | 2.54  | 2.33  | 2.75  | 1.08 | 0.91 |
| FAM195A   | 0.91  | 1.03  | 0.98  | 1.08 | 1.13 |
| SDHB      | 1.24  | 1.28  | 1.34  | 1.08 | 1.03 |
| ATF3      | 1.24  | 0.97  | 1.33  | 1.08 | 0.78 |
| LILRB3    | 0.48  | 0.65  | 0.52  | 1.08 | 1.34 |
| JUND      | 1.70  | 1.19  | 1.83  | 1.08 | 0.70 |
| ATP6AP1   | 1.64  | 1.50  | 1.76  | 1.08 | 0.92 |
| ITGB1BP1  | 1.01  | 0.93  | 1.09  | 1.07 | 0.92 |
| NUCKS1    | 1.03  | 1.12  | 1.11  | 1.07 | 1.08 |
| CFL1      | 12.98 | 12.77 | 13.94 | 1.07 | 0.98 |
| VAMP8     | 5.82  | 6.09  | 6.26  | 1.07 | 1.05 |
| CLTA      | 3.05  | 3.03  | 3.28  | 1.07 | 0.99 |
| ZCRB1     | 0.86  | 1.03  | 0.93  | 1.07 | 1.20 |
| CAP1      | 3.10  | 3.12  | 3.32  | 1.07 | 1.01 |
| CD58      | 0.75  | 0.61  | 0.80  | 1.07 | 0.81 |
| TDP2      | 0.70  | 0.71  | 0.75  | 1.07 | 1.02 |
| DDAH2     | 1.07  | 1.22  | 1.14  | 1.07 | 1.14 |
| C7orf73   | 1.49  | 1.52  | 1.60  | 1.07 | 1.02 |
| ARL6IP5   | 1.74  | 1.55  | 1.86  | 1.07 | 0.89 |
| LAPTM4A   | 2.13  | 1.58  | 2.28  | 1.07 | 0.74 |
| CAST      | 1.60  | 1.69  | 1.71  | 1.07 | 1.06 |
| ASAH1     | 6.02  | 5.94  | 6.44  | 1.07 | 0.99 |
| RPL7      | 21.85 | 20.50 | 23.38 | 1.07 | 0.94 |
| CMTM7     | 0.65  | 0.92  | 0.69  | 1.07 | 1.42 |
| RPL10     | 51.79 | 51.04 | 55.35 | 1.07 | 0.99 |
| LASP1     | 0.62  | 0.61  | 0.66  | 1.07 | 0.99 |
| CACUL1    | 0.49  | 0.46  | 0.52  | 1.07 | 0.94 |
| CD74      | 36.86 | 41.19 | 39.28 | 1.07 | 1.12 |
| LINC01272 | 2.21  | 3.37  | 2.36  | 1.07 | 1.52 |
| NUDT21    | 0.47  | 0.49  | 0.50  | 1.07 | 1.03 |
| NSA2      | 0.98  | 0.99  | 1.05  | 1.07 | 1.01 |
| TAX1BP3   | 0.53  | 0.64  | 0.56  | 1.06 | 1.21 |
| UQCRB     | 7.68  | 6.75  | 8.18  | 1.06 | 0.88 |
| SLC2A3    | 1.87  | 1.10  | 1.99  | 1.06 | 0.59 |
| CD81      | 2.76  | 2.61  | 2.94  | 1.06 | 0.95 |
| GDI2      | 1.41  | 1.64  | 1.50  | 1.06 | 1.16 |
| FERMT3    | 0.81  | 0.99  | 0.87  | 1.06 | 1.22 |
| PPIA      | 7.79  | 7.02  | 8.28  | 1.06 | 0.90 |
| OAZ1      | 23.01 | 24.95 | 24.44 | 1.06 | 1.08 |
| SRSF4     | 0.48  | 0.48  | 0.51  | 1.06 | 1.00 |
| VAMP2     | 0.57  | 0.48  | 0.61  | 1.06 | 0.84 |

|           |        |        |        |      |      |
|-----------|--------|--------|--------|------|------|
| B2M       | 112.78 | 107.35 | 119.71 | 1.06 | 0.95 |
| DUSP23    | 1.12   | 1.39   | 1.19   | 1.06 | 1.24 |
| LINC00657 | 0.64   | 0.60   | 0.67   | 1.06 | 0.95 |
| COMMD7    | 0.56   | 0.72   | 0.60   | 1.06 | 1.28 |
| ATP5A1    | 1.42   | 1.45   | 1.51   | 1.06 | 1.02 |
| TMEM179B  | 0.75   | 0.88   | 0.79   | 1.06 | 1.17 |
| FBXO7     | 0.51   | 0.54   | 0.54   | 1.06 | 1.06 |
| RPS24     | 27.49  | 25.29  | 29.01  | 1.06 | 0.92 |
| ODF3B     | 0.50   | 0.55   | 0.53   | 1.05 | 1.10 |
| SOAT1     | 1.24   | 1.32   | 1.30   | 1.05 | 1.07 |
| TPT1      | 49.95  | 48.70  | 52.65  | 1.05 | 0.97 |
| RAB10     | 1.29   | 1.29   | 1.36   | 1.05 | 1.00 |
| VAPA      | 2.86   | 2.59   | 3.01   | 1.05 | 0.90 |
| MS4A7     | 6.25   | 5.54   | 6.57   | 1.05 | 0.89 |
| TTC3      | 0.56   | 0.72   | 0.59   | 1.05 | 1.29 |
| DGUOK     | 0.68   | 0.71   | 0.71   | 1.05 | 1.05 |
| EIF3H     | 2.06   | 2.03   | 2.16   | 1.05 | 0.98 |
| HMG1      | 2.17   | 3.11   | 2.28   | 1.05 | 1.43 |
| LSM8      | 0.92   | 0.77   | 0.97   | 1.05 | 0.84 |
| RBM47     | 1.11   | 1.00   | 1.16   | 1.05 | 0.90 |
| LSP1      | 0.95   | 1.32   | 1.00   | 1.04 | 1.38 |
| FKBP8     | 0.99   | 1.15   | 1.03   | 1.04 | 1.17 |
| CD44      | 4.92   | 4.43   | 5.13   | 1.04 | 0.90 |
| CNIH1     | 0.80   | 0.86   | 0.83   | 1.04 | 1.08 |
| TMBIM4    | 1.50   | 1.42   | 1.56   | 1.04 | 0.94 |
| ERGIC3    | 0.86   | 1.07   | 0.90   | 1.04 | 1.24 |
| TLR2      | 0.66   | 0.60   | 0.68   | 1.04 | 0.91 |
| MIS18BP1  | 0.52   | 0.69   | 0.54   | 1.04 | 1.32 |
| ABI1      | 0.65   | 0.53   | 0.67   | 1.04 | 0.82 |
| BRK1      | 2.93   | 3.19   | 3.05   | 1.04 | 1.09 |
| GNB1      | 1.14   | 1.03   | 1.19   | 1.04 | 0.90 |
| CD83      | 1.63   | 1.49   | 1.69   | 1.04 | 0.91 |
| CSDE1     | 1.83   | 1.90   | 1.90   | 1.04 | 1.04 |
| DEK       | 1.45   | 1.37   | 1.50   | 1.04 | 0.95 |
| TMEM59    | 2.72   | 2.24   | 2.83   | 1.04 | 0.82 |
| CAPNS1    | 0.77   | 0.80   | 0.80   | 1.04 | 1.03 |
| ROCK1     | 1.10   | 1.06   | 1.15   | 1.04 | 0.96 |
| APLP2     | 4.00   | 3.64   | 4.15   | 1.04 | 0.91 |
| YBX1      | 20.27  | 23.76  | 21.01  | 1.04 | 1.17 |
| TMEM50A   | 2.01   | 1.81   | 2.09   | 1.04 | 0.90 |
| NENF      | 1.52   | 1.85   | 1.57   | 1.04 | 1.22 |
| AHCYL1    | 0.53   | 0.55   | 0.55   | 1.04 | 1.04 |



|           |       |       |       |      |      |
|-----------|-------|-------|-------|------|------|
| CTNNA1    | 0.79  | 0.70  | 0.82  | 1.04 | 0.88 |
| AP3S1     | 1.39  | 1.43  | 1.44  | 1.03 | 1.03 |
| SAMHD1    | 1.69  | 1.93  | 1.75  | 1.03 | 1.14 |
| SOD2      | 8.04  | 5.80  | 8.30  | 1.03 | 0.72 |
| SH3BP5    | 0.95  | 0.78  | 0.98  | 1.03 | 0.82 |
| WAC       | 0.56  | 0.45  | 0.58  | 1.03 | 0.80 |
| MAPK1     | 0.62  | 0.55  | 0.64  | 1.03 | 0.89 |
| REL       | 1.91  | 2.03  | 1.97  | 1.03 | 1.06 |
| MEAF6     | 0.56  | 0.55  | 0.58  | 1.03 | 0.97 |
| COPZ1     | 0.78  | 0.72  | 0.81  | 1.03 | 0.92 |
| EMC7      | 1.07  | 0.95  | 1.10  | 1.03 | 0.89 |
| MCTS1     | 0.65  | 0.65  | 0.67  | 1.03 | 1.00 |
| RPL9      | 23.57 | 21.88 | 24.24 | 1.03 | 0.93 |
| JUN       | 2.23  | 1.64  | 2.29  | 1.03 | 0.74 |
| FAM162A   | 0.67  | 0.68  | 0.68  | 1.03 | 1.02 |
| THOC7     | 0.81  | 0.77  | 0.83  | 1.03 | 0.95 |
| CD68      | 9.25  | 14.30 | 9.50  | 1.03 | 1.55 |
| LINC00998 | 1.24  | 1.52  | 1.27  | 1.02 | 1.23 |
| WSB1      | 1.20  | 1.05  | 1.23  | 1.02 | 0.88 |
| USP8      | 0.51  | 0.48  | 0.52  | 1.02 | 0.95 |
| ATP5F1    | 1.90  | 1.72  | 1.94  | 1.02 | 0.91 |
| CYTIP     | 0.99  | 0.88  | 1.01  | 1.02 | 0.89 |
| ITGAX     | 0.96  | 1.19  | 0.99  | 1.02 | 1.23 |
| EIF4A2    | 1.51  | 1.37  | 1.55  | 1.02 | 0.91 |
| TMEM219   | 1.88  | 2.41  | 1.92  | 1.02 | 1.29 |
| KTN1      | 1.31  | 1.29  | 1.33  | 1.02 | 0.99 |
| RNMT      | 0.62  | 0.55  | 0.63  | 1.02 | 0.89 |
| TCEA1     | 0.72  | 0.76  | 0.73  | 1.02 | 1.05 |
| DAD1      | 2.13  | 1.96  | 2.18  | 1.02 | 0.92 |
| RPL12     | 32.14 | 30.48 | 32.80 | 1.02 | 0.95 |
| LMO4      | 0.56  | 0.45  | 0.57  | 1.02 | 0.80 |
| RPS3A     | 26.77 | 24.94 | 27.31 | 1.02 | 0.93 |
| ARL6IP4   | 2.41  | 2.77  | 2.46  | 1.02 | 1.15 |
| SCGB1A1   | 1.38  | 0.53  | 1.40  | 1.02 | 0.39 |
| TMEM248   | 0.60  | 0.58  | 0.62  | 1.02 | 0.96 |
| KYNU      | 0.80  | 0.68  | 0.82  | 1.02 | 0.85 |
| SEC11A    | 2.58  | 2.73  | 2.63  | 1.02 | 1.06 |
| RAC1      | 8.45  | 7.99  | 8.59  | 1.02 | 0.95 |
| UQCRC2    | 0.93  | 1.00  | 0.95  | 1.02 | 1.07 |
| SCP2      | 1.50  | 1.39  | 1.53  | 1.02 | 0.92 |
| EIF3L     | 1.26  | 1.32  | 1.28  | 1.02 | 1.04 |
| RPL22     | 11.19 | 9.67  | 11.36 | 1.02 | 0.86 |

|          |       |       |       |      |      |
|----------|-------|-------|-------|------|------|
| COX6C    | 4.70  | 3.76  | 4.77  | 1.02 | 0.80 |
| NEU1     | 0.52  | 0.54  | 0.53  | 1.01 | 1.04 |
| CLEC2B   | 1.24  | 0.99  | 1.25  | 1.01 | 0.80 |
| NEAT1    | 22.62 | 25.57 | 22.89 | 1.01 | 1.13 |
| EIF3E    | 2.65  | 2.43  | 2.68  | 1.01 | 0.91 |
| MTDH     | 2.93  | 3.01  | 2.97  | 1.01 | 1.02 |
| UBE2B    | 1.79  | 1.50  | 1.81  | 1.01 | 0.84 |
| TMSB10   | 49.33 | 51.45 | 49.79 | 1.01 | 1.04 |
| SPAG7    | 0.61  | 0.65  | 0.62  | 1.01 | 1.07 |
| SMIM19   | 0.56  | 0.71  | 0.57  | 1.01 | 1.27 |
| FAM120A  | 0.91  | 0.82  | 0.91  | 1.01 | 0.91 |
| LYN      | 1.04  | 0.94  | 1.04  | 1.01 | 0.91 |
| PDCD6    | 1.04  | 1.09  | 1.05  | 1.01 | 1.05 |
| EEF1B2   | 6.98  | 7.08  | 7.03  | 1.01 | 1.01 |
| TALDO1   | 2.31  | 2.71  | 2.33  | 1.01 | 1.17 |
| RPL26    | 24.88 | 19.59 | 25.05 | 1.01 | 0.79 |
| ATP6V1B2 | 1.81  | 1.69  | 1.82  | 1.01 | 0.93 |
| WDR1     | 1.27  | 1.30  | 1.27  | 1.00 | 1.03 |
| SRP14    | 6.58  | 6.44  | 6.61  | 1.00 | 0.98 |
| CST3     | 16.34 | 18.45 | 16.40 | 1.00 | 1.13 |
| HIF1A    | 1.55  | 1.18  | 1.55  | 1.00 | 0.76 |
| APP      | 0.64  | 0.59  | 0.64  | 1.00 | 0.92 |
| AZIN1    | 0.66  | 0.60  | 0.66  | 1.00 | 0.92 |
| LCP2     | 0.67  | 0.62  | 0.67  | 1.00 | 0.93 |
| SPPL2A   | 0.81  | 0.78  | 0.81  | 1.00 | 0.96 |
| CPEB4    | 0.52  | 0.44  | 0.52  | 1.00 | 0.84 |
| GNG5     | 5.87  | 6.16  | 5.88  | 1.00 | 1.05 |
| UBXN4    | 1.13  | 1.04  | 1.13  | 1.00 | 0.93 |
| MRPL54   | 1.07  | 1.12  | 1.07  | 1.00 | 1.05 |
| ATP6V1E1 | 1.02  | 0.85  | 1.02  | 1.00 | 0.83 |
| RPL7A    | 13.28 | 13.73 | 13.26 | 1.00 | 1.03 |
| ARHGAP18 | 1.65  | 1.82  | 1.65  | 1.00 | 1.10 |
| TYMP     | 7.21  | 7.73  | 7.20  | 1.00 | 1.07 |
| EMILIN2  | 0.64  | 0.57  | 0.64  | 1.00 | 0.89 |
| TSC22D3  | 3.37  | 2.85  | 3.36  | 1.00 | 0.85 |
| CLN8     | 0.81  | 0.90  | 0.81  | 1.00 | 1.11 |
| LAMTOR5  | 3.30  | 3.21  | 3.29  | 1.00 | 0.97 |
| SH3BGR13 | 22.06 | 24.65 | 22.00 | 1.00 | 1.12 |
| DNPH1    | 0.79  | 0.91  | 0.79  | 1.00 | 1.15 |
| METTL5   | 0.60  | 0.62  | 0.59  | 1.00 | 1.05 |
| GNAQ     | 1.09  | 1.03  | 1.09  | 1.00 | 0.94 |
| MLX      | 0.54  | 0.55  | 0.54  | 1.00 | 1.02 |

|         |       |       |       |       |      |      |
|---------|-------|-------|-------|-------|------|------|
| STUB1   |       | 0.82  | 0.94  | 0.82  | 1.00 | 1.15 |
| FAM49B  |       | 2.12  | 2.08  | 2.11  | 1.00 | 0.98 |
| MGAT1   |       | 2.22  | 2.08  | 2.20  | 0.99 | 0.94 |
| MRPS7   |       | 0.57  | 0.67  | 0.57  | 0.99 | 1.17 |
| ANP32B  |       | 1.80  | 1.61  | 1.79  | 0.99 | 0.90 |
| TXNL4A  |       | 0.77  | 1.05  | 0.76  | 0.99 | 1.36 |
| SERINC3 |       | 0.51  | 0.49  | 0.51  | 0.99 | 0.97 |
| PTBP3   |       | 0.64  | 0.59  | 0.64  | 0.99 | 0.92 |
| C1QB    |       | 17.80 | 17.96 | 17.67 | 0.99 | 1.01 |
| RAB11A  |       | 1.06  | 0.93  | 1.05  | 0.99 | 0.88 |
| TMBIM6  |       | 4.79  | 3.90  | 4.76  | 0.99 | 0.81 |
| SPINT2  |       | 0.79  | 0.80  | 0.79  | 0.99 | 1.01 |
| MTIF3   |       | 0.66  | 0.67  | 0.66  | 0.99 | 1.01 |
| SYF2    |       | 0.94  | 0.78  | 0.93  | 0.99 | 0.83 |
| EIF3D   |       | 0.84  | 0.83  | 0.83  | 0.99 | 0.98 |
| NDUFB5  |       | 1.30  | 1.32  | 1.29  | 0.99 | 1.02 |
| MAFB    |       | 2.53  | 1.78  | 2.51  | 0.99 | 0.70 |
| CCL3    |       | 4.79  | 2.93  | 4.75  | 0.99 | 0.61 |
|         | 7-Sep | 1.32  | 1.14  | 1.30  | 0.99 | 0.87 |
| RHOG    |       | 1.42  | 1.49  | 1.41  | 0.99 | 1.05 |
| HEXA    |       | 1.12  | 1.18  | 1.11  | 0.99 | 1.06 |
| RPS27A  |       | 26.89 | 24.21 | 26.61 | 0.99 | 0.90 |
| PPCS    |       | 0.78  | 0.88  | 0.77  | 0.99 | 1.12 |
| DNAJC15 |       | 1.30  | 1.43  | 1.28  | 0.99 | 1.10 |
| ME2     |       | 0.65  | 0.76  | 0.64  | 0.99 | 1.17 |
| SLC31A2 |       | 1.62  | 1.79  | 1.60  | 0.99 | 1.10 |
| STAU1   |       | 0.53  | 0.55  | 0.52  | 0.99 | 1.03 |
| HSD17B4 |       | 0.63  | 0.55  | 0.62  | 0.99 | 0.87 |
| ANP32A  |       | 0.52  | 0.45  | 0.52  | 0.99 | 0.86 |
| TUBA1A  |       | 1.02  | 0.77  | 1.00  | 0.99 | 0.76 |
| TRMT112 |       | 2.48  | 2.13  | 2.45  | 0.99 | 0.86 |
| HNMT    |       | 1.63  | 1.28  | 1.60  | 0.99 | 0.79 |
| TUBA1B  |       | 9.53  | 10.35 | 9.39  | 0.99 | 1.09 |
| CCDC107 |       | 0.96  | 0.90  | 0.95  | 0.98 | 0.93 |
| FLOT1   |       | 0.83  | 0.77  | 0.81  | 0.98 | 0.93 |
| IDS     |       | 0.70  | 0.62  | 0.69  | 0.98 | 0.89 |
| TMED10  |       | 2.17  | 2.05  | 2.13  | 0.98 | 0.95 |
| LSM2    |       | 0.67  | 0.85  | 0.65  | 0.98 | 1.28 |
| RPL5    |       | 9.71  | 9.16  | 9.53  | 0.98 | 0.94 |
| CLK1    |       | 0.77  | 0.71  | 0.76  | 0.98 | 0.92 |
| TBCA    |       | 3.07  | 2.70  | 3.01  | 0.98 | 0.88 |
| TLN1    |       | 0.78  | 0.85  | 0.77  | 0.98 | 1.09 |

|          |       |       |       |      |      |
|----------|-------|-------|-------|------|------|
| ADAR     | 0.54  | 0.54  | 0.53  | 0.98 | 1.00 |
| SERPINB1 | 1.36  | 1.48  | 1.33  | 0.98 | 1.09 |
| SNRPE    | 1.67  | 1.55  | 1.63  | 0.98 | 0.93 |
| MYADM    | 0.86  | 0.70  | 0.85  | 0.98 | 0.82 |
| TACC1    | 0.53  | 0.55  | 0.52  | 0.98 | 1.02 |
| TMEM9B   | 0.81  | 0.90  | 0.80  | 0.98 | 1.10 |
| USP15    | 0.68  | 0.59  | 0.66  | 0.98 | 0.87 |
| DPY30    | 0.82  | 0.78  | 0.80  | 0.98 | 0.95 |
| RNF5     | 0.53  | 0.49  | 0.52  | 0.98 | 0.93 |
| ARPC4    | 1.64  | 2.13  | 1.60  | 0.98 | 1.30 |
| HSBP1    | 3.08  | 2.70  | 3.02  | 0.98 | 0.87 |
| NCKAP1L  | 0.66  | 0.72  | 0.64  | 0.98 | 1.11 |
| IL13RA1  | 0.81  | 0.77  | 0.79  | 0.98 | 0.96 |
| C6orf48  | 1.75  | 1.44  | 1.71  | 0.98 | 0.82 |
| NPM1     | 5.23  | 4.98  | 5.10  | 0.98 | 0.95 |
| AIF1     | 8.11  | 7.91  | 7.91  | 0.97 | 0.97 |
| GSTK1    | 1.23  | 1.34  | 1.20  | 0.97 | 1.08 |
| GGNBP2   | 0.52  | 0.47  | 0.50  | 0.97 | 0.92 |
| GUK1     | 3.33  | 3.72  | 3.24  | 0.97 | 1.12 |
| CCNI     | 3.32  | 3.51  | 3.24  | 0.97 | 1.06 |
| EMC3     | 0.66  | 0.67  | 0.64  | 0.97 | 1.02 |
| MYL12B   | 4.50  | 3.64  | 4.38  | 0.97 | 0.81 |
| REXO2    | 0.53  | 0.50  | 0.51  | 0.97 | 0.95 |
| RALBP1   | 0.58  | 0.61  | 0.57  | 0.97 | 1.05 |
| SEPW1    | 1.37  | 1.62  | 1.33  | 0.97 | 1.18 |
| RPL14    | 15.88 | 14.33 | 15.43 | 0.97 | 0.90 |
| ATP1A1   | 0.95  | 0.84  | 0.93  | 0.97 | 0.88 |
| TMEM160  | 1.32  | 1.30  | 1.28  | 0.97 | 0.99 |
| YWHAQ    | 1.35  | 1.36  | 1.31  | 0.97 | 1.01 |
| CHMP5    | 0.99  | 0.88  | 0.96  | 0.97 | 0.89 |
| LYZ      | 18.26 | 20.31 | 17.71 | 0.97 | 1.11 |
| HSPA1B   | 1.00  | 0.20  | 0.97  | 0.97 | 0.21 |
| SUMO3    | 1.77  | 1.78  | 1.72  | 0.97 | 1.00 |
| IRS2     | 0.79  | 0.71  | 0.76  | 0.97 | 0.90 |
| SERBP1   | 1.82  | 1.78  | 1.76  | 0.97 | 0.97 |
| RPS23    | 27.93 | 24.05 | 26.98 | 0.97 | 0.86 |
| DYNLT3   | 0.54  | 0.52  | 0.52  | 0.97 | 0.97 |
| PTPN2    | 0.57  | 0.60  | 0.55  | 0.97 | 1.05 |
| SYPL1    | 0.59  | 0.53  | 0.57  | 0.97 | 0.90 |
| POLR2K   | 1.09  | 1.00  | 1.05  | 0.97 | 0.92 |
| TMEM147  | 2.19  | 2.50  | 2.12  | 0.96 | 1.14 |
| TPM3     | 3.32  | 3.47  | 3.21  | 0.96 | 1.04 |

|           |       |       |       |      |      |
|-----------|-------|-------|-------|------|------|
| FIS1      | 1.49  | 1.46  | 1.44  | 0.96 | 0.98 |
| SAT1      | 38.82 | 33.60 | 37.43 | 0.96 | 0.87 |
| POLR2G    | 0.70  | 0.56  | 0.67  | 0.96 | 0.80 |
| LAPTM5    | 9.71  | 10.26 | 9.34  | 0.96 | 1.06 |
| SLC25A3   | 3.44  | 3.41  | 3.31  | 0.96 | 0.99 |
| TRAPPC1   | 1.44  | 1.51  | 1.39  | 0.96 | 1.05 |
| GPX3      | 0.66  | 0.53  | 0.63  | 0.96 | 0.81 |
| CHMP3     | 0.65  | 0.61  | 0.62  | 0.96 | 0.94 |
| RER1      | 1.27  | 1.47  | 1.22  | 0.96 | 1.16 |
| ARPC2     | 10.58 | 11.50 | 10.16 | 0.96 | 1.09 |
| LAP3      | 1.32  | 1.21  | 1.26  | 0.96 | 0.92 |
| C14orf119 | 0.61  | 0.49  | 0.58  | 0.96 | 0.82 |
| FKBP3     | 0.61  | 0.56  | 0.59  | 0.96 | 0.92 |
| UBE2I     | 1.12  | 1.09  | 1.07  | 0.96 | 0.97 |
| ACTN1     | 0.95  | 0.88  | 0.91  | 0.96 | 0.93 |
| HSPB1     | 3.78  | 2.78  | 3.62  | 0.96 | 0.74 |
| MFF       | 0.65  | 0.64  | 0.62  | 0.96 | 0.99 |
| ATP5O     | 3.09  | 2.71  | 2.96  | 0.96 | 0.88 |
| ATP5G2    | 5.67  | 5.46  | 5.43  | 0.96 | 0.96 |
| ELF1      | 1.16  | 0.98  | 1.11  | 0.96 | 0.85 |
| TMEM183A  | 0.59  | 0.59  | 0.57  | 0.96 | 1.00 |
| HPS1      | 0.54  | 0.52  | 0.52  | 0.96 | 0.97 |
| IFITM2    | 0.92  | 0.76  | 0.87  | 0.95 | 0.83 |
| RTF1      | 0.59  | 0.53  | 0.56  | 0.95 | 0.90 |
| NDUFAF3   | 1.18  | 1.34  | 1.13  | 0.95 | 1.14 |
| SLC43A3   | 0.59  | 0.54  | 0.56  | 0.95 | 0.92 |
| BCL2A1    | 3.07  | 1.77  | 2.93  | 0.95 | 0.57 |
| DDX24     | 0.72  | 0.62  | 0.69  | 0.95 | 0.86 |
| IDH3G     | 0.64  | 0.67  | 0.61  | 0.95 | 1.03 |
| DYNC1I2   | 0.68  | 0.63  | 0.65  | 0.95 | 0.93 |
| ATP5D     | 2.87  | 2.74  | 2.73  | 0.95 | 0.96 |
| RNF13     | 2.11  | 1.97  | 2.01  | 0.95 | 0.93 |
| PSMA3     | 0.92  | 0.74  | 0.88  | 0.95 | 0.80 |
| PNISR     | 0.69  | 0.59  | 0.65  | 0.95 | 0.87 |
| GADD45B   | 2.15  | 1.60  | 2.05  | 0.95 | 0.74 |
| AKIRIN2   | 1.10  | 1.11  | 1.05  | 0.95 | 1.01 |
| POLR1D    | 1.38  | 1.36  | 1.32  | 0.95 | 0.99 |
| NDUFC2    | 2.37  | 1.97  | 2.25  | 0.95 | 0.83 |
| PNRC1     | 4.50  | 3.55  | 4.27  | 0.95 | 0.79 |
| SPG21     | 1.96  | 2.00  | 1.86  | 0.95 | 1.02 |
| PPIG      | 1.01  | 0.94  | 0.96  | 0.95 | 0.93 |
| BSG       | 1.73  | 1.87  | 1.64  | 0.95 | 1.08 |

|         |       |       |       |      |      |
|---------|-------|-------|-------|------|------|
| VKORC1  | 1.28  | 1.34  | 1.21  | 0.95 | 1.05 |
| IFNAR1  | 0.60  | 0.59  | 0.57  | 0.95 | 0.99 |
| RWDD1   | 1.62  | 1.53  | 1.53  | 0.95 | 0.94 |
| AVPI1   | 1.29  | 1.55  | 1.22  | 0.95 | 1.21 |
| ALKBH7  | 1.00  | 1.06  | 0.94  | 0.95 | 1.06 |
| TXNL1   | 0.92  | 0.79  | 0.87  | 0.95 | 0.86 |
| PARVB   | 0.56  | 0.57  | 0.53  | 0.95 | 1.03 |
| ATP5E   | 19.03 | 15.85 | 18.00 | 0.95 | 0.83 |
| CAPZA2  | 2.21  | 1.84  | 2.09  | 0.95 | 0.83 |
| S100A8  | 5.30  | 4.63  | 5.02  | 0.95 | 0.87 |
| ZNF331  | 1.95  | 2.37  | 1.84  | 0.95 | 1.22 |
| MIR22HG | 0.57  | 0.51  | 0.54  | 0.95 | 0.89 |
| PTPRC   | 1.20  | 1.06  | 1.13  | 0.95 | 0.89 |
| RPS15A  | 24.74 | 19.03 | 23.38 | 0.94 | 0.77 |
| NCOR1   | 0.71  | 0.69  | 0.67  | 0.94 | 0.96 |
| CAPN2   | 0.87  | 0.88  | 0.82  | 0.94 | 1.01 |
| FCER1G  | 22.47 | 20.48 | 21.19 | 0.94 | 0.91 |
| TMEM205 | 0.54  | 0.50  | 0.51  | 0.94 | 0.92 |
| CNDP2   | 1.10  | 1.18  | 1.04  | 0.94 | 1.07 |
| ABHD12  | 0.96  | 1.16  | 0.91  | 0.94 | 1.20 |
| MRPL34  | 0.90  | 0.93  | 0.85  | 0.94 | 1.04 |
| AGTRAP  | 0.64  | 0.71  | 0.60  | 0.94 | 1.11 |
| COA3    | 0.67  | 0.72  | 0.63  | 0.94 | 1.08 |
| TNFAIP3 | 2.51  | 1.66  | 2.36  | 0.94 | 0.66 |
| ZFAS1   | 4.21  | 3.40  | 3.96  | 0.94 | 0.81 |
| PPDPF   | 3.31  | 3.52  | 3.11  | 0.94 | 1.07 |
| PPP1R18 | 0.80  | 0.69  | 0.75  | 0.94 | 0.87 |
| GPR183  | 3.68  | 2.05  | 3.45  | 0.94 | 0.56 |
| NDUFV1  | 0.61  | 0.55  | 0.57  | 0.94 | 0.90 |
| CD151   | 0.82  | 0.97  | 0.77  | 0.94 | 1.18 |
| TAPBP   | 0.98  | 1.01  | 0.92  | 0.94 | 1.04 |
| SYNGR2  | 1.32  | 1.52  | 1.24  | 0.94 | 1.14 |
| AFF4    | 0.59  | 0.54  | 0.55  | 0.94 | 0.91 |
| EIF3G   | 1.49  | 1.41  | 1.39  | 0.94 | 0.95 |
| PSMC2   | 0.59  | 0.57  | 0.55  | 0.94 | 0.96 |
| P2RX4   | 0.84  | 0.92  | 0.79  | 0.94 | 1.10 |
| PCBP1   | 3.54  | 2.91  | 3.31  | 0.94 | 0.82 |
| SRI     | 1.23  | 1.11  | 1.15  | 0.94 | 0.90 |
| SAP18   | 3.13  | 2.67  | 2.93  | 0.94 | 0.85 |
| EFHD2   | 1.27  | 1.33  | 1.19  | 0.94 | 1.05 |
| UBE2J1  | 0.88  | 0.83  | 0.82  | 0.94 | 0.94 |
| MESDC2  | 0.61  | 0.57  | 0.57  | 0.94 | 0.94 |

|          |       |       |       |      |      |
|----------|-------|-------|-------|------|------|
| CTSA     | 1.79  | 2.05  | 1.67  | 0.94 | 1.15 |
| ABHD5    | 0.76  | 0.91  | 0.71  | 0.93 | 1.21 |
| GDE1     | 0.55  | 0.46  | 0.52  | 0.93 | 0.83 |
| PRDX3    | 1.43  | 1.19  | 1.34  | 0.93 | 0.83 |
| VPS35    | 0.92  | 0.82  | 0.86  | 0.93 | 0.89 |
| NUTF2    | 0.90  | 0.82  | 0.84  | 0.93 | 0.91 |
| CXCL16   | 2.35  | 2.17  | 2.19  | 0.93 | 0.93 |
| COX7C    | 8.05  | 7.04  | 7.51  | 0.93 | 0.87 |
| C19orf24 | 0.96  | 1.15  | 0.89  | 0.93 | 1.21 |
| IFNGR1   | 1.48  | 1.14  | 1.38  | 0.93 | 0.77 |
| HCLS1    | 0.91  | 0.83  | 0.85  | 0.93 | 0.90 |
| RSU1     | 0.75  | 0.66  | 0.70  | 0.93 | 0.88 |
| SCAF11   | 1.03  | 0.96  | 0.96  | 0.93 | 0.94 |
| B4GALT1  | 0.99  | 1.10  | 0.92  | 0.93 | 1.11 |
| RPL6     | 14.37 | 14.08 | 13.40 | 0.93 | 0.98 |
| SPCS1    | 2.12  | 2.10  | 1.97  | 0.93 | 0.99 |
| CLTC     | 1.14  | 1.01  | 1.06  | 0.93 | 0.89 |
| RPS12    | 46.72 | 41.70 | 43.51 | 0.93 | 0.89 |
| TOP1     | 0.95  | 0.90  | 0.88  | 0.93 | 0.94 |
| IQGAP1   | 1.73  | 1.46  | 1.61  | 0.93 | 0.84 |
| COMT     | 2.21  | 2.31  | 2.06  | 0.93 | 1.04 |
| GSTO1    | 6.29  | 5.68  | 5.85  | 0.93 | 0.90 |
| HNRNPA3  | 1.96  | 1.63  | 1.82  | 0.93 | 0.84 |
| RTN4     | 4.58  | 4.28  | 4.26  | 0.93 | 0.93 |
| ZFP36    | 4.73  | 4.37  | 4.39  | 0.93 | 0.92 |
| DHX36    | 0.64  | 0.52  | 0.59  | 0.93 | 0.82 |
| CDC42    | 4.49  | 4.66  | 4.16  | 0.93 | 1.04 |
| TMEM14B  | 1.46  | 1.55  | 1.35  | 0.93 | 1.06 |
| HTATIP2  | 0.86  | 0.97  | 0.80  | 0.93 | 1.12 |
| LGALS9   | 1.30  | 1.29  | 1.20  | 0.93 | 1.00 |
| ARHGDIB  | 3.86  | 3.52  | 3.59  | 0.93 | 0.91 |
| TERF2IP  | 0.60  | 0.49  | 0.56  | 0.93 | 0.81 |
| RAB13    | 2.15  | 1.85  | 1.99  | 0.93 | 0.86 |
| MAP3K2   | 0.71  | 0.66  | 0.66  | 0.93 | 0.93 |
| LCP1     | 2.32  | 1.95  | 2.15  | 0.93 | 0.84 |
| VAMP3    | 0.71  | 0.63  | 0.66  | 0.93 | 0.89 |
| RPN2     | 1.38  | 1.15  | 1.27  | 0.93 | 0.84 |
| GTF2H5   | 0.97  | 0.92  | 0.90  | 0.93 | 0.95 |
| CD53     | 2.70  | 2.08  | 2.50  | 0.93 | 0.77 |
| PGAM1    | 2.02  | 2.00  | 1.87  | 0.93 | 0.99 |
| RAP1A    | 2.26  | 2.01  | 2.09  | 0.92 | 0.89 |
| RAB4A    | 0.72  | 0.67  | 0.66  | 0.92 | 0.93 |

|           |       |       |       |      |      |
|-----------|-------|-------|-------|------|------|
| VPS29     | 2.18  | 1.78  | 2.01  | 0.92 | 0.81 |
| RPL4      | 7.90  | 7.42  | 7.29  | 0.92 | 0.94 |
| ACTR3     | 2.13  | 2.14  | 1.96  | 0.92 | 1.00 |
| IGSF6     | 1.99  | 1.88  | 1.83  | 0.92 | 0.95 |
| ARPP19    | 0.67  | 0.53  | 0.62  | 0.92 | 0.79 |
| C14orf166 | 1.52  | 1.41  | 1.40  | 0.92 | 0.93 |
| PSMC6     | 0.62  | 0.44  | 0.57  | 0.92 | 0.71 |
| RNF114    | 0.62  | 0.49  | 0.57  | 0.92 | 0.78 |
| BAG1      | 1.03  | 1.12  | 0.95  | 0.92 | 1.09 |
| SLC16A3   | 1.49  | 1.46  | 1.37  | 0.92 | 0.98 |
| C1orf122  | 0.72  | 0.83  | 0.67  | 0.92 | 1.14 |
| TM9SF3    | 0.63  | 0.55  | 0.58  | 0.92 | 0.86 |
| GLUL      | 15.09 | 19.16 | 13.86 | 0.92 | 1.27 |
| LARP7     | 0.57  | 0.47  | 0.52  | 0.92 | 0.82 |
| NDUFS8    | 1.59  | 1.50  | 1.46  | 0.92 | 0.94 |
| PGLS      | 1.68  | 1.75  | 1.54  | 0.92 | 1.04 |
| ZNHIT1    | 1.46  | 1.48  | 1.34  | 0.92 | 1.01 |
| ATP6V1G1  | 5.52  | 4.97  | 5.07  | 0.92 | 0.90 |
| PSMB4     | 0.79  | 0.68  | 0.72  | 0.92 | 0.86 |
| C1orf43   | 1.85  | 1.92  | 1.70  | 0.92 | 1.04 |
| NDUFB3    | 1.63  | 1.37  | 1.50  | 0.92 | 0.84 |
| RAB21     | 0.58  | 0.53  | 0.53  | 0.92 | 0.90 |
| NAA10     | 0.72  | 0.72  | 0.66  | 0.92 | 1.00 |
| SET       | 1.63  | 1.80  | 1.49  | 0.92 | 1.11 |
| BTF3      | 6.86  | 5.88  | 6.29  | 0.92 | 0.86 |
| CYB5R4    | 0.59  | 0.63  | 0.54  | 0.92 | 1.06 |
| CELF1     | 0.64  | 0.48  | 0.58  | 0.92 | 0.75 |
| C19orf43  | 2.36  | 2.22  | 2.16  | 0.91 | 0.94 |
| AKR1A1    | 1.68  | 1.82  | 1.54  | 0.91 | 1.08 |
| BST2      | 1.50  | 1.35  | 1.37  | 0.91 | 0.90 |
| EMP3      | 9.09  | 8.32  | 8.30  | 0.91 | 0.92 |
| CNPY3     | 1.25  | 1.30  | 1.14  | 0.91 | 1.04 |
| FIBP      | 0.91  | 1.04  | 0.83  | 0.91 | 1.15 |
| CD46      | 0.63  | 0.47  | 0.58  | 0.91 | 0.74 |
| NAA20     | 0.93  | 0.88  | 0.85  | 0.91 | 0.95 |
| HDLBP     | 0.72  | 0.82  | 0.66  | 0.91 | 1.14 |
| PDE4DIP   | 0.77  | 0.67  | 0.70  | 0.91 | 0.87 |
| ANXA1     | 9.39  | 6.26  | 8.56  | 0.91 | 0.67 |
| RPL30     | 21.44 | 18.32 | 19.53 | 0.91 | 0.85 |
| ST13      | 2.20  | 2.03  | 2.01  | 0.91 | 0.92 |
| STAT3     | 0.66  | 0.71  | 0.60  | 0.91 | 1.08 |
| LSM3      | 1.75  | 1.67  | 1.59  | 0.91 | 0.96 |



|          |       |       |       |      |      |
|----------|-------|-------|-------|------|------|
| UBA52    | 17.60 | 16.13 | 16.02 | 0.91 | 0.92 |
| CCDC88A  | 1.46  | 1.37  | 1.33  | 0.91 | 0.94 |
| GBAS     | 0.62  | 0.55  | 0.56  | 0.91 | 0.89 |
| TGOLN2   | 1.33  | 1.17  | 1.21  | 0.91 | 0.88 |
| CHMP2A   | 1.54  | 1.36  | 1.40  | 0.91 | 0.88 |
| EIF3A    | 1.22  | 1.12  | 1.11  | 0.91 | 0.92 |
| BCKDK    | 0.65  | 0.66  | 0.59  | 0.91 | 1.02 |
| DCTN3    | 0.72  | 0.66  | 0.65  | 0.91 | 0.92 |
| SYK      | 0.57  | 0.56  | 0.52  | 0.91 | 0.98 |
| QKI      | 1.20  | 1.03  | 1.09  | 0.91 | 0.86 |
| RPL27A   | 27.86 | 25.77 | 25.24 | 0.91 | 0.93 |
| ARPC3    | 10.11 | 9.30  | 9.16  | 0.91 | 0.92 |
| RPL26L1  | 0.68  | 0.58  | 0.61  | 0.91 | 0.85 |
| RIT1     | 0.59  | 0.58  | 0.54  | 0.90 | 0.98 |
| SDHD     | 0.93  | 0.85  | 0.84  | 0.90 | 0.92 |
| SP100    | 0.78  | 0.63  | 0.71  | 0.90 | 0.81 |
| OST4     | 4.99  | 4.79  | 4.51  | 0.90 | 0.96 |
| ARL8B    | 1.02  | 0.91  | 0.92  | 0.90 | 0.89 |
| UBE2R2   | 0.87  | 0.72  | 0.79  | 0.90 | 0.82 |
| RPS6     | 27.54 | 24.11 | 24.88 | 0.90 | 0.88 |
| MAT2A    | 0.82  | 0.90  | 0.74  | 0.90 | 1.09 |
| ACAA2    | 0.61  | 0.66  | 0.55  | 0.90 | 1.08 |
| IRAK1    | 0.72  | 0.69  | 0.65  | 0.90 | 0.97 |
| UBE2E1   | 0.71  | 0.59  | 0.64  | 0.90 | 0.83 |
| JUNB     | 6.38  | 6.43  | 5.76  | 0.90 | 1.01 |
| NDUFB1   | 2.12  | 1.75  | 1.91  | 0.90 | 0.83 |
| MTCH2    | 1.03  | 0.97  | 0.93  | 0.90 | 0.94 |
| NDUFB6   | 1.24  | 1.00  | 1.12  | 0.90 | 0.80 |
| CEP170   | 0.64  | 0.52  | 0.58  | 0.90 | 0.82 |
| EPAS1    | 0.56  | 0.63  | 0.51  | 0.90 | 1.13 |
| RAB1A    | 2.48  | 2.03  | 2.24  | 0.90 | 0.82 |
| CHCHD1   | 0.83  | 0.72  | 0.75  | 0.90 | 0.87 |
| NDUFB4   | 1.65  | 1.33  | 1.49  | 0.90 | 0.81 |
| RAB2A    | 1.45  | 1.23  | 1.31  | 0.90 | 0.85 |
| FAM177A1 | 0.75  | 0.76  | 0.67  | 0.90 | 1.02 |
| SUMO2    | 4.55  | 4.21  | 4.10  | 0.90 | 0.93 |
| BLVRA    | 1.02  | 0.91  | 0.91  | 0.90 | 0.90 |
| PRDX6    | 1.92  | 1.74  | 1.73  | 0.90 | 0.91 |
| FUNDC2   | 0.58  | 0.54  | 0.52  | 0.90 | 0.93 |
| EEF2     | 4.16  | 4.00  | 3.74  | 0.90 | 0.96 |
| PDCD6IP  | 0.78  | 0.70  | 0.71  | 0.90 | 0.89 |
| RPL23    | 13.31 | 11.25 | 11.97 | 0.90 | 0.85 |

|            |        |       |       |       |      |      |
|------------|--------|-------|-------|-------|------|------|
| SRSF5      |        | 1.80  | 1.54  | 1.62  | 0.90 | 0.86 |
| LACTB      |        | 1.28  | 1.24  | 1.15  | 0.90 | 0.97 |
| RAB9A      |        | 0.59  | 0.47  | 0.53  | 0.90 | 0.80 |
| ABL2       |        | 1.49  | 1.21  | 1.34  | 0.90 | 0.81 |
| RPS11      |        | 14.27 | 12.59 | 12.82 | 0.90 | 0.88 |
| GYPC       |        | 1.03  | 1.14  | 0.92  | 0.90 | 1.11 |
| GMFG       |        | 2.79  | 2.46  | 2.50  | 0.90 | 0.88 |
| SLC25A39   |        | 0.61  | 0.79  | 0.54  | 0.90 | 1.30 |
| RPL13A     |        | 43.02 | 38.34 | 38.56 | 0.90 | 0.89 |
| CNBP       |        | 2.80  | 2.60  | 2.51  | 0.90 | 0.93 |
| TRAPPC2L   |        | 1.09  | 1.01  | 0.98  | 0.90 | 0.92 |
| LINC01420  |        | 1.01  | 1.15  | 0.91  | 0.90 | 1.14 |
| UBXN1      |        | 1.61  | 1.42  | 1.44  | 0.89 | 0.88 |
|            | 15-Sep | 2.16  | 1.89  | 1.93  | 0.89 | 0.87 |
| RPL22L1    |        | 1.82  | 1.71  | 1.63  | 0.89 | 0.94 |
| SKP1       |        | 2.96  | 2.44  | 2.64  | 0.89 | 0.83 |
| SDF4       |        | 0.80  | 0.83  | 0.71  | 0.89 | 1.05 |
| RPS9       |        | 22.55 | 21.28 | 20.17 | 0.89 | 0.94 |
| SPAG9      |        | 0.57  | 0.48  | 0.51  | 0.89 | 0.84 |
| RSL1D1     |        | 1.19  | 0.99  | 1.06  | 0.89 | 0.84 |
| EIF2S3     |        | 0.64  | 0.63  | 0.57  | 0.89 | 0.98 |
| UBL3       |        | 0.58  | 0.49  | 0.52  | 0.89 | 0.84 |
| SSU72      |        | 1.46  | 1.54  | 1.30  | 0.89 | 1.06 |
| MYL6       |        | 23.66 | 21.05 | 21.11 | 0.89 | 0.89 |
| CAMTA1     |        | 1.21  | 0.98  | 1.08  | 0.89 | 0.81 |
| CORO1C     |        | 1.86  | 1.86  | 1.66  | 0.89 | 1.00 |
| ITPA       |        | 0.57  | 0.56  | 0.51  | 0.89 | 0.99 |
| NCEH1      |        | 0.87  | 0.82  | 0.77  | 0.89 | 0.94 |
| VPS28      |        | 1.40  | 1.39  | 1.24  | 0.89 | 1.00 |
| LUC7L3     |        | 0.72  | 0.51  | 0.64  | 0.89 | 0.71 |
| ATP5C1     |        | 1.84  | 1.69  | 1.64  | 0.89 | 0.92 |
| COMMD6     |        | 3.96  | 3.50  | 3.53  | 0.89 | 0.88 |
| MOB1A      |        | 1.89  | 1.82  | 1.68  | 0.89 | 0.96 |
| RPL24      |        | 12.30 | 10.47 | 10.96 | 0.89 | 0.85 |
| RPS8       |        | 24.37 | 20.61 | 21.69 | 0.89 | 0.85 |
| CSGALNACT2 |        | 0.70  | 0.46  | 0.62  | 0.89 | 0.66 |
| RPS13      |        | 24.80 | 20.26 | 22.07 | 0.89 | 0.82 |
| PPP1R11    |        | 0.59  | 0.67  | 0.52  | 0.89 | 1.14 |
| LEPROT     |        | 1.34  | 1.08  | 1.19  | 0.89 | 0.81 |
| EMC4       |        | 0.79  | 0.66  | 0.70  | 0.89 | 0.84 |
| HSPB11     |        | 0.58  | 0.50  | 0.51  | 0.89 | 0.88 |
| TANK       |        | 0.66  | 0.49  | 0.59  | 0.89 | 0.73 |

|           |       |       |       |      |      |
|-----------|-------|-------|-------|------|------|
| MRPS16    | 0.98  | 1.02  | 0.87  | 0.89 | 1.05 |
| TMEM126B  | 0.60  | 0.57  | 0.53  | 0.89 | 0.95 |
| RRAGC     | 0.58  | 0.51  | 0.51  | 0.89 | 0.88 |
| DYNLL1    | 6.17  | 5.62  | 5.48  | 0.89 | 0.91 |
| NDUFB9    | 2.66  | 2.43  | 2.36  | 0.89 | 0.91 |
| TMBIM1    | 0.86  | 0.83  | 0.76  | 0.89 | 0.96 |
| SYNCRIP   | 0.76  | 0.74  | 0.67  | 0.89 | 0.98 |
| HSPA1A    | 3.63  | 0.84  | 3.22  | 0.89 | 0.23 |
| ATP13A3   | 1.16  | 0.92  | 1.03  | 0.89 | 0.79 |
| PPA2      | 0.65  | 0.67  | 0.58  | 0.88 | 1.04 |
| SF3B6     | 1.94  | 1.56  | 1.72  | 0.88 | 0.81 |
| NDUFS7    | 1.90  | 1.69  | 1.68  | 0.88 | 0.89 |
| RIOK3     | 0.61  | 0.59  | 0.54  | 0.88 | 0.96 |
| EIF4A1    | 1.40  | 1.22  | 1.24  | 0.88 | 0.87 |
| PKM       | 3.67  | 3.74  | 3.25  | 0.88 | 1.02 |
| KPNB1     | 0.73  | 0.60  | 0.65  | 0.88 | 0.82 |
| SELT      | 1.94  | 1.75  | 1.72  | 0.88 | 0.90 |
| BANF1     | 0.94  | 0.94  | 0.83  | 0.88 | 0.99 |
| UFC1      | 1.43  | 1.43  | 1.26  | 0.88 | 1.00 |
| CHMP4A    | 0.85  | 0.78  | 0.75  | 0.88 | 0.92 |
| RAN       | 3.38  | 2.96  | 2.98  | 0.88 | 0.88 |
| IAH1      | 0.92  | 0.84  | 0.81  | 0.88 | 0.92 |
| HP1BP3    | 0.57  | 0.52  | 0.51  | 0.88 | 0.90 |
| RPS16     | 25.50 | 24.10 | 22.47 | 0.88 | 0.94 |
| RPL21     | 39.49 | 31.30 | 34.79 | 0.88 | 0.79 |
| LDHA      | 4.22  | 3.96  | 3.71  | 0.88 | 0.94 |
| CAPZA1    | 1.82  | 1.88  | 1.60  | 0.88 | 1.03 |
| TXNDC12   | 0.64  | 0.58  | 0.56  | 0.88 | 0.90 |
| RPL10A    | 15.56 | 14.02 | 13.69 | 0.88 | 0.90 |
| RAB5C     | 2.08  | 2.01  | 1.83  | 0.88 | 0.97 |
| LINC00493 | 1.21  | 0.97  | 1.07  | 0.88 | 0.79 |
| UBE2D1    | 0.98  | 0.86  | 0.86  | 0.88 | 0.88 |
| PRPF40A   | 0.84  | 0.70  | 0.74  | 0.88 | 0.83 |
| GGCT      | 0.72  | 0.74  | 0.64  | 0.88 | 1.01 |
| GPSM3     | 1.62  | 1.74  | 1.42  | 0.88 | 1.07 |
| ERP29     | 1.57  | 1.59  | 1.38  | 0.88 | 1.01 |
| PEPD      | 1.14  | 0.95  | 1.00  | 0.88 | 0.83 |
| CTSD      | 36.14 | 44.03 | 31.71 | 0.88 | 1.22 |
| ATP5J     | 3.83  | 3.55  | 3.36  | 0.88 | 0.93 |
| ARPC1B    | 6.79  | 8.11  | 5.95  | 0.88 | 1.19 |
| MBNL1     | 1.12  | 0.88  | 0.98  | 0.88 | 0.79 |
| NDUFS3    | 0.76  | 0.68  | 0.67  | 0.88 | 0.89 |

|          |       |       |       |      |      |
|----------|-------|-------|-------|------|------|
| RAB14    | 0.60  | 0.47  | 0.53  | 0.87 | 0.78 |
| LAIR1    | 1.38  | 1.47  | 1.21  | 0.87 | 1.06 |
| YWHAB    | 3.35  | 2.80  | 2.93  | 0.87 | 0.84 |
| DRAP1    | 1.15  | 1.12  | 1.00  | 0.87 | 0.97 |
| POMP     | 6.92  | 5.84  | 6.04  | 0.87 | 0.84 |
| GSPT1    | 0.84  | 0.87  | 0.74  | 0.87 | 1.04 |
| C19orf60 | 1.84  | 1.89  | 1.61  | 0.87 | 1.03 |
| POLR2F   | 0.85  | 0.78  | 0.75  | 0.87 | 0.92 |
| LDHB     | 1.20  | 1.18  | 1.05  | 0.87 | 0.98 |
| CMPK1    | 1.15  | 1.04  | 1.00  | 0.87 | 0.91 |
| BABAM1   | 0.58  | 0.56  | 0.50  | 0.87 | 0.96 |
| CISD3    | 0.94  | 1.13  | 0.82  | 0.87 | 1.21 |
| PABPC1   | 7.74  | 7.43  | 6.74  | 0.87 | 0.96 |
| LST1     | 3.56  | 3.56  | 3.10  | 0.87 | 1.00 |
| XRN2     | 0.69  | 0.63  | 0.60  | 0.87 | 0.91 |
| PTPMT1   | 0.64  | 0.76  | 0.55  | 0.87 | 1.20 |
| BNIP2    | 0.88  | 0.71  | 0.77  | 0.87 | 0.81 |
| GTF3C6   | 1.97  | 1.96  | 1.71  | 0.87 | 0.99 |
| RPL3     | 19.34 | 17.88 | 16.80 | 0.87 | 0.92 |
| RTN3     | 1.12  | 0.99  | 0.97  | 0.87 | 0.88 |
| RPL29    | 17.42 | 15.39 | 15.11 | 0.87 | 0.88 |
| VDAC2    | 2.30  | 1.97  | 1.99  | 0.87 | 0.86 |
| BASP1    | 2.09  | 1.76  | 1.81  | 0.87 | 0.84 |
| ATP6V1D  | 1.00  | 0.91  | 0.86  | 0.87 | 0.92 |
| TMEM256  | 0.87  | 0.75  | 0.75  | 0.87 | 0.86 |
| KCNMA1   | 1.44  | 0.87  | 1.24  | 0.86 | 0.60 |
| PDIA3    | 2.33  | 1.87  | 2.01  | 0.86 | 0.80 |
| NFKBIA   | 12.20 | 8.00  | 10.55 | 0.86 | 0.66 |
| ARL5A    | 0.89  | 0.86  | 0.77  | 0.86 | 0.96 |
| RIPK2    | 0.83  | 0.59  | 0.71  | 0.86 | 0.72 |
| PLP2     | 1.35  | 1.29  | 1.17  | 0.86 | 0.95 |
| RPL11    | 26.16 | 23.05 | 22.57 | 0.86 | 0.88 |
| ATP2A2   | 0.69  | 0.60  | 0.59  | 0.86 | 0.87 |
| VMA21    | 1.45  | 1.33  | 1.26  | 0.86 | 0.91 |
| RNPS1    | 0.76  | 0.67  | 0.65  | 0.86 | 0.89 |
| ATG3     | 1.15  | 0.98  | 0.99  | 0.86 | 0.85 |
| SDCBP    | 7.91  | 5.79  | 6.82  | 0.86 | 0.73 |
| ACTR2    | 2.57  | 2.10  | 2.21  | 0.86 | 0.82 |
| TXNDC17  | 1.98  | 1.72  | 1.71  | 0.86 | 0.87 |
| PSMB5    | 0.93  | 0.80  | 0.80  | 0.86 | 0.86 |
| DCTN6    | 0.67  | 0.49  | 0.57  | 0.86 | 0.74 |
| H2AFJ    | 1.71  | 1.32  | 1.47  | 0.86 | 0.77 |

|          |       |       |       |      |      |
|----------|-------|-------|-------|------|------|
| EIF3F    | 1.77  | 1.74  | 1.52  | 0.86 | 0.98 |
| PTP4A2   | 1.30  | 1.33  | 1.12  | 0.86 | 1.02 |
| NCL      | 1.55  | 1.31  | 1.33  | 0.86 | 0.85 |
| COX4I1   | 8.54  | 8.29  | 7.35  | 0.86 | 0.97 |
| HADHB    | 0.95  | 0.79  | 0.82  | 0.86 | 0.83 |
| HNRNPAB  | 0.79  | 0.66  | 0.68  | 0.86 | 0.84 |
| ANXA5    | 8.79  | 6.61  | 7.56  | 0.86 | 0.75 |
| SCAMP2   | 0.66  | 0.63  | 0.57  | 0.86 | 0.96 |
| NR4A2    | 2.32  | 2.08  | 2.00  | 0.86 | 0.89 |
| HNRNPR   | 0.77  | 0.58  | 0.66  | 0.86 | 0.75 |
| PSMA7    | 8.83  | 8.06  | 7.59  | 0.86 | 0.91 |
| SRRM2    | 0.82  | 0.67  | 0.70  | 0.86 | 0.82 |
| TCEB2    | 6.97  | 6.00  | 5.98  | 0.86 | 0.86 |
| SHFM1    | 2.37  | 1.95  | 2.03  | 0.86 | 0.82 |
| HIGD2A   | 2.58  | 2.45  | 2.22  | 0.86 | 0.95 |
| RPS4Y1   | 0.75  | 0.23  | 0.64  | 0.86 | 0.31 |
| RPS7     | 16.43 | 14.32 | 14.09 | 0.86 | 0.87 |
| AQP9     | 1.21  | 1.10  | 1.04  | 0.86 | 0.91 |
| MIEN1    | 0.86  | 0.98  | 0.74  | 0.86 | 1.14 |
| RAB18    | 0.79  | 0.66  | 0.68  | 0.86 | 0.83 |
| H3F3A    | 16.35 | 14.81 | 14.01 | 0.86 | 0.91 |
| RAB6A    | 0.59  | 0.52  | 0.50  | 0.86 | 0.88 |
| NDUFB10  | 1.79  | 1.86  | 1.53  | 0.86 | 1.04 |
| COLGALT1 | 0.74  | 0.78  | 0.63  | 0.86 | 1.06 |
| MGST3    | 5.77  | 4.35  | 4.94  | 0.86 | 0.75 |
| FBP1     | 6.57  | 7.79  | 5.62  | 0.86 | 1.19 |
| STOML2   | 0.70  | 0.74  | 0.60  | 0.86 | 1.05 |
| RPL32    | 34.58 | 25.85 | 29.59 | 0.86 | 0.75 |
| NDUFA4   | 7.66  | 6.48  | 6.55  | 0.86 | 0.85 |
| SSR4     | 4.41  | 3.99  | 3.77  | 0.86 | 0.90 |
| SLC25A5  | 4.74  | 4.55  | 4.05  | 0.85 | 0.96 |
| PLEKHB2  | 1.68  | 1.60  | 1.43  | 0.85 | 0.95 |
| PFDN5    | 11.74 | 10.69 | 10.03 | 0.85 | 0.91 |
| ZEB2     | 2.26  | 1.82  | 1.93  | 0.85 | 0.80 |
| ATP5L    | 7.89  | 6.50  | 6.73  | 0.85 | 0.82 |
| NONO     | 0.63  | 0.48  | 0.54  | 0.85 | 0.76 |
| CMTM6    | 1.84  | 1.52  | 1.57  | 0.85 | 0.83 |
| TMEM230  | 1.71  | 1.72  | 1.46  | 0.85 | 1.01 |
| BID      | 0.99  | 1.04  | 0.85  | 0.85 | 1.04 |
| ARF1     | 2.89  | 2.81  | 2.46  | 0.85 | 0.98 |
| UBC      | 6.67  | 4.97  | 5.69  | 0.85 | 0.74 |
| PAK2     | 1.04  | 0.90  | 0.89  | 0.85 | 0.86 |

|          |        |        |        |      |      |
|----------|--------|--------|--------|------|------|
| TFEC     | 0.62   | 0.60   | 0.53   | 0.85 | 0.97 |
| ARPC5    | 5.51   | 4.81   | 4.70   | 0.85 | 0.87 |
| KMT2E    | 0.84   | 0.61   | 0.72   | 0.85 | 0.72 |
| CDV3     | 1.15   | 0.92   | 0.98   | 0.85 | 0.80 |
| ERH      | 1.94   | 1.55   | 1.65   | 0.85 | 0.80 |
| PARK7    | 2.94   | 2.74   | 2.50   | 0.85 | 0.93 |
| PSMG2    | 0.92   | 0.80   | 0.78   | 0.85 | 0.87 |
| HNRNPD   | 0.68   | 0.52   | 0.57   | 0.85 | 0.77 |
| MYH9     | 0.80   | 0.74   | 0.68   | 0.85 | 0.93 |
| FNBP1    | 0.62   | 0.52   | 0.52   | 0.85 | 0.84 |
| H2AFY    | 5.91   | 4.81   | 5.02   | 0.85 | 0.81 |
| TAF1D    | 0.96   | 0.64   | 0.82   | 0.85 | 0.66 |
| SLCO2B1  | 1.27   | 1.23   | 1.08   | 0.85 | 0.97 |
| UBE2F    | 0.98   | 0.93   | 0.83   | 0.85 | 0.95 |
| SSBP1    | 1.49   | 1.24   | 1.27   | 0.85 | 0.83 |
| NDUFB7   | 2.84   | 2.58   | 2.41   | 0.85 | 0.91 |
| RPS20    | 27.03  | 24.23  | 22.93  | 0.85 | 0.90 |
| GNB2L1   | 12.05  | 10.62  | 10.23  | 0.85 | 0.88 |
| EZR      | 1.58   | 1.17   | 1.34   | 0.85 | 0.74 |
| YME1L1   | 0.75   | 0.63   | 0.63   | 0.85 | 0.84 |
| MALAT1   | 218.64 | 219.14 | 185.37 | 0.85 | 1.00 |
| KHDRBS1  | 0.99   | 0.82   | 0.84   | 0.85 | 0.83 |
| AUP1     | 1.03   | 1.05   | 0.87   | 0.85 | 1.03 |
| METRNL   | 0.70   | 0.54   | 0.59   | 0.85 | 0.78 |
| RPL13    | 47.54  | 37.86  | 40.26  | 0.85 | 0.80 |
| TKT      | 1.89   | 2.12   | 1.60   | 0.85 | 1.12 |
| CBX3     | 1.15   | 0.91   | 0.98   | 0.85 | 0.79 |
| EIF3I    | 1.15   | 1.07   | 0.97   | 0.85 | 0.93 |
| TMEM208  | 0.98   | 0.91   | 0.83   | 0.85 | 0.92 |
| UBE2L6   | 1.08   | 1.12   | 0.91   | 0.85 | 1.04 |
| SRP72    | 0.88   | 0.84   | 0.74   | 0.85 | 0.96 |
| UQCRH    | 6.04   | 6.02   | 5.11   | 0.85 | 1.00 |
| NDUFA11  | 2.66   | 2.24   | 2.24   | 0.85 | 0.84 |
| OSTF1    | 1.46   | 1.34   | 1.24   | 0.84 | 0.92 |
| TMEM38B  | 0.66   | 0.69   | 0.56   | 0.84 | 1.05 |
| HMG3     | 1.19   | 1.19   | 1.01   | 0.84 | 1.00 |
| HLA-B    | 26.27  | 22.16  | 22.17  | 0.84 | 0.84 |
| SNX2     | 1.35   | 1.06   | 1.14   | 0.84 | 0.78 |
| MAP1LC3B | 2.63   | 2.02   | 2.22   | 0.84 | 0.77 |
| EIF3M    | 1.37   | 1.10   | 1.15   | 0.84 | 0.80 |
| DAZAP2   | 1.90   | 1.45   | 1.60   | 0.84 | 0.76 |
| RPL19    | 27.10  | 24.43  | 22.85  | 0.84 | 0.90 |

|          |       |       |       |      |      |
|----------|-------|-------|-------|------|------|
| FAU      | 19.02 | 15.46 | 16.02 | 0.84 | 0.81 |
| AKAP13   | 1.67  | 1.54  | 1.41  | 0.84 | 0.92 |
| PCBP2    | 2.62  | 2.24  | 2.21  | 0.84 | 0.85 |
| VDAC1    | 2.42  | 2.46  | 2.04  | 0.84 | 1.02 |
| ATP5H    | 2.59  | 2.25  | 2.18  | 0.84 | 0.87 |
| YWHAZ    | 3.52  | 2.84  | 2.96  | 0.84 | 0.81 |
| COX20    | 0.84  | 0.75  | 0.70  | 0.84 | 0.90 |
| RPS17    | 24.11 | 18.90 | 20.23 | 0.84 | 0.78 |
| LYPLA1   | 0.78  | 0.73  | 0.65  | 0.84 | 0.94 |
| FAM49A   | 0.84  | 0.67  | 0.70  | 0.84 | 0.80 |
| DPP7     | 1.91  | 1.91  | 1.60  | 0.84 | 1.00 |
| TCF25    | 0.95  | 0.79  | 0.79  | 0.84 | 0.84 |
| C16orf13 | 0.97  | 0.75  | 0.81  | 0.84 | 0.77 |
| PRPF38B  | 0.74  | 0.57  | 0.62  | 0.84 | 0.77 |
| PICALM   | 0.97  | 0.79  | 0.81  | 0.84 | 0.82 |
| NFKB1    | 0.78  | 0.53  | 0.66  | 0.84 | 0.68 |
| RPL34    | 29.93 | 20.18 | 25.07 | 0.84 | 0.67 |
| OPN3     | 0.88  | 0.76  | 0.73  | 0.84 | 0.87 |
| RENBP    | 0.63  | 0.52  | 0.53  | 0.84 | 0.83 |
| HDDC2    | 0.80  | 0.85  | 0.67  | 0.84 | 1.05 |
| PLIN2    | 8.55  | 6.43  | 7.16  | 0.84 | 0.75 |
| YWHAE    | 1.84  | 1.63  | 1.54  | 0.84 | 0.89 |
| COPA     | 0.63  | 0.53  | 0.53  | 0.84 | 0.84 |
| WDR83OS  | 2.04  | 1.95  | 1.70  | 0.84 | 0.96 |
| RPL15    | 25.86 | 23.03 | 21.60 | 0.84 | 0.89 |
| PDIA6    | 2.50  | 2.04  | 2.09  | 0.84 | 0.81 |
| UQCRC1   | 1.10  | 0.96  | 0.92  | 0.84 | 0.87 |
| RSRC2    | 0.71  | 0.54  | 0.60  | 0.83 | 0.76 |
| SERF2    | 25.98 | 26.22 | 21.68 | 0.83 | 1.01 |
| LSM1     | 0.76  | 0.74  | 0.63  | 0.83 | 0.97 |
| PAFAH1B1 | 0.61  | 0.48  | 0.50  | 0.83 | 0.79 |
| COX5A    | 3.96  | 3.60  | 3.30  | 0.83 | 0.91 |
| GHITM    | 1.72  | 1.58  | 1.43  | 0.83 | 0.92 |
| DBNL     | 0.79  | 0.78  | 0.65  | 0.83 | 0.99 |
| ACP5     | 9.30  | 8.35  | 7.74  | 0.83 | 0.90 |
| MORF4L1  | 3.06  | 2.49  | 2.55  | 0.83 | 0.81 |
| HPCAL1   | 0.87  | 0.86  | 0.72  | 0.83 | 0.99 |
| PSMB6    | 1.74  | 1.59  | 1.45  | 0.83 | 0.91 |
| DUSP3    | 0.75  | 0.64  | 0.62  | 0.83 | 0.85 |
| C1QA     | 18.95 | 18.21 | 15.75 | 0.83 | 0.96 |
| EDF1     | 3.30  | 2.98  | 2.74  | 0.83 | 0.90 |
| RNH1     | 2.68  | 2.66  | 2.23  | 0.83 | 0.99 |

|          |       |       |       |      |      |
|----------|-------|-------|-------|------|------|
| TOMM7    | 4.81  | 3.64  | 4.00  | 0.83 | 0.76 |
| ATP6V0B  | 8.15  | 7.53  | 6.76  | 0.83 | 0.92 |
| TCIRG1   | 0.89  | 0.82  | 0.74  | 0.83 | 0.92 |
| RNF7     | 2.13  | 2.07  | 1.77  | 0.83 | 0.97 |
| MRPL13   | 0.70  | 0.60  | 0.58  | 0.83 | 0.85 |
| IER3IP1  | 0.72  | 0.67  | 0.60  | 0.83 | 0.93 |
| GLTSCR2  | 1.91  | 1.83  | 1.58  | 0.83 | 0.96 |
| UBALD2   | 0.69  | 0.56  | 0.57  | 0.83 | 0.80 |
| TMEM33   | 0.71  | 0.61  | 0.59  | 0.83 | 0.86 |
| PGK1     | 3.05  | 2.29  | 2.53  | 0.83 | 0.75 |
| ELL2     | 1.64  | 1.30  | 1.36  | 0.83 | 0.79 |
| G3BP1    | 0.64  | 0.48  | 0.53  | 0.83 | 0.75 |
| AAED1    | 0.97  | 0.88  | 0.80  | 0.83 | 0.91 |
| GNAI3    | 0.95  | 0.84  | 0.79  | 0.83 | 0.88 |
| ISCA1    | 0.63  | 0.53  | 0.52  | 0.83 | 0.85 |
| PLXDC2   | 1.32  | 1.15  | 1.09  | 0.83 | 0.88 |
| SNRPC    | 1.01  | 0.87  | 0.83  | 0.83 | 0.86 |
| PA2G4    | 0.89  | 0.80  | 0.74  | 0.83 | 0.89 |
| SUPT4H1  | 1.31  | 1.08  | 1.08  | 0.83 | 0.83 |
| TRAPPC3  | 0.87  | 0.89  | 0.72  | 0.82 | 1.02 |
| CANX     | 2.09  | 1.99  | 1.72  | 0.82 | 0.95 |
| MRPL57   | 1.37  | 1.26  | 1.13  | 0.82 | 0.92 |
| S100A11  | 36.22 | 34.24 | 29.82 | 0.82 | 0.95 |
| HAVCR2   | 0.98  | 0.97  | 0.81  | 0.82 | 0.99 |
| C11orf73 | 0.72  | 0.59  | 0.59  | 0.82 | 0.82 |
| TRA2B    | 0.96  | 0.75  | 0.79  | 0.82 | 0.78 |
| ZBTB80S  | 0.90  | 0.83  | 0.74  | 0.82 | 0.93 |
| HSPA8    | 4.02  | 3.53  | 3.30  | 0.82 | 0.88 |
| COX7A2   | 7.18  | 5.83  | 5.89  | 0.82 | 0.81 |
| FNDC3B   | 0.97  | 0.91  | 0.80  | 0.82 | 0.94 |
| RAP1B    | 0.85  | 0.71  | 0.70  | 0.82 | 0.84 |
| SUGT1    | 0.62  | 0.49  | 0.51  | 0.82 | 0.79 |
| MAF1     | 0.89  | 0.93  | 0.73  | 0.82 | 1.04 |
| ECHDC1   | 0.64  | 0.52  | 0.53  | 0.82 | 0.81 |
| FAM50A   | 1.04  | 1.06  | 0.85  | 0.82 | 1.01 |
| SIVA1    | 0.97  | 0.94  | 0.79  | 0.82 | 0.97 |
| GLRX3    | 0.78  | 0.70  | 0.64  | 0.82 | 0.90 |
| MTPN     | 1.35  | 1.15  | 1.11  | 0.82 | 0.85 |
| DDIT4    | 1.11  | 0.54  | 0.91  | 0.82 | 0.49 |
| MINOS1   | 3.30  | 2.81  | 2.70  | 0.82 | 0.85 |
| EIF4H    | 0.73  | 0.63  | 0.60  | 0.82 | 0.86 |
| METAP2   | 0.72  | 0.56  | 0.59  | 0.82 | 0.78 |



|          |       |       |       |      |      |
|----------|-------|-------|-------|------|------|
| SRRM1    | 1.36  | 1.14  | 1.11  | 0.82 | 0.84 |
| PSMB1    | 2.67  | 2.13  | 2.18  | 0.82 | 0.80 |
| UBE2D2   | 1.79  | 1.63  | 1.46  | 0.82 | 0.91 |
| EEF1D    | 6.84  | 6.10  | 5.58  | 0.82 | 0.89 |
| PRR13    | 2.49  | 2.35  | 2.03  | 0.82 | 0.94 |
| RBM17    | 0.81  | 0.68  | 0.66  | 0.82 | 0.83 |
| ADPGK    | 0.76  | 0.68  | 0.62  | 0.82 | 0.89 |
| KIF5B    | 1.52  | 1.30  | 1.24  | 0.81 | 0.85 |
| FUS      | 1.27  | 1.31  | 1.03  | 0.81 | 1.04 |
| TXN2     | 0.64  | 0.64  | 0.52  | 0.81 | 1.00 |
| SNX17    | 0.76  | 0.78  | 0.61  | 0.81 | 1.03 |
| NDUFB11  | 2.41  | 1.96  | 1.96  | 0.81 | 0.81 |
| ARFGAP3  | 0.70  | 0.54  | 0.57  | 0.81 | 0.77 |
| STX12    | 0.69  | 0.51  | 0.56  | 0.81 | 0.74 |
| LEPROTL1 | 1.22  | 0.95  | 0.99  | 0.81 | 0.77 |
| HNRNPK   | 2.58  | 1.95  | 2.10  | 0.81 | 0.76 |
| ZNF706   | 4.64  | 4.26  | 3.77  | 0.81 | 0.92 |
| LAMTOR4  | 3.29  | 2.98  | 2.67  | 0.81 | 0.90 |
| KLF9     | 0.71  | 0.42  | 0.58  | 0.81 | 0.59 |
| DDX3X    | 1.68  | 1.34  | 1.36  | 0.81 | 0.80 |
| CD163    | 5.20  | 3.26  | 4.22  | 0.81 | 0.63 |
| NDUFAB1  | 2.20  | 1.81  | 1.79  | 0.81 | 0.82 |
| SEC62    | 2.38  | 1.72  | 1.93  | 0.81 | 0.72 |
| UBE2K    | 0.86  | 0.75  | 0.70  | 0.81 | 0.86 |
| TOMM40   | 0.86  | 1.01  | 0.70  | 0.81 | 1.17 |
| RPL18A   | 32.01 | 26.05 | 25.93 | 0.81 | 0.81 |
| BAZ1A    | 1.08  | 0.88  | 0.88  | 0.81 | 0.81 |
| NDUFB8   | 2.11  | 1.92  | 1.70  | 0.81 | 0.91 |
| CCT8     | 1.00  | 0.78  | 0.81  | 0.81 | 0.78 |
| DNAJC8   | 0.94  | 0.68  | 0.76  | 0.81 | 0.72 |
| TPI1     | 4.86  | 3.95  | 3.92  | 0.81 | 0.81 |
| FCGR3A   | 3.61  | 2.81  | 2.91  | 0.81 | 0.78 |
| KLF4     | 4.16  | 3.86  | 3.36  | 0.81 | 0.93 |
| NUCB1    | 0.90  | 1.16  | 0.72  | 0.81 | 1.29 |
| CHCHD2   | 8.36  | 7.48  | 6.74  | 0.81 | 0.89 |
| MAPRE1   | 0.98  | 0.78  | 0.79  | 0.81 | 0.80 |
| LMAN2    | 1.40  | 1.40  | 1.13  | 0.81 | 1.00 |
| GCHFR    | 6.65  | 8.09  | 5.35  | 0.81 | 1.22 |
| LAMTOR3  | 0.68  | 0.53  | 0.55  | 0.81 | 0.78 |
| MRPL12   | 0.81  | 0.81  | 0.65  | 0.80 | 1.00 |
| RPL39    | 33.59 | 22.31 | 27.02 | 0.80 | 0.66 |
| CHCHD10  | 3.59  | 3.86  | 2.89  | 0.80 | 1.08 |

|          |       |       |       |      |      |
|----------|-------|-------|-------|------|------|
| KCNAB2   | 0.71  | 0.68  | 0.57  | 0.80 | 0.96 |
| MRPS12   | 0.74  | 0.72  | 0.59  | 0.80 | 0.98 |
| ECHS1    | 0.82  | 0.69  | 0.66  | 0.80 | 0.84 |
| C14orf2  | 4.26  | 3.07  | 3.42  | 0.80 | 0.72 |
| EVI2B    | 1.88  | 1.18  | 1.51  | 0.80 | 0.63 |
| DUT      | 0.86  | 0.74  | 0.69  | 0.80 | 0.87 |
| RBM25    | 0.92  | 0.75  | 0.74  | 0.80 | 0.81 |
| CLTB     | 1.07  | 1.00  | 0.86  | 0.80 | 0.93 |
| HSD17B12 | 0.71  | 0.57  | 0.57  | 0.80 | 0.79 |
| KDEL2    | 2.25  | 2.49  | 1.81  | 0.80 | 1.10 |
| COX8A    | 5.76  | 5.42  | 4.62  | 0.80 | 0.94 |
| MZT2B    | 1.33  | 1.42  | 1.07  | 0.80 | 1.07 |
| THEMIS2  | 0.82  | 0.79  | 0.66  | 0.80 | 0.96 |
| DECR1    | 0.87  | 0.78  | 0.70  | 0.80 | 0.89 |
| HSP90AB1 | 4.59  | 3.35  | 3.68  | 0.80 | 0.73 |
| CORO1B   | 0.75  | 0.81  | 0.60  | 0.80 | 1.07 |
| RNF213   | 0.72  | 0.72  | 0.57  | 0.80 | 1.01 |
| TUBB     | 3.48  | 3.08  | 2.78  | 0.80 | 0.89 |
| SLC7A7   | 1.94  | 1.97  | 1.55  | 0.80 | 1.01 |
| COX7A2L  | 1.81  | 1.60  | 1.45  | 0.80 | 0.88 |
| LRP1     | 0.80  | 0.76  | 0.64  | 0.80 | 0.95 |
| CKS2     | 1.03  | 0.71  | 0.83  | 0.80 | 0.68 |
| CCNL1    | 1.29  | 1.14  | 1.03  | 0.80 | 0.89 |
| FKBP1A   | 4.87  | 4.56  | 3.89  | 0.80 | 0.94 |
| NEDD8    | 3.40  | 3.17  | 2.71  | 0.80 | 0.93 |
| CCDC124  | 0.63  | 0.57  | 0.50  | 0.80 | 0.91 |
| IL1RN    | 1.74  | 1.78  | 1.39  | 0.80 | 1.02 |
| IFI6     | 4.65  | 4.10  | 3.71  | 0.80 | 0.88 |
| TMEM261  | 0.66  | 0.65  | 0.53  | 0.80 | 0.99 |
| TWF2     | 0.84  | 0.80  | 0.67  | 0.80 | 0.95 |
| TRAM1    | 1.44  | 1.30  | 1.15  | 0.80 | 0.90 |
| MRPS18C  | 0.73  | 0.60  | 0.58  | 0.80 | 0.82 |
| CWC15    | 0.83  | 0.72  | 0.66  | 0.80 | 0.87 |
| RHEB     | 3.55  | 3.13  | 2.83  | 0.80 | 0.88 |
| IFNGR2   | 1.96  | 1.39  | 1.56  | 0.80 | 0.71 |
| DYNLRB1  | 1.81  | 1.71  | 1.44  | 0.80 | 0.94 |
| COX5B    | 5.31  | 4.38  | 4.22  | 0.80 | 0.83 |
| ZC3H15   | 1.22  | 1.10  | 0.97  | 0.80 | 0.90 |
| TUBA1C   | 1.97  | 1.69  | 1.57  | 0.79 | 0.86 |
| YIF1A    | 0.79  | 0.73  | 0.63  | 0.79 | 0.92 |
| DUSP1    | 13.46 | 10.43 | 10.69 | 0.79 | 0.78 |
| PAG1     | 0.75  | 0.55  | 0.60  | 0.79 | 0.73 |

|          |       |       |       |      |      |
|----------|-------|-------|-------|------|------|
| RPL23A   | 20.75 | 16.93 | 16.47 | 0.79 | 0.82 |
| EIF1     | 23.63 | 20.90 | 18.76 | 0.79 | 0.88 |
| BZW1     | 1.32  | 0.87  | 1.04  | 0.79 | 0.66 |
| ERP44    | 1.06  | 0.91  | 0.84  | 0.79 | 0.86 |
| FUOM     | 1.39  | 1.30  | 1.10  | 0.79 | 0.93 |
| CHMP2B   | 0.92  | 0.66  | 0.73  | 0.79 | 0.71 |
| MTHFD2   | 0.89  | 0.86  | 0.70  | 0.79 | 0.97 |
| SLC16A6  | 0.69  | 0.36  | 0.55  | 0.79 | 0.52 |
| MAGOH    | 0.79  | 0.61  | 0.63  | 0.79 | 0.76 |
| ATP5B    | 2.55  | 2.11  | 2.02  | 0.79 | 0.83 |
| APRT     | 2.85  | 2.54  | 2.26  | 0.79 | 0.89 |
| HNRNPC   | 2.65  | 1.96  | 2.09  | 0.79 | 0.74 |
| RPL28    | 36.45 | 30.19 | 28.80 | 0.79 | 0.83 |
| PSMD4    | 0.75  | 0.67  | 0.60  | 0.79 | 0.88 |
| M6PR     | 2.13  | 1.98  | 1.68  | 0.79 | 0.93 |
| RPL27    | 19.00 | 14.60 | 15.01 | 0.79 | 0.77 |
| RPS15    | 26.26 | 20.30 | 20.73 | 0.79 | 0.77 |
| MRPS21   | 1.22  | 0.91  | 0.96  | 0.79 | 0.75 |
| SRSF11   | 0.90  | 0.67  | 0.71  | 0.79 | 0.74 |
| MDH2     | 1.36  | 1.41  | 1.08  | 0.79 | 1.03 |
| PRRC2C   | 1.07  | 0.94  | 0.85  | 0.79 | 0.88 |
| CUTA     | 1.94  | 1.50  | 1.53  | 0.79 | 0.78 |
| RPS10    | 4.07  | 3.45  | 3.21  | 0.79 | 0.85 |
| SLC25A24 | 0.70  | 0.55  | 0.55  | 0.79 | 0.78 |
| C7orf50  | 1.04  | 1.29  | 0.82  | 0.79 | 1.24 |
| RPS25    | 21.08 | 15.61 | 16.59 | 0.79 | 0.74 |
| FBXW5    | 0.67  | 0.72  | 0.53  | 0.79 | 1.08 |
| HMGB1    | 4.59  | 3.43  | 3.61  | 0.79 | 0.75 |
| SMCO4    | 1.27  | 1.38  | 1.00  | 0.79 | 1.08 |
| AP2S1    | 8.06  | 6.37  | 6.33  | 0.79 | 0.79 |
| ADM      | 0.93  | 0.55  | 0.73  | 0.79 | 0.59 |
| MSR1     | 3.54  | 3.80  | 2.78  | 0.79 | 1.07 |
| YPEL5    | 0.94  | 0.77  | 0.74  | 0.78 | 0.81 |
| KDM6B    | 0.88  | 0.76  | 0.69  | 0.78 | 0.87 |
| DNASE2   | 0.79  | 0.75  | 0.62  | 0.78 | 0.95 |
| DYNLT1   | 1.90  | 1.49  | 1.49  | 0.78 | 0.78 |
| UBE2A    | 1.07  | 0.89  | 0.84  | 0.78 | 0.83 |
| BTF3L4   | 1.02  | 0.75  | 0.80  | 0.78 | 0.74 |
| XRCC6    | 0.95  | 0.71  | 0.74  | 0.78 | 0.75 |
| POLR2L   | 3.46  | 2.47  | 2.71  | 0.78 | 0.71 |
| MRPS36   | 1.04  | 0.80  | 0.81  | 0.78 | 0.77 |
| LAMTOR2  | 2.35  | 2.19  | 1.84  | 0.78 | 0.93 |

|          |       |       |       |      |      |
|----------|-------|-------|-------|------|------|
| TIMM8B   | 1.81  | 1.59  | 1.42  | 0.78 | 0.88 |
| EIF4E2   | 0.78  | 0.68  | 0.61  | 0.78 | 0.87 |
| NDUFA2   | 1.77  | 1.63  | 1.39  | 0.78 | 0.92 |
| S100A4   | 26.66 | 20.91 | 20.86 | 0.78 | 0.78 |
| RALY     | 0.74  | 0.76  | 0.58  | 0.78 | 1.03 |
| NCF2     | 2.09  | 2.37  | 1.64  | 0.78 | 1.13 |
| PSMD11   | 0.71  | 0.57  | 0.55  | 0.78 | 0.80 |
| EIF1B    | 1.21  | 0.86  | 0.95  | 0.78 | 0.71 |
| HSP90B1  | 4.62  | 3.27  | 3.61  | 0.78 | 0.71 |
| STT3B    | 0.70  | 0.60  | 0.54  | 0.78 | 0.87 |
| SNRPD3   | 1.13  | 0.90  | 0.88  | 0.78 | 0.79 |
| SLC38A2  | 0.96  | 0.69  | 0.75  | 0.78 | 0.71 |
| SUMO1    | 1.74  | 1.45  | 1.36  | 0.78 | 0.84 |
| RAD23B   | 0.87  | 0.76  | 0.68  | 0.78 | 0.87 |
| SF3B2    | 0.66  | 0.53  | 0.51  | 0.78 | 0.80 |
| PSMD7    | 1.38  | 1.10  | 1.08  | 0.78 | 0.80 |
| AZI2     | 0.86  | 0.71  | 0.67  | 0.78 | 0.83 |
| BLOC1S1  | 3.88  | 3.61  | 3.02  | 0.78 | 0.93 |
| SOCS3    | 2.09  | 2.02  | 1.62  | 0.78 | 0.97 |
| CHP1     | 1.04  | 0.95  | 0.81  | 0.78 | 0.91 |
| LSM4     | 1.30  | 1.25  | 1.01  | 0.78 | 0.96 |
| PHB2     | 0.79  | 0.74  | 0.62  | 0.78 | 0.94 |
| RABAC1   | 1.49  | 1.30  | 1.16  | 0.78 | 0.87 |
| SKAP2    | 0.99  | 0.85  | 0.77  | 0.78 | 0.86 |
| PSMC5    | 1.01  | 0.92  | 0.79  | 0.78 | 0.91 |
| PPP1CB   | 1.74  | 1.14  | 1.36  | 0.78 | 0.65 |
| GOLGA4   | 0.71  | 0.64  | 0.55  | 0.78 | 0.90 |
| HSPA9    | 0.96  | 0.76  | 0.75  | 0.78 | 0.80 |
| FOSL2    | 1.58  | 1.11  | 1.23  | 0.78 | 0.70 |
| ANAPC16  | 1.63  | 1.41  | 1.27  | 0.78 | 0.87 |
| XRCC5    | 0.94  | 0.75  | 0.73  | 0.78 | 0.79 |
| GAPDH    | 18.70 | 16.08 | 14.54 | 0.78 | 0.86 |
| C19orf53 | 2.37  | 2.32  | 1.84  | 0.78 | 0.98 |
| PIN1     | 0.78  | 0.75  | 0.61  | 0.78 | 0.96 |
| TOMM22   | 1.07  | 1.02  | 0.83  | 0.78 | 0.95 |
| RPN1     | 1.25  | 1.07  | 0.97  | 0.78 | 0.85 |
| ABRA1    | 1.77  | 1.86  | 1.38  | 0.78 | 1.05 |
| UFD1L    | 0.69  | 0.65  | 0.53  | 0.78 | 0.94 |
| NDUFA1   | 3.07  | 2.55  | 2.38  | 0.77 | 0.83 |
| SSR2     | 1.77  | 1.64  | 1.37  | 0.77 | 0.93 |
| SSB      | 1.49  | 1.02  | 1.16  | 0.77 | 0.68 |
| EIF3K    | 4.11  | 3.59  | 3.19  | 0.77 | 0.87 |

|          |       |       |       |      |      |
|----------|-------|-------|-------|------|------|
| CCDC109B | 1.18  | 1.18  | 0.91  | 0.77 | 1.01 |
| ORMDL2   | 1.12  | 1.07  | 0.87  | 0.77 | 0.95 |
| SNRPD1   | 1.53  | 1.22  | 1.18  | 0.77 | 0.80 |
| COX14    | 1.53  | 1.47  | 1.19  | 0.77 | 0.96 |
| FGFR1OP2 | 0.81  | 0.71  | 0.63  | 0.77 | 0.88 |
| ATP5I    | 3.20  | 2.60  | 2.48  | 0.77 | 0.81 |
| CHCHD5   | 0.75  | 0.66  | 0.58  | 0.77 | 0.88 |
| YWHAG    | 1.08  | 0.94  | 0.84  | 0.77 | 0.87 |
| POLE4    | 1.59  | 1.38  | 1.23  | 0.77 | 0.87 |
| ENY2     | 2.57  | 2.10  | 1.99  | 0.77 | 0.82 |
| XIST     | 1.16  | 1.19  | 0.89  | 0.77 | 1.03 |
| WBP5     | 0.85  | 0.50  | 0.66  | 0.77 | 0.58 |
| GPX4     | 13.29 | 12.32 | 10.27 | 0.77 | 0.93 |
| TCEB1    | 3.11  | 2.37  | 2.40  | 0.77 | 0.76 |
| RPL8     | 25.80 | 21.91 | 19.89 | 0.77 | 0.85 |
| EIF5B    | 1.05  | 0.98  | 0.81  | 0.77 | 0.93 |
| MKKS     | 0.83  | 0.81  | 0.64  | 0.77 | 0.98 |
| PSMD14   | 0.77  | 0.66  | 0.59  | 0.77 | 0.85 |
| PDCD10   | 0.81  | 0.56  | 0.62  | 0.77 | 0.70 |
| TNFRSF1A | 0.91  | 0.66  | 0.70  | 0.77 | 0.72 |
| COX7B    | 5.17  | 3.94  | 3.98  | 0.77 | 0.76 |
| SF1      | 0.80  | 0.61  | 0.62  | 0.77 | 0.76 |
| CAT      | 0.89  | 0.80  | 0.68  | 0.77 | 0.90 |
| UBL5     | 4.59  | 3.73  | 3.53  | 0.77 | 0.81 |
| MRPL20   | 1.97  | 1.77  | 1.51  | 0.77 | 0.90 |
| UQCRFS1  | 1.74  | 1.35  | 1.34  | 0.77 | 0.78 |
| CHURC1   | 0.74  | 0.50  | 0.57  | 0.77 | 0.67 |
| LSM5     | 1.24  | 1.24  | 0.95  | 0.77 | 1.00 |
| PCMT1    | 0.85  | 0.69  | 0.65  | 0.77 | 0.81 |
| TIMM13   | 1.92  | 1.63  | 1.48  | 0.77 | 0.85 |
| RPS5     | 16.76 | 14.04 | 12.85 | 0.77 | 0.84 |
| UXT      | 1.92  | 1.53  | 1.47  | 0.77 | 0.80 |
| SSNA1    | 0.91  | 0.98  | 0.69  | 0.77 | 1.08 |
| ITGB2    | 2.97  | 2.27  | 2.28  | 0.77 | 0.76 |
| SRSF2    | 1.98  | 1.80  | 1.52  | 0.77 | 0.91 |
| RPS3     | 19.00 | 17.46 | 14.55 | 0.77 | 0.92 |
| MRPL18   | 1.07  | 0.82  | 0.82  | 0.77 | 0.77 |
| NDUFB2   | 5.39  | 4.81  | 4.13  | 0.77 | 0.89 |
| P4HB     | 2.37  | 2.64  | 1.81  | 0.77 | 1.11 |
| FCGRT    | 5.91  | 5.91  | 4.52  | 0.77 | 1.00 |
| RPLP1    | 69.49 | 57.57 | 53.17 | 0.77 | 0.83 |
| RNPEP    | 0.69  | 0.54  | 0.53  | 0.77 | 0.78 |

|            |       |       |       |      |      |
|------------|-------|-------|-------|------|------|
| TCEAL4     | 0.85  | 0.60  | 0.65  | 0.76 | 0.71 |
| OCIAD1     | 1.02  | 0.86  | 0.78  | 0.76 | 0.84 |
| HN1        | 1.75  | 1.69  | 1.34  | 0.76 | 0.97 |
| PSMA5      | 1.11  | 0.83  | 0.85  | 0.76 | 0.75 |
| SARAF      | 4.38  | 3.42  | 3.35  | 0.76 | 0.78 |
| WTAP       | 1.36  | 0.95  | 1.04  | 0.76 | 0.70 |
| TIMP1      | 10.47 | 6.90  | 7.99  | 0.76 | 0.66 |
| ZNF207     | 0.96  | 0.71  | 0.73  | 0.76 | 0.74 |
| SNX3       | 5.97  | 5.43  | 4.55  | 0.76 | 0.91 |
| LRRFIP1    | 4.23  | 3.22  | 3.22  | 0.76 | 0.76 |
| RPS27L     | 7.28  | 5.76  | 5.54  | 0.76 | 0.79 |
| MRPL27     | 0.74  | 0.74  | 0.56  | 0.76 | 1.01 |
| RNF181     | 1.69  | 1.38  | 1.29  | 0.76 | 0.82 |
| C1D        | 0.75  | 0.58  | 0.57  | 0.76 | 0.77 |
| PAPOLA     | 1.76  | 1.37  | 1.34  | 0.76 | 0.78 |
| NARS       | 0.73  | 0.57  | 0.55  | 0.76 | 0.78 |
| VMP1       | 1.08  | 0.82  | 0.82  | 0.76 | 0.76 |
| OS9        | 0.72  | 0.59  | 0.54  | 0.76 | 0.82 |
| SNU13      | 2.01  | 1.61  | 1.53  | 0.76 | 0.80 |
| SFT2D1     | 2.42  | 1.80  | 1.83  | 0.76 | 0.75 |
| CHMP1B     | 2.11  | 1.72  | 1.60  | 0.76 | 0.81 |
| MMADHC     | 0.73  | 0.56  | 0.55  | 0.76 | 0.76 |
| JTB        | 2.75  | 2.77  | 2.09  | 0.76 | 1.00 |
| C8orf59    | 1.30  | 1.07  | 0.98  | 0.76 | 0.82 |
| SLTM       | 0.73  | 0.55  | 0.56  | 0.76 | 0.75 |
| HNRNPF     | 1.47  | 1.12  | 1.11  | 0.76 | 0.76 |
| RPSA       | 11.72 | 10.19 | 8.88  | 0.76 | 0.87 |
| TBCB       | 1.03  | 0.87  | 0.78  | 0.76 | 0.85 |
| MRPS34     | 0.81  | 0.74  | 0.62  | 0.76 | 0.91 |
| PDCD5      | 0.93  | 0.88  | 0.70  | 0.76 | 0.95 |
| PSME2      | 2.05  | 1.77  | 1.55  | 0.76 | 0.86 |
| ETFA       | 0.94  | 0.71  | 0.71  | 0.76 | 0.75 |
| CISD2      | 1.37  | 1.34  | 1.03  | 0.76 | 0.98 |
| GADD45GIP1 | 2.15  | 1.58  | 1.63  | 0.76 | 0.74 |
| CYBA       | 20.59 | 17.92 | 15.55 | 0.76 | 0.87 |
| UBE2L3     | 1.94  | 1.54  | 1.47  | 0.76 | 0.79 |
| CALR       | 5.67  | 5.11  | 4.28  | 0.76 | 0.90 |
| EMC10      | 0.93  | 0.74  | 0.70  | 0.75 | 0.80 |
| SSR1       | 1.33  | 1.13  | 1.00  | 0.75 | 0.85 |
| RPL35      | 22.45 | 15.73 | 16.93 | 0.75 | 0.70 |
| AP2M1      | 2.23  | 2.20  | 1.68  | 0.75 | 0.98 |
| PSMA1      | 1.92  | 1.48  | 1.45  | 0.75 | 0.77 |

|          |       |       |       |      |      |
|----------|-------|-------|-------|------|------|
| FLNA     | 2.16  | 2.02  | 1.63  | 0.75 | 0.93 |
| GTF2A2   | 1.36  | 1.32  | 1.03  | 0.75 | 0.97 |
| ANXA11   | 2.22  | 1.97  | 1.67  | 0.75 | 0.88 |
| HNRNPA1  | 4.98  | 4.29  | 3.75  | 0.75 | 0.86 |
| NDUFS6   | 2.88  | 2.34  | 2.17  | 0.75 | 0.81 |
| BLVRB    | 3.72  | 3.29  | 2.80  | 0.75 | 0.88 |
| HNRNPH3  | 0.70  | 0.44  | 0.52  | 0.75 | 0.63 |
| HADHA    | 0.86  | 0.74  | 0.65  | 0.75 | 0.86 |
| GRN      | 10.76 | 10.45 | 8.06  | 0.75 | 0.97 |
| LSM6     | 1.06  | 1.00  | 0.80  | 0.75 | 0.94 |
| LSM10    | 0.84  | 0.92  | 0.63  | 0.75 | 1.09 |
| USP16    | 0.84  | 0.68  | 0.63  | 0.75 | 0.81 |
| SPCS2    | 2.10  | 1.52  | 1.57  | 0.75 | 0.72 |
| C11orf58 | 1.80  | 1.35  | 1.35  | 0.75 | 0.75 |
| ZFAND6   | 1.18  | 0.82  | 0.88  | 0.75 | 0.69 |
| KRTCAP2  | 1.11  | 0.98  | 0.83  | 0.75 | 0.89 |
| MYEOV2   | 2.13  | 1.65  | 1.59  | 0.75 | 0.78 |
| PMP22    | 2.16  | 1.61  | 1.61  | 0.75 | 0.75 |
| MRPL33   | 1.26  | 0.90  | 0.94  | 0.75 | 0.71 |
| COX17    | 2.46  | 1.86  | 1.83  | 0.75 | 0.76 |
| C6orf62  | 1.28  | 0.99  | 0.96  | 0.75 | 0.78 |
| CCT3     | 0.74  | 0.60  | 0.55  | 0.75 | 0.81 |
| DDX46    | 0.88  | 0.76  | 0.65  | 0.75 | 0.87 |
| MAPKAPK3 | 0.76  | 0.79  | 0.57  | 0.75 | 1.04 |
| RPL36AL  | 7.74  | 6.10  | 5.77  | 0.75 | 0.79 |
| NDUFC1   | 1.06  | 0.85  | 0.79  | 0.74 | 0.80 |
| HLA-E    | 4.75  | 4.46  | 3.53  | 0.74 | 0.94 |
| PNRC2    | 0.70  | 0.46  | 0.52  | 0.74 | 0.65 |
| LAMTOR1  | 2.68  | 2.75  | 1.99  | 0.74 | 1.03 |
| ATP6V1F  | 10.92 | 10.66 | 8.12  | 0.74 | 0.98 |
| FAM133B  | 0.72  | 0.60  | 0.53  | 0.74 | 0.83 |
| CIRBP    | 2.35  | 2.28  | 1.75  | 0.74 | 0.97 |
| PET100   | 0.91  | 0.61  | 0.68  | 0.74 | 0.66 |
| CDC42SE1 | 0.80  | 0.71  | 0.60  | 0.74 | 0.89 |
| ENSA     | 1.32  | 1.24  | 0.98  | 0.74 | 0.94 |
| RPS14    | 34.12 | 27.45 | 25.32 | 0.74 | 0.80 |
| CIB1     | 2.34  | 2.14  | 1.74  | 0.74 | 0.91 |
| CITED2   | 1.82  | 1.42  | 1.35  | 0.74 | 0.78 |
| SRSF7    | 1.19  | 0.84  | 0.88  | 0.74 | 0.71 |
| TGIF1    | 1.72  | 1.26  | 1.28  | 0.74 | 0.73 |
| CCL7     | 1.27  | 0.75  | 0.94  | 0.74 | 0.59 |
| MYL12A   | 7.29  | 4.54  | 5.41  | 0.74 | 0.62 |

|               |       |       |       |      |      |
|---------------|-------|-------|-------|------|------|
| APEX1         | 0.95  | 0.83  | 0.70  | 0.74 | 0.87 |
| TMED2         | 2.04  | 2.03  | 1.51  | 0.74 | 0.99 |
| H3F3B         | 16.97 | 12.93 | 12.57 | 0.74 | 0.76 |
| MLEC          | 0.81  | 0.77  | 0.60  | 0.74 | 0.95 |
| RPL35A        | 18.74 | 13.19 | 13.87 | 0.74 | 0.70 |
| ATP2B1        | 1.50  | 1.07  | 1.11  | 0.74 | 0.71 |
| ATP5G3        | 6.10  | 5.05  | 4.51  | 0.74 | 0.83 |
| NDUFS5        | 4.46  | 3.41  | 3.30  | 0.74 | 0.76 |
| HNRNPA2B1     | 3.99  | 2.68  | 2.94  | 0.74 | 0.67 |
| RANBP1        | 1.74  | 1.50  | 1.28  | 0.74 | 0.86 |
| C1QBP         | 1.48  | 1.12  | 1.09  | 0.74 | 0.75 |
| CYTH1         | 0.73  | 0.40  | 0.54  | 0.74 | 0.54 |
| SNX10         | 3.16  | 2.54  | 2.33  | 0.74 | 0.80 |
| PTP4A1        | 0.94  | 0.67  | 0.69  | 0.74 | 0.71 |
| CNPY2         | 0.85  | 0.78  | 0.62  | 0.74 | 0.92 |
| DDX21         | 1.69  | 1.38  | 1.25  | 0.74 | 0.81 |
| TMCO1         | 0.82  | 0.61  | 0.60  | 0.74 | 0.75 |
| SLC25A6       | 7.32  | 6.31  | 5.38  | 0.74 | 0.86 |
| RABGGTB       | 0.77  | 0.72  | 0.57  | 0.74 | 0.93 |
| ANKRD28       | 1.28  | 0.86  | 0.94  | 0.74 | 0.67 |
| UQCR11        | 5.12  | 3.99  | 3.76  | 0.73 | 0.78 |
| COX6B1        | 6.05  | 4.71  | 4.44  | 0.73 | 0.78 |
| TMEM30A       | 0.82  | 0.58  | 0.60  | 0.73 | 0.70 |
| MRPS15        | 1.22  | 1.19  | 0.89  | 0.73 | 0.98 |
| IVNS1ABP      | 0.93  | 0.54  | 0.68  | 0.73 | 0.58 |
| PIIB          | 3.07  | 2.75  | 2.24  | 0.73 | 0.90 |
| S100A6        | 64.24 | 49.06 | 46.89 | 0.73 | 0.76 |
| PTPN6         | 1.07  | 0.78  | 0.78  | 0.73 | 0.73 |
| RAD23A        | 1.55  | 1.48  | 1.13  | 0.73 | 0.96 |
| GRB2          | 2.39  | 1.87  | 1.74  | 0.73 | 0.78 |
| SUB1          | 3.98  | 2.87  | 2.91  | 0.73 | 0.72 |
| REEP3         | 0.93  | 0.77  | 0.68  | 0.73 | 0.83 |
| RP11-1143G9.4 | 3.19  | 3.47  | 2.33  | 0.73 | 1.09 |
| LINC00152     | 0.69  | 0.57  | 0.50  | 0.73 | 0.83 |
| ANKRD12       | 1.04  | 0.74  | 0.76  | 0.73 | 0.71 |
| C4orf48       | 2.67  | 1.88  | 1.94  | 0.73 | 0.70 |
| MCL1          | 7.20  | 5.19  | 5.23  | 0.73 | 0.72 |
| RPL18         | 16.69 | 13.19 | 12.12 | 0.73 | 0.79 |
| FAM173A       | 0.71  | 0.76  | 0.51  | 0.73 | 1.08 |
| LPXN          | 0.91  | 0.69  | 0.66  | 0.73 | 0.76 |
| NDUFA5        | 0.80  | 0.56  | 0.58  | 0.73 | 0.71 |
| TIMM17A       | 0.96  | 0.68  | 0.70  | 0.72 | 0.70 |



|         |       |       |       |      |      |
|---------|-------|-------|-------|------|------|
| SF3B1   | 0.97  | 0.57  | 0.70  | 0.72 | 0.59 |
| PSMC1   | 0.93  | 0.75  | 0.67  | 0.72 | 0.81 |
| ILF2    | 0.83  | 0.52  | 0.60  | 0.72 | 0.62 |
| ANAPC11 | 2.39  | 2.15  | 1.73  | 0.72 | 0.90 |
| OSTC    | 1.79  | 1.58  | 1.30  | 0.72 | 0.88 |
| RPL37A  | 21.26 | 15.29 | 15.37 | 0.72 | 0.72 |
| PCNP    | 0.93  | 0.67  | 0.67  | 0.72 | 0.72 |
| GSTP1   | 6.63  | 5.83  | 4.79  | 0.72 | 0.88 |
| EIF2S2  | 1.64  | 1.19  | 1.19  | 0.72 | 0.72 |
| DDX5    | 5.08  | 3.58  | 3.66  | 0.72 | 0.71 |
| ETFB    | 1.14  | 0.98  | 0.82  | 0.72 | 0.86 |
| IRAK3   | 0.92  | 0.61  | 0.66  | 0.72 | 0.67 |
| PYURF   | 1.38  | 1.30  | 1.00  | 0.72 | 0.94 |
| UFM1    | 1.09  | 0.77  | 0.78  | 0.72 | 0.71 |
| DDT     | 1.67  | 1.30  | 1.20  | 0.72 | 0.78 |
| STOM    | 1.20  | 0.81  | 0.86  | 0.72 | 0.68 |
| ARHGDI1 | 1.56  | 1.50  | 1.12  | 0.72 | 0.96 |
| NAA38   | 1.06  | 0.81  | 0.76  | 0.72 | 0.76 |
| PTPN12  | 0.77  | 0.55  | 0.55  | 0.72 | 0.71 |
| TAX1BP1 | 1.82  | 1.34  | 1.31  | 0.72 | 0.74 |
| NDUFA13 | 1.58  | 1.09  | 1.13  | 0.72 | 0.69 |
| MRPL52  | 1.40  | 1.00  | 1.00  | 0.72 | 0.72 |
| CCT4    | 1.14  | 0.79  | 0.82  | 0.72 | 0.70 |
| MLF2    | 0.87  | 0.75  | 0.62  | 0.72 | 0.87 |
| CDC26   | 0.81  | 0.59  | 0.58  | 0.72 | 0.72 |
| SEC61B  | 5.80  | 4.83  | 4.15  | 0.72 | 0.83 |
| PSMB2   | 1.35  | 1.02  | 0.97  | 0.72 | 0.76 |
| SON     | 1.53  | 1.17  | 1.09  | 0.71 | 0.76 |
| GLIPR2  | 2.97  | 3.32  | 2.12  | 0.71 | 1.12 |
| TMEM165 | 1.08  | 1.05  | 0.77  | 0.71 | 0.97 |
| GPBP1   | 0.81  | 0.56  | 0.58  | 0.71 | 0.69 |
| NDUFA12 | 1.46  | 1.02  | 1.04  | 0.71 | 0.70 |
| PSMB3   | 2.70  | 1.89  | 1.93  | 0.71 | 0.70 |
| RMDN3   | 1.02  | 1.01  | 0.73  | 0.71 | 0.99 |
| USMG5   | 4.88  | 3.32  | 3.48  | 0.71 | 0.68 |
| RPL36   | 14.36 | 9.88  | 10.24 | 0.71 | 0.69 |
| RPS18   | 48.36 | 37.09 | 34.46 | 0.71 | 0.77 |
| HMGA1   | 1.62  | 1.40  | 1.16  | 0.71 | 0.87 |
| UQCC2   | 1.19  | 0.90  | 0.85  | 0.71 | 0.76 |
| CD164   | 3.54  | 2.79  | 2.52  | 0.71 | 0.79 |
| STX11   | 1.14  | 0.95  | 0.81  | 0.71 | 0.83 |
| RPLP2   | 38.82 | 27.19 | 27.59 | 0.71 | 0.70 |

|          |       |       |       |      |      |
|----------|-------|-------|-------|------|------|
| CTSC     | 5.03  | 3.77  | 3.57  | 0.71 | 0.75 |
| EIF1AX   | 2.25  | 1.79  | 1.60  | 0.71 | 0.80 |
| CREM     | 2.78  | 2.29  | 1.97  | 0.71 | 0.82 |
| EIF2A    | 0.83  | 0.66  | 0.59  | 0.71 | 0.80 |
| CCT2     | 0.73  | 0.58  | 0.51  | 0.71 | 0.80 |
| ACP1     | 0.95  | 0.79  | 0.68  | 0.71 | 0.83 |
| GLRX     | 4.62  | 4.36  | 3.27  | 0.71 | 0.94 |
| SRP19    | 0.91  | 0.69  | 0.65  | 0.71 | 0.76 |
| HMGB2    | 1.59  | 0.87  | 1.13  | 0.71 | 0.55 |
| RPL38    | 14.27 | 9.93  | 10.09 | 0.71 | 0.70 |
| ATP1B3   | 6.25  | 6.21  | 4.41  | 0.71 | 0.99 |
| RBM8A    | 2.03  | 1.40  | 1.43  | 0.71 | 0.69 |
| TUFM     | 1.29  | 1.25  | 0.91  | 0.71 | 0.97 |
| MRPL11   | 0.72  | 0.73  | 0.51  | 0.71 | 1.02 |
| RANBP2   | 0.80  | 0.66  | 0.57  | 0.71 | 0.82 |
| SPI1     | 3.01  | 2.63  | 2.12  | 0.70 | 0.87 |
| PAIP2    | 1.53  | 1.17  | 1.08  | 0.70 | 0.77 |
| PSMB9    | 1.03  | 0.86  | 0.72  | 0.70 | 0.84 |
| RPL17    | 1.60  | 1.05  | 1.13  | 0.70 | 0.66 |
| RPS2     | 48.26 | 43.85 | 33.92 | 0.70 | 0.91 |
| RPS29    | 18.75 | 14.23 | 13.18 | 0.70 | 0.76 |
| TMED9    | 1.38  | 1.15  | 0.97  | 0.70 | 0.83 |
| HLA-C    | 15.21 | 14.09 | 10.68 | 0.70 | 0.93 |
| SNRPB2   | 1.51  | 0.95  | 1.06  | 0.70 | 0.63 |
| ERGIC1   | 0.79  | 0.72  | 0.55  | 0.70 | 0.92 |
| FCGR2A   | 3.07  | 1.85  | 2.16  | 0.70 | 0.60 |
| RPL31    | 16.24 | 11.33 | 11.39 | 0.70 | 0.70 |
| SNRPG    | 2.97  | 2.05  | 2.08  | 0.70 | 0.69 |
| HSP90AA1 | 12.03 | 5.84  | 8.42  | 0.70 | 0.49 |
| SH2B3    | 0.76  | 0.49  | 0.53  | 0.70 | 0.64 |
| BEX4     | 0.75  | 0.68  | 0.52  | 0.70 | 0.91 |
| GAA      | 0.82  | 0.86  | 0.58  | 0.70 | 1.04 |
| PSME1    | 2.25  | 1.79  | 1.57  | 0.70 | 0.79 |
| MRPL51   | 1.87  | 1.47  | 1.30  | 0.70 | 0.79 |
| CHD1     | 0.74  | 0.78  | 0.51  | 0.70 | 1.05 |
| EIF4G2   | 3.30  | 2.52  | 2.29  | 0.70 | 0.76 |
| PSMB7    | 1.26  | 1.03  | 0.88  | 0.70 | 0.82 |
| BAX      | 2.17  | 1.94  | 1.51  | 0.70 | 0.89 |
| SPCS3    | 2.26  | 1.80  | 1.57  | 0.70 | 0.79 |
| TMA7     | 5.21  | 4.21  | 3.62  | 0.70 | 0.81 |
| TMEM258  | 2.90  | 2.19  | 2.01  | 0.69 | 0.75 |
| CSNK1A1  | 1.66  | 1.19  | 1.15  | 0.69 | 0.72 |

|          |       |       |       |      |      |
|----------|-------|-------|-------|------|------|
| ACSL1    | 2.36  | 1.97  | 1.64  | 0.69 | 0.83 |
| TPRKB    | 0.82  | 0.71  | 0.57  | 0.69 | 0.88 |
| CCRL2    | 0.78  | 0.51  | 0.54  | 0.69 | 0.66 |
| CYB5R3   | 0.81  | 0.63  | 0.56  | 0.69 | 0.78 |
| CLIC1    | 7.16  | 5.80  | 4.97  | 0.69 | 0.81 |
| PFN1     | 21.19 | 19.00 | 14.66 | 0.69 | 0.90 |
| SF3B5    | 2.56  | 1.98  | 1.77  | 0.69 | 0.77 |
| BNIP3L   | 2.25  | 1.24  | 1.56  | 0.69 | 0.55 |
| SRSF9    | 1.46  | 1.36  | 1.01  | 0.69 | 0.93 |
| NR4A3    | 1.13  | 0.87  | 0.78  | 0.69 | 0.77 |
| ARL4A    | 2.71  | 2.27  | 1.87  | 0.69 | 0.84 |
| PRELID3B | 0.74  | 0.49  | 0.51  | 0.69 | 0.66 |
| NFE2L2   | 1.71  | 1.01  | 1.18  | 0.69 | 0.59 |
| TMEM123  | 2.11  | 1.34  | 1.46  | 0.69 | 0.63 |
| SQSTM1   | 2.56  | 2.00  | 1.76  | 0.69 | 0.78 |
| RPS19BP1 | 1.85  | 1.52  | 1.27  | 0.69 | 0.82 |
| SRP9     | 1.30  | 1.14  | 0.89  | 0.69 | 0.88 |
| ID2      | 2.56  | 2.52  | 1.76  | 0.69 | 0.99 |
| BTG1     | 11.40 | 7.31  | 7.84  | 0.69 | 0.64 |
| HNRNPU   | 1.57  | 1.07  | 1.08  | 0.69 | 0.68 |
| SNRPF    | 1.59  | 1.13  | 1.09  | 0.69 | 0.71 |
| BUD31    | 1.09  | 0.78  | 0.75  | 0.69 | 0.71 |
| PSMA4    | 2.07  | 1.33  | 1.42  | 0.69 | 0.65 |
| PPA1     | 0.96  | 0.71  | 0.66  | 0.69 | 0.74 |
| PYCARD   | 2.63  | 2.83  | 1.81  | 0.69 | 1.08 |
| GK       | 2.04  | 1.49  | 1.40  | 0.68 | 0.73 |
| TMEM126A | 1.00  | 0.84  | 0.68  | 0.68 | 0.83 |
| IRF8     | 0.94  | 0.72  | 0.64  | 0.68 | 0.77 |
| RTFDC1   | 0.76  | 0.64  | 0.52  | 0.68 | 0.83 |
| PPP1CA   | 2.41  | 2.15  | 1.64  | 0.68 | 0.89 |
| UQCR10   | 3.69  | 2.76  | 2.51  | 0.68 | 0.75 |
| YWHAH    | 2.54  | 2.33  | 1.73  | 0.68 | 0.92 |
| CALM1    | 9.70  | 7.44  | 6.59  | 0.68 | 0.77 |
| SRM      | 0.75  | 0.78  | 0.51  | 0.68 | 1.05 |
| DNAJA1   | 2.12  | 1.29  | 1.44  | 0.68 | 0.61 |
| CCT5     | 1.40  | 1.07  | 0.95  | 0.68 | 0.76 |
| PPP2CA   | 0.92  | 0.60  | 0.62  | 0.68 | 0.66 |
| VIMP     | 1.61  | 1.32  | 1.09  | 0.68 | 0.82 |
| UQCRQ    | 4.63  | 3.46  | 3.13  | 0.68 | 0.75 |
| ETF1     | 1.13  | 0.83  | 0.76  | 0.67 | 0.74 |
| IFI30    | 1.80  | 1.68  | 1.22  | 0.67 | 0.93 |
| RPL37    | 18.42 | 12.22 | 12.41 | 0.67 | 0.66 |

|          |       |       |       |      |      |
|----------|-------|-------|-------|------|------|
| PSMB8    | 1.13  | 1.00  | 0.76  | 0.67 | 0.88 |
| RSL24D1  | 1.36  | 0.88  | 0.91  | 0.67 | 0.65 |
| LMNA     | 5.91  | 3.85  | 3.98  | 0.67 | 0.65 |
| SDC4     | 1.23  | 0.92  | 0.83  | 0.67 | 0.75 |
| SNRPD2   | 3.19  | 2.47  | 2.14  | 0.67 | 0.77 |
| IER2     | 0.94  | 0.55  | 0.63  | 0.67 | 0.58 |
| C20orf24 | 1.99  | 1.79  | 1.34  | 0.67 | 0.90 |
| ALDH2    | 2.44  | 2.60  | 1.64  | 0.67 | 1.07 |
| PFDN2    | 2.10  | 1.37  | 1.41  | 0.67 | 0.65 |
| BRD2     | 1.01  | 0.70  | 0.68  | 0.67 | 0.69 |
| ABCG1    | 0.84  | 0.66  | 0.56  | 0.67 | 0.78 |
| PTGES3   | 2.14  | 1.53  | 1.44  | 0.67 | 0.71 |
| PGD      | 1.23  | 1.17  | 0.82  | 0.67 | 0.95 |
| PDIA4    | 1.26  | 0.76  | 0.84  | 0.67 | 0.60 |
| HNRNPAO  | 1.65  | 1.21  | 1.10  | 0.67 | 0.74 |
| JOSD2    | 0.95  | 0.81  | 0.63  | 0.67 | 0.85 |
| UGP2     | 1.51  | 0.95  | 1.00  | 0.67 | 0.63 |
| MTCH1    | 1.09  | 0.93  | 0.73  | 0.67 | 0.86 |
| ACSL3    | 1.11  | 0.87  | 0.74  | 0.67 | 0.78 |
| PPP1R2   | 1.03  | 0.74  | 0.69  | 0.67 | 0.72 |
| PPP1R15A | 2.20  | 1.49  | 1.47  | 0.67 | 0.67 |
| ATP6V0D1 | 2.60  | 2.01  | 1.73  | 0.67 | 0.77 |
| MNDA     | 2.02  | 1.40  | 1.34  | 0.67 | 0.69 |
| EIF6     | 1.08  | 0.82  | 0.72  | 0.67 | 0.75 |
| UBE2D3   | 4.73  | 3.47  | 3.15  | 0.66 | 0.73 |
| CKLF     | 1.98  | 1.56  | 1.31  | 0.66 | 0.79 |
| HNRNPH1  | 1.19  | 1.01  | 0.79  | 0.66 | 0.85 |
| RBM39    | 1.91  | 1.28  | 1.27  | 0.66 | 0.67 |
| NUP214   | 0.85  | 0.59  | 0.57  | 0.66 | 0.69 |
| PDXK     | 2.53  | 2.40  | 1.68  | 0.66 | 0.95 |
| NINJ1    | 1.49  | 1.03  | 0.99  | 0.66 | 0.69 |
| RASGEF1B | 1.55  | 1.30  | 1.03  | 0.66 | 0.84 |
| CYC1     | 1.25  | 1.04  | 0.83  | 0.66 | 0.83 |
| ENO1     | 5.43  | 4.39  | 3.60  | 0.66 | 0.81 |
| EMC6     | 0.87  | 0.73  | 0.58  | 0.66 | 0.84 |
| SNRPB    | 1.58  | 1.23  | 1.04  | 0.66 | 0.78 |
| NDUFV2   | 2.65  | 2.01  | 1.75  | 0.66 | 0.76 |
| HNRNPD   | 3.27  | 2.40  | 2.16  | 0.66 | 0.73 |
| AIMP1    | 0.94  | 0.66  | 0.62  | 0.66 | 0.70 |
| RPS19    | 43.97 | 34.19 | 29.00 | 0.66 | 0.78 |
| SURF4    | 0.84  | 0.67  | 0.55  | 0.66 | 0.80 |
| N4BP2L2  | 1.11  | 0.78  | 0.73  | 0.66 | 0.70 |

|           |       |      |      |      |      |
|-----------|-------|------|------|------|------|
| HNRNPM    | 1.14  | 0.78 | 0.75 | 0.66 | 0.69 |
| NDUFA3    | 1.55  | 1.17 | 1.02 | 0.66 | 0.75 |
| ARF6      | 2.06  | 1.58 | 1.35 | 0.66 | 0.77 |
| SAR1A     | 0.99  | 0.65 | 0.65 | 0.66 | 0.65 |
| MMP19     | 3.38  | 2.19 | 2.22 | 0.66 | 0.65 |
| SCAND1    | 1.63  | 1.25 | 1.07 | 0.65 | 0.77 |
| AURKAIP1  | 2.17  | 1.97 | 1.42 | 0.65 | 0.91 |
| RNASEH2C  | 1.04  | 0.86 | 0.68 | 0.65 | 0.83 |
| SMDT1     | 2.23  | 1.88 | 1.45 | 0.65 | 0.84 |
| TMEM167A  | 2.14  | 1.84 | 1.40 | 0.65 | 0.86 |
| FKBP2     | 2.04  | 1.59 | 1.33 | 0.65 | 0.78 |
| ATP5G1    | 1.72  | 1.34 | 1.13 | 0.65 | 0.78 |
| RBMX      | 0.82  | 0.63 | 0.53 | 0.65 | 0.77 |
| STX4      | 1.06  | 0.80 | 0.69 | 0.65 | 0.75 |
| NHP2      | 1.47  | 1.28 | 0.96 | 0.65 | 0.87 |
| PHB       | 1.28  | 1.01 | 0.83 | 0.65 | 0.79 |
| PLAUR     | 8.21  | 5.14 | 5.34 | 0.65 | 0.63 |
| GNB2      | 2.15  | 1.81 | 1.40 | 0.65 | 0.84 |
| GPCPD1    | 1.23  | 1.14 | 0.80 | 0.65 | 0.93 |
| CCT6A     | 1.22  | 0.95 | 0.79 | 0.65 | 0.77 |
| FAM96B    | 2.08  | 1.69 | 1.35 | 0.65 | 0.81 |
| POLR2J    | 1.32  | 1.20 | 0.85 | 0.65 | 0.91 |
| SLIRP     | 2.00  | 1.27 | 1.30 | 0.65 | 0.63 |
| EIF4A3    | 1.24  | 0.69 | 0.80 | 0.65 | 0.56 |
| POLR2I    | 0.88  | 0.66 | 0.57 | 0.65 | 0.75 |
| ASNA1     | 0.79  | 0.74 | 0.51 | 0.65 | 0.93 |
| HMG2      | 3.18  | 2.86 | 2.05 | 0.65 | 0.90 |
| NANS      | 1.16  | 0.91 | 0.75 | 0.64 | 0.79 |
| HSPD1     | 1.91  | 1.14 | 1.23 | 0.64 | 0.60 |
| C1QC      | 8.90  | 6.08 | 5.72 | 0.64 | 0.68 |
| CXCL2     | 11.96 | 7.24 | 7.69 | 0.64 | 0.61 |
| VSIG4     | 6.35  | 3.56 | 4.08 | 0.64 | 0.56 |
| RAB11FIP1 | 0.95  | 0.57 | 0.61 | 0.64 | 0.60 |
| SEC11C    | 1.65  | 1.45 | 1.05 | 0.64 | 0.88 |
| SNF8      | 1.40  | 1.32 | 0.90 | 0.64 | 0.94 |
| H2AFZ     | 4.41  | 3.10 | 2.82 | 0.64 | 0.70 |
| ROMO1     | 1.34  | 0.92 | 0.86 | 0.64 | 0.69 |
| TMEM251   | 1.11  | 1.00 | 0.71 | 0.64 | 0.90 |
| PRELID1   | 2.74  | 2.40 | 1.75 | 0.64 | 0.88 |
| CEBPB     | 12.92 | 8.24 | 8.24 | 0.64 | 0.64 |
| IFITM3    | 2.54  | 1.69 | 1.62 | 0.64 | 0.67 |
| SAT2      | 1.09  | 0.80 | 0.70 | 0.64 | 0.73 |

|          |       |       |       |      |      |
|----------|-------|-------|-------|------|------|
| HSPH1    | 1.27  | 0.45  | 0.81  | 0.64 | 0.35 |
| ATF4     | 1.95  | 1.64  | 1.24  | 0.64 | 0.84 |
| COX6A1   | 4.77  | 3.82  | 3.03  | 0.64 | 0.80 |
| RPS28    | 26.17 | 16.77 | 16.63 | 0.64 | 0.64 |
| RPL41    | 43.40 | 27.52 | 27.54 | 0.63 | 0.63 |
| PLSCR1   | 1.74  | 1.21  | 1.10  | 0.63 | 0.70 |
| HMOX1    | 1.40  | 2.34  | 0.89  | 0.63 | 1.67 |
| SBDS     | 0.92  | 0.59  | 0.58  | 0.63 | 0.64 |
| STRAP    | 1.12  | 0.86  | 0.71  | 0.63 | 0.77 |
| RPLP0    | 15.88 | 12.85 | 10.05 | 0.63 | 0.81 |
| CSTA     | 2.37  | 2.02  | 1.50  | 0.63 | 0.85 |
| TGFB1    | 1.04  | 0.78  | 0.66  | 0.63 | 0.75 |
| GOS2     | 6.14  | 2.80  | 3.87  | 0.63 | 0.46 |
| PSMD8    | 1.85  | 1.43  | 1.16  | 0.63 | 0.78 |
| EIF5     | 2.71  | 1.78  | 1.71  | 0.63 | 0.65 |
| MRPL41   | 1.82  | 1.52  | 1.15  | 0.63 | 0.84 |
| POLR2E   | 1.16  | 0.92  | 0.73  | 0.63 | 0.80 |
| RPL36A   | 3.41  | 1.77  | 2.15  | 0.63 | 0.52 |
| SLC11A1  | 4.04  | 2.99  | 2.55  | 0.63 | 0.74 |
| ORMDL1   | 0.96  | 0.81  | 0.60  | 0.63 | 0.84 |
| SERP1    | 5.81  | 4.22  | 3.64  | 0.63 | 0.73 |
| EIF4E    | 1.35  | 0.81  | 0.85  | 0.63 | 0.60 |
| NME1     | 1.36  | 1.05  | 0.85  | 0.63 | 0.77 |
| PSENEN   | 0.81  | 0.61  | 0.50  | 0.63 | 0.76 |
| UBE2N    | 1.07  | 0.79  | 0.67  | 0.63 | 0.75 |
| PPP4C    | 1.64  | 1.14  | 1.02  | 0.62 | 0.70 |
| C11orf31 | 2.45  | 1.99  | 1.53  | 0.62 | 0.81 |
| HBEGF    | 1.39  | 1.30  | 0.87  | 0.62 | 0.93 |
| NOL7     | 0.83  | 0.61  | 0.52  | 0.62 | 0.73 |
| SRSF3    | 2.49  | 1.65  | 1.55  | 0.62 | 0.66 |
| HCK      | 0.92  | 0.78  | 0.57  | 0.62 | 0.85 |
| UBB      | 8.41  | 6.07  | 5.23  | 0.62 | 0.72 |
| ADRM1    | 1.25  | 0.94  | 0.78  | 0.62 | 0.75 |
| TSPO     | 10.80 | 9.52  | 6.71  | 0.62 | 0.88 |
| RSRP1    | 1.05  | 0.52  | 0.65  | 0.62 | 0.50 |
| MGST1    | 1.39  | 1.22  | 0.86  | 0.62 | 0.88 |
| EIF4EBP1 | 2.12  | 1.73  | 1.31  | 0.62 | 0.81 |
| COPE     | 2.59  | 1.90  | 1.60  | 0.62 | 0.73 |
| PSMA2    | 1.21  | 0.81  | 0.75  | 0.62 | 0.67 |
| PHPT1    | 2.67  | 1.94  | 1.65  | 0.62 | 0.73 |
| SNHG8    | 1.75  | 1.12  | 1.08  | 0.62 | 0.64 |
| RPS27    | 36.51 | 23.31 | 22.52 | 0.62 | 0.64 |

|           |      |      |      |      |      |
|-----------|------|------|------|------|------|
| ISG15     | 3.34 | 3.26 | 2.05 | 0.62 | 0.98 |
| SNTB1     | 0.86 | 0.60 | 0.53 | 0.61 | 0.69 |
| MIDN      | 0.97 | 0.63 | 0.60 | 0.61 | 0.65 |
| PIM3      | 1.35 | 0.93 | 0.83 | 0.61 | 0.69 |
| ATP5J2    | 2.87 | 2.00 | 1.75 | 0.61 | 0.70 |
| PPARG     | 1.09 | 0.78 | 0.66 | 0.61 | 0.71 |
| SERPINA1  | 2.67 | 2.12 | 1.62 | 0.61 | 0.79 |
| ARF4      | 1.38 | 0.82 | 0.84 | 0.61 | 0.60 |
| SEC61G    | 5.66 | 3.60 | 3.43 | 0.61 | 0.64 |
| ALOX5     | 1.33 | 1.01 | 0.80 | 0.61 | 0.76 |
| DNAJB6    | 2.11 | 1.23 | 1.28 | 0.61 | 0.58 |
| GABARAPL1 | 1.20 | 0.91 | 0.72 | 0.60 | 0.76 |
| HSPA5     | 2.88 | 1.52 | 1.73 | 0.60 | 0.53 |
| ALCAM     | 2.04 | 1.33 | 1.23 | 0.60 | 0.65 |
| DPH3      | 1.43 | 0.90 | 0.86 | 0.60 | 0.63 |
| TMED5     | 1.43 | 0.99 | 0.86 | 0.60 | 0.69 |
| C17orf89  | 0.95 | 0.78 | 0.57 | 0.60 | 0.82 |
| MRPL14    | 1.28 | 0.97 | 0.77 | 0.60 | 0.75 |
| HSPE1     | 4.49 | 2.42 | 2.69 | 0.60 | 0.54 |
| ALDOA     | 7.54 | 6.72 | 4.51 | 0.60 | 0.89 |
| PPP1R15B  | 0.94 | 0.60 | 0.56 | 0.60 | 0.63 |
| DNAJC3    | 1.06 | 0.86 | 0.64 | 0.60 | 0.81 |
| ARL6IP1   | 2.46 | 1.44 | 1.47 | 0.60 | 0.59 |
| DNAJB9    | 0.92 | 0.66 | 0.55 | 0.60 | 0.72 |
| PHLDA1    | 4.34 | 2.48 | 2.59 | 0.60 | 0.57 |
| ENG       | 1.00 | 0.80 | 0.60 | 0.60 | 0.80 |
| NUDC      | 0.89 | 0.59 | 0.53 | 0.60 | 0.67 |
| RILPL2    | 2.02 | 1.47 | 1.20 | 0.59 | 0.73 |
| AGPAT2    | 1.24 | 1.21 | 0.73 | 0.59 | 0.98 |
| RPS21     | 8.76 | 5.17 | 5.18 | 0.59 | 0.59 |
| ADGRE5    | 0.99 | 0.70 | 0.58 | 0.59 | 0.71 |
| KRT10     | 1.55 | 1.18 | 0.91 | 0.59 | 0.77 |
| IER3      | 4.12 | 1.43 | 2.42 | 0.59 | 0.35 |
| NAMPT     | 5.90 | 3.11 | 3.46 | 0.59 | 0.53 |
| UPP1      | 4.13 | 2.75 | 2.42 | 0.59 | 0.67 |
| MAP2K1    | 1.22 | 0.73 | 0.71 | 0.58 | 0.60 |
| RNF149    | 1.69 | 1.19 | 0.99 | 0.58 | 0.71 |
| DNAJB11   | 1.08 | 0.71 | 0.63 | 0.58 | 0.66 |
| ADAM17    | 1.20 | 0.73 | 0.70 | 0.58 | 0.61 |
| CCL2      | 7.05 | 4.92 | 4.09 | 0.58 | 0.70 |
| LYAR      | 1.05 | 0.73 | 0.61 | 0.58 | 0.70 |
| JMJD1C    | 1.31 | 0.94 | 0.76 | 0.58 | 0.72 |

|           |       |       |      |      |      |
|-----------|-------|-------|------|------|------|
| TAF9      | 1.10  | 0.75  | 0.64 | 0.58 | 0.68 |
| C19orf70  | 2.11  | 1.65  | 1.22 | 0.58 | 0.78 |
| FPR1      | 1.03  | 0.75  | 0.59 | 0.58 | 0.73 |
| RBM3      | 3.89  | 2.62  | 2.24 | 0.58 | 0.67 |
| NR4A1     | 1.10  | 0.57  | 0.63 | 0.58 | 0.51 |
| MT1G      | 2.30  | 0.68  | 1.32 | 0.57 | 0.30 |
| RPS26     | 9.80  | 5.55  | 5.63 | 0.57 | 0.57 |
| DDX18     | 0.98  | 0.68  | 0.56 | 0.57 | 0.70 |
| PRDX5     | 2.46  | 1.78  | 1.39 | 0.57 | 0.72 |
| PPP1CC    | 1.12  | 0.85  | 0.63 | 0.57 | 0.76 |
| C1orf162  | 5.41  | 4.92  | 3.05 | 0.56 | 0.91 |
| SKIL      | 0.97  | 0.63  | 0.54 | 0.56 | 0.66 |
| DOK2      | 1.04  | 0.81  | 0.58 | 0.56 | 0.79 |
| VASP      | 2.05  | 1.55  | 1.14 | 0.56 | 0.76 |
| C5AR1     | 3.25  | 2.16  | 1.80 | 0.55 | 0.66 |
| CD52      | 11.20 | 8.92  | 6.16 | 0.55 | 0.80 |
| TREM1     | 2.17  | 1.42  | 1.19 | 0.55 | 0.66 |
| AREG      | 16.54 | 14.51 | 9.00 | 0.54 | 0.88 |
| MORF4L2   | 1.03  | 0.51  | 0.56 | 0.54 | 0.50 |
| CDC37     | 1.51  | 1.15  | 0.82 | 0.54 | 0.76 |
| LRPAP1    | 2.70  | 2.22  | 1.46 | 0.54 | 0.82 |
| PTPRE     | 1.21  | 0.63  | 0.64 | 0.53 | 0.53 |
| MAP2K3    | 0.98  | 0.50  | 0.52 | 0.53 | 0.51 |
| EML4      | 1.06  | 0.82  | 0.56 | 0.53 | 0.77 |
| SLC3A2    | 1.48  | 0.82  | 0.78 | 0.53 | 0.55 |
| MMP24-AS1 | 1.05  | 0.89  | 0.56 | 0.53 | 0.84 |
| LSM7      | 1.62  | 1.09  | 0.85 | 0.53 | 0.67 |
| CXCL5     | 0.95  | 0.30  | 0.50 | 0.52 | 0.32 |
| IDH1      | 1.28  | 0.86  | 0.67 | 0.52 | 0.67 |
| GRINA     | 2.15  | 1.73  | 1.13 | 0.52 | 0.81 |
| TUBB4B    | 1.59  | 1.02  | 0.83 | 0.52 | 0.64 |
| HSD17B10  | 0.99  | 0.67  | 0.52 | 0.52 | 0.68 |
| LRRC59    | 0.98  | 0.71  | 0.51 | 0.52 | 0.73 |
| NUS1      | 0.96  | 0.69  | 0.50 | 0.52 | 0.72 |
| NAA50     | 1.27  | 0.73  | 0.66 | 0.52 | 0.58 |
| APIP      | 0.99  | 0.72  | 0.52 | 0.52 | 0.72 |
| LY6E      | 3.29  | 2.64  | 1.68 | 0.51 | 0.80 |
| TCP1      | 1.16  | 0.68  | 0.59 | 0.51 | 0.58 |
| XBP1      | 2.05  | 1.19  | 1.03 | 0.50 | 0.58 |
| SERTAD1   | 1.16  | 0.75  | 0.58 | 0.50 | 0.65 |
| NDUFA6    | 1.85  | 1.07  | 0.92 | 0.50 | 0.58 |
| SDF2L1    | 2.41  | 1.56  | 1.19 | 0.49 | 0.65 |



|            |       |       |       |      |      |
|------------|-------|-------|-------|------|------|
| SELK       | 4.27  | 2.41  | 2.11  | 0.49 | 0.56 |
| CTNNB1     | 2.92  | 2.34  | 1.43  | 0.49 | 0.80 |
| CLEC7A     | 1.69  | 1.07  | 0.83  | 0.49 | 0.63 |
| CORO1A     | 1.08  | 0.75  | 0.53  | 0.49 | 0.70 |
| VEGFA      | 1.12  | 0.41  | 0.55  | 0.49 | 0.37 |
| CYCS       | 4.54  | 2.85  | 2.21  | 0.49 | 0.63 |
| DUSP4      | 1.28  | 0.51  | 0.62  | 0.49 | 0.40 |
| ETS2       | 2.64  | 1.25  | 1.29  | 0.49 | 0.47 |
| CD55       | 1.93  | 1.03  | 0.94  | 0.49 | 0.54 |
| SFPQ       | 1.57  | 0.92  | 0.76  | 0.48 | 0.59 |
| STXBP2     | 2.00  | 1.46  | 0.96  | 0.48 | 0.73 |
| CXCL8      | 13.72 | 3.51  | 6.60  | 0.48 | 0.26 |
| MYDGF      | 3.58  | 2.86  | 1.72  | 0.48 | 0.80 |
| ECH1       | 1.35  | 0.99  | 0.64  | 0.47 | 0.73 |
| MPHOSPH6   | 1.39  | 0.79  | 0.65  | 0.47 | 0.57 |
| SAMSN1     | 3.98  | 2.04  | 1.84  | 0.46 | 0.51 |
| ID3        | 1.45  | 1.25  | 0.67  | 0.46 | 0.86 |
| MIF        | 2.73  | 1.05  | 1.26  | 0.46 | 0.39 |
| CXCL1      | 1.34  | 0.18  | 0.62  | 0.46 | 0.13 |
| CACYBP     | 1.75  | 0.86  | 0.80  | 0.46 | 0.49 |
| SYAP1      | 1.40  | 0.79  | 0.62  | 0.45 | 0.57 |
| MAP3K8     | 2.89  | 1.75  | 1.27  | 0.44 | 0.61 |
| EIF5A      | 3.35  | 1.93  | 1.47  | 0.44 | 0.58 |
| AC090498.1 | 2.04  | 0.99  | 0.90  | 0.44 | 0.49 |
| GCA        | 1.52  | 0.99  | 0.67  | 0.44 | 0.65 |
| INSIG1     | 2.46  | 0.77  | 1.07  | 0.43 | 0.31 |
| STK17B     | 1.16  | 0.66  | 0.50  | 0.43 | 0.57 |
| CXCL3      | 18.00 | 6.43  | 7.76  | 0.43 | 0.36 |
| PHACTR1    | 1.80  | 1.44  | 0.77  | 0.43 | 0.80 |
| ACADVL     | 1.64  | 1.15  | 0.68  | 0.42 | 0.70 |
| MRPL23     | 1.38  | 0.71  | 0.57  | 0.41 | 0.51 |
| EREG       | 4.03  | 1.19  | 1.64  | 0.41 | 0.29 |
| MXD1       | 1.72  | 0.86  | 0.70  | 0.41 | 0.50 |
| ANPEP      | 1.61  | 0.64  | 0.65  | 0.40 | 0.40 |
| NBEAL1     | 4.12  | 1.44  | 1.65  | 0.40 | 0.35 |
| MT2A       | 37.00 | 10.90 | 14.63 | 0.40 | 0.29 |
| MANF       | 2.12  | 1.25  | 0.83  | 0.39 | 0.59 |
| CH25H      | 1.30  | 0.79  | 0.51  | 0.39 | 0.60 |
| CDKN1A     | 2.44  | 1.31  | 0.94  | 0.39 | 0.54 |
| OLR1       | 4.47  | 3.14  | 1.70  | 0.38 | 0.70 |
| MT1X       | 6.91  | 1.79  | 2.63  | 0.38 | 0.26 |
| NOP10      | 10.73 | 5.36  | 4.03  | 0.38 | 0.50 |

|         |       |      |      |      |      |
|---------|-------|------|------|------|------|
| MRC1    | 7.32  | 3.77 | 2.64 | 0.36 | 0.52 |
| PPIF    | 1.80  | 0.80 | 0.64 | 0.35 | 0.45 |
| CCL20   | 12.94 | 2.05 | 4.43 | 0.34 | 0.16 |
| IL7R    | 1.75  | 1.20 | 0.56 | 0.32 | 0.69 |
| IL1B    | 5.72  | 0.78 | 1.73 | 0.30 | 0.14 |
| THBD    | 5.37  | 1.97 | 1.60 | 0.30 | 0.37 |
| ALOX5AP | 16.11 | 6.86 | 4.80 | 0.30 | 0.43 |
| VCAN    | 2.21  | 1.04 | 0.63 | 0.28 | 0.47 |
| B3GNT5  | 1.96  | 0.84 | 0.55 | 0.28 | 0.43 |
| RETN    | 4.32  | 2.21 | 0.95 | 0.22 | 0.51 |
| MCEMP1  | 4.64  | 2.69 | 0.88 | 0.19 | 0.58 |
| MT1E    | 3.60  | 0.41 | 0.64 | 0.18 | 0.11 |
| THBS1   | 5.79  | 1.62 | 0.91 | 0.16 | 0.28 |

**Table S9. Connectivity map first order neighbors**

|       |     |          |
|-------|-----|----------|
| ABCA3 | --> | CACNA2D2 |
| ABCA3 | --> | CADM1    |
| ABCA3 | --> | CKB      |
| ABCA3 | --> | CRNDE    |
| ABCA3 | --> | DMBT1    |
| ABCA3 | --> | FAM129B  |
| ABCA3 | --> | FASN     |
| ABCA3 | --> | LPCAT1   |
| ABCA3 | --> | LRRK2    |
| ABCA3 | --> | PEBP4    |
| ABCA3 | --> | SCGB3A2  |
| ABCA3 | --> | SERPINA1 |
| ABCA3 | --> | SFTPA1   |
| ABCA3 | --> | SLC22A31 |
| ABCA3 | --> | TMEM45A  |
| ABCA7 | --> | GSTA1    |
| ABCA7 | --> | MMP1     |
| ABCA7 | --> | NTM      |
| ABCA7 | --> | TNNC1    |
| ACP5  | --> | APOC1    |
| ACP5  | --> | APOE     |
| ACP5  | --> | BRI3     |
| ACP5  | --> | CD9      |
| ACP5  | --> | CTSD     |
| ACP5  | --> | CTSL     |
| ACP5  | --> | CTSS     |
| ACP5  | --> | CYP27A1  |
| ACP5  | --> | FBP1     |
| ACP5  | --> | GCHFR    |
| ACP5  | --> | GPNMB    |
| ACP5  | --> | GRN      |
| ACP5  | --> | GSTO1    |
| ACP5  | --> | H2AFY    |
| ACP5  | --> | HEXB     |
| ACP5  | --> | LGALS3   |
| ACP5  | --> | LYZ      |
| ACP5  | --> | MARCO    |
| ACP5  | --> | SDC2     |
| ACP5  | --> | TGFBI    |
| ACP5  | --> | TPM2     |
| ACTB  | --> | CALM2    |

|        |     |          |
|--------|-----|----------|
| ACTB   | --> | CD47     |
| ACTB   | --> | MYL9     |
| ACTB   | --> | POLR2L   |
| ACTB   | --> | PPT1     |
| ACTB   | --> | SNHG8    |
| ACTB   | --> | TAGLN    |
| ACTB   | --> | TYMP     |
| ADGRF5 | --> | BCAM     |
| ADGRF5 | --> | CAPN8    |
| ADGRF5 | --> | CDH1     |
| ADGRF5 | --> | KRT15    |
| ADGRF5 | --> | LDLR     |
| ADGRF5 | --> | LMO3     |
| ADGRF5 | --> | LPCAT1   |
| ADGRF5 | --> | MLPH     |
| ADGRF5 | --> | MYO1B    |
| ADGRF5 | --> | PEG10    |
| ADGRF5 | --> | SCNN1A   |
| ADGRF5 | --> | SMIM22   |
| ADGRF5 | --> | TMC5     |
| ADGRF5 | --> | WIF1     |
| ADH1B  | --> | CFD      |
| ADH1B  | --> | CKB      |
| ADH1B  | --> | EFEMP1   |
| ADH1B  | --> | FBLN2    |
| ADH1B  | --> | FGF7     |
| ADH1B  | --> | FHL1     |
| ADH1B  | --> | FMO2     |
| ADH1B  | --> | GPC3     |
| ADH1B  | --> | INMT     |
| ADH1B  | --> | PLAC9    |
| ADH1B  | --> | PMP22    |
| ADH1B  | --> | SEPP1    |
| ADH1B  | --> | SFRP2    |
| ADH1B  | --> | TCF21    |
| ADH1B  | --> | TSPAN8   |
| AEBP1  | --> | CALD1    |
| AGER   | --> | ABCA3    |
| AGER   | --> | ARHGEF26 |
| AGER   | --> | C4BPA    |
| AGER   | --> | CLIC3    |
| AGER   | --> | CYP4B1   |

|      |     |           |
|------|-----|-----------|
| AGER | --> | FABP5     |
| AGER | --> | LAMA3     |
| AGER | --> | LAMP3     |
| AGER | --> | LPCAT1    |
| AGER | --> | PGC       |
| AGER | --> | S100A2    |
| AGER | --> | SCGB3A1   |
| AGER | --> | SFTPA1    |
| AGER | --> | SFTPC     |
| AGER | --> | SLC22A31  |
| AGER | --> | SUSD2     |
| AGR2 | --> | AGR3      |
| AGR2 | --> | CD63      |
| AGR2 | --> | CYP4B1    |
| AGR2 | --> | FGFBP1    |
| AGR2 | --> | HMGB3     |
| AGR2 | --> | RAB25     |
| AGR2 | --> | RARRES3   |
| AGR2 | --> | SCNN1B    |
| AGR2 | --> | SDR16C5   |
| AGR2 | --> | STARD10   |
| AGR2 | --> | SYTL1     |
| AGR2 | --> | TFF3      |
| AGR2 | --> | TSPAN1    |
| AGR2 | --> | WFDC2     |
| AGR3 | --> | ADGRF5    |
| AGR3 | --> | AK1       |
| AGR3 | --> | ARFGEF3   |
| AGR3 | --> | CAPN8     |
| AGR3 | --> | CDH1      |
| AGR3 | --> | CLDN3     |
| AGR3 | --> | CYP4B1    |
| AGR3 | --> | DSTN      |
| AGR3 | --> | ERBB3     |
| AGR3 | --> | FABP5     |
| AGR3 | --> | FGY       |
| AGR3 | --> | PRSS8     |
| AGR3 | --> | RAB11FIP1 |
| AGR3 | --> | RAB25     |
| AGR3 | --> | RNF145    |
| AGR3 | --> | SCGB3A2   |
| AGR3 | --> | SCNN1A    |

|         |     |           |
|---------|-----|-----------|
| AGR3    | --> | SDC4      |
| AGR3    | --> | SMIM22    |
| AIF1    | --> | ACP5      |
| AIF1    | --> | ACTB      |
| AIF1    | --> | ASAH1     |
| AIF1    | --- | C1QA      |
| AIF1    | --- | C1QB      |
| AIF1    | --- | C1QC      |
| AIF1    | --> | CD9       |
| AIF1    | --> | CFD       |
| AIF1    | --> | FCER1G    |
| AIF1    | --> | FPR3      |
| AIF1    | --> | GPX1      |
| AIF1    | --> | LCN2      |
| AIF1    | --> | LST1      |
| AIF1    | --> | MS4A4A    |
| AIF1    | --> | MS4A6A    |
| AIF1    | --> | MS4A7     |
| AIF1    | --> | SCEL      |
| AIF1    | --> | TACC2     |
| AIF1    | --> | TGFBI     |
| AIF1    | --> | TREM2     |
| AIF1    | --> | TYROBP    |
| AIF1    | --> | VSIG4     |
| AK1     | --> | FGGY      |
| AK1     | --> | MYO1B     |
| AK1     | --> | POLR2L    |
| AK1     | --> | STARD10   |
| ALCAM   | --> | RAB11FIP1 |
| ALCAM   | --> | SPINT1    |
| ALDH3A1 | --> | ANOS1     |
| ALDH3A1 | --> | DHRS3     |
| ALDH3A1 | --> | GLUL      |
| ALDH3A1 | --> | SCPEP1    |
| ALPL    | --> | CKB       |
| ALPL    | --> | CLDN1     |
| ALPL    | --> | DUSP6     |
| ALPL    | --> | FASN      |
| ALPL    | --> | MFSD2A    |
| ALPL    | --> | PARM1     |
| ALPL    | --> | PEG10     |
| ALPL    | --> | RAB25     |

|       |     |          |
|-------|-----|----------|
| ALPL  | --> | SCPEP1   |
| ALPL  | --> | SMIM22   |
| ANOS1 | --> | ANKRD29  |
| ANOS1 | --> | FAM213A  |
| ANOS1 | --> | PCYOX1   |
| ANXA3 | --> | AGER     |
| ANXA3 | --> | AGR3     |
| ANXA3 | --> | ANOS1    |
| ANXA3 | --> | C12orf49 |
| ANXA3 | --> | C15orf48 |
| ANXA3 | --> | CRACR2B  |
| ANXA3 | --> | CTSB     |
| ANXA3 | --> | CTSE     |
| ANXA3 | --> | CXCL14   |
| ANXA3 | --> | DUSP6    |
| ANXA3 | --> | FBXO32   |
| ANXA3 | --> | HEXB     |
| ANXA3 | --> | LCN2     |
| ANXA3 | --> | LRRK2    |
| ANXA3 | --> | MLPH     |
| ANXA3 | --> | MUC5B    |
| ANXA3 | --> | PCYOX1   |
| ANXA3 | --> | PDLIM2   |
| ANXA3 | --> | PLEKHJ1  |
| ANXA3 | --> | PLLP     |
| ANXA3 | --> | SDC2     |
| ANXA3 | --> | SGK1     |
| ANXA3 | --> | TSPAN8   |
| AP2S1 | --> | ATOX1    |
| AP2S1 | --> | ATP6V1F  |
| AP2S1 | --> | CSTB     |
| AP2S1 | --> | CTSB     |
| AP2S1 | --> | CTSD     |
| AP2S1 | --> | CYBA     |
| AP2S1 | --> | GCHFR    |
| AP2S1 | --> | GPX1     |
| AP2S1 | --> | LGALS1   |
| AP2S1 | --> | LILRB4   |
| AP2S1 | --> | TYMP     |
| APLP2 | --> | CTNNA1   |
| APLP2 | --> | MT.ND1   |
| APOC1 | --> | APOE     |

|          |     |         |
|----------|-----|---------|
| APOC1    | --> | ASAH1   |
| APOC1    | --> | ATOX1   |
| APOC1    | --> | CCL18   |
| APOC1    | --> | CD151   |
| APOC1    | --> | CSTB    |
| APOC1    | --> | EMP3    |
| APOC1    | --> | FABP5   |
| APOC1    | --> | GPNMB   |
| APOC1    | --> | HLA.DMB |
| APOC1    | --> | LIPA    |
| APOC1    | --> | LY96    |
| APOC1    | --> | MRC1    |
| APOC1    | --> | RPS4Y1  |
| APOC1    | --> | SCGB3A1 |
| APOC1    | --> | TFRC    |
| APOC1    | --> | TREM2   |
| APOD     | --> | MT.ND1  |
| APOE     | --> | ASPH    |
| APOE     | --> | CAPN2   |
| APOE     | --> | CD55    |
| APOE     | --> | CREG1   |
| APOE     | --> | PLD3    |
| APOE     | --> | RARRES1 |
| ARFGEF3  | --> | ALCAM   |
| ARFGEF3  | --> | CAPN8   |
| ARFGEF3  | --> | CRNDE   |
| ARFGEF3  | --> | CXADR   |
| ARFGEF3  | --> | LDLR    |
| ARFGEF3  | --> | MAGI3   |
| ARFGEF3  | --> | MLLT4   |
| ARFGEF3  | --> | MLPH    |
| ARFGEF3  | --> | STARD10 |
| ARFGEF3  | --> | TACC2   |
| ARHGEF26 | --> | CTGF    |
| ARHGEF26 | --> | PRKCZ   |
| ARL4D    | --> | ALDH3A1 |
| ARL4D    | --> | MYC     |
| ARL4D    | --> | ODC1    |
| ASAH1    | --> | APLP2   |
| ASAH1    | --> | CD63    |
| ASPH     | --> | APLP2   |
| ASPN     | --> | ADH1B   |



|         |     |         |
|---------|-----|---------|
| ASPN    | --> | AEBP1   |
| ASPN    | --> | APOE    |
| ASPN    | --> | BGN     |
| ASPN    | --> | C3      |
| ASPN    | --> | C7      |
| ASPN    | --> | CFD     |
| ASPN    | --> | CHI3L2  |
| ASPN    | --> | COL1A2  |
| ASPN    | --> | COL4A3  |
| ASPN    | --> | COL5A1  |
| ASPN    | --> | COL5A2  |
| ASPN    | --> | COL6A2  |
| ASPN    | --> | COL6A3  |
| ASPN    | --> | COL8A1  |
| ASPN    | --> | CTHRC1  |
| ASPN    | --> | CXCL12  |
| ASPN    | --> | DKK3    |
| ASPN    | --> | DPT     |
| ASPN    | --> | EMILIN1 |
| ASPN    | --> | HTRA3   |
| ASPN    | --> | IGFBP5  |
| ASPN    | --> | LTBP1   |
| ASPN    | --> | LTBP2   |
| ASPN    | --> | MT.ND1  |
| ASPN    | --> | MYC     |
| ASPN    | --> | NCKAP5  |
| ASPN    | --> | PLAC9   |
| ASPN    | --> | POSTN   |
| ASPN    | --> | PTGDS   |
| ASPN    | --> | RARRES1 |
| ASPN    | --> | SFRP4   |
| ASPN    | --> | TSC22D1 |
| ATF3    | --> | HES1    |
| ATF3    | --> | IER3    |
| ATF3    | --> | NEAT1   |
| ATP11A  | --> | CPM     |
| ATP1A1  | --> | SPTSSA  |
| ATP6V1F | --> | ATP6V0B |
| BCAM    | --> | ALDH3A1 |
| BCAM    | --> | DHRS3   |
| BCAM    | --> | FBXO32  |
| BCAM    | --> | FLRT3   |

|        |     |         |
|--------|-----|---------|
| BCAM   | --> | HOOK2   |
| BCAM   | --> | IGFBP2  |
| BCAM   | --> | LMO3    |
| BCAM   | --> | MAGI3   |
| BCAM   | --> | PRKCZ   |
| BCAM   | --> | SCNN1B  |
| BCAM   | --> | SYTL1   |
| BCAM   | --> | WIF1    |
| BGN    | --> | AEBP1   |
| BGN    | --> | C1S     |
| BGN    | --> | COL1A2  |
| BGN    | --> | COL3A1  |
| BGN    | --> | COL6A2  |
| BGN    | --> | COL6A3  |
| BGN    | --> | CTHRC1  |
| BGN    | --> | DPT     |
| BGN    | --> | EFEMP1  |
| BGN    | --> | ELN     |
| BGN    | --> | FBLN2   |
| BGN    | --> | FBN1    |
| BGN    | --> | IGF1    |
| BGN    | --> | INMT    |
| BGN    | --> | LTBP1   |
| BGN    | --> | LTBP2   |
| BGN    | --> | LUM     |
| BGN    | --> | MGP     |
| BGN    | --> | MMP2    |
| BGN    | --> | MXRA8   |
| BGN    | --> | NBL1    |
| BGN    | --> | OLFML3  |
| BGN    | --> | PCOLCE  |
| BGN    | --> | PDLIM3  |
| BGN    | --> | RTKN2   |
| BGN    | --> | SPARC   |
| BGN    | --> | TAGLN   |
| BGN    | --> | THY1    |
| BGN    | --> | TNNC1   |
| BGN    | --> | TPM2    |
| BLVRB  | --> | SEPP1   |
| BPIFB1 | --> | CLDN3   |
| BPIFB1 | --> | SCGB1A1 |
| BRI3   | --> | ATP6V0B |

|          |     |           |
|----------|-----|-----------|
| BRI3     | --> | ATP6V1F   |
| BRI3     | --> | CTSZ      |
| BRI3     | --> | CYBA      |
| BRI3     | --> | DAB2      |
| BRI3     | --> | HPCAL1    |
| BRI3     | --> | MT.ND1    |
| BRI3     | --> | MYL12B    |
| BRI3     | --> | RAB11FIP1 |
| C10orf10 | --> | CEBPD     |
| C12orf49 | --> | MGLL      |
| C12orf49 | --> | STARD10   |
| C15orf48 | --> | ATOX1     |
| C15orf48 | --> | DUSP6     |
| C15orf48 | --> | TYMP      |
| C1QA     | --> | ATP1A1    |
| C1QA     | --- | C1QB      |
| C1QA     | --- | C1QC      |
| C1QA     | --> | CREG1     |
| C1QA     | --> | HLA.DMA   |
| C1QA     | --> | HLA.DPA1  |
| C1QA     | --> | LGALS3    |
| C1QA     | --> | LST1      |
| C1QA     | --> | MRC1      |
| C1QA     | --> | MS4A6A    |
| C1QA     | --> | MS4A7     |
| C1QA     | --> | SEPP1     |
| C1QA     | --> | SPP1      |
| C1QA     | --> | TNNC1     |
| C1QA     | --> | TYROBP    |
| C1QA     | --> | VSIG4     |
| C1QB     | --> | APOC1     |
| C1QB     | --> | APOE      |
| C1QB     | --- | C1QC      |
| C1QB     | --> | CCL18     |
| C1QB     | --> | FCER1G    |
| C1QB     | --> | LY96      |
| C1QB     | --> | MS4A4A    |
| C1QB     | --> | MSR1      |
| C1QB     | --> | TIMP1     |
| C1QC     | --> | C15orf48  |
| C1QC     | --> | CA2       |
| C1QC     | --> | CD163     |

|      |     |          |
|------|-----|----------|
| C1QC | --> | COL6A3   |
| C1QC | --> | CSTB     |
| C1QC | --> | CTSK     |
| C1QC | --> | CYP1B1   |
| C1QC | --> | DAPK2    |
| C1QC | --> | FAM105A  |
| C1QC | --> | FOLR2    |
| C1QC | --> | MARCO    |
| C1QC | --> | MS4A6A   |
| C1QC | --> | MSR1     |
| C1QC | --> | PLD3     |
| C1QC | --> | PMP22    |
| C1QC | --> | SH3BGRL3 |
| C1QC | --> | SPARC    |
| C1QC | --> | TGFBI    |
| C1QC | --> | TREM2    |
| C1QC | --> | VSIG4    |
| C1R  | --> | AEBP1    |
| C1R  | --> | APOD     |
| C1R  | --> | C3       |
| C1R  | --> | CFH      |
| C1R  | --> | CHI3L2   |
| C1R  | --> | DCN      |
| C1R  | --> | EFEMP1   |
| C1R  | --> | FBLN1    |
| C1R  | --> | GPX1     |
| C1R  | --> | NNMT     |
| C1R  | --> | PLS3     |
| C1R  | --> | PSAP     |
| C1R  | --> | SELM     |
| C1R  | --> | SEPP1    |
| C1R  | --> | SERPING1 |
| C1S  | --> | ADH1B    |
| C1S  | --> | C1R      |
| C1S  | --> | C7       |
| C1S  | --> | CXCL14   |
| C1S  | --> | DCN      |
| C1S  | --> | FBLN1    |
| C1S  | --> | LUM      |
| C1S  | --> | MXRA8    |
| C1S  | --> | OLFML3   |
| C1S  | --> | RARRES2  |

|          |     |          |
|----------|-----|----------|
| C1S      | --> | SERPING1 |
| C1S      | --> | SFRP2    |
| C3       | --> | CAPG     |
| C3       | --> | CYR61    |
| C3       | --> | NNMT     |
| C4BPA    | --> | ABCA3    |
| C4BPA    | --> | ALPL     |
| C4BPA    | --> | C3       |
| C4BPA    | --> | CACNA2D2 |
| C4BPA    | --> | DHRS3    |
| C4BPA    | --> | FGGY     |
| C4BPA    | --> | GKN2     |
| C4BPA    | --> | LAMP3    |
| C4BPA    | --> | LRRK2    |
| C4BPA    | --> | PARM1    |
| C4BPA    | --> | PEBP4    |
| C4BPA    | --> | PGC      |
| C4BPA    | --> | SDR16C5  |
| C4BPA    | --> | SERPINA1 |
| C4BPA    | --> | SFTPD    |
| C4BPA    | --> | SLC6A14  |
| C7       | --> | A2M      |
| C7       | --> | ADH1B    |
| C7       | --> | C10orf10 |
| C7       | --> | CXCL12   |
| C7       | --> | CXCL14   |
| C7       | --> | EMILIN1  |
| C7       | --> | GPC3     |
| C7       | --> | INMT     |
| C7       | --> | LTBP2    |
| C7       | --> | SCGB3A1  |
| C7       | --> | SDC2     |
| C7       | --> | SEPP1    |
| C7       | --> | SH3BGRL3 |
| C7       | --> | TGFBI    |
| C7       | --> | TSPAN8   |
| CA2      | --> | FAM213A  |
| CA2      | --> | HPCAL1   |
| CA2      | --> | MID1IP1  |
| CA2      | --> | TSPAN1   |
| CACNA2D2 | --> | ARFGEF3  |
| CACNA2D2 | --> | DMBT1    |

|          |     |           |
|----------|-----|-----------|
| CACNA2D2 | --> | FASN      |
| CACNA2D2 | --> | LRRK2     |
| CACNA2D2 | --> | RAB11FIP1 |
| CACNA2D2 | --> | TSC22D1   |
| CACNA2D2 | --> | WIF1      |
| CADM1    | --> | CPM       |
| CALD1    | --> | ALCAM     |
| CALD1    | --> | C10orf10  |
| CALD1    | --> | CAV1      |
| CALD1    | --> | COL14A1   |
| CALD1    | --> | CSTB      |
| CALD1    | --> | DKK3      |
| CALD1    | --> | FABP5     |
| CALD1    | --> | FBLN2     |
| CALD1    | --> | GPC3      |
| CALD1    | --> | HTRA3     |
| CALD1    | --> | IGFBP4    |
| CALD1    | --> | IGFBP5    |
| CALD1    | --> | LGALS1    |
| CALD1    | --> | LTBP2     |
| CALD1    | --> | MEG3      |
| CALD1    | --> | MOXD1     |
| CALD1    | --> | NNMT      |
| CALD1    | --> | PLAC9     |
| CALD1    | --> | TGFBI     |
| CALD1    | --> | TIMP3     |
| CALD1    | --> | TPM2      |
| CALM3    | --> | ATOX1     |
| CAPG     | --> | CD9       |
| CAPG     | --> | CYP27A1   |
| CAPG     | --> | FASN      |
| CAPG     | --> | GRN       |
| CAPG     | --> | IFI6      |
| CAPG     | --> | TMEM45A   |
| CAPN2    | --> | CTNNA1    |
| CAPN8    | --> | HOOK2     |
| CAPN8    | --> | MAGI3     |
| CAPN8    | --> | SCNN1A    |
| CAV1     | --> | APLP2     |
| CAV1     | --> | CD55      |
| CAV1     | --> | DSTN      |
| CAV1     | --> | MYL12B    |

|        |     |          |
|--------|-----|----------|
| CAV1   | --> | MYL9     |
| CAV1   | --> | PDLIM2   |
| CAV1   | --> | TRAM1    |
| CAV2   | --> | AK1      |
| CAV2   | --> | ANXA3    |
| CAV2   | --> | CAV1     |
| CAV2   | --> | CD68     |
| CAV2   | --> | CLIC3    |
| CAV2   | --> | CYR61    |
| CAV2   | --> | DSTN     |
| CAV2   | --> | LGALS3   |
| CAV2   | --> | MBIP     |
| CAV2   | --> | MPZL2    |
| CAV2   | --> | PLL      |
| CAV2   | --> | RAB25    |
| CAV2   | --> | SDC4     |
| CAV2   | --> | SPARC    |
| CCDC80 | --> | CFD      |
| CCDC80 | --> | CFH      |
| CCDC80 | --> | CPM      |
| CCDC80 | --> | FGFBP1   |
| CCDC80 | --> | GSN      |
| CCDC80 | --> | LAMP3    |
| CCDC80 | --> | PLA2G7   |
| CCDC80 | --> | SEMA3B   |
| CCDC80 | --> | TIMP1    |
| CCDC80 | --> | TSPAN1   |
| CCL18  | --> | APOE     |
| CCL18  | --> | CFD      |
| CCL18  | --> | CTSH     |
| CCL18  | --> | CTSK     |
| CCL18  | --> | CTSZ     |
| CCL18  | --> | DAB2     |
| CCL18  | --> | GSN      |
| CCL18  | --> | LGMN     |
| CCL18  | --> | NEAT1    |
| CCL18  | --> | SCD      |
| CCL18  | --> | SEPP1    |
| CCL20  | --> | C15orf48 |
| CCL20  | --> | CA2      |
| CCL20  | --> | CXCL1    |
| CCL20  | --> | CXCL2    |

|       |     |          |
|-------|-----|----------|
| CCL20 | --> | IER3     |
| CCL20 | --> | ODC1     |
| CCL20 | --> | SDC4     |
| CCL20 | --> | SERPINA1 |
| CCL20 | --> | TREM2    |
| CD14  | --> | BLVRB    |
| CD14  | --> | CAPG     |
| CD14  | --> | CFD      |
| CD14  | --> | COL4A4   |
| CD14  | --> | CSTB     |
| CD14  | --> | CTSD     |
| CD14  | --> | CTSS     |
| CD14  | --> | GCHFR    |
| CD14  | --> | GGT1     |
| CD14  | --> | HLA.DMB  |
| CD14  | --> | HLA.DRB1 |
| CD14  | --> | LGALS1   |
| CD14  | --> | LILRB4   |
| CD14  | --> | MAP2     |
| CD14  | --> | MERTK    |
| CD14  | --> | MYL12B   |
| CD14  | --> | SH3BGRL3 |
| CD14  | --> | SPARC    |
| CD151 | --> | CLTB     |
| CD163 | --> | AP2S1    |
| CD163 | --> | CTSB     |
| CD163 | --> | CTSD     |
| CD163 | --> | CTSL     |
| CD163 | --> | FOLR2    |
| CD163 | --> | FPR3     |
| CD163 | --> | GCHFR    |
| CD163 | --> | GLUL     |
| CD163 | --> | MARCO    |
| CD163 | --> | MERTK    |
| CD163 | --> | MFSD1    |
| CD163 | --> | MMP2     |
| CD163 | --> | MRC1     |
| CD163 | --> | MSR1     |
| CD163 | --> | PMP22    |
| CD163 | --> | RPS4Y1   |
| CD163 | --> | SPP1     |
| CD163 | --> | SYTL1    |



|       |     |           |
|-------|-----|-----------|
| CD163 | --> | TMEM243   |
| CD163 | --> | VSIG4     |
| CD24  | --> | CADM1     |
| CD24  | --> | CAPN2     |
| CD24  | --> | CKB       |
| CD24  | --> | CLDN3     |
| CD24  | --> | ERBB3     |
| CD24  | --> | KRT17     |
| CD24  | --> | LAMB3     |
| CD24  | --> | LMO3      |
| CD24  | --> | MDK       |
| CD24  | --> | OCIAD2    |
| CD24  | --> | S100A2    |
| CD24  | --> | SCNN1A    |
| CD24  | --> | VSIG2     |
| CD55  | --> | A2M       |
| CD55  | --> | NCOA7     |
| CD63  | --> | ATP6V0B   |
| CD63  | --> | CD9       |
| CD63  | --> | COX6C     |
| CD63  | --> | CYBA      |
| CD63  | --> | GLUL      |
| CD63  | --> | HEXB      |
| CD63  | --> | IFI6      |
| CD63  | --> | MYL12B    |
| CD68  | --> | ACP5      |
| CD68  | --> | ATP6V1F   |
| CD68  | --> | CREG1     |
| CD68  | --> | CSTB      |
| CD68  | --> | CTSB      |
| CD68  | --> | CTSD      |
| CD68  | --> | CTSK      |
| CD68  | --> | CYBB      |
| CD68  | --> | CYP27A1   |
| CD68  | --> | EMP3      |
| CD68  | --> | FBP1      |
| CD68  | --> | GRN       |
| CD68  | --> | LAPTM5    |
| CD68  | --> | LGALS3    |
| CD68  | --> | LILRB4    |
| CD68  | --> | LINC01272 |
| CD68  | --> | MARCO     |

|       |     |           |
|-------|-----|-----------|
| CD68  | --> | OCIAD2    |
| CD68  | --> | PLA2G7    |
| CD68  | --> | PMP22     |
| CD68  | --> | RNF130    |
| CD68  | --> | VIM       |
| CD9   | --> | ALCAM     |
| CD9   | --> | APLP2     |
| CD9   | --> | CALM2     |
| CD9   | --> | CAPN2     |
| CD9   | --> | CD151     |
| CD9   | --> | CD55      |
| CD9   | --> | SPINT1    |
| CDH1  | --> | CAPN8     |
| CDH1  | --> | CD24      |
| CDH1  | --> | CLDN1     |
| CDH1  | --> | CTNNA1    |
| CDH1  | --> | CXADR     |
| CDH1  | --> | ERBB3     |
| CDH1  | --> | FAM129B   |
| CDH1  | --> | LAMB3     |
| CDH1  | --> | MLLT4     |
| CDH1  | --> | PLEKHJ1   |
| CDH1  | --> | PRKCZ     |
| CDH1  | --> | RAB11FIP1 |
| CDH1  | --> | S100A2    |
| CDH1  | --> | SCNN1A    |
| CDH1  | --> | TACC2     |
| CDH1  | --> | TMC5      |
| CDH11 | --> | COL14A1   |
| CDH11 | --> | COL8A1    |
| CDH11 | --> | DKK3      |
| CDH11 | --> | GPC3      |
| CDH11 | --> | GPNMB     |
| CDH11 | --> | GSN       |
| CDH11 | --> | MOXD1     |
| CDH11 | --> | PLS3      |
| CDH11 | --> | PMP22     |
| CEBPD | --> | FGF7      |
| CEBPD | --> | GLUL      |
| CEBPD | --> | NCOA7     |
| CES1  | --> | A2M       |
| CES1  | --> | ALCAM     |

|        |     |          |
|--------|-----|----------|
| CES1   | --> | CFD      |
| CES1   | --> | CYP27A1  |
| CES1   | --> | CYR61    |
| CES1   | --> | RNF145   |
| CES1   | --> | SERPING1 |
| CFD    | --> | ALCAM    |
| CFD    | --> | CALM2    |
| CFD    | --> | DAB2     |
| CFD    | --> | FAM129B  |
| CFD    | --> | FBXO32   |
| CFD    | --> | IGFBP2   |
| CFD    | --> | RARRES1  |
| CFD    | --> | SERPING1 |
| CFH    | --> | ACP5     |
| CFH    | --> | BRI3     |
| CFH    | --> | C3       |
| CFH    | --> | CSTB     |
| CFH    | --> | CYR61    |
| CFH    | --> | EGFR     |
| CFH    | --> | LAPTM5   |
| CFH    | --> | MAGI3    |
| CFH    | --> | MEG3     |
| CFH    | --> | PCYOX1   |
| CFH    | --> | RARRES1  |
| CFH    | --> | TIMP1    |
| CFH    | --> | TSPAN8   |
| CFH    | --> | VCAN     |
| CHI3L2 | --> | A2M      |
| CHI3L2 | --> | CA2      |
| CHI3L2 | --> | CCL20    |
| CHI3L2 | --> | CYBA     |
| CHI3L2 | --> | FGF7     |
| CHI3L2 | --> | HHIP     |
| CHI3L2 | --> | HPCAL1   |
| CHI3L2 | --> | KRT15    |
| CHI3L2 | --> | MBIP     |
| CHI3L2 | --> | MLPH     |
| CHI3L2 | --> | MSMO1    |
| CHI3L2 | --> | MYC      |
| CHI3L2 | --> | NNMT     |
| CHI3L2 | --> | ODC1     |
| CHI3L2 | --> | PEBP4    |

|        |     |           |
|--------|-----|-----------|
| CHI3L2 | --> | PGC       |
| CHI3L2 | --> | PLA2G1B   |
| CHI3L2 | --> | RPS4Y1    |
| CHI3L2 | --> | SERPING1  |
| CHI3L2 | --> | SFTPD     |
| CHI3L2 | --> | SGK1      |
| CHI3L2 | --> | SH3BGRL3  |
| CHI3L2 | --> | SLC6A14   |
| CHI3L2 | --> | SPARC     |
| CHI3L2 | --> | SPTSSA    |
| CHI3L2 | --> | SYTL1     |
| CHI3L2 | --> | TIMP1     |
| CHI3L2 | --> | TMEM243   |
| CHI3L2 | --> | TSPAN1    |
| CHI3L2 | --> | ZDHHC3    |
| CKB    | --> | ATP1A1    |
| CKB    | --> | TACC2     |
| CLDN1  | --> | CKB       |
| CLDN1  | --> | CYR61     |
| CLDN1  | --> | LDLR      |
| CLDN1  | --> | PRKCZ     |
| CLDN1  | --> | SCNN1A    |
| CLDN3  | --> | ARFGEF3   |
| CLDN3  | --> | CAPN8     |
| CLDN3  | --> | CRACR2B   |
| CLDN3  | --> | ERBB3     |
| CLDN3  | --> | FAM129B   |
| CLDN3  | --> | FOSB      |
| CLDN3  | --> | HES1      |
| CLDN3  | --> | IER3      |
| CLDN3  | --> | KIAA1324  |
| CLDN3  | --> | MAGI3     |
| CLDN3  | --> | MLPH      |
| CLDN3  | --> | PARM1     |
| CLDN3  | --> | RAB11FIP1 |
| CLDN3  | --> | SCNN1A    |
| CLDN3  | --> | SCNN1B    |
| CLDN3  | --> | TACC2     |
| CLDN3  | --> | TMC5      |
| CLIC3  | --> | AGR3      |
| CLIC3  | --> | ASAH1     |
| CLIC3  | --> | CAV1      |

|         |     |          |
|---------|-----|----------|
| CLIC3   | --> | CD9      |
| CLIC3   | --> | CKB      |
| CLIC3   | --> | MYL12B   |
| CLIC3   | --> | S100A11  |
| CLIC3   | --> | SEPP1    |
| CLIC3   | --> | TIMP3    |
| CLIC5   | --> | AGER     |
| CLIC5   | --> | ARHGEF26 |
| CLIC5   | --> | CLDN3    |
| CLIC5   | --> | COL4A3   |
| CLIC5   | --> | CP       |
| CLIC5   | --> | CTSE     |
| CLIC5   | --> | FSTL1    |
| CLIC5   | --> | GGTLC1   |
| CLIC5   | --> | MAGI3    |
| CLIC5   | --> | MLLT4    |
| CLIC5   | --> | NCKAP5   |
| CLIC5   | --> | PEG10    |
| CLIC5   | --> | PRKCZ    |
| CLIC5   | --> | SEMA3B   |
| CLIC5   | --> | SLC22A31 |
| CLIC5   | --> | SUSD2    |
| CLIC5   | --> | TSPAN1   |
| CLIC5   | --> | WIF1     |
| COL14A1 | --> | CCDC80   |
| COL14A1 | --> | EFEMP1   |
| COL14A1 | --> | ELN      |
| COL14A1 | --> | MOXD1    |
| COL14A1 | --> | TGFBI    |
| COL1A1  | --> | CALD1    |
| COL1A1  | --> | FHL2     |
| COL1A1  | --> | FSTL1    |
| COL1A1  | --> | GEM      |
| COL1A1  | --> | GLUL     |
| COL1A1  | --> | MDK      |
| COL1A1  | --> | MEG3     |
| COL1A1  | --> | RPS4Y1   |
| COL1A1  | --> | SCGB1A1  |
| COL1A1  | --> | SERPINH1 |
| COL1A1  | --> | SPARC    |
| COL1A1  | --> | TPM2     |
| COL1A2  | --> | ANXA3    |

|        |     |          |
|--------|-----|----------|
| COL1A2 | --> | C1S      |
| COL1A2 | --> | COL1A1   |
| COL1A2 | --> | COL3A1   |
| COL1A2 | --> | COL5A1   |
| COL1A2 | --> | COL5A2   |
| COL1A2 | --> | COL6A1   |
| COL1A2 | --> | COL6A2   |
| COL1A2 | --> | COL6A3   |
| COL1A2 | --> | CTHRC1   |
| COL1A2 | --> | IGF1     |
| COL1A2 | --> | LGALS1   |
| COL1A2 | --> | LUM      |
| COL1A2 | --> | NBL1     |
| COL1A2 | --> | SPARC    |
| COL1A2 | --> | THY1     |
| COL3A1 | --> | C1R      |
| COL3A1 | --> | COL1A1   |
| COL3A1 | --> | COL5A1   |
| COL3A1 | --> | COL5A2   |
| COL3A1 | --> | CTHRC1   |
| COL3A1 | --> | EMILIN1  |
| COL3A1 | --> | MMP2     |
| COL3A1 | --> | MOXD1    |
| COL3A1 | --> | POSTN    |
| COL3A1 | --> | SPARC    |
| COL3A1 | --> | THY1     |
| COL4A3 | --> | AGER     |
| COL4A3 | --> | ARHGEF26 |
| COL4A3 | --> | CACNA2D2 |
| COL4A3 | --> | DAPK2    |
| COL4A3 | --> | DUSP23   |
| COL4A3 | --> | GGTLC1   |
| COL4A3 | --> | LAMA3    |
| COL4A3 | --> | LPCAT1   |
| COL4A3 | --> | NCKAP5   |
| COL4A3 | --> | PSAP     |
| COL4A3 | --> | SERPING1 |
| COL4A3 | --> | SUSD2    |
| COL4A4 | --> | ABCA7    |
| COL4A4 | --> | ARHGEF26 |
| COL4A4 | --> | CLIC5    |
| COL4A4 | --> | COL1A1   |

|        |     |         |
|--------|-----|---------|
| COL4A4 | --> | COL4A3  |
| COL4A4 | --> | CST6    |
| COL4A4 | --> | CTSE    |
| COL4A4 | --> | FMO2    |
| COL4A4 | --> | GSTA1   |
| COL4A4 | --> | HHIP    |
| COL4A4 | --> | LAMA3   |
| COL4A4 | --> | MYRF    |
| COL4A4 | --> | NTM     |
| COL4A4 | --> | PLA2G1B |
| COL4A4 | --> | RAB17   |
| COL4A4 | --> | SCEL    |
| COL4A4 | --> | SEMA3B  |
| COL4A4 | --> | SYT8    |
| COL4A4 | --> | TNNC1   |
| COL5A1 | --> | AGR2    |
| COL5A1 | --> | AK1     |
| COL5A1 | --> | APOD    |
| COL5A1 | --> | CCDC80  |
| COL5A1 | --> | CCL18   |
| COL5A1 | --> | CES1    |
| COL5A1 | --> | CLIC3   |
| COL5A1 | --> | COL1A1  |
| COL5A1 | --> | COL8A1  |
| COL5A1 | --> | CSTB    |
| COL5A1 | --> | CTSH    |
| COL5A1 | --> | CYR61   |
| COL5A1 | --> | DAPK2   |
| COL5A1 | --> | EMILIN1 |
| COL5A1 | --> | FSTL1   |
| COL5A1 | --> | IGFBP5  |
| COL5A1 | --> | KRT15   |
| COL5A1 | --> | MDK     |
| COL5A1 | --> | MEG3    |
| COL5A1 | --> | MPZL2   |
| COL5A1 | --> | PGC     |
| COL5A1 | --> | PLEKHJ1 |
| COL5A1 | --> | PLLP    |
| COL5A1 | --> | RTKN2   |
| COL5A1 | --> | SCGB3A1 |
| COL5A1 | --> | SDC4    |
| COL5A1 | --> | SFTPD   |

|        |     |         |
|--------|-----|---------|
| COL5A1 | --> | SPARC   |
| COL5A1 | --> | TAGLN   |
| COL5A1 | --> | TIMP1   |
| COL5A1 | --> | TMEM45A |
| COL5A1 | --> | WFDC2   |
| COL5A2 | --> | COL14A1 |
| COL5A2 | --> | COL1A1  |
| COL5A2 | --> | COL5A1  |
| COL5A2 | --> | COL8A1  |
| COL5A2 | --> | CTHRC1  |
| COL5A2 | --> | CYP1B1  |
| COL5A2 | --> | DAPK2   |
| COL5A2 | --> | EMILIN1 |
| COL5A2 | --> | FBN1    |
| COL5A2 | --> | FSTL1   |
| COL5A2 | --> | ISLR    |
| COL5A2 | --> | MEG3    |
| COL5A2 | --> | NTM     |
| COL5A2 | --> | POSTN   |
| COL5A2 | --> | RTKN2   |
| COL5A2 | --> | SYTL1   |
| COL5A2 | --> | TMEM45A |
| COL6A1 | --> | COL1A1  |
| COL6A1 | --> | COL3A1  |
| COL6A1 | --> | COL5A1  |
| COL6A1 | --> | COL5A2  |
| COL6A1 | --> | CTSK    |
| COL6A1 | --> | ISLR    |
| COL6A2 | --> | C1R     |
| COL6A2 | --> | C1S     |
| COL6A2 | --> | CLIC5   |
| COL6A2 | --> | COL6A1  |
| COL6A2 | --> | COL6A3  |
| COL6A2 | --> | DPT     |
| COL6A2 | --> | EMILIN1 |
| COL6A2 | --> | FBLN1   |
| COL6A2 | --> | HTRA3   |
| COL6A2 | --> | MMP2    |
| COL6A2 | --> | MXRA8   |
| COL6A2 | --> | NBL1    |
| COL6A2 | --> | OLFML3  |
| COL6A2 | --> | PDLIM3  |



|        |     |          |
|--------|-----|----------|
| COL6A2 | --> | PSAP     |
| COL6A2 | --> | RARRES2  |
| COL6A2 | --> | SCEL     |
| COL6A2 | --> | SERPING1 |
| COL6A2 | --> | THY1     |
| COL6A3 | --> | CDH11    |
| COL6A3 | --> | CFH      |
| COL6A3 | --> | COL3A1   |
| COL6A3 | --> | COL5A1   |
| COL6A3 | --> | COL5A2   |
| COL6A3 | --> | COL6A1   |
| COL6A3 | --> | CTHRC1   |
| COL6A3 | --> | EMILIN1  |
| COL6A3 | --> | FBLN1    |
| COL6A3 | --> | FBN1     |
| COL6A3 | --> | FHL1     |
| COL6A3 | --> | GEM      |
| COL6A3 | --> | IGF1     |
| COL6A3 | --> | ISLR     |
| COL6A3 | --> | LTBP1    |
| COL6A3 | --> | LTBP2    |
| COL6A3 | --> | MMP2     |
| COL6A3 | --> | MXRA8    |
| COL6A3 | --> | NTM      |
| COL6A3 | --> | PDLIM2   |
| COL6A3 | --> | PDLIM3   |
| COL6A3 | --> | POSTN    |
| COL6A3 | --> | SELM     |
| COL6A3 | --> | THY1     |
| COL6A3 | --> | TPM2     |
| COL6A3 | --> | VCAN     |
| COL8A1 | --> | CCDC80   |
| COL8A1 | --> | CES1     |
| COL8A1 | --> | CHI3L2   |
| COL8A1 | --> | COX6C    |
| COL8A1 | --> | MOXD1    |
| COL8A1 | --> | NGFRAP1  |
| COL8A1 | --> | PLD3     |
| COL8A1 | --> | PLLP     |
| COL8A1 | --> | PLS3     |
| COL8A1 | --> | TREM2    |
| COL8A1 | --> | VCAN     |

|       |     |          |
|-------|-----|----------|
| COMP  | --> | AEBP1    |
| COMP  | --> | APOE     |
| COMP  | --> | ASPN     |
| COMP  | --> | BGN      |
| COMP  | --> | C10orf10 |
| COMP  | --> | C7       |
| COMP  | --> | CALD1    |
| COMP  | --> | CAV1     |
| COMP  | --> | CD9      |
| COMP  | --> | CDH11    |
| COMP  | --> | COL8A1   |
| COMP  | --> | DPT      |
| COMP  | --> | FBLN1    |
| COMP  | --> | LTBP2    |
| COMP  | --> | MFAP4    |
| COMP  | --> | NBL1     |
| COMP  | --> | PRELP    |
| COMP  | --> | SFRP2    |
| COMP  | --> | SFRP4    |
| COMP  | --> | TCF21    |
| COMP  | --> | THY1     |
| COMP  | --> | TSC22D1  |
| COX6C | --> | CALM2    |
| COX6C | --> | POLR2L   |
| CP    | --> | AGER     |
| CP    | --> | AGR2     |
| CP    | --> | AGR3     |
| CP    | --> | ALCAM    |
| CP    | --> | ARFGEF3  |
| CP    | --> | BPIFB1   |
| CP    | --> | CA2      |
| CP    | --> | CAPN8    |
| CP    | --> | CCDC80   |
| CP    | --> | CD55     |
| CP    | --> | CFH      |
| CP    | --> | CRACR2B  |
| CP    | --> | CTSB     |
| CP    | --> | CXCL1    |
| CP    | --> | FBXO32   |
| CP    | --> | FGFBP1   |
| CP    | --> | FMO2     |
| CP    | --> | HMGB3    |

|         |     |               |
|---------|-----|---------------|
| CP      | --> | KIAA1324      |
| CP      | --> | LGMN          |
| CP      | --> | PGC           |
| CP      | --> | SCD           |
| CP      | --> | SCGB1A1       |
| CP      | --> | SCGB3A1       |
| CP      | --> | SH3BGRL3      |
| CP      | --> | TFF3          |
| CP      | --> | TMC5          |
| CP      | --> | TSPAN1        |
| CP      | --> | TSPAN8        |
| CP      | --> | WFDC2         |
| CPM     | --> | ANKRD29       |
| CPM     | --> | ANOS1         |
| CPM     | --> | APLP2         |
| CPM     | --> | CAV1          |
| CPM     | --> | NEAT1         |
| CPM     | --> | TMEM45A       |
| CRACR2B | --> | ALCAM         |
| CRACR2B | --> | VSIG2         |
| CRNDE   | --> | EVA1A         |
| CRNDE   | --> | LDLR          |
| CRNDE   | --> | LMO3          |
| CRNDE   | --> | MT.ND1        |
| CRNDE   | --> | NCOA7         |
| CRNDE   | --> | RAB17         |
| CRNDE   | --> | RP11.532F12.5 |
| CRNDE   | --> | SCNN1A        |
| CRNDE   | --> | VSIG2         |
| CST6    | --> | CD24          |
| CST6    | --> | CLDN3         |
| CST6    | --> | RARRES1       |
| CST6    | --> | TSPAN1        |
| CSTB    | --> | APOE          |
| CSTB    | --> | ATP6V0B       |
| CSTB    | --> | ATP6V1F       |
| CSTB    | --> | BCAM          |
| CSTB    | --> | BRI3          |
| CSTB    | --> | CALM3         |
| CSTB    | --> | COX6C         |
| CSTB    | --> | FABP5         |
| CSTB    | --> | FBP1          |

|        |     |           |
|--------|-----|-----------|
| CSTB   | --> | LGALS3    |
| CSTB   | --> | LINC01272 |
| CSTB   | --> | MT.ND1    |
| CSTB   | --> | POLR2L    |
| CSTB   | --> | SERPING1  |
| CSTB   | --> | SFRP4     |
| CTGF   | --> | CYR61     |
| CTGF   | --> | FMO2      |
| CTGF   | --> | FOSB      |
| CTGF   | --> | HES1      |
| CTGF   | --> | HSPA1A    |
| CTGF   | --> | SOX9      |
| CTHRC1 | --> | ADH1B     |
| CTHRC1 | --> | CALD1     |
| CTHRC1 | --> | COL1A1    |
| CTHRC1 | --> | COL5A1    |
| CTHRC1 | --> | CYP1B1    |
| CTHRC1 | --> | EMILIN1   |
| CTHRC1 | --> | FBLN2     |
| CTHRC1 | --> | GLUL      |
| CTHRC1 | --> | IGFBP2    |
| CTHRC1 | --> | MGLL      |
| CTHRC1 | --> | MXRA8     |
| CTHRC1 | --> | MYL9      |
| CTHRC1 | --> | PDLIM2    |
| CTHRC1 | --> | POSTN     |
| CTHRC1 | --> | SERPINH1  |
| CTHRC1 | --> | SFRP2     |
| CTHRC1 | --> | TAGLN     |
| CTHRC1 | --> | TCF21     |
| CTHRC1 | --> | TPM2      |
| CTSB   | --> | BRI3      |
| CTSB   | --> | CAV1      |
| CTSB   | --> | CCL18     |
| CTSB   | --> | CSTB      |
| CTSB   | --> | CTSL      |
| CTSB   | --> | CTSS      |
| CTSB   | --> | CTSZ      |
| CTSB   | --> | DAB2      |
| CTSB   | --> | GLUL      |
| CTSB   | --> | GPNMB     |
| CTSB   | --> | LAPTM5    |

|      |     |         |
|------|-----|---------|
| CTSB | --> | LGALS1  |
| CTSB | --> | LGMN    |
| CTSB | --> | MBIP    |
| CTSB | --> | MFSD1   |
| CTSB | --> | PPA1    |
| CTSB | --> | PSAP    |
| CTSB | --> | RNF130  |
| CTSB | --> | SPP1    |
| CTSB | --> | TGFBI   |
| CTSD | --> | ACTB    |
| CTSD | --> | AGR2    |
| CTSD | --> | APLP2   |
| CTSD | --> | ASAH1   |
| CTSD | --> | CAPG    |
| CTSD | --> | CREG1   |
| CTSD | --> | CTSB    |
| CTSD | --> | CTSH    |
| CTSD | --> | CTSL    |
| CTSD | --> | CTSS    |
| CTSD | --> | CYBA    |
| CTSD | --> | GCHFR   |
| CTSD | --> | GLUL    |
| CTSD | --> | GPNMB   |
| CTSD | --> | H2AFY   |
| CTSD | --> | LAPTM5  |
| CTSD | --> | LGALS3  |
| CTSD | --> | MRC1    |
| CTSD | --> | PSAP    |
| CTSD | --> | RPS4Y1  |
| CTSD | --> | SDC2    |
| CTSE | --> | ADGRF5  |
| CTSE | --> | AGR3    |
| CTSE | --> | ALPL    |
| CTSE | --> | ARFGEF3 |
| CTSE | --> | ATP11A  |
| CTSE | --> | BCAM    |
| CTSE | --> | CADM1   |
| CTSE | --> | CD151   |
| CTSE | --> | CD47    |
| CTSE | --> | CDH1    |
| CTSE | --> | CLIC3   |
| CTSE | --> | CST6    |

|      |     |         |
|------|-----|---------|
| CTSE | --> | CXCL1   |
| CTSE | --> | CXCL14  |
| CTSE | --> | CYP4B1  |
| CTSE | --> | DSTN    |
| CTSE | --> | FLRT3   |
| CTSE | --> | GSN     |
| CTSE | --> | HES1    |
| CTSE | --> | HSPA1A  |
| CTSE | --> | LMO3    |
| CTSE | --> | MAGI3   |
| CTSE | --> | MBIP    |
| CTSE | --> | MT.ND1  |
| CTSE | --> | NNMT    |
| CTSE | --> | OCIAD2  |
| CTSE | --> | PCYOX1  |
| CTSE | --> | SCGB3A2 |
| CTSE | --> | SCNN1B  |
| CTSE | --> | SEMA3B  |
| CTSE | --> | SFTPC   |
| CTSE | --> | SMIM22  |
| CTSE | --> | TRAM1   |
| CTSE | --> | WIF1    |
| CTSH | --> | ASAH1   |
| CTSH | --> | BLVRB   |
| CTSH | --> | CD63    |
| CTSH | --> | HLA.DMA |
| CTSH | --> | PLD3    |
| CTSH | --> | PPA1    |
| CTSK | --> | ANKRD29 |
| CTSK | --> | GPNMB   |
| CTSK | --> | LILRB4  |
| CTSK | --> | LY96    |
| CTSK | --> | MT.ND1  |
| CTSK | --> | MYL9    |
| CTSK | --> | RAB25   |
| CTSK | --> | RARRES1 |
| CTSK | --> | SDC2    |
| CTSL | --> | APOC1   |
| CTSL | --> | CCL18   |
| CTSL | --> | CD63    |
| CTSL | --> | CSTB    |
| CTSL | --> | EMP3    |

|        |     |         |
|--------|-----|---------|
| CTSL   | --> | FABP5   |
| CTSL   | --> | GPNMB   |
| CTSL   | --> | GSTO1   |
| CTSL   | --> | HEXB    |
| CTSL   | --> | LGALS3  |
| CTSL   | --> | LGMN    |
| CTSL   | --> | MARCO   |
| CTSL   | --> | MSMO1   |
| CTSL   | --> | PLA2G7  |
| CTSL   | --> | PMP22   |
| CTSL   | --> | PSAP    |
| CTSL   | --> | SDC2    |
| CTSL   | --> | SNHG8   |
| CTSL   | --> | TYMP    |
| CTSS   | --> | APOC1   |
| CTSS   | --> | APOE    |
| CTSS   | --> | ASAH1   |
| CTSS   | --> | GPNMB   |
| CTSS   | --> | GRN     |
| CTSS   | --> | LIPA    |
| CTSS   | --> | LY96    |
| CTSS   | --> | PSAP    |
| CTSZ   | --> | CALM3   |
| CTSZ   | --> | DAB2    |
| CTSZ   | --> | LGMN    |
| CXADR  | --> | NCOA7   |
| CXCL1  | --> | NCOA7   |
| CXCL1  | --> | TMEM45A |
| CXCL12 | --> | COL14A1 |
| CXCL12 | --> | FSTL1   |
| CXCL12 | --> | GSN     |
| CXCL12 | --> | IGFBP4  |
| CXCL12 | --> | NNMT    |
| CXCL12 | --> | OLFML3  |
| CXCL12 | --> | SFRP4   |
| CXCL14 | --> | APOD    |
| CXCL14 | --> | C3      |
| CXCL14 | --> | SFRP4   |
| CXCL2  | --> | CXCL1   |
| CXCL2  | --> | ETS2    |
| CXCL2  | --> | FOSB    |
| CXCL2  | --> | GSN     |

|         |     |         |
|---------|-----|---------|
| CXCL2   | --> | GSTO1   |
| CXCL2   | --> | HSPA1A  |
| CXCL2   | --> | IER3    |
| CXCL2   | --> | LDLR    |
| CXCL2   | --> | MYC     |
| CXCL2   | --> | SDC4    |
| CXCL2   | --> | TFRC    |
| CXCL2   | --> | TRIB1   |
| CYBA    | --> | DSTN    |
| CYBA    | --> | GRN     |
| CYBA    | --> | NEAT1   |
| CYBA    | --> | NNMT    |
| CYBA    | --> | ODC1    |
| CYBA    | --> | SPTSSA  |
| CYBA    | --> | TSC22D1 |
| CYBB    | --> | FBP1    |
| CYBB    | --> | IGSF6   |
| CYBB    | --> | MRC1    |
| CYP1B1  | --> | ABCA3   |
| CYP1B1  | --> | ANXA3   |
| CYP1B1  | --> | CAV2    |
| CYP1B1  | --> | COL8A1  |
| CYP1B1  | --> | CTSD    |
| CYP1B1  | --> | CTSE    |
| CYP1B1  | --> | CTSS    |
| CYP1B1  | --> | CXCL14  |
| CYP1B1  | --> | FHL2    |
| CYP1B1  | --> | HHIP    |
| CYP1B1  | --> | IGFBP5  |
| CYP1B1  | --> | ITGA2   |
| CYP1B1  | --> | LRRK2   |
| CYP1B1  | --> | PLA2G1B |
| CYP1B1  | --> | RTKN2   |
| CYP1B1  | --> | SLC6A14 |
| CYP1B1  | --> | SNHG8   |
| CYP1B1  | --> | WFDC2   |
| CYP27A1 | --> | ACTB    |
| CYP27A1 | --> | ANKRD29 |
| CYP27A1 | --> | GRN     |
| CYP27A1 | --> | RARRES3 |
| CYP4B1  | --> | CD55    |
| CYP4B1  | --> | CYR61   |



|        |     |         |
|--------|-----|---------|
| CYP4B1 | --> | RARRES3 |
| CYR61  | --> | ACTB    |
| CYR61  | --> | ATF3    |
| CYR61  | --> | FOSB    |
| CYR61  | --> | HSPA1A  |
| CYR61  | --> | MDK     |
| CYR61  | --> | MYO1B   |
| CYR61  | --> | TRIB1   |
| DAB2   | --> | CPM     |
| DAB2   | --> | LIMS1   |
| DAPK2  | --> | ADGRF5  |
| DAPK2  | --> | AGER    |
| DAPK2  | --> | ARL4D   |
| DAPK2  | --> | BCAM    |
| DAPK2  | --> | CD24    |
| DAPK2  | --> | CHI3L2  |
| DAPK2  | --> | COL14A1 |
| DAPK2  | --> | CYP1B1  |
| DAPK2  | --> | CYP4B1  |
| DAPK2  | --> | GGTLC1  |
| DAPK2  | --> | HTRA3   |
| DAPK2  | --> | LAMB3   |
| DAPK2  | --> | LTBP2   |
| DAPK2  | --> | LTBP4   |
| DAPK2  | --> | MARCO   |
| DAPK2  | --> | PLL     |
| DAPK2  | --> | PLS3    |
| DAPK2  | --> | RPS4Y1  |
| DAPK2  | --> | RTKN2   |
| DAPK2  | --> | SFTPC   |
| DCN    | --> | ADH1B   |
| DCN    | --> | CALD1   |
| DCN    | --> | CFD     |
| DCN    | --> | COL5A2  |
| DCN    | --> | CTHRC1  |
| DCN    | --> | IGFBP5  |
| DCN    | --> | LUM     |
| DCN    | --> | MFAP4   |
| DCN    | --> | MGP     |
| DCN    | --> | NNMT    |
| DCN    | --> | PLAC9   |
| DCN    | --> | PLL     |

|       |     |          |
|-------|-----|----------|
| DCN   | --> | PRELP    |
| DCN   | --> | PTGDS    |
| DCN   | --> | SFRP2    |
| DCN   | --> | SPARCL1  |
| DCN   | --> | TIMP3    |
| DHRS3 | --> | SCPEP1   |
| DKK3  | --> | APOD     |
| DKK3  | --> | C3       |
| DKK3  | --> | CAV1     |
| DKK3  | --> | CAV2     |
| DKK3  | --> | CCDC80   |
| DKK3  | --> | GPC3     |
| DKK3  | --> | LTBP4    |
| DKK3  | --> | PLS3     |
| DMBT1 | --> | ALPL     |
| DMBT1 | --> | C3       |
| DMBT1 | --> | CAV1     |
| DMBT1 | --> | CTGF     |
| DMBT1 | --> | MFSD2A   |
| DMBT1 | --> | SCGB1A1  |
| DMBT1 | --> | SLC22A31 |
| DPT   | --> | CALD1    |
| DPT   | --> | CTSK     |
| DPT   | --> | CYR61    |
| DPT   | --> | FBLN1    |
| DPT   | --> | FBLN2    |
| DPT   | --> | FBN1     |
| DPT   | --> | IGF1     |
| DPT   | --> | ISLR     |
| DPT   | --> | LTBP1    |
| DPT   | --> | PLAC9    |
| DPT   | --> | PTGDS    |
| DPT   | --> | TGFBI    |
| DPT   | --> | TSPAN8   |
| DSTN  | --> | CALM2    |
| DSTN  | --> | CAPN2    |
| DSTN  | --> | CD9      |
| DSTN  | --> | MYL12B   |
| DSTN  | --> | NGFRAP1  |
| DSTN  | --> | PDLIM2   |
| DSTN  | --> | POLR2L   |
| DUSP6 | --> | CYR61    |

|         |     |          |
|---------|-----|----------|
| DUSP6   | --> | MFSD2A   |
| DUSP6   | --> | TRIB1    |
| EFEMP1  | --> | ANXA3    |
| EFEMP1  | --> | ATP6V0B  |
| EFEMP1  | --> | C3       |
| EFEMP1  | --> | CAV2     |
| EFEMP1  | --> | CCDC80   |
| EFEMP1  | --> | CFH      |
| EFEMP1  | --> | EGFR     |
| EFEMP1  | --> | LILRB4   |
| EFEMP1  | --> | LTBP4    |
| EFEMP1  | --> | MEG3     |
| EFEMP1  | --> | MYC      |
| EFEMP1  | --> | PLL      |
| EFEMP1  | --> | PLS3     |
| EFEMP1  | --> | RPS4Y1   |
| EFEMP1  | --> | SEPP1    |
| EFEMP1  | --> | TSC22D1  |
| EGFR    | --> | LTBP4    |
| EGFR    | --> | MLLT4    |
| ELN     | --> | FHL1     |
| EMILIN1 | --> | CD55     |
| EMILIN1 | --> | CDH11    |
| EMILIN1 | --> | CXCL14   |
| EMILIN1 | --> | GEM      |
| EMILIN1 | --> | IGF1     |
| EMILIN1 | --> | PLAC9    |
| EMILIN1 | --> | RAB25    |
| EMILIN1 | --> | RARRES1  |
| EMILIN1 | --> | TCF21    |
| EMP3    | --> | CFD      |
| EMP3    | --> | CSTB     |
| EMP3    | --> | CYBA     |
| EMP3    | --> | FAM213A  |
| EMP3    | --> | GSTO1    |
| EMP3    | --> | HLA.DMB  |
| EMP3    | --> | LGALS1   |
| EMP3    | --> | NGFRAP1  |
| EMP3    | --> | S100A11  |
| EMP3    | --> | SDC2     |
| EMP3    | --> | SERPINA1 |
| EMP3    | --> | TYMP     |

|         |     |         |
|---------|-----|---------|
| EMP3    | --> | VIM     |
| ERBB3   | --> | CRACR2B |
| ETS2    | --> | CEBPD   |
| ETS2    | --> | DUSP6   |
| ETS2    | --> | IER3    |
| ETS2    | --> | KRT15   |
| ETS2    | --> | LGALS1  |
| ETS2    | --> | MPZL2   |
| ETS2    | --> | MYC     |
| ETS2    | --> | NEAT1   |
| ETS2    | --> | TRIB1   |
| EVA1A   | --> | AK1     |
| EVA1A   | --> | FAM129B |
| EVA1A   | --> | PARM1   |
| FABP5   | --> | CD24    |
| FABP5   | --> | CD47    |
| FABP5   | --> | GRN     |
| FABP5   | --> | RARRES3 |
| FABP5   | --> | SCGB3A2 |
| FABP5   | --> | SPP1    |
| FAM129B | --> | CAPN2   |
| FAM213A | --> | SPINT1  |
| FAM213A | --> | TSC22D1 |
| FASN    | --> | SCD     |
| FBLN1   | --> | ADH1B   |
| FBLN1   | --> | APOD    |
| FBLN1   | --> | C7      |
| FBLN1   | --> | CCDC80  |
| FBLN1   | --> | COL5A1  |
| FBLN1   | --> | COL5A2  |
| FBLN1   | --> | CTHRC1  |
| FBLN1   | --> | DCN     |
| FBLN1   | --> | DKK3    |
| FBLN1   | --> | EFEMP1  |
| FBLN1   | --> | FBLN2   |
| FBLN1   | --> | FSTL1   |
| FBLN1   | --> | GLUL    |
| FBLN1   | --> | GSN     |
| FBLN1   | --> | HTRA3   |
| FBLN1   | --> | IGFBP4  |
| FBLN1   | --> | ISLR    |
| FBLN1   | --> | LTBP4   |

|       |     |          |
|-------|-----|----------|
| FBLN1 | --> | LUM      |
| FBLN1 | --> | MFAP4    |
| FBLN1 | --> | MMP2     |
| FBLN1 | --> | MYC      |
| FBLN1 | --> | POSTN    |
| FBLN1 | --> | PRELP    |
| FBLN1 | --> | SFRP2    |
| FBLN1 | --> | SPARCL1  |
| FBLN1 | --> | TYMP     |
| FBLN2 | --> | APOD     |
| FBLN2 | --> | ARHGEF26 |
| FBLN2 | --> | C3       |
| FBLN2 | --> | CFD      |
| FBLN2 | --> | CXCL14   |
| FBLN2 | --> | EFEMP1   |
| FBLN2 | --> | FBN1     |
| FBLN2 | --> | FGF7     |
| FBLN2 | --> | FSTL1    |
| FBLN2 | --> | GPC3     |
| FBLN2 | --> | GSN      |
| FBLN2 | --> | IGF1     |
| FBLN2 | --> | IGFBP4   |
| FBLN2 | --> | LGALS1   |
| FBLN2 | --> | LTBP1    |
| FBLN2 | --> | LTBP2    |
| FBLN2 | --> | LTBP4    |
| FBLN2 | --> | MXRA8    |
| FBLN2 | --> | PLAC9    |
| FBLN2 | --> | PMP22    |
| FBLN2 | --> | SFRP2    |
| FBLN2 | --> | TSPAN8   |
| FBN1  | --> | ELN      |
| FBN1  | --> | FSTL1    |
| FBN1  | --> | LTBP1    |
| FBN1  | --> | OLFML3   |
| FBN1  | --> | PPA1     |
| FBN1  | --> | SFRP4    |
| FBP1  | --> | APOE     |
| FBP1  | --> | C15orf48 |
| FBP1  | --> | CAPG     |
| FBP1  | --> | FBXO32   |
| FBP1  | --> | GSN      |

|        |     |           |
|--------|-----|-----------|
| FBP1   | --> | HPCAL1    |
| FBP1   | --> | HSPA1A    |
| FBP1   | --> | IER3      |
| FBP1   | --> | IGSF6     |
| FBP1   | --> | LG MN     |
| FBP1   | --> | LILRB4    |
| FBP1   | --> | LINC01272 |
| FBP1   | --> | LPL       |
| FBP1   | --> | MRC1      |
| FBP1   | --> | RAB11FIP1 |
| FBP1   | --> | SDC2      |
| FBP1   | --> | SERPINA1  |
| FBP1   | --> | SGMS2     |
| FBP1   | --> | TREM2     |
| FBXO32 | --> | ANOS1     |
| FBXO32 | --> | HPCAL1    |
| FBXO32 | --> | TSC22D1   |
| FCER1G | --> | ADGRF5    |
| FCER1G | --> | AGER      |
| FCER1G | --> | AP2S1     |
| FCER1G | --> | ATP6V0B   |
| FCER1G | --> | C15orf48  |
| FCER1G | --> | C1R       |
| FCER1G | --> | CAV2      |
| FCER1G | --> | CD163     |
| FCER1G | --> | CP        |
| FCER1G | --> | CTSB      |
| FCER1G | --> | CTSD      |
| FCER1G | --> | CTSL      |
| FCER1G | --> | CYBA      |
| FCER1G | --> | CYBB      |
| FCER1G | --> | DKK3      |
| FCER1G | --> | EMP3      |
| FCER1G | --> | FABP5     |
| FCER1G | --> | FHL2      |
| FCER1G | --> | FOLR2     |
| FCER1G | --> | FSTL1     |
| FCER1G | --> | GSTO1     |
| FCER1G | --> | HLA.DRB5  |
| FCER1G | --> | IFI6      |
| FCER1G | --> | IGSF6     |
| FCER1G | --> | LGALS1    |

|        |     |          |
|--------|-----|----------|
| FCER1G | --> | LST1     |
| FCER1G | --> | LY96     |
| FCER1G | --> | MARCO    |
| FCER1G | --> | MS4A4A   |
| FCER1G | --> | MS4A7    |
| FCER1G | --> | MSR1     |
| FCER1G | --> | PPT1     |
| FCER1G | --> | S100A11  |
| FCER1G | --> | SELM     |
| FCER1G | --> | SH3BGRL3 |
| FCER1G | --> | SPP1     |
| FCER1G | --> | TIMP1    |
| FCER1G | --> | TNNC1    |
| FCER1G | --> | TYMP     |
| FCER1G | --> | VSIG4    |
| FGFBP1 | --> | AGR3     |
| FGFBP1 | --> | C15orf48 |
| FGFBP1 | --> | CD24     |
| FGFBP1 | --> | CXCL1    |
| FGFBP1 | --> | LDLR     |
| FGFBP1 | --> | LGALS3   |
| FGFBP1 | --> | S100A11  |
| FGG    | --> | ABCA3    |
| FGG    | --> | ABCA7    |
| FGG    | --> | AEBP1    |
| FGG    | --> | ASPN     |
| FGG    | --> | BGN      |
| FGG    | --> | C10orf10 |
| FGG    | --> | C4BPA    |
| FGG    | --> | C7       |
| FGG    | --> | CA2      |
| FGG    | --> | CACNA2D2 |
| FGG    | --> | CD9      |
| FGG    | --> | CES1     |
| FGG    | --> | CHI3L2   |
| FGG    | --> | COL4A4   |
| FGG    | --> | COL8A1   |
| FGG    | --> | COMP     |
| FGG    | --> | CPM      |
| FGG    | --> | CYP1B1   |
| FGG    | --> | DMBT1    |
| FGG    | --> | FHL2     |

|       |     |          |
|-------|-----|----------|
| FGG   | --> | GSTA1    |
| FGG   | --> | HHIP     |
| FGG   | --> | IGFBP5   |
| FGG   | --> | INMT     |
| FGG   | --> | KRT6A    |
| FGG   | --> | LAMP3    |
| FGG   | --> | LRRK2    |
| FGG   | --> | MMP1     |
| FGG   | --> | MT.ND1   |
| FGG   | --> | MUC5B    |
| FGG   | --> | MYRF     |
| FGG   | --> | NEBL     |
| FGG   | --> | PLA2G1B  |
| FGG   | --> | PTGDS    |
| FGG   | --> | RAB17    |
| FGG   | --> | RTKN2    |
| FGG   | --> | S100A2   |
| FGG   | --> | SCGB1A1  |
| FGG   | --> | SERPINB5 |
| FGG   | --> | TMEM243  |
| FGG   | --> | TNNC1    |
| FHL1  | --> | ARL4D    |
| FHL1  | --> | CES1     |
| FHL1  | --> | CFD      |
| FHL2  | --> | APOC1    |
| FHL2  | --> | ARL4D    |
| FHL2  | --> | CAV2     |
| FHL2  | --> | CFH      |
| FHL2  | --> | CLIC3    |
| FHL2  | --> | CLTB     |
| FHL2  | --> | CTGF     |
| FHL2  | --> | CYR61    |
| FHL2  | --> | EFEMP1   |
| FHL2  | --> | ITGA2    |
| FHL2  | --> | KRT15    |
| FHL2  | --> | KRT17    |
| FHL2  | --> | LTBP1    |
| FHL2  | --> | MYL12B   |
| FHL2  | --> | S100A11  |
| FHL2  | --> | SPARC    |
| FHL2  | --> | TPM2     |
| FLRT3 | --> | CADM1    |



|       |     |           |
|-------|-----|-----------|
| FLRT3 | --> | CEBPD     |
| FLRT3 | --> | CXADR     |
| FLRT3 | --> | EGFR      |
| FLRT3 | --> | FMO2      |
| FLRT3 | --> | MBIP      |
| FMO2  | --> | CRACR2B   |
| FMO2  | --> | MFSD2A    |
| FMO2  | --> | SERPING1  |
| FMO2  | --> | TSC22D1   |
| FOLR2 | --> | ANKRD29   |
| FOLR2 | --> | ASPN      |
| FOLR2 | --> | BGN       |
| FOLR2 | --> | CCL18     |
| FOLR2 | --> | CD14      |
| FOLR2 | --> | CFD       |
| FOLR2 | --> | CTSK      |
| FOLR2 | --> | FBP1      |
| FOLR2 | --> | GGT1      |
| FOLR2 | --> | HSPA1A    |
| FOLR2 | --> | KRT6A     |
| FOLR2 | --> | LINC01272 |
| FOLR2 | --> | MERTK     |
| FOLR2 | --> | MMP1      |
| FOLR2 | --> | MMP2      |
| FOLR2 | --> | PLD3      |
| FOLR2 | --> | RTKN2     |
| FOLR2 | --> | SCGB1A1   |
| FOLR2 | --> | SEPP1     |
| FOLR2 | --> | SH3BGRL3  |
| FOLR2 | --> | SNHG8     |
| FOLR2 | --> | SPARC     |
| FOLR2 | --> | SPP1      |
| FOSB  | --> | A2M       |
| FOSB  | --> | ATF3      |
| FOSB  | --> | CD9       |
| FOSB  | --> | CEBPD     |
| FOSB  | --> | GEM       |
| FOSB  | --> | HES1      |
| FOSB  | --> | HSPA1A    |
| FOSB  | --> | IER3      |
| FOSB  | --> | MT.ND1    |
| FOSB  | --> | NEAT1     |

|       |     |           |
|-------|-----|-----------|
| FPR3  | --> | ANXA3     |
| FPR3  | --> | CTSB      |
| FPR3  | --> | CTSL      |
| FPR3  | --> | CTSZ      |
| FPR3  | --> | CYBB      |
| FPR3  | --> | FOLR2     |
| FPR3  | --> | GGT1      |
| FPR3  | --> | LST1      |
| FPR3  | --> | MERTK     |
| FPR3  | --> | SLC16A10  |
| FSTL1 | --> | CCDC80    |
| FSTL1 | --> | CD151     |
| FSTL1 | --> | CFH       |
| FSTL1 | --> | CXCL14    |
| FSTL1 | --> | EFEMP1    |
| FSTL1 | --> | FABP5     |
| FSTL1 | --> | FHL1      |
| FSTL1 | --> | FHL2      |
| FSTL1 | --> | MEG3      |
| FSTL1 | --> | PDLIM2    |
| FSTL1 | --> | SEMA3B    |
| FSTL1 | --> | SERPINH1  |
| FSTL1 | --> | TAGLN     |
| FSTL1 | --> | VCAN      |
| GCHFR | --> | APOC1     |
| GCHFR | --> | BRI3      |
| GCHFR | --> | CCL18     |
| GCHFR | --> | CEBPD     |
| GCHFR | --> | CSTB      |
| GCHFR | --> | GLUL      |
| GCHFR | --> | IFI6      |
| GCHFR | --> | LINC01272 |
| GCHFR | --> | PLD3      |
| GCHFR | --> | SCD       |
| GCHFR | --> | SEPP1     |
| GGT1  | --> | ABCA7     |
| GGT1  | --> | ASPN      |
| GGT1  | --> | COL4A4    |
| GGT1  | --> | COL5A1    |
| GGT1  | --> | COL6A3    |
| GGT1  | --> | CYBB      |
| GGT1  | --> | FGG       |

|        |     |          |
|--------|-----|----------|
| GGT1   | --> | HHIP     |
| GGT1   | --> | LGALS7B  |
| GGT1   | --> | MAP2     |
| GGT1   | --> | MMP1     |
| GGT1   | --> | MT.ND1   |
| GGT1   | --> | NEBL     |
| GGT1   | --> | NTM      |
| GGT1   | --> | PCOLCE   |
| GGT1   | --> | RTKN2    |
| GGT1   | --> | SERPINB5 |
| GGT1   | --> | SLC16A10 |
| GGT1   | --> | TNNC1    |
| GGTLC1 | --> | AGER     |
| GGTLC1 | --> | ARHGEF26 |
| GKN2   | --> | AGR2     |
| GKN2   | --> | ASAH1    |
| GKN2   | --> | CADM1    |
| GKN2   | --> | CD63     |
| GKN2   | --> | CTSE     |
| GKN2   | --> | MBIP     |
| GKN2   | --> | PEBP4    |
| GKN2   | --> | PEG10    |
| GKN2   | --> | PRKCZ    |
| GKN2   | --> | SFTPA1   |
| GKN2   | --> | SFTPD    |
| GKN2   | --> | WIF1     |
| GPC3   | --> | ANOS1    |
| GPC3   | --> | ARL4D    |
| GPC3   | --> | ELN      |
| GPC3   | --> | FGF7     |
| GPC3   | --> | FHL1     |
| GPC3   | --> | FMO2     |
| GPC3   | --> | MOXD1    |
| GPC3   | --> | SEPP1    |
| GPC3   | --> | SPTSSA   |
| GPC3   | --> | TYMP     |
| GPNMB  | --> | ACTB     |
| GPNMB  | --> | AGR2     |
| GPNMB  | --> | AK1      |
| GPNMB  | --> | APOE     |
| GPNMB  | --> | ASAH1    |
| GPNMB  | --> | ATOX1    |

|       |     |          |
|-------|-----|----------|
| GPNMB | --> | CALM3    |
| GPNMB | --> | CAPG     |
| GPNMB | --> | CFD      |
| GPNMB | --> | CPM      |
| GPNMB | --> | CREG1    |
| GPNMB | --> | CSTB     |
| GPNMB | --> | CYP27A1  |
| GPNMB | --> | CYR61    |
| GPNMB | --> | DAB2     |
| GPNMB | --> | ETS2     |
| GPNMB | --> | HEXB     |
| GPNMB | --> | HLA.DMB  |
| GPNMB | --> | IFI6     |
| GPNMB | --> | LGMM     |
| GPNMB | --> | LIPA     |
| GPNMB | --> | LY96     |
| GPNMB | --> | MFSD1    |
| GPNMB | --> | MPZL2    |
| GPNMB | --> | PDLIM2   |
| GPNMB | --> | PLA2G7   |
| GPNMB | --> | PPA1     |
| GPNMB | --> | PPT1     |
| GPNMB | --> | PSAP     |
| GPNMB | --> | RNF130   |
| GPNMB | --> | SCPEP1   |
| GPNMB | --> | SERPINA1 |
| GPNMB | --> | SERPINH1 |
| GPNMB | --> | SFTPD    |
| GPNMB | --> | SPP1     |
| GPNMB | --> | SPTSSA   |
| GPX1  | --> | APOC1    |
| GPX1  | --> | ATP6V1F  |
| GPX1  | --> | CAV1     |
| GPX1  | --> | CTSB     |
| GPX1  | --> | CTSD     |
| GPX1  | --> | CYBA     |
| GPX1  | --> | FBP1     |
| GPX1  | --> | H2AFY    |
| GPX1  | --> | LGALS1   |
| GPX1  | --> | MARCO    |
| GPX1  | --> | PSAP     |
| GPX1  | --> | S100A11  |

|       |     |          |
|-------|-----|----------|
| GPX1  | --> | SCGB3A1  |
| GPX1  | --> | SCGB3A2  |
| GRN   | --> | ATP6V1F  |
| GRN   | --> | HEXB     |
| GRN   | --> | PLD3     |
| GRN   | --> | PPT1     |
| GRN   | --> | TYMP     |
| GSN   | --> | ACTB     |
| GSN   | --> | ALCAM    |
| GSN   | --> | ATP1A1   |
| GSN   | --> | CD151    |
| GSN   | --> | CTNNA1   |
| GSN   | --> | PLD3     |
| GSN   | --> | SCPEP1   |
| GSTA1 | --> | BPIFB1   |
| GSTA1 | --> | CCDC80   |
| GSTA1 | --> | CD47     |
| GSTA1 | --> | CFH      |
| GSTA1 | --> | CHI3L2   |
| GSTA1 | --> | CLDN3    |
| GSTA1 | --> | COMP     |
| GSTA1 | --> | CP       |
| GSTA1 | --> | CPM      |
| GSTA1 | --> | CRACR2B  |
| GSTA1 | --> | CTSH     |
| GSTA1 | --> | CXCL14   |
| GSTA1 | --> | IGFBP5   |
| GSTA1 | --> | KIAA1324 |
| GSTA1 | --> | LAMP3    |
| GSTA1 | --> | LCN2     |
| GSTA1 | --> | LGALS3   |
| GSTA1 | --> | LPCAT1   |
| GSTA1 | --> | MDK      |
| GSTA1 | --> | MGP      |
| GSTA1 | --> | MUC5B    |
| GSTA1 | --> | RPS4Y1   |
| GSTA1 | --> | TFF3     |
| GSTA1 | --> | TMEM243  |
| GSTA1 | --> | TRAM1    |
| GSTA1 | --> | TSPAN1   |
| GSTA1 | --> | TSPAN8   |
| GSTO1 | --> | ATP6V0B  |

|          |     |          |
|----------|-----|----------|
| GSTO1    | --> | FABP5    |
| GSTO1    | --> | FBP1     |
| GSTO1    | --> | LGALS3   |
| GSTO1    | --> | S100A11  |
| H2AFY    | --> | ATP6V0B  |
| H2AFY    | --> | LIMS1    |
| HES1     | --> | TSC22D1  |
| HEXB     | --> | PPT1     |
| HEXB     | --> | SCPEP1   |
| HHIP     | --> | ALPL     |
| HHIP     | --> | C4BPA    |
| HHIP     | --> | CA2      |
| HHIP     | --> | CACNA2D2 |
| HHIP     | --> | CAPG     |
| HHIP     | --> | CLIC3    |
| HHIP     | --> | CTSE     |
| HHIP     | --> | FASN     |
| HHIP     | --> | FHL1     |
| HHIP     | --> | KRT17    |
| HHIP     | --> | LAMP3    |
| HHIP     | --> | LPL      |
| HHIP     | --> | MDK      |
| HHIP     | --> | MFSD2A   |
| HHIP     | --> | PARM1    |
| HHIP     | --> | PGC      |
| HHIP     | --> | PLA2G1B  |
| HHIP     | --> | SDR16C5  |
| HHIP     | --> | SLC22A31 |
| HHIP     | --> | SLC6A14  |
| HHIP     | --> | TSPAN1   |
| HHIP     | --> | WIF1     |
| HLA.DMB  | --> | ALPL     |
| HLA.DMB  | --> | CAPG     |
| HLA.DMB  | --> | CPM      |
| HLA.DMB  | --> | HLA.DMA  |
| HLA.DMB  | --> | IGSF6    |
| HLA.DMB  | --> | TREM2    |
| HLA.DPA1 | --> | A2M      |
| HLA.DPA1 | --> | BGN      |
| HLA.DPA1 | --> | CD163    |
| HLA.DPA1 | --> | CHI3L2   |
| HLA.DPA1 | --> | HLA.DMA  |

|          |     |          |
|----------|-----|----------|
| HLA.DPA1 | --> | HLA.DMB  |
| HLA.DPA1 | --> | HLA.DRB1 |
| HLA.DPA1 | --> | LGALS7B  |
| HLA.DPA1 | --> | MMP1     |
| HLA.DPA1 | --> | MS4A4A   |
| HLA.DPA1 | --> | RPS4Y1   |
| HLA.DPA1 | --> | SPP1     |
| HLA.DPB1 | --- | AIF1     |
| HLA.DPB1 | --- | C1QA     |
| HLA.DPB1 | --> | CCDC80   |
| HLA.DPB1 | --> | FOLR2    |
| HLA.DPB1 | --> | GPX1     |
| HLA.DPB1 | --> | HLA.DPA1 |
| HLA.DPB1 | --- | HLA.DQA1 |
| HLA.DPB1 | --> | HLA.DRB1 |
| HLA.DPB1 | --> | HLA.DRB5 |
| HLA.DPB1 | --> | LAPTM5   |
| HLA.DPB1 | --> | MYC      |
| HLA.DPB1 | --> | RPS4Y1   |
| HLA.DPB1 | --> | SCGB1A1  |
| HLA.DPB1 | --> | SEPP1    |
| HLA.DPB1 | --> | TYROBP   |
| HLA.DQA1 | --- | AIF1     |
| HLA.DQA1 | --> | C15orf48 |
| HLA.DQA1 | --- | C1QA     |
| HLA.DQA1 | --- | C1QB     |
| HLA.DQA1 | --> | CCL18    |
| HLA.DQA1 | --> | CD14     |
| HLA.DQA1 | --> | DCN      |
| HLA.DQA1 | --> | GCHFR    |
| HLA.DQA1 | --> | GGT1     |
| HLA.DQA1 | --> | HLA.DMA  |
| HLA.DQA1 | --> | HLA.DMB  |
| HLA.DQA1 | --> | HLA.DPA1 |
| HLA.DQA1 | --> | HLA.DRB5 |
| HLA.DQA1 | --> | ITGA2    |
| HLA.DQA1 | --> | KRT5     |
| HLA.DQA1 | --> | LILRB4   |
| HLA.DQA1 | --> | MERTK    |
| HLA.DQA1 | --> | MS4A4A   |
| HLA.DQA1 | --> | MS4A6A   |
| HLA.DQA1 | --> | NEBL     |

|          |     |           |
|----------|-----|-----------|
| HLA.DQA1 | --> | PDLIM2    |
| HLA.DQA1 | --> | SGK1      |
| HLA.DRA  | --> | AGR2      |
| HLA.DRA  | --- | AIF1      |
| HLA.DRA  | --> | ASAH1     |
| HLA.DRA  | --> | ASPH      |
| HLA.DRA  | --> | BGN       |
| HLA.DRA  | --> | CALD1     |
| HLA.DRA  | --> | COL6A2    |
| HLA.DRA  | --> | COMP      |
| HLA.DRA  | --> | CTSK      |
| HLA.DRA  | --> | CTSL      |
| HLA.DRA  | --> | CTSS      |
| HLA.DRA  | --> | CYBA      |
| HLA.DRA  | --> | CYP27A1   |
| HLA.DRA  | --> | DCN       |
| HLA.DRA  | --> | FBLN1     |
| HLA.DRA  | --> | FCER1G    |
| HLA.DRA  | --> | FOSB      |
| HLA.DRA  | --> | HLA.DMA   |
| HLA.DRA  | --> | HLA.DPA1  |
| HLA.DRA  | --- | HLA.DPB1  |
| HLA.DRA  | --- | HLA.DQA1  |
| HLA.DRA  | --> | HLA.DRB1  |
| HLA.DRA  | --> | HLA.DRB5  |
| HLA.DRA  | --> | IGF1      |
| HLA.DRA  | --> | LCN2      |
| HLA.DRA  | --> | LGMN      |
| HLA.DRA  | --> | LINC01272 |
| HLA.DRA  | --> | LYZ       |
| HLA.DRA  | --> | MEG3      |
| HLA.DRA  | --> | MFAP4     |
| HLA.DRA  | --> | NBL1      |
| HLA.DRA  | --> | NCKAP5    |
| HLA.DRA  | --> | OLFML3    |
| HLA.DRA  | --> | RARRES2   |
| HLA.DRA  | --> | SCGB3A1   |
| HLA.DRA  | --> | SERPINA1  |
| HLA.DRA  | --> | TGFBI     |
| HLA.DRA  | --> | TNNC1     |
| HLA.DRA  | --> | TYROBP    |
| HLA.DRB1 | --> | AP2S1     |



|          |     |          |
|----------|-----|----------|
| HLA.DRB1 | --> | ASPN     |
| HLA.DRB1 | --> | BGN      |
| HLA.DRB1 | --> | CAPG     |
| HLA.DRB1 | --> | CD63     |
| HLA.DRB1 | --> | COMP     |
| HLA.DRB1 | --> | CTSH     |
| HLA.DRB1 | --> | CYBA     |
| HLA.DRB1 | --> | FBP1     |
| HLA.DRB1 | --> | GRN      |
| HLA.DRB1 | --> | HLA.DMA  |
| HLA.DRB1 | --> | HLA.DMB  |
| HLA.DRB1 | --> | HSPA1A   |
| HLA.DRB1 | --> | LGALS1   |
| HLA.DRB1 | --> | RPS4Y1   |
| HLA.DRB1 | --> | S100A11  |
| HLA.DRB5 | --> | APOC1    |
| HLA.DRB5 | --> | BGN      |
| HLA.DRB5 | --> | CPM      |
| HLA.DRB5 | --> | CTSE     |
| HLA.DRB5 | --> | CTSH     |
| HLA.DRB5 | --> | CYP1B1   |
| HLA.DRB5 | --> | DAPK2    |
| HLA.DRB5 | --> | FOLR2    |
| HLA.DRB5 | --> | GSN      |
| HLA.DRB5 | --> | HLA.DPA1 |
| HLA.DRB5 | --> | HLA.DRB1 |
| HLA.DRB5 | --> | LIMS1    |
| HLA.DRB5 | --> | MGP      |
| HLA.DRB5 | --> | MUC5B    |
| HLA.DRB5 | --> | SCGB3A1  |
| HLA.DRB5 | --> | SERPINA1 |
| HLA.DRB5 | --> | SERPING1 |
| HLA.DRB5 | --> | SPP1     |
| HLA.DRB5 | --> | TIMP1    |
| HLA.DRB5 | --> | WFDC2    |
| HMGB3    | --> | ANOS1    |
| HPCAL1   | --> | ODC1     |
| HSPA1A   | --> | ATF3     |
| HSPA1A   | --> | SERPINH1 |
| HSPA1A   | --> | SFTPC    |
| HTRA3    | --> | FBLN2    |
| HTRA3    | --> | FBN1     |

|        |     |          |
|--------|-----|----------|
| HTRA3  | --> | MXRA8    |
| HTRA3  | --> | OLFML3   |
| HTRA3  | --> | SFRP4    |
| IGF1   | --> | COL14A1  |
| IGF1   | --> | CXCL12   |
| IGF1   | --> | FBN1     |
| IGF1   | --> | GPX1     |
| IGF1   | --> | IGFBP4   |
| IGF1   | --> | MOXD1    |
| IGF1   | --> | OLFML3   |
| IGFBP2 | --> | CAPN2    |
| IGFBP2 | --> | FBXO32   |
| IGFBP2 | --> | SEMA3B   |
| IGFBP4 | --> | FOSB     |
| IGFBP4 | --> | SELM     |
| IGFBP5 | --> | ADH1B    |
| IGFBP5 | --> | ARHGEF26 |
| IGFBP5 | --> | C7       |
| IGFBP5 | --> | CCDC80   |
| IGFBP5 | --> | CTGF     |
| IGFBP5 | --> | CXCL12   |
| IGFBP5 | --> | FBXO32   |
| IGFBP5 | --> | IGFBP2   |
| IGFBP5 | --> | IGFBP4   |
| IGFBP5 | --> | LGALS1   |
| IGFBP5 | --> | PMP22    |
| IGFBP5 | --> | PSAP     |
| IGFBP5 | --> | PTGDS    |
| IGFBP5 | --> | SERPINA1 |
| IGFBP5 | --> | SOX9     |
| IGFBP5 | --> | TIMP1    |
| IGFBP5 | --> | VCAN     |
| INMT   | --> | CDH11    |
| INMT   | --> | CTSK     |
| INMT   | --> | DKK3     |
| INMT   | --> | GPC3     |
| INMT   | --> | LPL      |
| INMT   | --> | LTBP2    |
| INMT   | --> | SFRP2    |
| ISLR   | --> | CCDC80   |
| ISLR   | --> | COL5A1   |
| ISLR   | --> | CTHRC1   |

|          |     |         |
|----------|-----|---------|
| ISLR     | --> | DAPK2   |
| ISLR     | --> | EFEMP1  |
| ISLR     | --> | FBN1    |
| ISLR     | --> | HTRA3   |
| ISLR     | --> | MEG3    |
| ISLR     | --> | NTM     |
| ISLR     | --> | POSTN   |
| ISLR     | --> | RTKN2   |
| ISLR     | --> | TMEM45A |
| ISLR     | --> | TSPAN1  |
| ITGA2    | --> | CD24    |
| ITGA2    | --> | CDH1    |
| ITGA2    | --> | CLDN1   |
| ITGA2    | --> | CXADR   |
| ITGA2    | --> | DUSP6   |
| ITGA2    | --> | EGFR    |
| ITGA2    | --> | EVA1A   |
| ITGA2    | --> | KRT17   |
| ITGA2    | --> | LAMB3   |
| ITGA2    | --> | OCIAD2  |
| ITGA2    | --> | PRSS8   |
| ITGA2    | --> | S100A2  |
| ITGA2    | --> | SOX9    |
| ITGA2    | --> | SYTL1   |
| KIAA1324 | --> | ARFGEF3 |
| KIAA1324 | --> | CRACR2B |
| KIAA1324 | --> | DHRS3   |
| KIAA1324 | --> | EGFR    |
| KIAA1324 | --> | SCNN1B  |
| KIAA1324 | --> | SOX9    |
| KIAA1324 | --> | VSIG2   |
| KRT15    | --> | ALDH3A1 |
| KRT15    | --> | ASAH1   |
| KRT15    | --> | BCAM    |
| KRT15    | --> | CD24    |
| KRT15    | --> | CLDN3   |
| KRT15    | --> | CRNDE   |
| KRT15    | --> | DUSP6   |
| KRT15    | --> | HES1    |
| KRT15    | --> | HOOK2   |
| KRT15    | --> | IGFBP2  |
| KRT15    | --> | KRT17   |

|       |     |         |
|-------|-----|---------|
| KRT15 | --> | LAMB3   |
| KRT15 | --> | MPZL2   |
| KRT15 | --> | S100A2  |
| KRT15 | --> | SOX9    |
| KRT15 | --> | SYT8    |
| KRT15 | --> | SYTL1   |
| KRT17 | --> | CLDN1   |
| KRT17 | --> | CYP4B1  |
| KRT17 | --> | FBXO32  |
| KRT17 | --> | HMGB3   |
| KRT17 | --> | IGFBP2  |
| KRT17 | --> | NCOA7   |
| KRT17 | --> | SOX9    |
| KRT5  | --> | AGER    |
| KRT5  | --> | AGR3    |
| KRT5  | --> | AK1     |
| KRT5  | --> | ALDH3A1 |
| KRT5  | --> | ARL4D   |
| KRT5  | --> | ASPH    |
| KRT5  | --> | BCAM    |
| KRT5  | --> | BGN     |
| KRT5  | --> | C3      |
| KRT5  | --> | CD9     |
| KRT5  | --> | CEBPD   |
| KRT5  | --> | CHI3L2  |
| KRT5  | --> | CKB     |
| KRT5  | --> | CLDN1   |
| KRT5  | --> | CLDN3   |
| KRT5  | --> | CLIC3   |
| KRT5  | --> | CLIC5   |
| KRT5  | --> | COL1A1  |
| KRT5  | --> | COL8A1  |
| KRT5  | --> | CP      |
| KRT5  | --> | DCN     |
| KRT5  | --> | DHRS3   |
| KRT5  | --> | DKK3    |
| KRT5  | --> | DUSP23  |
| KRT5  | --> | EGFR    |
| KRT5  | --> | ETS2    |
| KRT5  | --> | FAM213A |
| KRT5  | --> | FBLN1   |
| KRT5  | --> | FBP1    |

|       |     |               |
|-------|-----|---------------|
| KRT5  | --> | FBXO32        |
| KRT5  | --> | FHL2          |
| KRT5  | --> | GPC3          |
| KRT5  | --> | HSPA1A        |
| KRT5  | --> | IER3          |
| KRT5  | --> | IGFBP2        |
| KRT5  | --> | IGFBP5        |
| KRT5  | --> | ITGA2         |
| KRT5  | --> | KRT15         |
| KRT5  | --> | KRT17         |
| KRT5  | --> | KRT6A         |
| KRT5  | --> | LAMA3         |
| KRT5  | --> | LTBP4         |
| KRT5  | --> | LUM           |
| KRT5  | --> | MEG3          |
| KRT5  | --> | MFAP4         |
| KRT5  | --> | MGP           |
| KRT5  | --> | MPZL2         |
| KRT5  | --> | MYC           |
| KRT5  | --> | POSTN         |
| KRT5  | --> | RAB25         |
| KRT5  | --> | RP11.532F12.5 |
| KRT5  | --> | RPS4Y1        |
| KRT5  | --> | RTKN2         |
| KRT5  | --> | S100A2        |
| KRT5  | --> | SCD           |
| KRT5  | --> | SDR16C5       |
| KRT5  | --> | SERPINB5      |
| KRT5  | --> | SFTPA1        |
| KRT5  | --> | SFTPD         |
| KRT5  | --> | SOX9          |
| KRT5  | --> | SPARCL1       |
| KRT5  | --> | SYT8          |
| KRT5  | --> | SYTL1         |
| KRT5  | --> | TFRC          |
| KRT5  | --> | TSPAN1        |
| KRT6A | --> | ADGRF5        |
| KRT6A | --> | ASPN          |
| KRT6A | --> | BGN           |
| KRT6A | --> | C10orf10      |
| KRT6A | --> | COL4A3        |
| KRT6A | --> | COL5A1        |

|       |     |          |
|-------|-----|----------|
| KRT6A | --> | COL5A2   |
| KRT6A | --> | COL6A3   |
| KRT6A | --> | CXCL14   |
| KRT6A | --> | CYP1B1   |
| KRT6A | --> | DAPK2    |
| KRT6A | --> | DPT      |
| KRT6A | --> | FBLN1    |
| KRT6A | --> | FGFBP1   |
| KRT6A | --> | ISLR     |
| KRT6A | --> | LCN2     |
| KRT6A | --> | LRRK2    |
| KRT6A | --> | MYRF     |
| KRT6A | --> | NBL1     |
| KRT6A | --> | NCKAP5   |
| KRT6A | --> | PCOLCE   |
| KRT6A | --> | PCYOX1   |
| KRT6A | --> | RAB17    |
| KRT6A | --> | RTKN2    |
| KRT6A | --> | SLC6A14  |
| KRT6A | --> | SMIM22   |
| KRT6A | --> | SYT8     |
| KRT6A | --> | TMC5     |
| KRT6A | --> | WIF1     |
| LAMA3 | --> | ALDH3A1  |
| LAMA3 | --> | ANKRD29  |
| LAMA3 | --> | ANOS1    |
| LAMA3 | --> | ARHGEF26 |
| LAMA3 | --> | CXADR    |
| LAMA3 | --> | GCHFR    |
| LAMA3 | --> | LAMB3    |
| LAMA3 | --> | LY96     |
| LAMA3 | --> | PLA2G7   |
| LAMA3 | --> | PRSS8    |
| LAMA3 | --> | SEMA3B   |
| LAMA3 | --> | SOX9     |
| LAMA3 | --> | SYT8     |
| LAMB3 | --> | BCAM     |
| LAMB3 | --> | CKB      |
| LAMB3 | --> | CLDN1    |
| LAMB3 | --> | FAM129B  |
| LAMB3 | --> | KRT17    |
| LAMB3 | --> | MGLL     |

|        |     |          |
|--------|-----|----------|
| LAMB3  | --> | SEMA3B   |
| LAMP3  | --> | ABCA3    |
| LAMP3  | --> | AK1      |
| LAMP3  | --> | ALPL     |
| LAMP3  | --> | ATP11A   |
| LAMP3  | --> | C3       |
| LAMP3  | --> | CACNA2D2 |
| LAMP3  | --> | CXCL2    |
| LAMP3  | --> | DMBT1    |
| LAMP3  | --> | FASN     |
| LAMP3  | --> | GKN2     |
| LAMP3  | --> | LRRK2    |
| LAMP3  | --> | MFSD2A   |
| LAMP3  | --> | MSMO1    |
| LAMP3  | --> | PEBP4    |
| LAMP3  | --> | PGC      |
| LAMP3  | --> | S100A2   |
| LAMP3  | --> | SCD      |
| LAMP3  | --> | SFTPA1   |
| LAMP3  | --> | SFTPC    |
| LAMP3  | --> | SFTPD    |
| LAMP3  | --> | SLC6A14  |
| LAPTM5 | --> | ACTB     |
| LAPTM5 | --> | FBP1     |
| LAPTM5 | --> | HES1     |
| LAPTM5 | --> | HOOK2    |
| LAPTM5 | --> | LILRB4   |
| LAPTM5 | --> | LPL      |
| LAPTM5 | --> | LYZ      |
| LAPTM5 | --> | NEAT1    |
| LAPTM5 | --> | SELM     |
| LAPTM5 | --> | SERPINH1 |
| LAPTM5 | --> | SGK1     |
| LAPTM5 | --> | TGFBI    |
| LAPTM5 | --> | TREM2    |
| LAPTM5 | --> | VIM      |
| LCN2   | --> | AGR2     |
| LCN2   | --> | BPIFB1   |
| LCN2   | --> | C15orf48 |
| LCN2   | --> | C3       |
| LCN2   | --> | CDH1     |
| LCN2   | --> | CP       |

|        |     |               |
|--------|-----|---------------|
| LCN2   | --> | CTSD          |
| LCN2   | --> | CTSL          |
| LCN2   | --> | CXCL1         |
| LCN2   | --> | CYBA          |
| LCN2   | --> | GKN2          |
| LCN2   | --> | LGALS1        |
| LCN2   | --> | MDK           |
| LCN2   | --> | MEG3          |
| LCN2   | --> | RAB25         |
| LCN2   | --> | RP11.532F12.5 |
| LCN2   | --> | SLC6A14       |
| LCN2   | --> | SPINT1        |
| LCN2   | --> | TMC5          |
| LCN2   | --> | TMEM45A       |
| LCN2   | --> | TSPAN1        |
| LCN2   | --> | TSPAN8        |
| LCN2   | --> | WFDC2         |
| LDLR   | --> | CXADR         |
| LDLR   | --> | CYR61         |
| LDLR   | --> | DUSP6         |
| LDLR   | --> | FAM129B       |
| LDLR   | --> | FASN          |
| LDLR   | --> | FOSB          |
| LDLR   | --> | NCOA7         |
| LDLR   | --> | RAB11FIP1     |
| LDLR   | --> | SGMS2         |
| LDLR   | --> | TRIB1         |
| LGALS1 | --> | ACTB          |
| LGALS1 | --> | ADGRF5        |
| LGALS1 | --> | AGR3          |
| LGALS1 | --> | ATOX1         |
| LGALS1 | --> | ATP1A1        |
| LGALS1 | --> | CD55          |
| LGALS1 | --> | CD9           |
| LGALS1 | --> | COX6C         |
| LGALS1 | --> | CRNDE         |
| LGALS1 | --> | CTSZ          |
| LGALS1 | --> | CYBA          |
| LGALS1 | --> | HLA.DMA       |
| LGALS1 | --> | LIMS1         |
| LGALS1 | --> | LY96          |
| LGALS1 | --> | SCGB3A1       |



|         |     |          |
|---------|-----|----------|
| LGALS1  | --> | SFTPA1   |
| LGALS1  | --> | SFTPC    |
| LGALS1  | --> | TGFBI    |
| LGALS1  | --> | TIMP3    |
| LGALS1  | --> | TYMP     |
| LGALS1  | --> | VIM      |
| LGALS1  | --> | WFDC2    |
| LGALS3  | --> | BLVRB    |
| LGALS3  | --> | CAPG     |
| LGALS3  | --> | CD63     |
| LGALS3  | --> | CD9      |
| LGALS3  | --> | CES1     |
| LGALS3  | --> | GLUL     |
| LGALS3  | --> | H2AFY    |
| LGALS3  | --> | PLA2G7   |
| LGALS3  | --> | TGFBI    |
| LGALS7B | --> | ABCA3    |
| LGALS7B | --> | AGR2     |
| LGALS7B | --> | ALDH3A1  |
| LGALS7B | --> | ANOS1    |
| LGALS7B | --> | C1S      |
| LGALS7B | --> | CAV2     |
| LGALS7B | --> | CCDC80   |
| LGALS7B | --> | CTSD     |
| LGALS7B | --> | CTSK     |
| LGALS7B | --> | CYP1B1   |
| LGALS7B | --> | DAPK2    |
| LGALS7B | --> | DCN      |
| LGALS7B | --> | FGFBP1   |
| LGALS7B | --> | GPC3     |
| LGALS7B | --> | HMGB3    |
| LGALS7B | --> | IGF1     |
| LGALS7B | --> | ITGA2    |
| LGALS7B | --> | KIAA1324 |
| LGALS7B | --> | KRT5     |
| LGALS7B | --> | KRT6A    |
| LGALS7B | --> | LTBP2    |
| LGALS7B | --> | MBIP     |
| LGALS7B | --> | MYRF     |
| LGALS7B | --> | PLL      |
| LGALS7B | --> | PTGDS    |
| LGALS7B | --> | RPS4Y1   |

|           |     |          |
|-----------|-----|----------|
| LGALS7B   | --> | RTKN2    |
| LGALS7B   | --> | S100A2   |
| LGALS7B   | --> | SCNN1B   |
| LGALS7B   | --> | SERPINB5 |
| LGMN      | --> | CREG1    |
| LGMN      | --> | MFSD1    |
| LILRB4    | --> | C15orf48 |
| LILRB4    | --> | CA2      |
| LILRB4    | --> | CTSH     |
| LILRB4    | --> | FAM105A  |
| LILRB4    | --> | MYO1B    |
| LILRB4    | --> | NNMT     |
| LIMS1     | --> | A2M      |
| LINC01272 | --> | C15orf48 |
| LINC01272 | --> | PLA2G7   |
| LINC01272 | --> | SEPP1    |
| LINC01272 | --> | SLC16A10 |
| LIPA      | --> | BLVRB    |
| LIPA      | --> | LGMN     |
| LIPA      | --> | PLA2G7   |
| LIPA      | --> | PLD3     |
| LIPA      | --> | TFRC     |
| LMO3      | --> | CADM1    |
| LMO3      | --> | CYP4B1   |
| LMO3      | --> | FLRT3    |
| LMO3      | --> | RNF145   |
| LPCAT1    | --> | ALPL     |
| LPCAT1    | --> | ATP11A   |
| LPCAT1    | --> | FASN     |
| LPCAT1    | --> | NEAT1    |
| LPCAT1    | --> | RNF145   |
| LPCAT1    | --> | TMC5     |
| LPL       | --> | ALCAM    |
| LPL       | --> | CA2      |
| LPL       | --> | CD9      |
| LPL       | --> | CYP27A1  |
| LPL       | --> | DAB2     |
| LPL       | --> | FABP5    |
| LPL       | --> | FHL1     |
| LPL       | --> | GPC3     |
| LPL       | --> | IGSF6    |
| LPL       | --> | LIMS1    |

|       |     |           |
|-------|-----|-----------|
| LPL   | --> | LINC01272 |
| LPL   | --> | LIPA      |
| LPL   | --> | SPP1      |
| LPL   | --> | TREM2     |
| LRRK2 | --> | C15orf48  |
| LRRK2 | --> | CRNDE     |
| LRRK2 | --> | LPCAT1    |
| LRRK2 | --> | MDK       |
| LRRK2 | --> | SFTPA1    |
| LRRK2 | --> | SFTPC     |
| LRRK2 | --> | TACC2     |
| LST1  | --> | AP2S1     |
| LST1  | --> | CD63      |
| LST1  | --> | COL8A1    |
| LST1  | --> | CYBB      |
| LST1  | --> | FBP1      |
| LST1  | --> | GGT1      |
| LST1  | --> | HLA.DRB1  |
| LST1  | --> | KRT6A     |
| LST1  | --> | LAPTM5    |
| LST1  | --> | MARCO     |
| LST1  | --> | MMP1      |
| LST1  | --> | MRC1      |
| LST1  | --> | PLD3      |
| LST1  | --> | SH3BGRL3  |
| LTBP1 | --> | BRI3      |
| LTBP1 | --> | COL8A1    |
| LTBP1 | --> | LTBP2     |
| LTBP1 | --> | VCAN      |
| LTBP2 | --> | CAV2      |
| LTBP2 | --> | CDH11     |
| LTBP2 | --> | COL8A1    |
| LTBP2 | --> | DKK3      |
| LTBP2 | --> | LTBP4     |
| LTBP2 | --> | MOXD1     |
| LTBP4 | --> | GPC3      |
| LTBP4 | --> | RARRES1   |
| LUM   | --> | A2M       |
| LUM   | --> | AEBP1     |
| LUM   | --> | C7        |
| LUM   | --> | COL5A2    |
| LUM   | --> | CTSL      |

|       |     |          |
|-------|-----|----------|
| LUM   | --> | CYP1B1   |
| LUM   | --> | MFAP4    |
| LUM   | --> | MMP2     |
| LUM   | --> | PTGDS    |
| LUM   | --> | SPARC    |
| LUM   | --> | SPARCL1  |
| LUM   | --> | TCF21    |
| LUM   | --> | TIMP1    |
| LYZ   | --> | CKB      |
| LYZ   | --> | CTSS     |
| LYZ   | --> | IGFBP4   |
| LYZ   | --> | LGMN     |
| LYZ   | --> | MYL9     |
| LYZ   | --> | NGFRAP1  |
| LYZ   | --> | RPS4Y1   |
| LYZ   | --> | SLC16A10 |
| LYZ   | --> | VIM      |
| MAGI3 | --> | FMO2     |
| MAGI3 | --> | LMO3     |
| MAGI3 | --> | PEG10    |
| MAP2  | --> | A2M      |
| MAP2  | --> | ABCA7    |
| MAP2  | --> | CLIC5    |
| MAP2  | --> | COL4A3   |
| MAP2  | --> | COL4A4   |
| MAP2  | --> | COL5A1   |
| MAP2  | --> | COL6A1   |
| MAP2  | --> | CST6     |
| MAP2  | --> | ERBB3    |
| MAP2  | --> | FGG      |
| MAP2  | --> | FHL1     |
| MAP2  | --> | IGFBP5   |
| MAP2  | --> | ITGA2    |
| MAP2  | --> | KRT5     |
| MAP2  | --> | LAMA3    |
| MAP2  | --> | MMP1     |
| MAP2  | --> | MYRF     |
| MAP2  | --> | NEBL     |
| MAP2  | --> | NTM      |
| MAP2  | --> | RAB17    |
| MAP2  | --> | SCEL     |
| MAP2  | --> | TFF3     |

|       |     |           |
|-------|-----|-----------|
| MAP2  | --> | TNNC1     |
| MARCO | --> | A2M       |
| MARCO | --> | APOC1     |
| MARCO | --> | CCL18     |
| MARCO | --> | CCL20     |
| MARCO | --> | CES1      |
| MARCO | --> | CYBB      |
| MARCO | --> | CYP27A1   |
| MARCO | --> | EMP3      |
| MARCO | --> | FBP1      |
| MARCO | --> | GCHFR     |
| MARCO | --> | GSTO1     |
| MARCO | --> | H2AFY     |
| MARCO | --> | IGFBP4    |
| MARCO | --> | LGMN      |
| MARCO | --> | LINC01272 |
| MARCO | --> | LYZ       |
| MARCO | --> | OCIAD2    |
| MARCO | --> | PLA2G7    |
| MARCO | --> | S100A11   |
| MARCO | --> | SEPP1     |
| MARCO | --> | SERPINA1  |
| MARCO | --> | TIMP3     |
| MARCO | --> | TMEM45A   |
| MARCO | --> | VCAN      |
| MBIP  | --> | ASPH      |
| MBIP  | --> | EVA1A     |
| MBIP  | --> | FAM105A   |
| MBIP  | --> | PARM1     |
| MBIP  | --> | SNHG8     |
| MDK   | --> | CEBPD     |
| MDK   | --> | MFSD2A    |
| MDK   | --> | RARRES3   |
| MEG3  | --> | ARL4D     |
| MEG3  | --> | C4BPA     |
| MEG3  | --> | CTSZ      |
| MEG3  | --> | CXCL14    |
| MEG3  | --> | FHL1      |
| MEG3  | --> | LGMN      |
| MEG3  | --> | LTBP4     |
| MEG3  | --> | MYC       |
| MEG3  | --> | NGFRAP1   |

|       |     |          |
|-------|-----|----------|
| MEG3  | --> | SERPINH1 |
| MEG3  | --> | VCAN     |
| MERTK | --> | CPM      |
| MERTK | --> | CTSB     |
| MERTK | --> | FGG      |
| MERTK | --> | GGT1     |
| MERTK | --> | GPNMB    |
| MERTK | --> | HLA.DRB1 |
| MERTK | --> | MAP2     |
| MERTK | --> | SEPP1    |
| MERTK | --> | SERPINA1 |
| MERTK | --> | SLC16A10 |
| MERTK | --> | SPP1     |
| MFAP4 | --> | A2M      |
| MFAP4 | --> | ADH1B    |
| MFAP4 | --> | AEBP1    |
| MFAP4 | --> | C7       |
| MFAP4 | --> | CALD1    |
| MFAP4 | --> | CES1     |
| MFAP4 | --> | CTHRC1   |
| MFAP4 | --> | CXCL12   |
| MFAP4 | --> | EFEMP1   |
| MFAP4 | --> | FHL1     |
| MFAP4 | --> | ISLR     |
| MFAP4 | --> | MGP      |
| MFAP4 | --> | MMP2     |
| MFAP4 | --> | OLFML3   |
| MFAP4 | --> | PLAC9    |
| MFAP4 | --> | PRELP    |
| MFAP4 | --> | PTGDS    |
| MFAP4 | --> | SPARCL1  |
| MFAP4 | --> | TCF21    |
| MFAP4 | --> | TIMP3    |
| MGLL  | --> | ANKRD29  |
| MGLL  | --> | CXCL14   |
| MGLL  | --> | CYBA     |
| MGLL  | --> | HPCAL1   |
| MGLL  | --> | SCD      |
| MGP   | --> | CALD1    |
| MGP   | --> | CTGF     |
| MGP   | --> | GPX1     |
| MGP   | --> | GSN      |

|       |     |          |
|-------|-----|----------|
| MGP   | --> | OCIAD2   |
| MGP   | --> | PLA2G1B  |
| MGP   | --> | PLS3     |
| MGP   | --> | SCGB3A1  |
| MGP   | --> | SERPING1 |
| MGP   | --> | SGK1     |
| MGP   | --> | SH3BGRL3 |
| MGP   | --> | TIMP1    |
| MGP   | --> | TSC22D1  |
| MGP   | --> | TSPAN8   |
| MGP   | --> | VIM      |
| MLPH  | --> | SELM     |
| MMP1  | --> | ALDH3A1  |
| MMP1  | --> | KRT15    |
| MMP1  | --> | KRT5     |
| MMP1  | --> | LGALS7B  |
| MMP1  | --> | SERPINB5 |
| MMP1  | --> | SFTPC    |
| MMP2  | --> | ANXA3    |
| MMP2  | --> | CTSK     |
| MMP2  | --> | LTBP1    |
| MMP2  | --> | PMP22    |
| MMP2  | --> | SPARC    |
| MOXD1 | --> | ELN      |
| MOXD1 | --> | FGF7     |
| MPZL2 | --> | ASPH     |
| MPZL2 | --> | BCAM     |
| MPZL2 | --> | CALM3    |
| MPZL2 | --> | CD9      |
| MPZL2 | --> | CRNDE    |
| MPZL2 | --> | CTSH     |
| MPZL2 | --> | CXADR    |
| MPZL2 | --> | DUSP6    |
| MPZL2 | --> | EGFR     |
| MPZL2 | --> | FLRT3    |
| MPZL2 | --> | ITGA2    |
| MPZL2 | --> | LAMB3    |
| MPZL2 | --> | MBIP     |
| MPZL2 | --> | MFSD1    |
| MPZL2 | --> | MFSD2A   |
| MPZL2 | --> | OCIAD2   |
| MPZL2 | --> | PPA1     |

|        |     |          |
|--------|-----|----------|
| MPZL2  | --> | PRSS8    |
| MPZL2  | --> | RNF145   |
| MPZL2  | --> | S100A2   |
| MPZL2  | --> | SDR16C5  |
| MPZL2  | --> | VSIG2    |
| MRC1   | --> | ALCAM    |
| MRC1   | --> | GLUL     |
| MRC1   | --> | IGSF6    |
| MRC1   | --> | LPL      |
| MRC1   | --> | MGLL     |
| MRC1   | --> | MYL9     |
| MRC1   | --> | PPT1     |
| MRC1   | --> | TFRC     |
| MRC1   | --> | TGFBI    |
| MRC1   | --> | TSC22D1  |
| MRC1   | --> | VCAN     |
| MS4A4A | --> | ACP5     |
| MS4A4A | --> | BLVRB    |
| MS4A4A | --> | C4BPA    |
| MS4A4A | --> | CD14     |
| MS4A4A | --> | CD163    |
| MS4A4A | --> | CD63     |
| MS4A4A | --> | CD68     |
| MS4A4A | --> | CFD      |
| MS4A4A | --> | CTSL     |
| MS4A4A | --> | CTSS     |
| MS4A4A | --> | CYP27A1  |
| MS4A4A | --> | EFEMP1   |
| MS4A4A | --> | FHL2     |
| MS4A4A | --> | FOLR2    |
| MS4A4A | --> | GGT1     |
| MS4A4A | --> | GPNMB    |
| MS4A4A | --> | HLA.DRB1 |
| MS4A4A | --> | LAMP3    |
| MS4A4A | --> | LST1     |
| MS4A4A | --> | LY96     |
| MS4A4A | --> | MARCO    |
| MS4A4A | --> | MS4A7    |
| MS4A4A | --> | MYC      |
| MS4A4A | --> | NCOA7    |
| MS4A4A | --> | NEBL     |
| MS4A4A | --> | PDLIM3   |



|        |     |          |
|--------|-----|----------|
| MS4A4A | --> | PGC      |
| MS4A4A | --> | PLA2G7   |
| MS4A4A | --> | PLS3     |
| MS4A4A | --> | RAB25    |
| MS4A4A | --> | SEPP1    |
| MS4A4A | --> | SPP1     |
| MS4A4A | --> | TREM2    |
| MS4A4A | --> | VIM      |
| MS4A4A | --> | VSIG4    |
| MS4A6A | --> | CD14     |
| MS4A6A | --> | CD163    |
| MS4A6A | --> | CSTB     |
| MS4A6A | --> | CTSL     |
| MS4A6A | --> | CYP27A1  |
| MS4A6A | --> | FBP1     |
| MS4A6A | --> | FOLR2    |
| MS4A6A | --> | FPR3     |
| MS4A6A | --> | GGT1     |
| MS4A6A | --> | GPX1     |
| MS4A6A | --> | HLA.DMB  |
| MS4A6A | --> | IGSF6    |
| MS4A6A | --> | LGALS1   |
| MS4A6A | --> | LGALS7B  |
| MS4A6A | --> | LGMN     |
| MS4A6A | --> | LIPA     |
| MS4A6A | --> | LPL      |
| MS4A6A | --> | LY96     |
| MS4A6A | --> | MAP2     |
| MS4A6A | --> | MARCO    |
| MS4A6A | --> | MFSD1    |
| MS4A6A | --> | MS4A4A   |
| MS4A6A | --> | MS4A7    |
| MS4A6A | --> | MYRF     |
| MS4A6A | --> | PMP22    |
| MS4A6A | --> | S100A11  |
| MS4A6A | --> | SDC2     |
| MS4A6A | --> | SDC4     |
| MS4A6A | --> | SH3BGRL3 |
| MS4A6A | --> | SPP1     |
| MS4A6A | --> | TGFBI    |
| MS4A7  | --> | ACP5     |
| MS4A7  | --> | AGR2     |

|       |     |           |
|-------|-----|-----------|
| MS4A7 | --> | C1R       |
| MS4A7 | --> | C1S       |
| MS4A7 | --> | CAV2      |
| MS4A7 | --> | CCL20     |
| MS4A7 | --> | CD163     |
| MS4A7 | --> | CD68      |
| MS4A7 | --> | CPM       |
| MS4A7 | --> | CTSS      |
| MS4A7 | --> | DAB2      |
| MS4A7 | --> | FAM105A   |
| MS4A7 | --> | FGFBP1    |
| MS4A7 | --> | FPR3      |
| MS4A7 | --> | GLUL      |
| MS4A7 | --> | LCN2      |
| MS4A7 | --> | LIMS1     |
| MS4A7 | --> | LINC01272 |
| MS4A7 | --> | LST1      |
| MS4A7 | --> | LYZ       |
| MS4A7 | --> | MFSD1     |
| MS4A7 | --> | MRC1      |
| MS4A7 | --> | MSR1      |
| MS4A7 | --> | PPA1      |
| MS4A7 | --> | RNF130    |
| MS4A7 | --> | SGK1      |
| MS4A7 | --> | SLC16A10  |
| MS4A7 | --> | TFRC      |
| MS4A7 | --> | VSIG4     |
| MS4A7 | --> | WFDC2     |
| MSMO1 | --> | LDLR      |
| MSMO1 | --> | SCD       |
| MSMO1 | --> | TRAM1     |
| MSMO1 | --> | ZDHHC3    |
| MSR1  | --> | ACP5      |
| MSR1  | --> | APOC1     |
| MSR1  | --> | CD68      |
| MSR1  | --> | CTGF      |
| MSR1  | --> | CTSD      |
| MSR1  | --> | CYBB      |
| MSR1  | --> | FPR3      |
| MSR1  | --> | GCHFR     |
| MSR1  | --> | LAPTM5    |
| MSR1  | --> | LYZ       |

|        |     |          |
|--------|-----|----------|
| MSR1   | --> | PLA2G7   |
| MSR1   | --> | RTKN2    |
| MSR1   | --> | SDC2     |
| MSR1   | --> | SH3BGRL3 |
| MT.ND1 | --> | ALCAM    |
| MUC5B  | --> | AGR2     |
| MUC5B  | --> | BCAM     |
| MUC5B  | --> | BPIFB1   |
| MUC5B  | --> | C3       |
| MUC5B  | --> | CCDC80   |
| MUC5B  | --> | CLIC3    |
| MUC5B  | --> | CP       |
| MUC5B  | --> | CPM      |
| MUC5B  | --> | CRACR2B  |
| MUC5B  | --> | CTSE     |
| MUC5B  | --> | CTSH     |
| MUC5B  | --> | DMBT1    |
| MUC5B  | --> | FABP5    |
| MUC5B  | --> | GCHFR    |
| MUC5B  | --> | LCN2     |
| MUC5B  | --> | LGALS3   |
| MUC5B  | --> | MBIP     |
| MUC5B  | --> | RARRES1  |
| MUC5B  | --> | SCGB3A1  |
| MUC5B  | --> | SCNN1B   |
| MUC5B  | --> | SFTPD    |
| MUC5B  | --> | SLC6A14  |
| MUC5B  | --> | SMIM22   |
| MUC5B  | --> | SPARC    |
| MUC5B  | --> | STARD10  |
| MUC5B  | --> | TFF3     |
| MUC5B  | --> | TMEM45A  |
| MUC5B  | --> | TSPAN1   |
| MUC5B  | --> | TSPAN8   |
| MUC5B  | --> | VSIG2    |
| MUC5B  | --> | WFDC2    |
| MXRA8  | --> | CDH11    |
| MXRA8  | --> | LTBP1    |
| MXRA8  | --> | MMP2     |
| MYC    | --> | ATF3     |
| MYC    | --> | CYR61    |
| MYC    | --> | FOSB     |

|        |     |          |
|--------|-----|----------|
| MYC    | --> | GEM      |
| MYC    | --> | IER3     |
| MYC    | --> | LDLR     |
| MYC    | --> | SNHG8    |
| MYC    | --> | TRIB1    |
| MYL12B | --> | ACTB     |
| MYL12B | --> | CALM2    |
| MYL12B | --> | CD47     |
| MYL12B | --> | CD9      |
| MYL12B | --> | COX6C    |
| MYL12B | --> | RARRES3  |
| MYL9   | --> | CD151    |
| MYL9   | --> | NGFRAP1  |
| MYL9   | --> | SELM     |
| MYL9   | --> | SERPINH1 |
| MYO1B  | --> | FAM129B  |
| MYO1B  | --> | MLLT4    |
| MYRF   | --> | ADH1B    |
| MYRF   | --> | AGER     |
| MYRF   | --> | ARHGEF26 |
| MYRF   | --> | ARL4D    |
| MYRF   | --> | ASPN     |
| MYRF   | --> | C7       |
| MYRF   | --> | CACNA2D2 |
| MYRF   | --> | CAV2     |
| MYRF   | --> | CCDC80   |
| MYRF   | --> | CCL20    |
| MYRF   | --> | CDH11    |
| MYRF   | --> | CES1     |
| MYRF   | --> | CFD      |
| MYRF   | --> | CHI3L2   |
| MYRF   | --> | CLIC5    |
| MYRF   | --> | COL1A2   |
| MYRF   | --> | COL4A3   |
| MYRF   | --> | COL6A3   |
| MYRF   | --> | COMP     |
| MYRF   | --> | CST6     |
| MYRF   | --> | CTGF     |
| MYRF   | --> | CXCL12   |
| MYRF   | --> | CYP1B1   |
| MYRF   | --> | DAPK2    |
| MYRF   | --> | EMP3     |

|      |     |         |
|------|-----|---------|
| MYRF | --> | FAM213A |
| MYRF | --> | GGTLC1  |
| MYRF | --> | GSN     |
| MYRF | --> | GSTA1   |
| MYRF | --> | IGFBP5  |
| MYRF | --> | ISLR    |
| MYRF | --> | LAPTM5  |
| MYRF | --> | MLPH    |
| MYRF | --> | MMP2    |
| MYRF | --> | MT.ND1  |
| MYRF | --> | MYC     |
| MYRF | --> | NCKAP5  |
| MYRF | --> | NTM     |
| MYRF | --> | PDLIM3  |
| MYRF | --> | PLLP    |
| MYRF | --> | POSTN   |
| MYRF | --> | PRELP   |
| MYRF | --> | RARRES2 |
| MYRF | --> | RPS4Y1  |
| MYRF | --> | SCEL    |
| MYRF | --> | SFRP2   |
| MYRF | --> | SOX9    |
| MYRF | --> | SPARCL1 |
| MYRF | --> | SYT8    |
| MYRF | --> | SYTL1   |
| MYRF | --> | TCF21   |
| MYRF | --> | THY1    |
| NBL1 | --> | C1R     |
| NBL1 | --> | C1S     |
| NBL1 | --> | CDH11   |
| NBL1 | --> | CHI3L2  |
| NBL1 | --> | CTSH    |
| NBL1 | --> | DKK3    |
| NBL1 | --> | ELN     |
| NBL1 | --> | FBLN1   |
| NBL1 | --> | HTRA3   |
| NBL1 | --> | LUM     |
| NBL1 | --> | MFAP4   |
| NBL1 | --> | MMP2    |
| NBL1 | --> | MXRA8   |
| NBL1 | --> | RARRES2 |
| NBL1 | --> | TPM2    |

|        |     |          |
|--------|-----|----------|
| NCKAP5 | --> | CACNA2D2 |
| NCKAP5 | --> | CSTB     |
| NCKAP5 | --> | CTHRC1   |
| NCKAP5 | --> | CTSL     |
| NCKAP5 | --> | DAPK2    |
| NCKAP5 | --> | FBLN2    |
| NCKAP5 | --> | FMO2     |
| NCKAP5 | --> | GGTLC1   |
| NCKAP5 | --> | HTRA3    |
| NCKAP5 | --> | IGFBP5   |
| NCKAP5 | --> | OCIAD2   |
| NCKAP5 | --> | PEG10    |
| NCKAP5 | --> | PLLP     |
| NCKAP5 | --> | PMP22    |
| NCKAP5 | --> | RTKN2    |
| NCKAP5 | --> | SERPINA1 |
| NCKAP5 | --> | SFRP4    |
| NCKAP5 | --> | SPARCL1  |
| NEAT1  | --> | ACTB     |
| NEAT1  | --> | ATP1A1   |
| NEAT1  | --> | CEBPD    |
| NEAT1  | --> | HOOK2    |
| NEAT1  | --> | RNF145   |
| NEBL   | --> | ABCA7    |
| NEBL   | --> | BGN      |
| NEBL   | --> | CALD1    |
| NEBL   | --> | COL4A4   |
| NEBL   | --> | COL6A3   |
| NEBL   | --> | CXCL14   |
| NEBL   | --> | GSTA1    |
| NEBL   | --> | HHIP     |
| NEBL   | --> | MLLT4    |
| NEBL   | --> | MUC5B    |
| NEBL   | --> | PDLIM3   |
| NEBL   | --> | SCEL     |
| NEBL   | --> | SPARCL1  |
| NNMT   | --> | C10orf10 |
| NNMT   | --> | CEBPD    |
| NNMT   | --> | FGF7     |
| NNMT   | --> | IGFBP4   |
| NNMT   | --> | SELM     |
| NTM    | --> | AP2S1    |

|        |     |         |
|--------|-----|---------|
| NTM    | --> | COL5A1  |
| NTM    | --> | COL8A1  |
| NTM    | --> | CTGF    |
| NTM    | --> | CTSE    |
| NTM    | --> | EVA1A   |
| NTM    | --> | IGFBP5  |
| NTM    | --> | INMT    |
| NTM    | --> | MYO1B   |
| NTM    | --> | RTKN2   |
| NTM    | --> | SCEL    |
| NTM    | --> | SEMA3B  |
| NTM    | --> | TNNC1   |
| OCIAD2 | --> | CD9     |
| OCIAD2 | --> | CRNDE   |
| OCIAD2 | --> | CTNNA1  |
| OCIAD2 | --> | CXADR   |
| OCIAD2 | --> | EVA1A   |
| OCIAD2 | --> | HMGB3   |
| OCIAD2 | --> | LMO3    |
| OCIAD2 | --> | MDK     |
| OCIAD2 | --> | RARRES3 |
| OCIAD2 | --> | S100A2  |
| OLFML3 | --> | APOD    |
| OLFML3 | --> | COL14A1 |
| OLFML3 | --> | DKK3    |
| OLFML3 | --> | FGF7    |
| OLFML3 | --> | LTBP1   |
| OLFML3 | --> | MXRA8   |
| PARM1  | --> | MLPH    |
| PARM1  | --> | MYO1B   |
| PARM1  | --> | PRKCZ   |
| PCOLCE | --> | C1R     |
| PCOLCE | --> | C1S     |
| PCOLCE | --> | CCDC80  |
| PCOLCE | --> | COL1A2  |
| PCOLCE | --> | COL3A1  |
| PCOLCE | --> | COL5A2  |
| PCOLCE | --> | COL6A1  |
| PCOLCE | --> | COL6A2  |
| PCOLCE | --> | COL6A3  |
| PCOLCE | --> | CTHRC1  |
| PCOLCE | --> | DPT     |

|        |     |          |
|--------|-----|----------|
| PCOLCE | --> | FSTL1    |
| PCOLCE | --> | ISLR     |
| PCOLCE | --> | MOXD1    |
| PCOLCE | --> | OLFML3   |
| PCOLCE | --> | RARRES2  |
| PCOLCE | --> | THY1     |
| PCOLCE | --> | TIMP1    |
| PCOLCE | --> | TPM2     |
| PDLIM2 | --> | CD151    |
| PDLIM3 | --> | C1S      |
| PDLIM3 | --> | CDH11    |
| PDLIM3 | --> | CFD      |
| PDLIM3 | --> | FHL1     |
| PDLIM3 | --> | GEM      |
| PDLIM3 | --> | IGF1     |
| PDLIM3 | --> | IGFBP5   |
| PDLIM3 | --> | MYC      |
| PDLIM3 | --> | NBL1     |
| PDLIM3 | --> | NEAT1    |
| PDLIM3 | --> | NNMT     |
| PDLIM3 | --> | PTGDS    |
| PDLIM3 | --> | RARRES2  |
| PDLIM3 | --> | TPM2     |
| PEBP4  | --> | AK1      |
| PEBP4  | --> | C12orf49 |
| PEBP4  | --> | CACNA2D2 |
| PEBP4  | --> | CPM      |
| PEBP4  | --> | CSTB     |
| PEBP4  | --> | FABP5    |
| PEBP4  | --> | FBP1     |
| PEBP4  | --> | FGGY     |
| PEBP4  | --> | LGMN     |
| PEBP4  | --> | MBIP     |
| PEBP4  | --> | MGLL     |
| PEBP4  | --> | MID1IP1  |
| PEBP4  | --> | MLPH     |
| PEBP4  | --> | NGFRAP1  |
| PEBP4  | --> | SDR16C5  |
| PEBP4  | --> | SERPINA1 |
| PEBP4  | --> | SUSD2    |
| PEBP4  | --> | TMEM45A  |
| PEBP4  | --> | VSIG2    |



|         |     |          |
|---------|-----|----------|
| PEG10   | --> | CTGF     |
| PEG10   | --> | FAM129B  |
| PEG10   | --> | RAB17    |
| PGC     | --> | ABCA3    |
| PGC     | --> | ALPL     |
| PGC     | --> | BPIFB1   |
| PGC     | --> | CACNA2D2 |
| PGC     | --> | CEBPD    |
| PGC     | --> | CTSB     |
| PGC     | --> | CTSH     |
| PGC     | --> | DMBT1    |
| PGC     | --> | FGGY     |
| PGC     | --> | FLRT3    |
| PGC     | --> | GKN2     |
| PGC     | --> | LRRK2    |
| PGC     | --> | MFSD2A   |
| PGC     | --> | MGLL     |
| PGC     | --> | MID1IP1  |
| PGC     | --> | MLPH     |
| PGC     | --> | MPZL2    |
| PGC     | --> | PARM1    |
| PGC     | --> | PEBP4    |
| PGC     | --> | PRSS8    |
| PGC     | --> | SDR16C5  |
| PGC     | --> | SFTPA1   |
| PGC     | --> | SFTPC    |
| PGC     | --> | SFTPD    |
| PGC     | --> | SLC22A31 |
| PGC     | --> | SLC6A14  |
| PGC     | --> | SUSD2    |
| PGC     | --> | TACC2    |
| PGC     | --> | TSPAN8   |
| PGC     | --> | WIF1     |
| PLA2G1B | --> | ABCA3    |
| PLA2G1B | --> | ANKRD29  |
| PLA2G1B | --> | C4BPA    |
| PLA2G1B | --> | CA2      |
| PLA2G1B | --> | CP       |
| PLA2G1B | --> | CTSE     |
| PLA2G1B | --> | CYBA     |
| PLA2G1B | --> | DAB2     |
| PLA2G1B | --> | DSTN     |

|         |     |          |
|---------|-----|----------|
| PLA2G1B | --> | EVA1A    |
| PLA2G1B | --> | GGTLC1   |
| PLA2G1B | --> | GKN2     |
| PLA2G1B | --> | GSN      |
| PLA2G1B | --> | LAMP3    |
| PLA2G1B | --> | MDK      |
| PLA2G1B | --> | MID1IP1  |
| PLA2G1B | --> | MSMO1    |
| PLA2G1B | --> | NNMT     |
| PLA2G1B | --> | PEBP4    |
| PLA2G1B | --> | PGC      |
| PLA2G1B | --> | SDR16C5  |
| PLA2G1B | --> | SERPINA1 |
| PLA2G1B | --> | SGMS2    |
| PLA2G1B | --> | SLC6A14  |
| PLA2G7  | --> | CYP27A1  |
| PLA2G7  | --> | IGFBP4   |
| PLA2G7  | --> | IGSF6    |
| PLA2G7  | --> | LG MN    |
| PLA2G7  | --> | LILRB4   |
| PLA2G7  | --> | MFSD1    |
| PLA2G7  | --> | MGLL     |
| PLA2G7  | --> | SDR16C5  |
| PLA2G7  | --> | SEPP1    |
| PLA2G7  | --> | TFRC     |
| PLA2G7  | --> | VCAN     |
| PLAC9   | --> | EMP3     |
| PLAC9   | --> | FSTL1    |
| PLAC9   | --> | GSN      |
| PLAC9   | --> | IGFBP4   |
| PLAC9   | --> | NNMT     |
| PLAC9   | --> | PMP22    |
| PLAC9   | --> | TIMP3    |
| PLD3    | --> | LG MN    |
| PLLP    | --> | ANKRD29  |
| PLLP    | --> | ARL4D    |
| PLLP    | --> | ASAH1    |
| PLLP    | --> | CHI3L2   |
| PLLP    | --> | CLIC3    |
| PLLP    | --> | CTSH     |
| PLLP    | --> | FAM105A  |
| PLLP    | --> | GKN2     |

|       |     |          |
|-------|-----|----------|
| PLL   | --> | GPC3     |
| PLL   | --> | GPNMB    |
| PLL   | --> | LCN2     |
| PLL   | --> | MGLL     |
| PLL   | --> | MPZL2    |
| PLL   | --> | MSMO1    |
| PLL   | --> | PEBP4    |
| PLL   | --> | PLA2G1B  |
| PLL   | --> | PMP22    |
| PLL   | --> | PPA1     |
| PLL   | --> | RAB25    |
| PLL   | --> | RPS4Y1   |
| PLL   | --> | SDR16C5  |
| PLL   | --> | SFTPC    |
| PLL   | --> | SPARC    |
| PLL   | --> | TIMP1    |
| PLL   | --> | TMEM243  |
| PLL   | --> | TSPAN8   |
| PLL   | --> | VSIG2    |
| PLL   | --> | WFDC2    |
| PLS3  | --> | ANXA3    |
| PLS3  | --> | CAV2     |
| PLS3  | --> | CHI3L2   |
| PLS3  | --> | GPC3     |
| PLS3  | --> | LAMP3    |
| PLS3  | --> | MSMO1    |
| PLS3  | --> | MYL9     |
| PLS3  | --> | PLL      |
| PLS3  | --> | SERPINH1 |
| PMP22 | --> | AGR2     |
| PMP22 | --> | CES1     |
| PMP22 | --> | CFD      |
| PMP22 | --> | DAB2     |
| PMP22 | --> | EMP3     |
| PMP22 | --> | FABP5    |
| PMP22 | --> | FHL1     |
| PMP22 | --> | FOSB     |
| PMP22 | --> | VCAN     |
| POSTN | --> | ADH1B    |
| POSTN | --> | C7       |
| POSTN | --> | CDH11    |
| POSTN | --> | CFD      |

|       |     |          |
|-------|-----|----------|
| POSTN | --> | COL14A1  |
| POSTN | --> | COL8A1   |
| POSTN | --> | EMILIN1  |
| POSTN | --> | FBXO32   |
| POSTN | --> | IGFBP4   |
| POSTN | --> | MDK      |
| POSTN | --> | MOXD1    |
| POSTN | --> | PRELP    |
| POSTN | --> | TGFBI    |
| PPA1  | --> | DSTN     |
| PPA1  | --> | MYL12B   |
| PRELP | --> | ADH1B    |
| PRELP | --> | AEBP1    |
| PRELP | --> | C10orf10 |
| PRELP | --> | INMT     |
| PRELP | --> | LTBP4    |
| PRELP | --> | SFRP4    |
| PRELP | --> | TIMP3    |
| PRKCZ | --> | MLLT4    |
| PRSS8 | --> | CDH1     |
| PRSS8 | --> | CLDN1    |
| PRSS8 | --> | EVA1A    |
| PRSS8 | --> | PEG10    |
| PRSS8 | --> | PRKCZ    |
| PSAP  | --> | A2M      |
| PSAP  | --> | APLP2    |
| PSAP  | --> | CREG1    |
| PSAP  | --> | CTSZ     |
| PSAP  | --> | DSTN     |
| PSAP  | --> | FBP1     |
| PSAP  | --> | GRN      |
| PSAP  | --> | LDLR     |
| PSAP  | --> | LGALS1   |
| PSAP  | --> | TMC5     |
| PSAP  | --> | VIM      |
| PTGDS | --> | A2M      |
| PTGDS | --> | APOE     |
| PTGDS | --> | C7       |
| PTGDS | --> | CD9      |
| PTGDS | --> | CXCL12   |
| PTGDS | --> | CYR61    |
| PTGDS | --> | INMT     |

|           |     |               |
|-----------|-----|---------------|
| PTGDS     | --> | TCF21         |
| RAB11FIP1 | --> | CD55          |
| RAB11FIP1 | --> | NEAT1         |
| RAB11FIP1 | --> | SGMS2         |
| RAB11FIP1 | --> | SPINT1        |
| RAB17     | --> | PARM1         |
| RAB25     | --> | AK1           |
| RAB25     | --> | CD24          |
| RAB25     | --> | CDH1          |
| RAB25     | --> | CLDN1         |
| RAB25     | --> | CRNDE         |
| RAB25     | --> | CYP4B1        |
| RAB25     | --> | EGFR          |
| RAB25     | --> | ERBB3         |
| RAB25     | --> | FGGY          |
| RAB25     | --> | FLRT3         |
| RAB25     | --> | MPZL2         |
| RAB25     | --> | OCIAD2        |
| RAB25     | --> | RP11.532F12.5 |
| RAB25     | --> | SMIM22        |
| RAB25     | --> | STARD10       |
| RAB25     | --> | SYTL1         |
| RAB25     | --> | TREM2         |
| RAB25     | --> | TRIB1         |
| RAB25     | --> | TSPAN1        |
| RAB25     | --> | VSIG2         |
| RARRES1   | --> | C3            |
| RARRES1   | --> | SERPING1      |
| RARRES2   | --> | C1R           |
| RARRES2   | --> | C7            |
| RARRES2   | --> | CD63          |
| RARRES2   | --> | CXCL12        |
| RARRES2   | --> | CYR61         |
| RARRES2   | --> | DCN           |
| RARRES2   | --> | EMILIN1       |
| RARRES2   | --> | FBLN1         |
| RARRES2   | --> | GPC3          |
| RARRES2   | --> | LUM           |
| RARRES2   | --> | MFAP4         |
| RARRES2   | --> | MYL9          |
| RARRES2   | --> | NNMT          |
| RARRES2   | --> | OLFML3        |

|             |     |          |
|-------------|-----|----------|
| RARRES2     | --> | PTGDS    |
| RARRES2     | --> | SEPP1    |
| RARRES3     | --> | POLR2L   |
| RNF130      | --> | VIM      |
| RP11.532F12 | --> | MDK      |
| RP11.532F12 | --> | MLLT4    |
| RP11.532F12 | --> | RAB17    |
| RP11.532F12 | --> | STARD10  |
| RPS4Y1      | --> | A2M      |
| RPS4Y1      | --> | ALCAM    |
| RPS4Y1      | --> | APOD     |
| RPS4Y1      | --> | APOE     |
| RPS4Y1      | --> | ARL4D    |
| RPS4Y1      | --> | BRI3     |
| RPS4Y1      | --> | C15orf48 |
| RPS4Y1      | --> | CALM3    |
| RPS4Y1      | --> | CEBPD    |
| RPS4Y1      | --> | CREG1    |
| RPS4Y1      | --> | CYP4B1   |
| RPS4Y1      | --> | DHRS3    |
| RPS4Y1      | --> | FAM105A  |
| RPS4Y1      | --> | FMO2     |
| RPS4Y1      | --> | HSPA1A   |
| RPS4Y1      | --> | IFI6     |
| RPS4Y1      | --> | ITGA2    |
| RPS4Y1      | --> | LGMN     |
| RPS4Y1      | --> | LTBP4    |
| RPS4Y1      | --> | MID1IP1  |
| RPS4Y1      | --> | MLPH     |
| RPS4Y1      | --> | MT.ND1   |
| RPS4Y1      | --> | RARRES1  |
| RPS4Y1      | --> | SFTPC    |
| RPS4Y1      | --> | SNHG8    |
| RTKN2       | --> | ACTB     |
| RTKN2       | --> | ADH1B    |
| RTKN2       | --> | ALCAM    |
| RTKN2       | --> | ANOS1    |
| RTKN2       | --> | ANXA3    |
| RTKN2       | --> | AP2S1    |
| RTKN2       | --> | CA2      |
| RTKN2       | --> | CACNA2D2 |
| RTKN2       | --> | CALD1    |

|       |     |           |
|-------|-----|-----------|
| RTKN2 | --> | CCL20     |
| RTKN2 | --> | CES1      |
| RTKN2 | --> | CFH       |
| RTKN2 | --> | CHI3L2    |
| RTKN2 | --> | CLDN1     |
| RTKN2 | --> | CLIC3     |
| RTKN2 | --> | COL8A1    |
| RTKN2 | --> | CRACR2B   |
| RTKN2 | --> | CTSD      |
| RTKN2 | --> | CTSK      |
| RTKN2 | --> | CXCL14    |
| RTKN2 | --> | EFEMP1    |
| RTKN2 | --> | FAM105A   |
| RTKN2 | --> | FBN1      |
| RTKN2 | --> | FHL1      |
| RTKN2 | --> | FHL2      |
| RTKN2 | --> | FSTL1     |
| RTKN2 | --> | GPC3      |
| RTKN2 | --> | GPX1      |
| RTKN2 | --> | IGSF6     |
| RTKN2 | --> | LDLR      |
| RTKN2 | --> | LGALS3    |
| RTKN2 | --> | LINC01272 |
| RTKN2 | --> | LPCAT1    |
| RTKN2 | --> | LPL       |
| RTKN2 | --> | MEG3      |
| RTKN2 | --> | MRC1      |
| RTKN2 | --> | MT.ND1    |
| RTKN2 | --> | MUC5B     |
| RTKN2 | --> | NNMT      |
| RTKN2 | --> | PCYOX1    |
| RTKN2 | --> | PEBP4     |
| RTKN2 | --> | PLA2G7    |
| RTKN2 | --> | PLAC9     |
| RTKN2 | --> | PLEKHJ1   |
| RTKN2 | --> | PLLP      |
| RTKN2 | --> | PSAP      |
| RTKN2 | --> | SCD       |
| RTKN2 | --> | SERPING1  |
| RTKN2 | --> | SH3BGRL3  |
| RTKN2 | --> | SPARCL1   |
| RTKN2 | --> | TIMP1     |

|         |     |         |
|---------|-----|---------|
| RTKN2   | --> | TMEM45A |
| RTKN2   | --> | TRIB1   |
| RTKN2   | --> | TSPAN8  |
| S100A11 | --> | ACTB    |
| S100A11 | --> | ATP6V1F |
| S100A11 | --> | CAPG    |
| S100A11 | --> | CD63    |
| S100A11 | --> | CEBPD   |
| S100A11 | --> | CST6    |
| S100A11 | --> | CSTB    |
| S100A11 | --> | FOSB    |
| S100A11 | --> | LGALS3  |
| S100A11 | --> | MYL12B  |
| S100A11 | --> | SEPP1   |
| S100A2  | --> | BRI3    |
| S100A2  | --> | CD9     |
| S100A2  | --> | CKB     |
| S100A2  | --> | CXCL1   |
| S100A2  | --> | HES1    |
| S100A2  | --> | IGFBP2  |
| S100A2  | --> | KRT17   |
| S100A2  | --> | LAMB3   |
| S100A2  | --> | SNHG8   |
| S100A2  | --> | SPINT1  |
| SCD     | --> | ATP11A  |
| SCD     | --> | BRI3    |
| SCD     | --> | CYBA    |
| SCD     | --> | MLPH    |
| SCD     | --> | TFRC    |
| SCD     | --> | ZDHHC3  |
| SCEL    | --> | ADGRF5  |
| SCEL    | --> | AGER    |
| SCEL    | --> | CD24    |
| SCEL    | --> | CDH1    |
| SCEL    | --> | CLIC5   |
| SCEL    | --> | COL4A3  |
| SCEL    | --> | COL8A1  |
| SCEL    | --> | CST6    |
| SCEL    | --> | CYP4B1  |
| SCEL    | --> | ETS2    |
| SCEL    | --> | GGTLC1  |
| SCEL    | --> | GKN2    |



|         |     |               |
|---------|-----|---------------|
| SCEL    | --> | HHIP          |
| SCEL    | --> | LAMA3         |
| SCEL    | --> | MYO1B         |
| SCEL    | --> | PRKCZ         |
| SCGB1A1 | --> | CALM2         |
| SCGB1A1 | --> | CEBPD         |
| SCGB1A1 | --> | FOSB          |
| SCGB1A1 | --> | GEM           |
| SCGB1A1 | --> | GSN           |
| SCGB1A1 | --> | HOOK2         |
| SCGB1A1 | --> | MYL9          |
| SCGB1A1 | --> | RPS4Y1        |
| SCGB1A1 | --> | SCGB3A2       |
| SCGB3A1 | --> | ACTB          |
| SCGB3A1 | --> | BPIFB1        |
| SCGB3A1 | --> | DUSP23        |
| SCGB3A1 | --> | RPS4Y1        |
| SCGB3A1 | --> | SCGB1A1       |
| SCGB3A1 | --> | SCGB3A2       |
| SCGB3A1 | --> | SFTPC         |
| SCGB3A1 | --> | TMEM45A       |
| SCGB3A1 | --> | TSC22D1       |
| SCGB3A2 | --> | ARFGEF3       |
| SCGB3A2 | --> | BCAM          |
| SCGB3A2 | --> | CAPN8         |
| SCGB3A2 | --> | CPM           |
| SCGB3A2 | --> | KIAA1324      |
| SCGB3A2 | --> | PEG10         |
| SCGB3A2 | --> | SCNN1B        |
| SCNN1A  | --> | FASN          |
| SCNN1A  | --> | LMO3          |
| SCNN1B  | --> | ERBB3         |
| SCNN1B  | --> | FMO2          |
| SCNN1B  | --> | IGFBP2        |
| SCNN1B  | --> | MAGI3         |
| SCNN1B  | --> | PARM1         |
| SCNN1B  | --> | PDLIM2        |
| SCNN1B  | --> | RP11.532F12.5 |
| SCNN1B  | --> | SCNN1A        |
| SCNN1B  | --> | SFTPC         |
| SCPEP1  | --> | CD9           |
| SCPEP1  | --> | ODC1          |

|          |     |               |
|----------|-----|---------------|
| SDC2     | --> | C15orf48      |
| SDC2     | --> | DSTN          |
| SDC2     | --> | GEM           |
| SDC2     | --> | GSN           |
| SDC2     | --> | LILRB4        |
| SDC2     | --> | LPL           |
| SDC2     | --> | MDK           |
| SDC2     | --> | RAB25         |
| SDC2     | --> | SPP1          |
| SDC4     | --> | ADGRF5        |
| SDC4     | --> | ATP1A1        |
| SDC4     | --> | BRI3          |
| SDC4     | --> | C12orf49      |
| SDC4     | --> | CDH1          |
| SDC4     | --> | SGMS2         |
| SDR16C5  | --> | FASN          |
| SDR16C5  | --> | FGGY          |
| SDR16C5  | --> | FLRT3         |
| SDR16C5  | --> | MFSD2A        |
| SDR16C5  | --> | RP11.532F12.5 |
| SDR16C5  | --> | SEPP1         |
| SDR16C5  | --> | TACC2         |
| SELM     | --> | NGFRAP1       |
| SEMA3B   | --> | EVA1A         |
| SEPP1    | --> | A2M           |
| SEPP1    | --> | C15orf48      |
| SEPP1    | --> | CAPG          |
| SEPP1    | --> | CEBPD         |
| SEPP1    | --> | CFD           |
| SEPP1    | --> | CREG1         |
| SEPP1    | --> | FAM213A       |
| SEPP1    | --> | IGFBP4        |
| SEPP1    | --> | LGMN          |
| SEPP1    | --> | MYC           |
| SEPP1    | --> | ODC1          |
| SEPP1    | --> | PCYOX1        |
| SEPP1    | --> | PLD3          |
| SEPP1    | --> | RARRES1       |
| SEPP1    | --> | SERPING1      |
| SEPP1    | --> | TSC22D1       |
| SEPP1    | --> | VCAN          |
| SERPINA1 | --> | A2M           |

|          |     |          |
|----------|-----|----------|
| SERPINA1 | --> | CD47     |
| SERPINA1 | --> | CTSH     |
| SERPINA1 | --> | CXCL14   |
| SERPINA1 | --> | LIPA     |
| SERPINA1 | --> | NNMT     |
| SERPINA1 | --> | SCD      |
| SERPINA1 | --> | SCGB3A2  |
| SERPINA1 | --> | SDC4     |
| SERPINA1 | --> | TRAM1    |
| SERPINA1 | --> | ZDHHC3   |
| SERPINB5 | --> | FGFBP1   |
| SERPINB5 | --> | FHL2     |
| SERPINB5 | --> | GPX1     |
| SERPINB5 | --> | GSTA1    |
| SERPINB5 | --> | HLA.DMB  |
| SERPINB5 | --> | ITGA2    |
| SERPINB5 | --> | KIAA1324 |
| SERPINB5 | --> | KRT6A    |
| SERPINB5 | --> | LAMA3    |
| SERPINB5 | --> | LPCAT1   |
| SERPINB5 | --> | MEG3     |
| SERPINB5 | --> | MYRF     |
| SERPINB5 | --> | RAB25    |
| SERPING1 | --> | SCPEP1   |
| SERPING1 | --> | SELM     |
| SFRP2    | --> | APOD     |
| SFRP2    | --> | C3       |
| SFRP2    | --> | CCDC80   |
| SFRP2    | --> | COL14A1  |
| SFRP2    | --> | CXCL12   |
| SFRP2    | --> | FGF7     |
| SFRP2    | --> | GPC3     |
| SFRP2    | --> | GPNMB    |
| SFRP2    | --> | IGF1     |
| SFRP2    | --> | IGFBP4   |
| SFRP2    | --> | MEG3     |
| SFRP2    | --> | SFRP4    |
| SFRP4    | --> | APOD     |
| SFRP4    | --> | CD55     |
| SFRP4    | --> | CES1     |
| SFRP4    | --> | CLTB     |
| SFRP4    | --> | ELN      |

|        |     |          |
|--------|-----|----------|
| SFTPA1 | --> | AGR2     |
| SFTPA1 | --> | AGR3     |
| SFTPA1 | --> | AK1      |
| SFTPA1 | --> | ASPH     |
| SFTPA1 | --> | ATP1A1   |
| SFTPA1 | --> | CTSE     |
| SFTPA1 | --> | CTSH     |
| SFTPA1 | --> | DMBT1    |
| SFTPA1 | --> | LPCAT1   |
| SFTPA1 | --> | MBIP     |
| SFTPA1 | --> | NEAT1    |
| SFTPA1 | --> | PARM1    |
| SFTPA1 | --> | RARRES1  |
| SFTPA1 | --> | SCGB1A1  |
| SFTPA1 | --> | SCGB3A2  |
| SFTPA1 | --> | SDC4     |
| SFTPA1 | --> | SELM     |
| SFTPA1 | --> | SFTPC    |
| SFTPA1 | --> | SGMS2    |
| SFTPA1 | --> | SLC22A31 |
| SFTPA1 | --> | WFDC2    |
| SFTPC  | --> | FMO2     |
| SFTPD  | --> | ABCA3    |
| SFTPD  | --> | ADGRF5   |
| SFTPD  | --> | ALPL     |
| SFTPD  | --> | APLP2    |
| SFTPD  | --> | CADM1    |
| SFTPD  | --> | CTSH     |
| SFTPD  | --> | LMO3     |
| SFTPD  | --> | LRRK2    |
| SFTPD  | --> | PEBP4    |
| SFTPD  | --> | SERPINA1 |
| SFTPD  | --> | SFTPA1   |
| SFTPD  | --> | SFTPC    |
| SFTPD  | --> | SLC22A31 |
| SFTPD  | --> | SPTSSA   |
| SFTPD  | --> | SUSD2    |
| SFTPD  | --> | TACC2    |
| SFTPD  | --> | WIF1     |
| SGK1   | --> | ATF3     |
| SGK1   | --> | CXCL2    |
| SGK1   | --> | FOSB     |

|          |     |          |
|----------|-----|----------|
| SGK1     | --> | NEAT1    |
| SGK1     | --> | SLC16A10 |
| SGK1     | --> | TRIB1    |
| SGMS2    | --> | CD55     |
| SGMS2    | --> | CTNNA1   |
| SGMS2    | --> | ODC1     |
| SH3BGRL3 | --> | ACTB     |
| SH3BGRL3 | --> | AP2S1    |
| SH3BGRL3 | --> | ATP6V0B  |
| SH3BGRL3 | --> | ATP6V1F  |
| SH3BGRL3 | --> | BRI3     |
| SH3BGRL3 | --> | CALM3    |
| SH3BGRL3 | --> | CD68     |
| SH3BGRL3 | --> | CES1     |
| SH3BGRL3 | --> | CST6     |
| SH3BGRL3 | --> | CSTB     |
| SH3BGRL3 | --> | CTSB     |
| SH3BGRL3 | --> | EMP3     |
| SH3BGRL3 | --> | FBP1     |
| SH3BGRL3 | --> | GPX1     |
| SH3BGRL3 | --> | GSTO1    |
| SH3BGRL3 | --> | H2AFY    |
| SH3BGRL3 | --> | LAPTM5   |
| SH3BGRL3 | --> | LGALS1   |
| SH3BGRL3 | --> | LIMS1    |
| SH3BGRL3 | --> | NEAT1    |
| SH3BGRL3 | --> | RPS4Y1   |
| SH3BGRL3 | --> | S100A11  |
| SH3BGRL3 | --> | SCPEP1   |
| SH3BGRL3 | --> | SEPP1    |
| SH3BGRL3 | --> | TIMP1    |
| SH3BGRL3 | --> | TSC22D1  |
| SLC16A10 | --> | IGSF6    |
| SLC16A10 | --> | LIMS1    |
| SLC16A10 | --> | TFRC     |
| SLC22A31 | --> | ADGRF5   |
| SLC22A31 | --> | AGR2     |
| SLC22A31 | --> | AGR3     |
| SLC22A31 | --> | CTSE     |
| SLC22A31 | --> | LPCAT1   |
| SLC22A31 | --> | PEG10    |
| SLC22A31 | --> | PRSS8    |

|         |     |               |
|---------|-----|---------------|
| SLC6A14 | --> | ALPL          |
| SLC6A14 | --> | ARFGEF3       |
| SLC6A14 | --> | BCAM          |
| SLC6A14 | --> | C12orf49      |
| SLC6A14 | --> | CCL20         |
| SLC6A14 | --> | CSTB          |
| SLC6A14 | --> | EVA1A         |
| SLC6A14 | --> | FGFBP1        |
| SLC6A14 | --> | FGGY          |
| SLC6A14 | --> | FOSB          |
| SLC6A14 | --> | ITGA2         |
| SLC6A14 | --> | MPZL2         |
| SLC6A14 | --> | MSMO1         |
| SLC6A14 | --> | MYO1B         |
| SLC6A14 | --> | SDC4          |
| SLC6A14 | --> | SDR16C5       |
| SLC6A14 | --> | SEPP1         |
| SLC6A14 | --> | SGMS2         |
| SLC6A14 | --> | TIMP1         |
| SLC6A14 | --> | TMC5          |
| SMIM22  | --> | ARFGEF3       |
| SMIM22  | --> | CDH1          |
| SMIM22  | --> | CLDN3         |
| SMIM22  | --> | CRACR2B       |
| SMIM22  | --> | MLPH          |
| SMIM22  | --> | RARRES3       |
| SMIM22  | --> | RP11.532F12.5 |
| SOX9    | --> | CLDN1         |
| SOX9    | --> | FBXO32        |
| SOX9    | --> | FLRT3         |
| SOX9    | --> | LDLR          |
| SOX9    | --> | MFSD2A        |
| SOX9    | --> | TSC22D1       |
| SPARC   | --> | APOC1         |
| SPARC   | --> | APOE          |
| SPARC   | --> | CALM2         |
| SPARC   | --> | CALM3         |
| SPARC   | --> | CCL18         |
| SPARC   | --> | CD63          |
| SPARC   | --> | CFD           |
| SPARC   | --> | CP            |
| SPARC   | --> | CTSD          |

|         |     |          |
|---------|-----|----------|
| SPARC   | --> | CTSK     |
| SPARC   | --> | CXCL2    |
| SPARC   | --> | DUSP23   |
| SPARC   | --> | ETS2     |
| SPARC   | --> | HEXB     |
| SPARC   | --> | HMGB3    |
| SPARC   | --> | HSPA1A   |
| SPARC   | --> | IFI6     |
| SPARC   | --> | LCN2     |
| SPARC   | --> | LGALS1   |
| SPARC   | --> | LPL      |
| SPARC   | --> | PMP22    |
| SPARC   | --> | RARRES1  |
| SPARC   | --> | SDC2     |
| SPARC   | --> | SDR16C5  |
| SPARC   | --> | TMEM243  |
| SPARC   | --> | TSPAN8   |
| SPARCL1 | --> | A2M      |
| SPARCL1 | --> | AP2S1    |
| SPARCL1 | --> | ASAH1    |
| SPARCL1 | --> | C10orf10 |
| SPARCL1 | --> | C7       |
| SPARCL1 | --> | CALD1    |
| SPARCL1 | --> | CAV2     |
| SPARCL1 | --> | CDH11    |
| SPARCL1 | --> | CFH      |
| SPARCL1 | --> | CXCL12   |
| SPARCL1 | --> | DUSP23   |
| SPARCL1 | --> | GPC3     |
| SPARCL1 | --> | GPNMB    |
| SPARCL1 | --> | GPX1     |
| SPARCL1 | --> | LGALS3   |
| SPARCL1 | --> | MGP      |
| SPARCL1 | --> | MT.ND1   |
| SPARCL1 | --> | PLAC9    |
| SPARCL1 | --> | PLS3     |
| SPARCL1 | --> | PMP22    |
| SPARCL1 | --> | PRELP    |
| SPARCL1 | --> | PTGDS    |
| SPARCL1 | --> | S100A11  |
| SPARCL1 | --> | TIMP3    |
| SPARCL1 | --> | VCAN     |

|         |     |          |
|---------|-----|----------|
| SPARCL1 | --> | VIM      |
| SPARCL1 | --> | WFDC2    |
| SPP1    | --> | ANKRD29  |
| SPP1    | --> | BPIFB1   |
| SPP1    | --> | C15orf48 |
| SPP1    | --> | CA2      |
| SPP1    | --> | CALM3    |
| SPP1    | --> | CD63     |
| SPP1    | --> | CFD      |
| SPP1    | --> | CPM      |
| SPP1    | --> | MGLL     |
| SPP1    | --> | NEAT1    |
| SPP1    | --> | SCGB3A1  |
| SPP1    | --> | SERPINA1 |
| SPP1    | --> | SLC16A10 |
| SPP1    | --> | TREM2    |
| SPP1    | --> | VCAN     |
| STARD10 | --> | MT.ND1   |
| SUSD2   | --> | AGR3     |
| SUSD2   | --> | BCAM     |
| SUSD2   | --> | CLDN3    |
| SUSD2   | --> | CTSE     |
| SUSD2   | --> | FLRT3    |
| SUSD2   | --> | KIAA1324 |
| SUSD2   | --> | MAGI3    |
| SUSD2   | --> | RAB17    |
| SUSD2   | --> | SEMA3B   |
| SYT8    | --> | ALDH3A1  |
| SYT8    | --> | CAPN8    |
| SYT8    | --> | CD24     |
| SYT8    | --> | CYP4B1   |
| SYT8    | --> | EGFR     |
| SYT8    | --> | FLRT3    |
| SYT8    | --> | HES1     |
| SYT8    | --> | HOOK2    |
| SYT8    | --> | IGFBP2   |
| SYT8    | --> | ITGA2    |
| SYT8    | --> | LAMB3    |
| SYT8    | --> | S100A2   |
| SYT8    | --> | SCPEP1   |
| SYT8    | --> | SOX9     |
| SYT8    | --> | SYTL1    |



|       |     |               |
|-------|-----|---------------|
| SYTL1 | --> | ARFGEF3       |
| SYTL1 | --> | CRNDE         |
| SYTL1 | --> | HOOK2         |
| SYTL1 | --> | KRT17         |
| TACC2 | --> | AK1           |
| TACC2 | --> | ATP11A        |
| TACC2 | --> | CRNDE         |
| TACC2 | --> | LDLR          |
| TACC2 | --> | MYO1B         |
| TACC2 | --> | RAB17         |
| TACC2 | --> | RP11.532F12.5 |
| TAGLN | --> | MYL9          |
| TCF21 | --> | A2M           |
| TCF21 | --> | CDH11         |
| TCF21 | --> | CES1          |
| TCF21 | --> | CXCL12        |
| TCF21 | --> | DKK3          |
| TCF21 | --> | FBLN2         |
| TCF21 | --> | GPC3          |
| TCF21 | --> | INMT          |
| TCF21 | --> | LTBP1         |
| TCF21 | --> | LTBP2         |
| TCF21 | --> | LY96          |
| TCF21 | --> | MOXD1         |
| TCF21 | --> | NNMT          |
| TCF21 | --> | PLAC9         |
| TCF21 | --> | SFRP4         |
| TCF21 | --> | TIMP3         |
| TFF3  | --> | ALDH3A1       |
| TFF3  | --> | BPIFB1        |
| TFF3  | --> | CAV1          |
| TFF3  | --> | CXCL1         |
| TFF3  | --> | KIAA1324      |
| TFF3  | --> | TMC5          |
| TFF3  | --> | VSIG2         |
| TGFBI | --> | ACTB          |
| TGFBI | --> | C3            |
| TGFBI | --> | CFD           |
| TGFBI | --> | CTSZ          |
| TGFBI | --> | CYP27A1       |
| TGFBI | --> | GSN           |
| TGFBI | --> | TREM2         |

|       |     |          |
|-------|-----|----------|
| THY1  | --> | ADH1B    |
| THY1  | --> | AK1      |
| THY1  | --> | AP2S1    |
| THY1  | --> | C10orf10 |
| THY1  | --> | CFD      |
| THY1  | --> | CLIC3    |
| THY1  | --> | COL14A1  |
| THY1  | --> | COL5A2   |
| THY1  | --> | DSTN     |
| THY1  | --> | FBLN2    |
| THY1  | --> | FSTL1    |
| THY1  | --> | HTRA3    |
| THY1  | --> | IGF1     |
| THY1  | --> | IGFBP4   |
| THY1  | --> | ISLR     |
| THY1  | --> | MFAP4    |
| THY1  | --> | MOXD1    |
| THY1  | --> | OLFML3   |
| THY1  | --> | PDLIM3   |
| THY1  | --> | PLAC9    |
| THY1  | --> | SFRP2    |
| THY1  | --> | SFRP4    |
| THY1  | --> | SH3BGRL3 |
| THY1  | --> | SPARCL1  |
| THY1  | --> | TAGLN    |
| TIMP1 | --> | APOC1    |
| TIMP1 | --> | BRI3     |
| TIMP1 | --> | C12orf49 |
| TIMP1 | --> | CA2      |
| TIMP1 | --> | CCL18    |
| TIMP1 | --> | CD63     |
| TIMP1 | --> | CPM      |
| TIMP1 | --> | CTSE     |
| TIMP1 | --> | CTSL     |
| TIMP1 | --> | CXCL2    |
| TIMP1 | --> | EMP3     |
| TIMP1 | --> | GCHFR    |
| TIMP1 | --> | HLA.DMB  |
| TIMP1 | --> | HSPA1A   |
| TIMP1 | --> | IER3     |
| TIMP1 | --> | IGFBP2   |
| TIMP1 | --> | LGALS1   |

|         |     |           |
|---------|-----|-----------|
| TIMP1   | --> | LPL       |
| TIMP1   | --> | MGLL      |
| TIMP1   | --> | RAB11FIP1 |
| TIMP1   | --> | SCD       |
| TIMP1   | --> | SDC4      |
| TIMP1   | --> | VCAN      |
| TIMP1   | --> | VIM       |
| TIMP3   | --> | CAV1      |
| TIMP3   | --> | CD63      |
| TIMP3   | --> | CTGF      |
| TIMP3   | --> | GSN       |
| TIMP3   | --> | MGLL      |
| TIMP3   | --> | MOXD1     |
| TIMP3   | --> | SDC2      |
| TIMP3   | --> | TAGLN     |
| TMC5    | --> | ARFGEF3   |
| TMC5    | --> | C3        |
| TMC5    | --> | ERBB3     |
| TMC5    | --> | HOOK2     |
| TMC5    | --> | LDLR      |
| TMC5    | --> | MLPH      |
| TMC5    | --> | NCOA7     |
| TMC5    | --> | RAB11FIP1 |
| TMC5    | --> | TACC2     |
| TMEM243 | --> | C4BPA     |
| TMEM243 | --> | HHIP      |
| TMEM243 | --> | LAMP3     |
| TMEM243 | --> | ODC1      |
| TMEM243 | --> | PLA2G1B   |
| TMEM243 | --> | ZDHHC3    |
| TMEM45A | --> | APOD      |
| TMEM45A | --> | MDK       |
| TMEM45A | --> | SELM      |
| TNNC1   | --> | AGER      |
| TNNC1   | --> | ANKRD29   |
| TNNC1   | --> | ANOS1     |
| TNNC1   | --> | ANXA3     |
| TNNC1   | --> | CADM1     |
| TNNC1   | --> | CALM2     |
| TNNC1   | --> | CAV1      |
| TNNC1   | --> | CAV2      |
| TNNC1   | --> | CKB       |

|       |     |           |
|-------|-----|-----------|
| TNNC1 | --> | CLIC5     |
| TNNC1 | --> | CST6      |
| TNNC1 | --> | CTSE      |
| TNNC1 | --> | EFEMP1    |
| TNNC1 | --> | FMO2      |
| TNNC1 | --> | GKN2      |
| TNNC1 | --> | KRT15     |
| TNNC1 | --> | LAMA3     |
| TNNC1 | --> | MYL9      |
| TNNC1 | --> | PEBP4     |
| TNNC1 | --> | PEG10     |
| TNNC1 | --> | PLA2G1B   |
| TNNC1 | --> | PLLP      |
| TNNC1 | --> | PRSS8     |
| TNNC1 | --> | RAB25     |
| TNNC1 | --> | RARRES3   |
| TNNC1 | --> | SCEL      |
| TNNC1 | --> | SFTPD     |
| TNNC1 | --> | SLC22A31  |
| TNNC1 | --> | SPARCL1   |
| TNNC1 | --> | SUSD2     |
| TNNC1 | --> | TSPAN8    |
| TPM2  | --> | ELN       |
| TPM2  | --> | LGALS1    |
| TPM2  | --> | MDK       |
| TPM2  | --> | MYL9      |
| TPM2  | --> | TAGLN     |
| TPM2  | --> | TIMP1     |
| TREM2 | --> | A2M       |
| TREM2 | --> | AK1       |
| TREM2 | --> | APOE      |
| TREM2 | --> | CALM3     |
| TREM2 | --> | CAPG      |
| TREM2 | --> | CD9       |
| TREM2 | --> | CTSH      |
| TREM2 | --> | CTSZ      |
| TREM2 | --> | GSN       |
| TREM2 | --> | HLA.DMA   |
| TREM2 | --> | LILRB4    |
| TREM2 | --> | LINC01272 |
| TREM2 | --> | LIPA      |
| TREM2 | --> | MDK       |

|         |     |          |
|---------|-----|----------|
| TREM2   | --> | PLA2G7   |
| TREM2   | --> | PPT1     |
| TREM2   | --> | STARD10  |
| TREM2   | --> | TRIB1    |
| TRIB1   | --> | ATF3     |
| TRIB1   | --> | CXCL1    |
| TRIB1   | --> | FOSB     |
| TRIB1   | --> | GEM      |
| TRIB1   | --> | NCOA7    |
| TSC22D1 | --> | CEBPD    |
| TSC22D1 | --> | RNF145   |
| TSC22D1 | --> | SCPEP1   |
| TSPAN1  | --> | CLDN3    |
| TSPAN1  | --> | CXADR    |
| TSPAN1  | --> | CYBA     |
| TSPAN1  | --> | ERBB3    |
| TSPAN1  | --> | FAM105A  |
| TSPAN1  | --> | GSN      |
| TSPAN1  | --> | HPCAL1   |
| TSPAN1  | --> | KRT15    |
| TSPAN1  | --> | MDK      |
| TSPAN1  | --> | OCIAD2   |
| TSPAN1  | --> | PRSS8    |
| TSPAN1  | --> | S100A2   |
| TSPAN1  | --> | SCNN1A   |
| TSPAN1  | --> | SCNN1B   |
| TSPAN1  | --> | SMIM22   |
| TSPAN1  | --> | SYT8     |
| TSPAN1  | --> | SYTL1    |
| TSPAN1  | --> | TFF3     |
| TSPAN1  | --> | VSIG2    |
| TSPAN8  | --> | AGR2     |
| TSPAN8  | --> | CXCL1    |
| TSPAN8  | --> | CXCL14   |
| TSPAN8  | --> | EMP3     |
| TSPAN8  | --> | FMO2     |
| TSPAN8  | --> | IGFBP4   |
| TSPAN8  | --> | KIAA1324 |
| TSPAN8  | --> | PLD3     |
| TSPAN8  | --> | RARRES1  |
| TSPAN8  | --> | SCGB1A1  |
| TSPAN8  | --> | SCGB3A2  |

|        |     |           |
|--------|-----|-----------|
| TSPAN8 | --> | SCNN1B    |
| TSPAN8 | --> | SDC4      |
| TSPAN8 | --> | SFRP4     |
| TSPAN8 | --> | TMEM45A   |
| TYMP   | --> | IFI6      |
| TYROBP | --> | ACP5      |
| TYROBP | --> | AGR2      |
| TYROBP | --> | AP2S1     |
| TYROBP | --> | APOC1     |
| TYROBP | --> | ATP6V0B   |
| TYROBP | --> | CCL18     |
| TYROBP | --> | CD68      |
| TYROBP | --> | CFH       |
| TYROBP | --> | CHI3L2    |
| TYROBP | --> | CLIC3     |
| TYROBP | --> | CLIC5     |
| TYROBP | --> | COL1A1    |
| TYROBP | --> | COL4A3    |
| TYROBP | --> | CYBA      |
| TYROBP | --> | DAPK2     |
| TYROBP | --> | DSTN      |
| TYROBP | --> | EFEMP1    |
| TYROBP | --> | EMILIN1   |
| TYROBP | --> | EMP3      |
| TYROBP | --> | FCER1G    |
| TYROBP | --> | GPX1      |
| TYROBP | --> | H2AFY     |
| TYROBP | --> | KRT15     |
| TYROBP | --> | LAPTM5    |
| TYROBP | --> | LINC01272 |
| TYROBP | --> | LPL       |
| TYROBP | --> | LST1      |
| TYROBP | --> | LYZ       |
| TYROBP | --> | MGP       |
| TYROBP | --> | MS4A7     |
| TYROBP | --> | MSR1      |
| TYROBP | --> | MYRF      |
| TYROBP | --> | PLS3      |
| TYROBP | --> | PSAP      |
| TYROBP | --> | RNF130    |
| TYROBP | --> | SFRP2     |
| TYROBP | --> | SH3BGRL3  |

|        |     |               |
|--------|-----|---------------|
| TYROBP | --> | SPARCL1       |
| TYROBP | --> | TSPAN8        |
| TYROBP | --> | TYMP          |
| TYROBP | --> | WFDC2         |
| VCAN   | --> | CD9           |
| VCAN   | --> | CXCL14        |
| VCAN   | --> | DHRS3         |
| VCAN   | --> | FAM213A       |
| VCAN   | --> | FHL1          |
| VCAN   | --> | GLUL          |
| VCAN   | --> | GRN           |
| VCAN   | --> | RNF145        |
| VIM    | --> | ACTB          |
| VIM    | --> | AGR2          |
| VIM    | --> | BLVRB         |
| VIM    | --> | COX6C         |
| VIM    | --> | CTSH          |
| VIM    | --> | CTSZ          |
| VIM    | --> | GLUL          |
| VIM    | --> | KRT15         |
| VIM    | --> | LGALS3        |
| VIM    | --> | LPCAT1        |
| VIM    | --> | MPZL2         |
| VIM    | --> | PLA2G7        |
| VIM    | --> | POLR2L        |
| VIM    | --> | SDC2          |
| VIM    | --> | SFTPD         |
| VIM    | --> | TGFBI         |
| VIM    | --> | TRIB1         |
| VIM    | --> | WFDC2         |
| VSIG2  | --> | ALDH3A1       |
| VSIG2  | --> | CXCL1         |
| VSIG2  | --> | RAB17         |
| VSIG2  | --> | RP11.532F12.5 |
| VSIG2  | --> | SPINT1        |
| VSIG2  | --> | STARD10       |
| VSIG4  | --> | ACP5          |
| VSIG4  | --> | C15orf48      |
| VSIG4  | --> | CD14          |
| VSIG4  | --> | CD68          |
| VSIG4  | --> | CYBB          |
| VSIG4  | --> | FBP1          |

|       |     |               |
|-------|-----|---------------|
| VSIG4 | --> | GSTA1         |
| VSIG4 | --> | HEXB          |
| VSIG4 | --> | HLA.DMA       |
| VSIG4 | --> | HLA.DRB1      |
| VSIG4 | --> | LAPTM5        |
| VSIG4 | --> | LST1          |
| VSIG4 | --> | LYZ           |
| VSIG4 | --> | MARCO         |
| VSIG4 | --> | PLA2G7        |
| WFDC2 | --> | AGR3          |
| WFDC2 | --> | ASAH1         |
| WFDC2 | --> | BCAM          |
| WFDC2 | --> | CD24          |
| WFDC2 | --> | CD55          |
| WFDC2 | --> | CD9           |
| WFDC2 | --> | CLDN3         |
| WFDC2 | --> | CLIC3         |
| WFDC2 | --> | CRNDE         |
| WFDC2 | --> | CSTB          |
| WFDC2 | --> | CTSE          |
| WFDC2 | --> | DAB2          |
| WFDC2 | --> | MDK           |
| WFDC2 | --> | MLPH          |
| WFDC2 | --> | MPZL2         |
| WFDC2 | --> | MYL12B        |
| WFDC2 | --> | OCIAD2        |
| WFDC2 | --> | RAB25         |
| WFDC2 | --> | RP11.532F12.5 |
| WFDC2 | --> | S100A11       |
| WFDC2 | --> | SCGB1A1       |
| WFDC2 | --> | SCGB3A1       |
| WFDC2 | --> | SDC4          |
| WFDC2 | --> | SMIM22        |
| WFDC2 | --> | SPINT1        |
| WFDC2 | --> | STARD10       |
| WFDC2 | --> | SUSD2         |
| WFDC2 | --> | TFF3          |
| WFDC2 | --> | TMEM45A       |
| WFDC2 | --> | TSPAN1        |
| WFDC2 | --> | VCAN          |
| WIF1  | --> | CADM1         |
| WIF1  | --> | CAPN8         |



|       |     |        |
|-------|-----|--------|
| WIF1  | --> | CPM    |
| WIF1  | --> | EVA1A  |
| WIF1  | --> | LMO3   |
| ZDHC3 | --> | HPCAL1 |

**TABLE S10 Gene Ontology Terms associated with macrophage populations****CONTROL FABP4 macrophages (60 genes, >3-fold upregulation compared to all other cells)**

| GO biological process complete                 | Genes in processs | Genes in list | Fold Enrichment | FDR      |
|------------------------------------------------|-------------------|---------------|-----------------|----------|
| lipid localization (GO:0010876)                | 317               | 8             | 9.14            | 1.53E-02 |
| fatty acid metabolic process (GO:0006631)      | 312               | 8             | 9.28            | 2.04E-02 |
| synapse pruning (GO:0098883)                   | 10                | 3 > 100       |                 | 2.20E-02 |
| lipid transport (GO:0006869)                   | 295               | 8             | 9.82            | 2.72E-02 |
| cellular lipid metabolic process (GO:0044255)  | 948               | 12            | 4.58            | 3.06E-02 |
| regulation of cholesterol storage (GO:0010885) | 15                | 3             | 72.4            | 4.14E-02 |
| lipid metabolic process (GO:0006629)           | 1195              | 13            | 3.94            | 4.34E-02 |

**Lipid Localization (GO:0010876)**

|        |                                                                 |
|--------|-----------------------------------------------------------------|
| PPARG  | Peroxisome proliferator-activated receptor gamma;PPARG;ortholog |
| MSR1   | Macrophage scavenger receptor types I and II;MSR1;ortholog      |
| APOC2  | Apolipoprotein C-II;APOC2;ortholog                              |
| FABP3  | Fatty acid-binding protein, heart;FABP3;ortholog                |
| FABP4  | Fatty acid-binding protein, adipocyte;FABP4;ortholog            |
| ATP10A | Probable phospholipid-transporting ATPase VA;ATP10A;ortholog    |
| RBP4   | Retinol-binding protein 4;RBP4;ortholog                         |

**CONTROL SPP1 macrophages (16 genes >3-fold upregulated compared to all other cells)**

| GO biological process complete                                | Genes in processs | Genes in list | Fold Enrichment | FDR      |
|---------------------------------------------------------------|-------------------|---------------|-----------------|----------|
| regulation of plasma lipoprotein particle levels (GO:0097006) | 73                | 4             | 67.67           | 6.05E-03 |
| inflammatory response (GO:0006954)                            | 485               | 6             | 15.28           | 1.24E-02 |
| response to stress (GO:0006950)                               | 3484              | 11            | 3.9             | 3.24E-02 |
| positive regulation of blood vessel diameter (GO:0097755)     | 57                | 3             | 65              | 3.30E-02 |
| extracellular structure organization (GO:0043062)             | 381               | 5             | 16.21           | 3.33E-02 |
| positive regulation of lipid transport (GO:0032370)           | 61                | 3             | 60.74           | 3.51E-02 |
| ion homeostasis (GO:0050801)                                  | 779               | 6             | 9.51            | 3.67E-02 |
| protein-lipid complex subunit organization (GO:0071825)       | 49                | 3             | 75.62           | 3.75E-02 |

|                                                              |    |   |       |          |
|--------------------------------------------------------------|----|---|-------|----------|
| regulation of Cdc42 protein signal transduction (GO:0032489) | 7  | 2 | > 100 | 3.88E-02 |
| plasma lipoprotein particle organization (GO:0071827)        | 45 | 3 | 82.34 | 3.92E-02 |

#### Regulation of plasma lipoprotein particle levels (GO:0097006)

|        |                                                            |
|--------|------------------------------------------------------------|
| APOE   | Apolipoprotein E;APOE;ortholog                             |
| HMOX1  | Heme oxygenase 1;HMOX1;ortholog                            |
| PLA2G7 | Platelet-activating factor acetylhydrolase;PLA2G7;ortholog |
| ABCA1  | ATP-binding cassette sub-family A member 1;ABCA1;ortholog  |

#### Response to stress (GO:0006950)

|          |                                                                     |
|----------|---------------------------------------------------------------------|
| SIGLEC10 | Sialic acid-binding Ig-like lectin 10;SIGLEC10;ortholog             |
| KCNMA1   | Calcium-activated potassium channel subunit alpha-1;KCNMA1;ortholog |
| APOE     | Apolipoprotein E;APOE;ortholog                                      |
| CCL13    | C-C motif chemokine 13;CCL13;ortholog                               |
| CCL18    | C-C motif chemokine 18;CCL18;ortholog                               |
| FPR3     | N-formyl peptide receptor 3;FPR3;ortholog                           |
| HMOX1    | Heme oxygenase 1;HMOX1;ortholog                                     |
| TMIGD3   | Transmembrane domain-containing protein TMIGD3;TMIGD3;ortholog      |
| SPP1     | Osteopontin;SPP1;ortholog                                           |
| ABCA1    | ATP-binding cassette sub-family A member 1;ABCA1;ortholog           |
| MERTK    | Tyrosine-protein kinase Mer;MERTK;ortholog                          |

---

#### CONTROL FCN1 macrophages (62 genes >3-fold upregulated compared to all other cells)

| GO biological process complete                                | Genes in processs | Genes in list | Fold Enrichment | FDR      |
|---------------------------------------------------------------|-------------------|---------------|-----------------|----------|
| immune response (GO:0006955)                                  | 1827              | 37            | 7.09            | 3.84E-20 |
| immune system process (GO:0002376)                            | 2740              | 41            | 5.24            | 5.65E-19 |
| defense response (GO:0006952)                                 | 1320              | 32            | 8.48            | 6.97E-19 |
| myeloid leukocyte activation (GO:0002274)                     | 573               | 21            | 12.82           | 1.53E-14 |
| neutrophil activation involved in immune response (GO:000228) | 487               | 20            | 14.37           | 1.61E-14 |
| neutrophil activation (GO:0042119)                            | 496               | 20            | 14.11           | 1.62E-14 |
| granulocyte activation (GO:0036230)                           | 501               | 20            | 13.97           | 1.71E-14 |
| inflammatory response (GO:0006954)                            | 485               | 20            | 14.43           | 1.86E-14 |

|                                                               |      |    |       |          |
|---------------------------------------------------------------|------|----|-------|----------|
| myeloid cell activation involved in immune response (GO:00022 | 518  | 20 | 13.51 | 2.32E-14 |
| regulated exocytosis (GO:0045055)                             | 694  | 22 | 11.09 | 2.39E-14 |
| myeloid leukocyte mediated immunity (GO:0002444)              | 515  | 20 | 13.59 | 2.54E-14 |
| leukocyte activation involved in immune response (GO:0002366) | 614  | 21 | 11.97 | 2.95E-14 |
| cell activation involved in immune response (GO:0002263)      | 618  | 21 | 11.89 | 3.09E-14 |
| cell activation (GO:0001775)                                  | 1048 | 25 | 8.35  | 3.86E-14 |
| neutrophil degranulation (GO:0043312)                         | 483  | 19 | 13.77 | 8.63E-14 |
| response to stress (GO:0006950)                               | 3484 | 39 | 3.92  | 9.13E-14 |
| secretion (GO:0046903)                                        | 1103 | 25 | 7.93  | 1.03E-13 |
| neutrophil mediated immunity (GO:0002446)                     | 494  | 19 | 13.46 | 1.08E-13 |
| secretion by cell (GO:0032940)                                | 989  | 24 | 8.49  | 1.09E-13 |
| exocytosis (GO:0006887)                                       | 782  | 22 | 9.84  | 1.35E-13 |
| leukocyte degranulation (GO:0043299)                          | 505  | 19 | 13.17 | 1.45E-13 |
| leukocyte activation (GO:0045321)                             | 902  | 23 | 8.92  | 1.66E-13 |
| immune effector process (GO:0002252)                          | 1072 | 24 | 7.83  | 5.02E-13 |
| regulation of response to external stimulus (GO:0032101)      | 761  | 20 | 9.2   | 1.25E-11 |
| leukocyte mediated immunity (GO:0002443)                      | 760  | 20 | 9.21  | 1.27E-11 |
| regulation of immune response (GO:0050776)                    | 1123 | 23 | 7.17  | 1.39E-11 |
| regulation of immune system process (GO:0002682)              | 1629 | 26 | 5.59  | 4.69E-11 |
| positive regulation of cytokine production (GO:0001819)       | 440  | 16 | 12.72 | 6.36E-11 |
| positive regulation of immune system process (GO:0002684)     | 1130 | 22 | 6.81  | 1.49E-10 |
| regulation of response to stress (GO:0080134)                 | 1456 | 24 | 5.77  | 2.76E-10 |
| regulation of cytokine production (GO:0001817)                | 685  | 18 | 9.2   | 2.81E-10 |
| regulation of response to stimulus (GO:0048583)               | 4388 | 38 | 3.03  | 7.60E-10 |
| regulation of defense response (GO:0031347)                   | 744  | 18 | 8.47  | 9.90E-10 |
| response to external stimulus (GO:0009605)                    | 2076 | 27 | 4.55  | 1.26E-09 |
| response to stimulus (GO:0050896)                             | 8349 | 50 | 2.1   | 3.44E-09 |
| regulation of cytokine secretion (GO:0050707)                 | 195  | 11 | 19.74 | 5.95E-09 |
| response to bacterium (GO:0009617)                            | 681  | 16 | 8.22  | 2.89E-08 |
| positive regulation of response to stimulus (GO:0048584)      | 2399 | 27 | 3.94  | 3.18E-08 |
| response to other organism (GO:0051707)                       | 957  | 18 | 6.58  | 4.88E-08 |
| response to external biotic stimulus (GO:0043207)             | 959  | 18 | 6.57  | 4.91E-08 |
| positive regulation of immune response (GO:0050778)           | 843  | 17 | 7.06  | 6.00E-08 |
| response to biotic stimulus (GO:0009607)                      | 985  | 18 | 6.39  | 7.00E-08 |

|                                                                  |      |    |       |          |
|------------------------------------------------------------------|------|----|-------|----------|
| regulation of inflammatory response (GO:0050727)                 | 329  | 12 | 12.76 | 7.05E-08 |
| positive regulation of cytokine secretion (GO:0050715)           | 132  | 9  | 23.86 | 8.32E-08 |
| chemotaxis (GO:0006935)                                          | 539  | 14 | 9.09  | 1.27E-07 |
| taxis (GO:0042330)                                               | 542  | 14 | 9.04  | 1.33E-07 |
| cell surface receptor signaling pathway (GO:0007166)             | 2441 | 26 | 3.73  | 2.31E-07 |
| positive regulation of response to external stimulus (GO:003210) | 304  | 11 | 12.66 | 4.15E-07 |
| regulation of proteolysis (GO:0030162)                           | 720  | 15 | 7.29  | 4.81E-07 |
| innate immune response (GO:0045087)                              | 752  | 15 | 6.98  | 8.41E-07 |

### Immune response (GO:0006955)

|          |                                                                             |
|----------|-----------------------------------------------------------------------------|
| THBS1    | Thrombospondin-1;THBS1;ortholog                                             |
| CD93     | Complement component C1q receptor;CD93;ortholog                             |
| CDC42EP2 | Cdc42 effector protein 2;CDC42EP2;ortholog                                  |
| FGL2     | Fibroleukin;FGL2;ortholog                                                   |
| APOBEC3A | DNA dC-dU-editing enzyme APOBEC-3A;APOBEC3A;ortholog                        |
| LST1     | Leukocyte-specific transcript 1 protein;LST1;ortholog                       |
| TLR2     | Toll-like receptor 2;TLR2;ortholog                                          |
| IL10     | Interleukin-10;IL10;ortholog                                                |
| C5AR1    | C5a anaphylatoxin chemotactic receptor 1;C5AR1;ortholog                     |
| CD300E   | CMRF35-like molecule 2;CD300E;ortholog                                      |
| FCN1     | Ficolin-1;FCN1;ortholog                                                     |
| LILRA1   | Leukocyte immunoglobulin-like receptor subfamily A member 1;LILRA1;ortholog |
| S100A12  | Protein S100-A12;S100A12;ortholog                                           |
| S100A8   | Protein S100-A8;S100A8;ortholog                                             |
| LILRA2   | Leukocyte immunoglobulin-like receptor subfamily A member 2;LILRA2;ortholog |
| LILRA5   | Leukocyte immunoglobulin-like receptor subfamily A member 5;LILRA5;ortholog |
| HPSE     | Heparanase;HPSE;ortholog                                                    |
| CD14     | Monocyte differentiation antigen CD14;CD14;ortholog                         |
| SERPINB9 | Serpin B9;SERPINB9;ortholog                                                 |
| NFAM1    | NFAT activation molecule 1;NFAM1;ortholog                                   |
| RNF19B   | E3 ubiquitin-protein ligase RNF19B;RNF19B;ortholog                          |
| AQP9     | Aquaporin-9;AQP9;ortholog                                                   |
| NLRP3    | NACHT, LRR and PYD domains-containing protein 3;NLRP3;ortholog              |
| CFP      | Properdin;CFP;ortholog                                                      |

|          |                                                                             |
|----------|-----------------------------------------------------------------------------|
| NAIP     | Baculoviral IAP repeat-containing protein 1;NAIP;ortholog                   |
| S100A9   | Protein S100-A9;S100A9;ortholog                                             |
| CDA      | Cytidine deaminase;CDA;ortholog                                             |
| TNFSF13B | Tumor necrosis factor ligand superfamily member 13B;TNFSF13B;ortholog       |
| FPR2     | N-formyl peptide receptor 2;FPR2;ortholog                                   |
| FPR1     | fMet-Leu-Phe receptor;FPR1;ortholog                                         |
| CLEC4E   | C-type lectin domain family 4 member E;CLEC4E;ortholog                      |
| PLAUR    | Urokinase plasminogen activator surface receptor;PLAUR;ortholog             |
| TNFAIP6  | Tumor necrosis factor-inducible gene 6 protein;TNFAIP6;ortholog             |
| IL1R2    | Interleukin-1 receptor type 2;IL1R2;ortholog                                |
| RNASE2   | Non-secretory ribonuclease;RNASE2;ortholog                                  |
| IL1B     | Interleukin-1 beta;IL1B;ortholog                                            |
| LILRB2   | Leukocyte immunoglobulin-like receptor subfamily B member 2;LILRB2;ortholog |

---

**IPF COMPARED TO CONTROL SPP1 macrophages (28 genes >3-fold upregulated compared to all other cells)**

| GO biological process complete                    | Genes in process | Genes in list | Fold Enrichment | FDR      |
|---------------------------------------------------|------------------|---------------|-----------------|----------|
| extracellular structure organization (GO:0043062) | 381              | 8             | 15.75           | 4.55E-04 |
| extracellular matrix organization (GO:0030198)    | 335              | 7             | 15.67           | 1.98E-03 |
| leukocyte migration (GO:0050900)                  | 369              | 6             | 12.19           | 4.41E-02 |

**Extracellular structure organization (GO:0043062)**

|       |                                             |
|-------|---------------------------------------------|
| ITGA6 | Integrin alpha-6;ITGA6;ortholog             |
| PLTP  | Phospholipid transfer protein;PLTP;ortholog |
| FN1   | Fibronectin;FN1;ortholog                    |
| MMP7  | Matrilysin;MMP7;ortholog                    |
| SPARC | SPARC;SPARC;ortholog                        |
| ITGB5 | Integrin beta-5;ITGB5;ortholog              |
| CTSK  | Cathepsin K;CTSK;ortholog                   |
| SPP1  | Osteopontin;SPP1;ortholog                   |
